# Supplementary material for: Spatially resolved transcriptomics reveals pro-inflammatory fibroblast involved in lymphocyte recruitment through CXCL8 and CXCL10
Source: eLife. 2023 Jan 17;12:e81525. doi: 10.7554/eLife.81525 (PMC9897724; doi:10.7554/eLife.81525)
Supplement: Figure 1—source data 1. [file elife-81525-fig1-data1.xls]

## Sheet: A1-region0
	p_val	avg_log2FC	pct.1	pct.2	p_val_adj
KRT16	2.33297e-52	0.823086	1	1	3.4423e-48
KRT14	1.33398e-48	0.646286	1	1	1.96828e-44
KRT5	7.97609e-41	0.734687	1	0.994	1.17687e-36
UBC	3.60893e-40	-0.710869	1	1	5.32497e-36
S100A9	1.624e-29	0.605593	1	1	2.39621e-25
S100A8	3.39631e-19	0.357354	1	1	5.01125e-15
SLC25A3	1.29964e-15	-0.427421	0.169	0.523	1.91761e-11
ATP5PF	2.26439e-14	-0.364889	0.082	0.373	3.3411e-10
DNAJB6	5.32176e-14	-0.379822	0.14	0.454	7.85226e-10
STUB1	1.50081e-13	-0.377188	0.135	0.434	2.21445e-09
ATP5F1A	1.10841e-12	-0.340033	0.082	0.346	1.63546e-08
NAA50	2.21121e-12	-0.335103	0.111	0.385	3.26264e-08
CERS3	4.07771e-12	-0.416017	0.121	0.394	6.01666e-08
EMP2	4.36878e-12	-0.39397	0.174	0.459	6.44613e-08
CD82	4.73887e-12	-0.362801	0.184	0.482	6.9922e-08
TMEM54	7.44405e-12	-0.371984	0.135	0.41	1.09837e-07
ANAPC5	1.84035e-11	-0.394216	0.188	0.471	2.71543e-07
ATP5MG	3.70595e-11	-0.281471	0.155	0.436	5.46813e-07
ATP5F1E	6.03526e-11	-0.317894	0.242	0.561	8.90503e-07
SERP1	7.3032e-11	-0.256422	0.208	0.529	1.07759e-06
EXOC6B	7.33036e-11	-0.294136	0.227	0.536	1.0816e-06
ATP5MC3	7.85012e-11	-0.350779	0.164	0.44	1.15828e-06
BCAP31	8.14614e-11	-0.295699	0.188	0.484	1.20196e-06
SLC3A2	9.83176e-11	-0.271972	0.203	0.506	1.45068e-06
TOLLIP	1.01618e-10	-0.307504	0.203	0.503	1.49938e-06
LOR	1.06366e-10	-0.673788	0.952	0.712	1.56943e-06
BTG2	1.18272e-10	-0.400351	0.217	0.495	1.7451e-06
PTOV1	1.188e-10	-0.307744	0.13	0.38	1.75289e-06
HS3ST6	1.53251e-10	-0.346035	0.058	0.27	2.26121e-06
FASN	1.56492e-10	-0.275738	0.159	0.435	2.30904e-06
UBE4B	1.60604e-10	-0.275452	0.121	0.373	2.36971e-06
RIPK4	1.82577e-10	-0.280104	0.101	0.347	2.69393e-06
BCR	2.60542e-10	-0.287673	0.126	0.38	3.8443e-06
ELAVL1	2.86665e-10	-0.288532	0.087	0.317	4.22974e-06
PSMD2	3.02659e-10	-0.283739	0.121	0.361	4.46573e-06
IL17RE	3.04793e-10	-0.251258	0.019	0.203	4.49721e-06
SH3BP5L	3.8204e-10	-0.291855	0.077	0.3	5.63701e-06
STAU2	5.12919e-10	-0.26337	0.121	0.365	7.56812e-06
MPRIP	5.3803e-10	-0.262042	0.097	0.328	7.93863e-06
YY1	5.60153e-10	-0.295596	0.184	0.461	8.26506e-06
CANX	5.67317e-10	-0.271645	0.227	0.532	8.37076e-06
RNF141	5.82088e-10	-0.276395	0.126	0.367	8.58871e-06
JPT1	6.28158e-10	-0.305348	0.169	0.427	9.26847e-06
KIF5B	6.52874e-10	-0.274578	0.198	0.493	9.63316e-06
LGALS7	7.95742e-10	-0.345926	0.097	0.316	1.17412e-05
SIVA1	8.58099e-10	-0.308499	0.188	0.448	1.26613e-05
TENT5B	9.59314e-10	-0.287748	0.159	0.414	1.41547e-05
AP3D1	1.01352e-09	-0.280621	0.159	0.413	1.49545e-05
EIF3B	1.04048e-09	-0.265457	0.135	0.388	1.53522e-05
CLCN3	1.08116e-09	-0.2915	0.116	0.347	1.59526e-05
HINT1	1.18713e-09	-0.262637	0.159	0.426	1.75161e-05
APRT	1.21007e-09	-0.259878	0.179	0.447	1.78546e-05
ARHGAP32	1.27197e-09	-0.262595	0.106	0.339	1.87678e-05
TMED10	1.3148e-09	-0.275629	0.222	0.511	1.93999e-05
PYGL	1.34598e-09	-0.267123	0.072	0.281	1.98599e-05
FAM174C	1.38265e-09	-0.251358	0.063	0.267	2.0401e-05
INAVA	1.575e-09	-0.283849	0.14	0.388	2.32391e-05
ECHS1	1.57655e-09	-0.276313	0.126	0.358	2.32621e-05
SYPL1	1.63187e-09	-0.265969	0.101	0.322	2.40782e-05
GID8	1.83392e-09	-0.256009	0.203	0.477	2.70595e-05
DIAPH1	1.96042e-09	-0.260986	0.14	0.385	2.89259e-05
DHCR24	2.11481e-09	-0.313957	0.242	0.515	3.1204e-05
CSDE1	2.12999e-09	-0.286952	0.121	0.346	3.1428e-05
TFAP2A	2.27102e-09	-0.289	0.174	0.435	3.35089e-05
HK1	2.29757e-09	-0.311451	0.256	0.54	3.39006e-05
CAMSAP3	2.30636e-09	-0.267895	0.092	0.305	3.40303e-05
GNL3	2.34395e-09	-0.268179	0.15	0.39	3.4585e-05
GATAD2A	2.50826e-09	-0.256086	0.164	0.414	3.70094e-05
MYO5B	2.61312e-09	-0.283491	0.048	0.236	3.85566e-05
RNF11	2.63355e-09	-0.268041	0.179	0.437	3.88581e-05
ALDH3B2	2.67354e-09	-0.317615	0.101	0.313	3.94481e-05
PDZK1IP1	2.72185e-09	-0.412989	0.116	0.328	4.0161e-05
COX7B	2.74672e-09	-0.251214	0.106	0.33	4.05279e-05
RAB5A	2.76286e-09	-0.352984	0.208	0.476	4.07661e-05
DYNLT3	2.90176e-09	-0.263757	0.135	0.372	4.28154e-05
PDLIM4	3.00009e-09	-0.281598	0.121	0.346	4.42664e-05
XRCC6	3.00953e-09	-0.29993	0.164	0.404	4.44056e-05
RARS	3.03796e-09	-0.271913	0.116	0.342	4.48251e-05
NCK2	3.05895e-09	-0.270517	0.208	0.479	4.51348e-05
PAIP2	3.24279e-09	-0.255781	0.106	0.328	4.78474e-05
KLHL21	3.3491e-09	-0.257488	0.135	0.369	4.9416e-05
SURF4	3.46604e-09	-0.258319	0.184	0.436	5.11415e-05
BTG3	3.58583e-09	-0.335335	0.203	0.455	5.29089e-05
CCDC6	4.39053e-09	-0.271642	0.198	0.462	6.47823e-05
BCL2L1	4.90613e-09	-0.254054	0.063	0.251	7.23899e-05
NDUFS6	5.7106e-09	-0.278772	0.217	0.487	8.426e-05
DNAJC5	5.81662e-09	-0.272433	0.15	0.38	8.58242e-05
AP1G2	6.05926e-09	-0.287245	0.145	0.372	8.94044e-05
TMEM184A	6.44986e-09	-0.286586	0.068	0.262	9.51677e-05
RASSF5	6.73758e-09	-0.250419	0.063	0.249	9.94129e-05
GSDMC	6.83708e-09	-0.253126	0.121	0.343	0.000100881
CBX4	7.5915e-09	-0.274951	0.145	0.369	0.000112013
PACSIN3	8.22081e-09	-0.271555	0.106	0.314	0.000121298
ZBTB4	8.48982e-09	-0.270922	0.121	0.336	0.000125267
C1orf116	9.17093e-09	-0.450698	0.13	0.342	0.000135317
UBE2B	9.64326e-09	-0.265636	0.126	0.346	0.000142286
MYO18A	9.64895e-09	-0.261428	0.135	0.361	0.00014237
FAM83H	9.9852e-09	-0.320508	0.285	0.54	0.000147332
YPEL3	1.02904e-08	-0.277646	0.232	0.513	0.000151835
ARPC5L	1.04808e-08	-0.256597	0.213	0.469	0.000154644
HSPA2	1.04819e-08	-0.254872	0.121	0.342	0.00015466
FGFR3	1.09011e-08	-0.3324	0.222	0.473	0.000160846
FDCSP	1.09408e-08	-0.318037	0.44	0.277	0.000161432
ZNF219	1.09764e-08	-0.259793	0.14	0.37	0.000161957
SHISA5	1.09913e-08	-0.256627	0.14	0.365	0.000162177
TENT5C	1.12778e-08	-0.361893	0.019	0.175	0.000166405
SPRR2G	1.14721e-08	-0.455615	0.971	0.798	0.000169271
CUX1	1.19322e-08	-0.271467	0.198	0.447	0.00017606
APEX1	1.22281e-08	-0.271638	0.14	0.359	0.000180426
IMPA2	1.24197e-08	-0.337386	0.256	0.513	0.000183252
SPINT1	1.42012e-08	-0.335124	0.251	0.516	0.000209539
ASPH	1.4428e-08	-0.260785	0.198	0.453	0.000212884
TIA1	1.541e-08	-0.275552	0.145	0.369	0.000227374
PLCH2	1.5991e-08	-0.266974	0.145	0.369	0.000235947
GPNMB	1.71079e-08	-0.31168	0.246	0.498	0.000252427
SOX4	1.89455e-08	-0.255448	0.145	0.377	0.000279542
IER3	1.95873e-08	-0.339641	0.169	0.392	0.00028901
ZNF428	2.0995e-08	-0.252437	0.072	0.255	0.000309781
ZNF385A	2.11011e-08	-0.280315	0.246	0.51	0.000311346
FAM83B	2.14303e-08	-0.30605	0.179	0.413	0.000316204
DYNLL1	2.15064e-08	-0.277625	0.29	0.581	0.000317327
SCNN1A	2.58007e-08	-0.317766	0.077	0.263	0.00038069
MTPN	2.65443e-08	-0.321841	0.208	0.454	0.000391661
DUSP14	2.69977e-08	-0.355628	0.111	0.316	0.000398351
CSK	2.93429e-08	-0.250409	0.135	0.355	0.000432954
BST2	2.98523e-08	-0.417257	0.179	0.401	0.000440471
HIST1H2AD	3.21784e-08	-0.256686	0.053	0.226	0.000474792
ENAH	3.36474e-08	-0.260761	0.135	0.345	0.000496468
ME1	3.42209e-08	-0.256368	0.068	0.246	0.000504929
KIAA1522	3.55086e-08	-0.324659	0.266	0.503	0.00052393
DYNLL2	3.5878e-08	-0.260986	0.193	0.437	0.000529381
DHX15	3.95744e-08	-0.286746	0.193	0.425	0.00058392
ZNF598	4.13981e-08	-0.250878	0.174	0.402	0.000610829
MDH2	4.51502e-08	-0.253674	0.155	0.372	0.000666191
RND3	4.86406e-08	-0.253406	0.082	0.263	0.000717692
SYTL1	5.83183e-08	-0.31563	0.271	0.52	0.000860486
GRN	5.92525e-08	-0.252744	0.237	0.484	0.00087427
HMGB1	5.98154e-08	-0.284884	0.227	0.47	0.000882576
FLNB	5.98322e-08	-0.265658	0.169	0.395	0.000882823
MAB21L4	6.26997e-08	-0.30579	0.072	0.249	0.000925133
FSCN1	6.97766e-08	-0.268913	0.116	0.31	0.00102955
SCD	7.19449e-08	-0.328375	0.135	0.335	0.00106155
RNF187	7.316e-08	-0.260905	0.333	0.603	0.00107948
RASAL1	7.34652e-08	-0.321207	0.072	0.245	0.00108398
LMF2	7.45173e-08	-0.25684	0.126	0.323	0.0010995
IGHG2	7.51005e-08	-0.777832	1	0.714	0.00110811
SOD2	7.68303e-08	-0.289	0.179	0.406	0.00113363
DDIT4	9.00011e-08	-0.260873	0.135	0.336	0.00132797
RHOD	9.32518e-08	-0.31245	0.198	0.431	0.00137593
ID2	9.39497e-08	-0.256009	0.203	0.437	0.00138623
METAP2	1.00164e-07	-0.25214	0.126	0.325	0.00147792
TPPP3	1.00433e-07	-0.419038	0.208	0.422	0.00148188
NEFL	1.00994e-07	-0.286818	0.072	0.243	0.00149017
GGNBP2	1.02165e-07	-0.256535	0.159	0.369	0.00150745
NINJ1	1.09193e-07	-0.25415	0.068	0.233	0.00161114
CYSRT1	1.12196e-07	-0.45087	0.106	0.283	0.00165546
ATF3	1.14789e-07	-0.326653	0.116	0.299	0.00169371
ACIN1	1.17253e-07	-0.253161	0.222	0.468	0.00173006
BICDL2	1.17288e-07	-0.282458	0.087	0.267	0.00173058
BLCAP	1.18182e-07	-0.254768	0.169	0.385	0.00174378
PRDX6	1.1883e-07	-0.251805	0.3	0.581	0.00175334
ZDHHC13	1.23948e-07	-0.296601	0.082	0.257	0.00182885
TMEM40	1.3271e-07	-0.351343	0.174	0.379	0.00195813
PRXL2A	1.33371e-07	-0.300624	0.14	0.337	0.00196789
NDRG1	1.40106e-07	-0.258093	0.271	0.54	0.00206727
CLIC1	1.54617e-07	-0.264305	0.357	0.614	0.00228137
TUBB6	1.74131e-07	-0.253175	0.188	0.409	0.0025693
TAF15	1.74765e-07	-0.305823	0.386	0.608	0.00257866
CDKN1A	1.8503e-07	-0.282929	0.304	0.555	0.00273012
ITGA3	1.87007e-07	-0.258637	0.082	0.251	0.00275929
ZFAND6	1.90757e-07	-0.251194	0.063	0.227	0.00281462
HSPB8	1.95218e-07	-0.306127	0.111	0.296	0.00288044
PGLYRP3	2.07848e-07	-0.317015	0.13	0.319	0.00306679
RIN2	2.15451e-07	-0.255175	0.106	0.286	0.00317898
IL20RB	2.30772e-07	-0.250017	0.203	0.429	0.00340505
SOX21	2.31549e-07	-0.272449	0.155	0.359	0.00341651
KCTD11	2.32234e-07	-0.252972	0.063	0.22	0.00342661
JAG2	2.72772e-07	-0.275973	0.15	0.345	0.00402475
ZNF750	2.7366e-07	-0.327897	0.295	0.532	0.00403786
GRHL1	2.7775e-07	-0.376282	0.188	0.389	0.0040982
HNRNPR	3.04267e-07	-0.285528	0.309	0.555	0.00448946
EPHA2	3.44881e-07	-0.316386	0.208	0.427	0.00508872
DAPL1	3.48879e-07	-0.266768	0.121	0.305	0.00514772
GALNT1	3.50145e-07	-0.313012	0.188	0.397	0.0051664
SPRR3	3.53121e-07	-0.675583	1	0.94	0.00521031
TM4SF1	3.78585e-07	-0.351061	0.159	0.363	0.00558602
C4orf3	4.04904e-07	-0.323464	0.324	0.556	0.00597436
CRNN	4.07492e-07	-0.714489	0.966	0.764	0.00601255
PRSS8	4.2559e-07	-0.272415	0.116	0.296	0.00627958
VASN	5.32545e-07	-0.301013	0.072	0.23	0.00785771
PPP1CB	5.6564e-07	-0.270489	0.348	0.6	0.00834601
SNRNP70	5.71808e-07	0.301669	0.928	0.749	0.00843703
TRPV3	5.79354e-07	-0.253497	0.077	0.238	0.00854837
JDP2	5.93007e-07	-0.278411	0.203	0.417	0.00874981
CLIP1	6.3174e-07	-0.261333	0.275	0.531	0.00932133
CDA	7.05059e-07	-0.335596	0.068	0.221	0.0104031
CA12	7.30439e-07	-0.293024	0.237	0.448	0.0107776
SORT1	7.80001e-07	-0.260073	0.116	0.292	0.0115089
HMGCR	8.2333e-07	-0.276138	0.106	0.283	0.0121482
HIST1H4D	8.95317e-07	-0.309713	0.15	0.329	0.0132104
CYBA	9.32357e-07	-0.400252	0.164	0.342	0.0137569
CHMP4C	9.47201e-07	-0.287325	0.077	0.234	0.013976
PHLDA1	9.79235e-07	-0.355274	0.092	0.252	0.0144486
GJB6	1.07012e-06	-0.44871	0.217	0.412	0.0157896
LRATD1	1.1745e-06	-0.256767	0.203	0.41	0.0173297
VSIG10L	1.25763e-06	-0.373308	0.082	0.232	0.0185563
ISG15	1.29103e-06	-0.32083	0.126	0.299	0.0190492
SLC47A2	1.31759e-06	-0.281052	0.208	0.397	0.019441
RAB11A	1.44658e-06	-0.280568	0.295	0.52	0.0213443
PPP1R3C	1.5539e-06	-0.35032	0.145	0.323	0.0229278
FOS	1.6077e-06	0.28281	1	0.925	0.0237217
MALL	1.78738e-06	-0.337386	0.184	0.361	0.0263727
SEPTIN8	2.00803e-06	-0.266364	0.217	0.435	0.0296285
PCDH7	2.35719e-06	-0.260502	0.097	0.25	0.0347804
LRRC15	2.47901e-06	-0.26973	0.077	0.222	0.0365777
IGHG1	2.52731e-06	-0.802092	0.928	0.589	0.0372905
MTCL1	2.67163e-06	-0.250065	0.15	0.328	0.0394199
GPC1	2.69572e-06	-0.298671	0.372	0.579	0.0397753
CLDN1	2.88288e-06	-0.369482	0.222	0.415	0.0425368
WWTR1	3.06106e-06	-0.261465	0.097	0.251	0.0451659
GAS1	3.2211e-06	-0.368958	0.401	0.596	0.0475274
NAB1	3.45041e-06	-0.282882	0.261	0.461	0.0509108
CTHRC1	3.51219e-06	-0.25776	0.097	0.247	0.0518224
SULT2B1	3.63316e-06	-0.43687	0.222	0.401	0.0536072
PIM1	3.69148e-06	-0.457914	0.232	0.422	0.0544677
APCDD1	3.6917e-06	-0.26496	0.164	0.341	0.0544711
MAZ	3.92144e-06	-0.251997	0.271	0.496	0.0578609
VPS37B	4.25491e-06	-0.275955	0.087	0.233	0.0627813
MXD1	4.72518e-06	-0.442405	0.164	0.339	0.06972
TP53INP2	4.93593e-06	-0.443053	0.155	0.316	0.0728296
MT1X	5.11221e-06	-0.414181	0.329	0.523	0.0754307
CLIC3	6.3577e-06	-0.585146	0.237	0.401	0.0938078
LCN2	6.66644e-06	-0.603511	0.053	0.178	0.0983633
QSOX1	7.28834e-06	-0.355936	0.246	0.449	0.107539
HEPHL1	7.63933e-06	-0.422078	0.101	0.244	0.112718
SDR16C5	7.99434e-06	-0.284421	0.179	0.35	0.117956
KRT4	8.17777e-06	-0.932991	0.947	0.703	0.120663
IGLC1	8.30106e-06	-0.803944	0.947	0.59	0.122482
ARHGDIB	9.00917e-06	-0.278749	0.116	0.262	0.13293
SERPINB11	9.15579e-06	-0.434529	0.15	0.304	0.135094
DEGS1	9.25462e-06	-0.254298	0.237	0.43	0.136552
CRCT1	9.30305e-06	-0.867275	0.942	0.673	0.137267
ARGLU1	9.37812e-06	0.2879	0.966	0.778	0.138374
AKR1B10	1.09688e-05	-0.305569	0.275	0.465	0.161845
GPRC5A	1.1276e-05	-0.303403	0.058	0.186	0.166377
CDHR1	1.13074e-05	-0.277729	0.145	0.302	0.16684
TXNDC5	1.14485e-05	-0.422551	0.314	0.513	0.168923
C10orf99	1.24633e-05	-0.2706	0.169	0.326	0.183896
MAL2	1.38809e-05	-0.257562	0.343	0.549	0.204812
IGFBP3	1.55492e-05	-0.303608	0.135	0.292	0.229428
TNFRSF21	1.56388e-05	-0.279723	0.198	0.372	0.230751
TTC9	1.76856e-05	-0.369394	0.121	0.262	0.260952
CITED4	2.00943e-05	-0.270031	0.261	0.459	0.296491
FMO2	2.27667e-05	-0.410532	0.106	0.242	0.335923
GM2A	2.30642e-05	-0.406915	0.314	0.53	0.340312
TGM1	2.43736e-05	-0.61056	0.246	0.401	0.359633
UGCG	2.50438e-05	-0.278117	0.15	0.301	0.369521
CD79A	2.57023e-05	-0.307462	0.048	0.16	0.379237
ATP1B1	3.22961e-05	-0.400679	0.169	0.323	0.47653
SPRR2D	3.23453e-05	-0.587256	0.981	0.785	0.477255
DLX3	3.37748e-05	-0.255536	0.155	0.309	0.498347
BNIP3L	3.6198e-05	-0.266792	0.198	0.375	0.534102
CLDN4	3.78013e-05	-0.408319	0.188	0.337	0.557759
CEACAM5	3.8566e-05	-0.323151	0.068	0.185	0.569041
BGN	4.01168e-05	-0.294958	0.266	0.439	0.591923
PRRX1	4.15752e-05	-0.332466	0.329	0.495	0.613441
SPRR2A	4.23119e-05	-0.265281	1	0.952	0.624312
LRRC20	4.77563e-05	-0.263555	0.043	0.149	0.704644
CLCA4	4.90663e-05	-0.4126	0.039	0.14	0.723974
IL36RN	5.01751e-05	-0.532398	0.13	0.267	0.740334
SLURP2	5.5005e-05	-0.493966	0.251	0.409	0.811599
SDR9C7	7.40561e-05	-0.283947	0.082	0.198	1
EPS8L1	8.13933e-05	-0.459272	0.111	0.237	1
HIST1H1B	8.45234e-05	-0.390199	0.222	0.375	1
ATG9B	8.83523e-05	-0.318863	0.034	0.128	1
IGHA1	8.83926e-05	-0.917267	0.986	0.677	1
F3	0.000105919	-0.401059	0.256	0.415	1
ELOVL4	0.000118733	-0.327189	0.159	0.299	1
LYPD2	0.000123918	-0.284178	0.043	0.14	1
ALOX12	0.000124065	-0.774243	0.145	0.276	1
HLA-DPB1	0.000127564	-0.302045	0.15	0.293	1
CITED2	0.000133216	-0.335143	0.179	0.322	1
IGKC	0.000135858	-1.44955	1	1	1
GPX3	0.000143837	-0.485088	0.275	0.411	1
SERPINB1	0.000153255	-0.360025	0.155	0.286	1
CRIP1	0.000153391	-0.29417	0.372	0.543	1
FBXO45	0.000187045	-0.250026	0.072	0.178	1
CSTB	0.000194184	-0.524189	1	1	1
SPRR2F	0.000196784	-0.39036	0.043	0.136	1
CLDN17	0.000220695	-0.306222	0.043	0.135	1
THEM5	0.000236321	-0.255894	0.135	0.26	1
ALOX12B	0.000246299	-0.544331	0.155	0.283	1
CD55	0.000248187	-0.298167	0.324	0.51	1
LAMB3	0.000249321	-0.355557	0.251	0.402	1
PLBD1	0.000271416	-0.25789	0.121	0.241	1
ECM1	0.000291908	-0.599074	0.203	0.337	1
ABCA12	0.000306393	-0.301004	0.174	0.301	1
TGM7	0.00031066	-0.261961	0.077	0.179	1
GRHL3	0.000363407	-0.273294	0.304	0.476	1
VCAN	0.000385268	-0.36992	0.266	0.395	1
ATP6V1C2	0.000485049	-0.359367	0.087	0.188	1
ELF3	0.000495131	-0.334015	0.072	0.171	1
PPIF	0.000521767	-0.520904	0.246	0.386	1
WFDC5	0.000570622	-0.374892	0.097	0.198	1
FAM83G	0.000620973	-0.25882	0.406	0.556	1
RNF225	0.000666298	-0.42591	0.126	0.238	1
C15orf48	0.000707184	-0.540028	0.097	0.195	1
PRDM1	0.000714778	-0.311368	0.155	0.263	1
KRTDAP	0.000719193	-0.38826	0.99	0.806	1
NCCRP1	0.000739548	-0.62174	0.251	0.379	1
ANXA9	0.000743363	-0.261115	0.043	0.124	1
KLK12	0.00076619	-0.548088	0.232	0.359	1
MAP1LC3A	0.000785419	-0.265371	0.184	0.311	1
APOE	0.00078743	-0.406446	0.261	0.384	1
ERO1A	0.000846291	-0.617124	0.193	0.326	1
IL32	0.000851111	-0.26775	0.106	0.211	1
COL5A1	0.000880323	-0.278191	0.271	0.4	1
ANXA1	0.000906604	-0.310857	1	0.986	1
DSC1	0.00094606	-0.415792	0.116	0.216	1
MMP2	0.000948232	-0.512833	0.386	0.48	1
SLURP1	0.000994822	-0.545409	0.217	0.345	1
TGM3	0.000997173	-0.430419	0.99	0.854	1
FAM43A	0.00103004	-0.305753	0.275	0.429	1
COL11A1	0.00103331	-0.294036	0.198	0.309	1
KLK14	0.00106541	-0.412629	0.092	0.187	1
IGHV6-1	0.00114644	-0.364757	0.082	0.171	1
TMPRSS11E	0.00116468	-0.651594	0.14	0.25	1
PRSS27	0.00118803	-0.540618	0.198	0.313	1
OCLN	0.0012507	-0.256645	0.116	0.22	1
YOD1	0.0012795	-0.30138	0.101	0.2	1
LYZ	0.00137626	-0.313061	0.111	0.21	1
FUT6	0.00144178	-0.281414	0.043	0.118	1
LMO7	0.0014428	-0.38395	0.246	0.38	1
IGLV3-1	0.00157643	-1.09113	0.222	0.322	1
COL12A1	0.00168964	-0.372507	0.246	0.365	1
CPA4	0.00169362	-0.285901	0.097	0.186	1
CXCL13	0.00175911	-0.445483	0.087	0.174	1
SFRP4	0.00214223	-0.3617	0.121	0.215	1
TGM6	0.00229062	-0.483425	0.164	0.259	1
FSTL1	0.00237323	-0.278676	0.343	0.469	1
MAL	0.00241798	-0.763384	0.792	0.604	1
CNFN	0.00246556	-0.635581	0.976	0.806	1
POF1B	0.00255232	-0.40495	0.237	0.365	1
TMEM45A	0.0028735	-0.283354	0.155	0.252	1
MZB1	0.00328872	-0.294901	0.121	0.207	1
SPRR2B	0.00388268	-0.265672	0.048	0.116	1
CLDN7	0.00413583	-0.273787	0.169	0.274	1
SPINK5	0.00416506	-0.348466	0.957	0.765	1
WFDC12	0.00427495	-0.444896	0.106	0.19	1
TREX2	0.00432493	-0.306046	0.087	0.166	1
CYP4F22	0.00449102	-0.309138	0.135	0.221	1
CTSK	0.00478046	-0.296326	0.314	0.419	1
AEBP1	0.00599479	-0.437539	0.464	0.531	1
IGHM	0.00612721	-0.417858	0.126	0.216	1
C1S	0.00628312	-0.365415	0.372	0.469	1
NR4A1	0.00645047	-0.263361	0.338	0.449	1
PSORS1C2	0.00652574	-0.349373	0.048	0.111	1
ADIRF	0.00683936	-0.317769	0.329	0.44	1
SPINK7	0.00733954	-0.784418	0.826	0.6	1
CALML5	0.00775877	-0.86794	0.314	0.436	1
CCL19	0.00776488	-0.33299	0.111	0.187	1
LYPD5	0.00978349	-0.314025	0.097	0.169	1
PLA2G4D	0.0100998	-0.52966	0.14	0.221	1
KLK6	0.01292	-0.360292	0.106	0.18	1
KLK10	0.0135566	-0.523721	0.855	0.636	1
SPNS2	0.0139059	-0.412348	0.184	0.263	1
KLK13	0.0139618	-0.386483	0.754	0.593	1
IL36A	0.0139917	-0.509204	0.155	0.23	1
IL36G	0.0142257	-0.504075	0.203	0.286	1
LCE3E	0.01514	-0.651289	0.15	0.23	1
JCHAIN	0.0162792	-0.891267	0.367	0.428	1
RHCG	0.0214504	-0.526963	0.913	0.714	1
ASPRV1	0.0220533	-0.812068	0.15	0.224	1
IGHG3	0.0243719	-1.08465	0.415	0.468	1
COL1A2	0.0268214	-0.475133	1	0.978	1
GSDMA	0.0312791	-0.28384	0.087	0.144	1
PI3	0.0350241	-0.596589	0.198	0.262	1
THBS2	0.0398705	-0.250543	0.353	0.422	1
KRT23	0.0416161	-0.283209	0.082	0.135	1
IGFBP7	0.0622064	-0.266784	0.435	0.519	1
S100A7	0.0700786	-0.700196	0.614	0.524	1
EMP1	0.0762062	-0.516585	0.952	0.838	1
C1R	0.0806154	-0.388674	0.575	0.573	1
SLPI	0.0899388	-0.264762	0.841	0.679	1
IGKV4-1	0.0920415	-0.709325	0.319	0.365	1
HLA-DRA	0.0928971	-0.255427	0.266	0.341	1
COL1A1	0.0932618	-0.539563	1	0.902	1
LSP1	0.0953576	-0.27595	0.536	0.574	1
TACSTD2	0.130559	-0.267511	0.976	0.858	1
DMKN	0.170056	-0.267784	0.411	0.493	1
TMPRSS11B	0.191425	-0.656795	0.295	0.346	1
CCER2	0.22729	-0.608476	0.232	0.2	1
FLG	0.232518	-0.263668	0.184	0.228	1
KRT76	0.235551	-1.09075	1	1	1
LCE3D	0.265066	-0.993013	0.522	0.501	1
LCE2C	0.28247	-0.269518	0.101	0.129	1
A2ML1	0.308031	-0.261541	0.792	0.597	1
GLUL	0.338777	-0.395218	0.841	0.734	1
HOPX	0.33977	-0.434381	0.928	0.813	1
GLTP	0.346885	-0.394842	0.749	0.653	1
KRT3	0.358721	-0.398718	0.671	0.564	1
MUC21	0.373504	-0.945907	0.319	0.351	1
CD74	0.392312	-0.425207	0.575	0.551	1
IVL	0.411009	-0.295682	0.961	0.812	1
LUM	0.456502	-0.270311	0.522	0.52	1
KRT6B	0.479534	-0.283439	1	0.991	1
COL3A1	0.48467	-0.358469	1	0.911	1
IGFBP4	0.497089	-0.265656	0.812	0.588	1
IGHG4	0.505874	-1.03202	0.454	0.4	1
KLK7	0.520518	-0.549264	0.415	0.447	1
SCEL	0.527958	-0.254443	0.517	0.511	1
KRT2	0.594686	-0.705771	0.333	0.376	1
KRT78	0.6025	-0.896429	0.522	0.486	1
KRT80	0.631973	-0.646615	0.469	0.493	1
SPRR1B	0.773405	-0.36402	0.705	0.598	1
RPTN	0.781145	-0.861082	0.377	0.404	1
PPL	0.789399	-0.403392	0.932	0.868	1
CDSN	0.890131	-1.04703	0.391	0.401	1

## Sheet: A1-region1
	p_val	avg_log2FC	pct.1	pct.2	p_val_adj
A2M	8.4101e-48	1.06765	0.637	0.128	1.24091e-43
IGFBP7	3.14072e-41	1.32436	0.911	0.445	4.63414e-37
CXCL12	3.75196e-36	1.25792	0.941	0.483	5.53602e-32
VIM	1.51513e-35	1.08965	1	0.706	2.23557e-31
TIMP3	3.14198e-35	0.930774	0.763	0.258	4.63599e-31
CLDN5	1.58668e-33	0.655178	0.4	0.063	2.34115e-29
AQP1	1.63612e-33	1.24407	0.785	0.314	2.4141e-29
CLU	4.64904e-32	1.04961	0.756	0.295	6.85966e-28
CCL14	9.17683e-32	0.72831	0.444	0.087	1.35404e-27
CLEC14A	1.14677e-31	0.71291	0.489	0.11	1.69205e-27
GGT5	3.34027e-29	0.64581	0.556	0.151	4.92857e-25
CLEC3B	7.39111e-29	0.751345	0.57	0.164	1.09056e-24
GSN	7.58493e-29	0.986121	0.948	0.836	1.11916e-24
ADCY4	6.55411e-28	0.650241	0.496	0.127	9.67059e-24
LIMS2	2.48738e-27	0.535608	0.474	0.113	3.67014e-23
RGS5	1.16319e-26	0.627835	0.415	0.088	1.71629e-22
PLXND1	1.42356e-26	0.756425	0.63	0.221	2.10046e-22
IGFBP5	1.69578e-26	0.856404	0.985	0.744	2.50212e-22
APOD	5.86985e-26	1.25896	0.63	0.232	8.66096e-22
IFITM2	9.3644e-26	0.803181	0.889	0.483	1.38172e-21
APOE	2.08687e-25	0.957424	0.726	0.308	3.07918e-21
TINAGL1	2.46636e-25	0.407805	0.319	0.052	3.63912e-21
SOX18	1.0299e-23	0.50042	0.326	0.062	1.51961e-19
HSPG2	1.50626e-23	0.786124	0.763	0.347	2.22249e-19
TAGLN	2.2947e-23	0.683965	0.533	0.163	3.38582e-19
IGFBP4	5.6245e-22	0.696102	0.926	0.589	8.29895e-18
CD74	2.20141e-21	0.596775	0.867	0.511	3.24819e-17
TNXB	4.58858e-21	0.4477	0.467	0.134	6.77045e-17
C11orf96	1.36069e-20	0.541077	0.422	0.116	2.0077e-16
IGKC	1.772e-20	0.978184	1	1	2.61459e-16
IGHA1	1.80071e-20	0.770079	0.956	0.704	2.65694e-16
COL15A1	1.94139e-20	0.535133	0.356	0.085	2.86452e-16
KCTD12	3.06335e-20	0.774411	0.57	0.227	4.51998e-16
FBN1	5.41954e-20	0.697925	0.874	0.445	7.99652e-16
TPM2	8.36276e-20	0.63189	0.711	0.319	1.23393e-15
IGHG2	9.37422e-20	1.18135	0.985	0.738	1.38317e-15
VCAN	1.4316e-19	0.690783	0.711	0.322	2.11232e-15
ENG	3.75951e-19	0.424157	0.37	0.094	5.54715e-15
CD34	3.90235e-19	0.421978	0.326	0.076	5.75792e-15
MCAM	4.83534e-19	0.683965	0.504	0.183	7.13454e-15
TNS2	5.51543e-19	0.423388	0.459	0.141	8.13801e-15
SFRP4	6.21272e-19	0.601704	0.481	0.156	9.16687e-15
CAVIN1	9.26485e-19	0.677257	0.919	0.789	1.36703e-14
C1R	9.34199e-19	0.643314	0.896	0.528	1.37841e-14
MYL9	1.2684e-18	0.884143	0.548	0.221	1.87153e-14
C1S	1.64537e-18	0.606848	0.807	0.4	2.42775e-14
FABP5	2.94717e-18	-0.698377	0.985	0.995	4.34855e-14
SPARCL1	3.35382e-18	0.483674	0.444	0.14	4.94856e-14
ACTA2	3.58244e-18	0.88192	0.467	0.163	5.28588e-14
NOTCH4	4.64894e-18	0.297043	0.237	0.041	6.85952e-14
GNG11	4.69175e-18	0.407214	0.356	0.093	6.92268e-14
FOS	9.2771e-18	0.589184	1	0.931	1.36884e-13
TMSB4X	1.01778e-17	0.579309	0.985	0.965	1.50174e-13
TIE1	1.38825e-17	0.29304	0.222	0.037	2.04837e-13
LUM	1.49634e-17	0.643958	0.859	0.472	2.20786e-13
CTNNBIP1	1.62142e-17	-0.698756	0.585	0.887	2.39241e-13
LMCD1	2.00379e-17	0.295601	0.281	0.06	2.9566e-13
ACKR1	2.57836e-17	0.481194	0.341	0.09	3.80436e-13
JUN	2.60119e-17	0.671606	0.896	0.677	3.83806e-13
SOCS3	5.55372e-17	0.636379	0.644	0.307	8.19452e-13
COL6A2	7.37407e-17	0.595094	0.956	0.613	1.08804e-12
IGLC1	8.24849e-17	0.982876	0.911	0.622	1.21707e-12
ITGA7	8.79515e-17	0.413383	0.274	0.06	1.29772e-12
SOD3	1.01554e-16	0.637028	0.689	0.333	1.49843e-12
SHE	1.01673e-16	0.306983	0.259	0.054	1.50018e-12
DCN	1.09514e-16	0.65596	1	0.726	1.61588e-12
PRKG1	1.4532e-16	0.422544	0.459	0.156	2.1442e-12
DEPP1	1.73704e-16	0.449822	0.319	0.084	2.563e-12
COL4A1	1.9689e-16	0.554311	0.474	0.171	2.90512e-12
PLVAP	2.05665e-16	0.387103	0.341	0.094	3.03458e-12
PDGFB	2.14006e-16	0.286612	0.252	0.051	3.15765e-12
S100A14	2.49927e-16	-0.818659	0.904	0.975	3.68767e-12
C1orf115	2.95853e-16	0.260394	0.222	0.04	4.36531e-12
COL6A1	2.98584e-16	0.592924	0.948	0.634	4.4056e-12
HES4	4.61857e-16	0.633874	0.578	0.267	6.8147e-12
AEBP1	5.4521e-16	0.520836	0.874	0.468	8.04458e-12
IGKV4-1	6.26858e-16	1.19914	0.652	0.315	9.2493e-12
FOSB	6.4356e-16	0.666521	0.978	0.794	9.49573e-12
RAMP2	6.85569e-16	0.275676	0.237	0.047	1.01156e-11
IFITM3	7.42477e-16	0.682748	0.948	0.762	1.09553e-11
EVPL	8.78291e-16	-0.668535	0.585	0.885	1.29592e-11
CDH5	1.11485e-15	0.457137	0.363	0.111	1.64496e-11
EGFL7	1.84747e-15	0.366344	0.289	0.072	2.72595e-11
KRT6B	2.29757e-15	-0.989048	1	0.992	3.39007e-11
NR2F2	2.31528e-15	0.305929	0.319	0.085	3.41619e-11
ADIRF	2.47673e-15	0.610784	0.696	0.38	3.65442e-11
MMP2	2.6728e-15	0.513425	0.793	0.416	3.94372e-11
HLA-E	2.95772e-15	0.515496	0.978	0.964	4.36411e-11
PITX1	3.02538e-15	-0.671442	0.459	0.795	4.46395e-11
FSTL1	3.45214e-15	0.480159	0.793	0.396	5.09363e-11
IGHG1	3.58895e-15	1.19631	0.919	0.616	5.29549e-11
STOM	4.42966e-15	0.478893	0.467	0.178	6.53597e-11
RNASE1	5.41456e-15	0.377294	0.407	0.135	7.98918e-11
CD63	5.47972e-15	0.565471	0.852	0.623	8.08532e-11
COL4A2	9.70308e-15	0.437227	0.444	0.166	1.43169e-10
FTL	1.07216e-14	0.567585	0.919	0.752	1.58197e-10
PTP4A3	1.43535e-14	0.46662	0.341	0.106	2.11786e-10
KLF5	1.51776e-14	-0.596782	0.467	0.784	2.23946e-10
S100A8	1.92087e-14	-0.801404	1	1	2.83424e-10
LAD1	1.96666e-14	-0.659829	0.444	0.757	2.90181e-10
TXNIP	2.253e-14	0.615226	0.778	0.458	3.3243e-10
HSPB1	2.25483e-14	-0.53087	1	0.999	3.327e-10
APLNR	2.63531e-14	0.297748	0.222	0.046	3.88841e-10
COL18A1	2.9234e-14	0.590271	0.644	0.34	4.31347e-10
S100A16	4.11148e-14	-0.696015	0.77	0.908	6.06648e-10
GASK1B	4.4413e-14	0.348211	0.289	0.079	6.55314e-10
CFD	4.53348e-14	0.691892	0.63	0.342	6.68915e-10
TNS1	4.81321e-14	0.478973	0.467	0.188	7.10189e-10
CFH	5.07831e-14	0.570736	0.511	0.232	7.49305e-10
PKP1	5.34997e-14	-0.592878	0.948	0.971	7.89388e-10
GIMAP1	9.58556e-14	0.30455	0.289	0.079	1.41435e-09
ADAM33	1.23479e-13	0.411248	0.474	0.189	1.82193e-09
SHANK3	1.63982e-13	0.547656	0.496	0.213	2.41956e-09
S100A4	1.65634e-13	0.542999	0.896	0.571	2.44394e-09
KRT76	1.67544e-13	-1.48013	1	1	2.47211e-09
DSG3	1.74496e-13	-0.720075	0.756	0.901	2.57469e-09
NPDC1	2.05904e-13	0.503638	0.459	0.197	3.03811e-09
PTGDS	2.41779e-13	0.673538	0.867	0.552	3.56745e-09
ECE1	2.41857e-13	0.427199	0.496	0.208	3.5686e-09
VWF	3.0645e-13	0.582654	0.43	0.173	4.52166e-09
PMP22	3.96916e-13	0.565576	0.444	0.173	5.8565e-09
LAMA4	4.8496e-13	0.4779	0.541	0.251	7.15558e-09
JCHAIN	5.29815e-13	0.439093	0.711	0.375	7.81742e-09
S100A9	5.34386e-13	-0.806111	1	1	7.88486e-09
PKP3	5.57391e-13	-0.59202	0.474	0.75	8.2243e-09
MMRN2	5.88784e-13	0.2662	0.193	0.039	8.6875e-09
ARHGEF40	6.02237e-13	0.320538	0.37	0.128	8.88601e-09
CD93	7.56127e-13	0.28601	0.244	0.062	1.11567e-08
ALPL	7.70941e-13	0.278709	0.341	0.109	1.13752e-08
PECAM1	7.71477e-13	0.380405	0.385	0.14	1.13831e-08
NES	8.34476e-13	0.290075	0.289	0.084	1.23127e-08
SNED1	1.13351e-12	0.29833	0.311	0.097	1.67249e-08
TRIM29	1.35749e-12	-0.48917	1	0.995	2.00297e-08
FBLN2	1.41449e-12	0.556838	0.652	0.359	2.08708e-08
PREX2	1.56397e-12	0.270355	0.2	0.044	2.30764e-08
MXRA8	1.60978e-12	0.401051	0.637	0.304	2.37523e-08
KRT14	1.664e-12	-0.422054	1	1	2.45523e-08
IGHG4	1.72063e-12	0.670989	0.689	0.37	2.53879e-08
GJB2	1.75945e-12	-0.75896	0.741	0.899	2.59606e-08
FBLN1	2.15211e-12	0.526977	0.822	0.505	3.17543e-08
TACSTD2	2.35935e-12	-0.735334	0.719	0.903	3.48122e-08
NFATC4	2.45827e-12	0.357249	0.526	0.226	3.62718e-08
RCAN2	2.45943e-12	0.254732	0.193	0.041	3.62889e-08
DSG1	2.6538e-12	-0.689497	0.948	0.96	3.91568e-08
C19orf33	4.02784e-12	-0.54771	0.4	0.717	5.94308e-08
SCARA5	4.70121e-12	0.280893	0.222	0.056	6.93664e-08
FGD5	5.0185e-12	0.295955	0.267	0.078	7.4048e-08
SULF1	5.4044e-12	0.360772	0.274	0.08	7.9742e-08
PTPRB	5.75637e-12	0.287918	0.259	0.072	8.49352e-08
LYPD3	5.76145e-12	-0.693238	0.911	0.959	8.50102e-08
LAMB1	6.23245e-12	0.365855	0.37	0.135	9.19598e-08
TMPRSS11D	7.4406e-12	-0.722089	0.615	0.83	1.09786e-07
DSP	7.49579e-12	-0.555523	0.978	0.991	1.106e-07
EGR1	7.77647e-12	0.498723	0.867	0.655	1.14742e-07
PODXL	7.9178e-12	0.287427	0.23	0.06	1.16827e-07
PDGFRB	1.28277e-11	0.4649	0.6	0.299	1.89272e-07
JUP	1.34643e-11	-0.531558	0.956	0.983	1.98666e-07
SERPINB5	1.38315e-11	-0.599172	0.37	0.665	2.04084e-07
CLTB	1.49963e-11	-0.512386	0.8	0.922	2.2127e-07
IFITM1	1.57931e-11	0.442115	0.533	0.257	2.33027e-07
SPARC	1.69181e-11	0.353871	1	0.724	2.49626e-07
TSPO	1.74259e-11	-0.500232	0.526	0.795	2.57119e-07
DSC3	1.74754e-11	-0.657763	0.459	0.705	2.57849e-07
PRRX1	1.76745e-11	0.506457	0.719	0.427	2.60788e-07
COL3A1	1.82743e-11	0.430549	1	0.918	2.69637e-07
MIF	2.02839e-11	-0.485563	0.474	0.805	2.99288e-07
PERP	2.31183e-11	-0.486573	0.963	0.986	3.4111e-07
NR4A1	2.78695e-11	0.624419	0.689	0.391	4.11215e-07
NID1	2.80673e-11	0.279684	0.304	0.1	4.14134e-07
SERPING1	3.29341e-11	0.38608	0.437	0.186	4.85942e-07
ESAM	3.29688e-11	0.303557	0.259	0.078	4.86455e-07
PRSS23	3.38346e-11	0.510328	0.533	0.269	4.9923e-07
TUBA4A	3.72803e-11	-0.525732	0.541	0.787	5.50071e-07
OLFML2B	3.83506e-11	0.302726	0.348	0.126	5.65864e-07
CSTB	5.2315e-11	-1.18756	1	1	7.71908e-07
KLF9	5.69969e-11	0.268951	0.378	0.143	8.40989e-07
APP	5.85525e-11	0.535308	0.763	0.52	8.63942e-07
PGD	6.11389e-11	-0.523287	0.481	0.738	9.02105e-07
EPPK1	6.39395e-11	-0.740784	0.615	0.794	9.43427e-07
B2M	7.60493e-11	0.463242	1	0.986	1.12211e-06
DSC2	8.73762e-11	-0.560837	0.926	0.965	1.28924e-06
PCOLCE	9.02209e-11	0.388905	0.867	0.523	1.33121e-06
KANK2	1.01892e-10	0.278709	0.326	0.115	1.50342e-06
TBX2	1.05627e-10	0.399185	0.319	0.115	1.55853e-06
GBP6	1.33007e-10	-0.583728	0.415	0.681	1.96251e-06
SLC9A3R2	1.33987e-10	0.389166	0.333	0.126	1.97697e-06
KRT16	1.40037e-10	-0.5517	1	1	2.06624e-06
TGFBR2	1.40131e-10	0.394837	0.489	0.234	2.06764e-06
SLPI	2.09191e-10	-0.89344	0.533	0.735	3.08662e-06
DKK3	2.19252e-10	0.443428	0.644	0.364	3.23506e-06
XBP1	2.91247e-10	0.507537	0.83	0.611	4.29735e-06
RARRES2	2.93609e-10	0.382955	0.489	0.227	4.3322e-06
SERPINB13	3.06697e-10	-0.778797	0.43	0.686	4.52531e-06
AHNAK	3.17212e-10	0.388588	0.993	0.987	4.68046e-06
RGS3	4.02444e-10	0.324636	0.356	0.142	5.93806e-06
GRASP	4.34013e-10	0.312693	0.341	0.131	6.40386e-06
ARAP3	4.78727e-10	0.298438	0.215	0.062	7.06361e-06
TXN	5.34143e-10	-0.578858	0.874	0.935	7.88129e-06
PSAP	5.49194e-10	0.362359	0.941	0.945	8.10335e-06
MYH14	8.10801e-10	-0.616822	0.415	0.662	1.19634e-05
KLK11	8.4376e-10	-0.640976	0.481	0.706	1.24497e-05
LAMC1	1.02239e-09	0.458815	0.578	0.338	1.50854e-05
SDC1	1.06976e-09	-0.433025	0.807	0.954	1.57843e-05
ENTPD1	1.42757e-09	0.283727	0.319	0.121	2.10637e-05
IGHV6-1	1.45137e-09	0.394837	0.326	0.13	2.1415e-05
MFAP4	1.45888e-09	0.296236	0.459	0.209	2.15257e-05
PODN	1.51999e-09	0.294621	0.289	0.104	2.24275e-05
LBH	1.63759e-09	0.402403	0.363	0.159	2.41626e-05
TXNDC5	1.79612e-09	0.495342	0.667	0.448	2.65017e-05
CCN2	1.80375e-09	0.503106	0.474	0.236	2.66143e-05
ANXA5	1.86371e-09	0.353898	0.63	0.35	2.7499e-05
GLTP	1.86847e-09	-0.743374	0.452	0.702	2.75693e-05
IGLV3-1	2.49913e-09	1.22428	0.526	0.272	3.68747e-05
ABLIM1	2.7716e-09	-0.531218	0.459	0.681	4.0895e-05
CALD1	2.80077e-09	0.506254	0.674	0.439	4.13253e-05
CRIP1	2.87134e-09	0.476701	0.726	0.48	4.23666e-05
TIMP2	3.28223e-09	0.372765	0.748	0.467	4.84292e-05
EPS8L2	3.3366e-09	-0.492513	0.467	0.707	4.92316e-05
ARGLU1	3.82168e-09	0.408017	0.919	0.799	5.63889e-05
P4HB	3.83709e-09	-0.360801	0.622	0.842	5.66162e-05
MPZ	3.96886e-09	0.721854	0.244	0.083	5.85605e-05
TPM1	4.85719e-09	0.426612	0.43	0.207	7.16678e-05
OLFML2A	5.3946e-09	0.339593	0.319	0.131	7.95973e-05
RASD1	5.7683e-09	0.277043	0.37	0.155	8.51113e-05
HSPA1B	5.76857e-09	-0.440321	0.526	0.779	8.51153e-05
KRT5	5.9728e-09	-0.498075	1	0.995	8.81286e-05
PLPP3	7.07394e-09	0.325463	0.57	0.307	0.000104376
MZB1	7.19923e-09	0.370728	0.378	0.164	0.000106225
KLF4	7.52849e-09	-0.423886	0.726	0.869	0.000111083
IGHG3	8.02025e-09	0.675455	0.681	0.426	0.000118339
NECTIN1	8.23603e-09	-0.445152	0.444	0.679	0.000121523
A4GALT	8.26237e-09	0.290147	0.341	0.141	0.000121911
SYNE3	9.90074e-09	0.29629	0.281	0.108	0.000146085
COL14A1	1.10063e-08	0.337865	0.622	0.345	0.000162398
C6orf132	1.14595e-08	-0.483127	0.481	0.701	0.000169085
SERPINF1	1.22953e-08	0.32213	0.578	0.312	0.000181417
A2ML1	1.34035e-08	-0.735575	0.422	0.664	0.000197769
COL6A3	1.43846e-08	0.381579	0.733	0.445	0.000212245
ARL4C	1.46298e-08	-0.402223	0.126	0.368	0.000215863
BCAM	1.51086e-08	0.42137	0.481	0.258	0.000222928
ACE	1.54466e-08	0.275196	0.193	0.058	0.000227914
FN1	1.66249e-08	0.369197	0.733	0.432	0.0002453
TACC2	1.81806e-08	-0.453502	0.281	0.516	0.000268255
TUBB2A	1.99211e-08	-0.591069	0.393	0.592	0.000293935
IFI6	2.43537e-08	0.547437	0.741	0.578	0.000359338
EPHX1	2.44122e-08	0.393106	0.452	0.239	0.000360202
GSTP1	2.69596e-08	-0.396516	0.948	0.982	0.000397789
MAPK13	3.06411e-08	-0.478022	0.23	0.464	0.00045211
IFFO2	3.2724e-08	-0.69525	0.296	0.499	0.000482842
CAVIN3	3.74987e-08	0.32948	0.385	0.185	0.000553293
SPRY1	4.23945e-08	0.259955	0.333	0.143	0.000625531
SELENOM	4.25169e-08	0.322147	0.474	0.244	0.000627337
EHD2	4.41119e-08	0.37936	0.6	0.37	0.000650871
ZNF185	4.64304e-08	-0.490741	0.333	0.58	0.000685081
CBR1	5.53986e-08	-0.523809	0.489	0.689	0.000817406
IVL	5.61787e-08	-0.792879	0.763	0.851	0.000828917
SPINT2	6.09613e-08	-0.438692	0.57	0.782	0.000899484
CRABP2	6.48423e-08	-0.483151	0.548	0.761	0.000956748
CRIM1	6.73965e-08	0.377108	0.526	0.303	0.000994436
BGN	7.2015e-08	0.385513	0.615	0.377	0.00106258
HLA-A	7.66753e-08	0.343235	0.97	0.866	0.00113134
DBI	7.72904e-08	-0.443611	0.659	0.85	0.00114042
AQP3	1.08771e-07	-0.501719	0.919	0.967	0.00160491
DUOXA1	1.18923e-07	-0.43388	0.296	0.52	0.0017547
IGHJ6	1.21276e-07	0.269141	0.296	0.122	0.00178943
SBSN	1.28139e-07	-0.835578	0.926	0.931	0.00189069
BICD2	1.31156e-07	-0.370842	0.585	0.804	0.00193521
ELL2	1.35163e-07	-0.375372	0.489	0.745	0.00199433
C3	1.37912e-07	0.321466	0.237	0.089	0.00203489
PPP1CB	1.40914e-07	-0.449169	0.363	0.579	0.00207918
ZEB2	1.4287e-07	0.295321	0.326	0.147	0.00210804
FKBP10	1.44309e-07	0.277178	0.481	0.248	0.00212928
FMOD	1.46587e-07	0.310905	0.615	0.362	0.00216289
LGALSL	1.51255e-07	-0.591854	0.319	0.525	0.00223176
HOOK1	1.71754e-07	-0.310607	0.081	0.294	0.00253423
CDH1	1.8492e-07	-0.398646	0.237	0.473	0.0027285
CD24	2.04354e-07	-0.609142	0.407	0.594	0.00301524
CITED4	2.09408e-07	-0.522875	0.23	0.448	0.00308981
CSGALNACT1	2.18913e-07	0.251189	0.319	0.142	0.00323006
SELE	2.29386e-07	0.262788	0.17	0.052	0.0033846
MYO15B	2.40631e-07	0.31587	0.444	0.233	0.00355051
ALDH3A1	2.44806e-07	-0.504229	0.422	0.629	0.00361212
SPRR1B	3.67159e-07	-0.766431	0.481	0.638	0.00541743
LTBP4	3.85209e-07	0.472913	0.689	0.512	0.00568376
FAM83H	3.96574e-07	-0.410961	0.296	0.519	0.00585145
GIPC1	4.07064e-07	-0.369183	0.489	0.701	0.00600623
ARHGEF4	4.63742e-07	-0.444668	0.378	0.571	0.00684252
TIMP1	5.09094e-07	0.314613	0.511	0.295	0.00751168
CBX6	6.04051e-07	0.292005	0.452	0.25	0.00891278
EHF	6.5405e-07	-0.393182	0.467	0.663	0.00965051
INAVA	6.56698e-07	-0.341419	0.156	0.367	0.00968959
TP63	6.75533e-07	-0.466754	0.363	0.551	0.00996748
GAS6	7.17221e-07	0.279572	0.444	0.241	0.0105826
ZFP36L2	7.24119e-07	0.339391	0.748	0.573	0.0106844
FOXE1	7.45385e-07	-0.394213	0.252	0.45	0.0109982
C1orf116	7.57002e-07	-0.477545	0.119	0.327	0.0111696
HOPX	7.87549e-07	-0.934767	0.711	0.852	0.0116203
SQSTM1	8.76926e-07	0.344372	0.837	0.829	0.012939
CLDN4	9.07656e-07	-0.551171	0.133	0.334	0.0133925
ARPC2	9.3205e-07	-0.360627	0.6	0.815	0.0137524
CLIC4	1.02257e-06	0.277259	0.348	0.176	0.015088
B4GALNT3	1.05119e-06	-0.326381	0.096	0.29	0.0155103
MCL1	1.05822e-06	0.329191	0.911	0.877	0.015614
CPXM1	1.06682e-06	0.282307	0.393	0.203	0.0157409
ZNF750	1.08481e-06	-0.464053	0.304	0.513	0.0160064
TTC22	1.13342e-06	-0.272348	0.104	0.308	0.0167237
FNDC3B	1.17708e-06	0.315196	0.467	0.273	0.0173678
SLC9A3R1	1.19201e-06	-0.412937	0.593	0.79	0.0175881
HBA2	1.26178e-06	0.585201	0.252	0.101	0.0186176
ARL4D	1.26988e-06	-0.314099	0.111	0.311	0.0187371
RAB25	1.36723e-06	-0.424712	0.252	0.46	0.0201735
ESRP1	1.44594e-06	-0.359386	0.237	0.452	0.0213348
CSTA	1.47786e-06	-0.817263	0.867	0.912	0.0218058
TSC22D3	1.53073e-06	0.351274	0.719	0.504	0.0225859
CCN1	1.59933e-06	0.276485	0.533	0.308	0.0235982
UTRN	1.69429e-06	0.263803	0.311	0.15	0.0249992
CST3	1.7332e-06	0.340855	0.889	0.899	0.0255733
S100A2	1.88582e-06	-0.709736	0.867	0.874	0.0278253
COX6A1	1.93427e-06	-0.331951	0.437	0.659	0.0285401
CDC42EP5	1.95507e-06	0.253364	0.333	0.164	0.0288471
TMPRSS11E	2.04551e-06	-0.851746	0.074	0.251	0.0301815
ID3	2.05498e-06	0.451976	0.622	0.442	0.0303212
EXPH5	2.06233e-06	-0.34943	0.185	0.384	0.0304297
TENT5B	2.1294e-06	-0.348464	0.193	0.39	0.0314193
RHOV	2.64515e-06	-0.407552	0.274	0.467	0.0390292
NEURL1B	2.67658e-06	0.259429	0.333	0.167	0.039493
IMPA2	3.05098e-06	-0.413144	0.296	0.488	0.0450172
DHCR24	3.1027e-06	-0.382442	0.281	0.489	0.0457804
IPPK	3.19479e-06	-0.337876	0.207	0.405	0.0471391
PDZK1IP1	3.36003e-06	-0.440606	0.126	0.311	0.0495772
FGFR3	3.6408e-06	-0.439693	0.274	0.447	0.0537201
NFIB	3.71297e-06	0.279054	0.415	0.232	0.0547849
PHLDB1	3.73069e-06	0.285062	0.422	0.237	0.0550463
ZBTB7B	4.07473e-06	-0.380973	0.304	0.49	0.0601226
CD81	4.50114e-06	0.32979	0.726	0.576	0.0664143
FAM83G	4.72651e-06	-0.479197	0.378	0.549	0.0697397
EIF4G2	4.97583e-06	-0.296479	0.711	0.859	0.0734184
CYP2C18	5.26628e-06	-0.266165	0.044	0.21	0.077704
FXYD3	5.29269e-06	-0.403357	0.37	0.552	0.0780936
ANKRD10	5.38075e-06	0.295126	0.467	0.281	0.079393
SPTAN1	5.78451e-06	0.321316	0.57	0.379	0.0853504
SCD	5.78515e-06	-0.395923	0.141	0.319	0.08536
COL5A1	5.78783e-06	0.299117	0.563	0.348	0.0853994
PROM2	6.42654e-06	-0.355691	0.363	0.555	0.0948237
CDA	6.71887e-06	-0.403236	0.052	0.212	0.0991369
MAP1B	7.2177e-06	0.257638	0.481	0.278	0.106497
RAET1E	7.24489e-06	-0.294046	0.067	0.234	0.106898
SDR16C5	7.32366e-06	-0.390663	0.156	0.34	0.108061
NMU	7.35377e-06	-0.301499	0.096	0.273	0.108505
GRHL3	7.63115e-06	-0.489581	0.289	0.465	0.112598
GM2A	8.4098e-06	-0.541231	0.319	0.513	0.124087
PPDPF	8.9175e-06	-0.295349	0.867	0.956	0.131578
IFI27	9.60524e-06	-0.273393	0.956	0.972	0.141725
SH3BGRL3	1.05345e-05	-0.335639	0.452	0.656	0.155437
KCNK6	1.10512e-05	-0.252485	0.089	0.262	0.163061
TLN1	1.11679e-05	0.309322	0.459	0.29	0.164782
DUOX1	1.20598e-05	-0.380107	0.341	0.517	0.177942
RHOD	1.33229e-05	-0.373	0.222	0.41	0.196579
LTB4R	1.33658e-05	-0.389634	0.519	0.668	0.197212
CHMP4C	1.40441e-05	-0.347065	0.067	0.224	0.20722
EPGN	1.43588e-05	-0.273277	0.059	0.215	0.211864
QKI	1.66238e-05	0.345586	0.726	0.603	0.245283
CLCA2	1.69038e-05	-0.367046	0.259	0.431	0.249416
ABCA8	1.70347e-05	0.319515	0.296	0.152	0.251346
EPAS1	1.74228e-05	0.276656	0.452	0.265	0.257074
IER2	1.7674e-05	0.348569	0.756	0.662	0.26078
HDAC7	1.79446e-05	0.300143	0.496	0.319	0.264773
CCDC85C	1.80373e-05	-0.254012	0.111	0.286	0.26614
WFS1	1.87622e-05	0.274976	0.259	0.126	0.276836
KLK10	1.93153e-05	-0.927925	0.519	0.7	0.284998
SERPINB2	1.98612e-05	-0.344713	0.044	0.189	0.293052
GJB6	2.00495e-05	-0.567746	0.237	0.395	0.295831
LAMA5	2.16302e-05	0.284125	0.644	0.449	0.319153
ALDH3B2	2.18895e-05	-0.291004	0.119	0.295	0.322979
RAB11A	2.23631e-05	-0.370996	0.319	0.499	0.329967
LTBP3	2.25897e-05	0.320008	0.6	0.422	0.333311
CYSRT1	2.27568e-05	-0.48511	0.111	0.269	0.335777
SLC16A9	2.46561e-05	-0.321603	0.17	0.344	0.3638
MPZL2	2.49818e-05	-0.402098	0.533	0.681	0.368607
CD99	2.62364e-05	0.294325	0.793	0.674	0.387118
MLLT6	2.78908e-05	0.250322	0.63	0.417	0.411529
DLG1	2.91952e-05	-0.277685	0.178	0.352	0.430775
GNAS	2.93018e-05	0.264193	0.852	0.865	0.432349
CNN3	2.97218e-05	0.255991	0.459	0.271	0.438545
ID4	3.14603e-05	0.339085	0.57	0.391	0.464197
EPHX3	3.23177e-05	-0.29596	0.059	0.207	0.476848
TACC1	3.37878e-05	0.300609	0.393	0.24	0.498539
PPL	3.40614e-05	-0.73786	0.793	0.893	0.502576
RORA	3.45266e-05	-0.342326	0.244	0.416	0.50944
CELSR2	3.66749e-05	-0.267946	0.17	0.352	0.541138
HIST1H1B	3.8018e-05	-0.537827	0.207	0.365	0.560956
GPX4	4.14963e-05	0.279023	0.681	0.478	0.612278
SPINK5	4.34192e-05	-0.875629	0.719	0.813	0.640651
EIF6	4.34367e-05	-0.297027	0.348	0.515	0.640908
ABCC5	4.40911e-05	-0.3007	0.237	0.413	0.650564
SDR9C7	4.63011e-05	-0.336988	0.052	0.193	0.683173
ALOX12	4.66618e-05	-0.876564	0.119	0.27	0.688494
CLIC3	4.723e-05	-0.683217	0.237	0.388	0.696879
PI3	4.73997e-05	-0.8165	0.119	0.269	0.699383
CERS3	4.83932e-05	-0.353268	0.2	0.362	0.714041
BNIPL	4.96728e-05	-0.306254	0.267	0.445	0.732923
ALDH3A2	5.00758e-05	-0.304505	0.519	0.692	0.738868
SPRR2A	5.3974e-05	-0.940228	1	0.956	0.796387
DEF6	5.42023e-05	-0.286093	0.163	0.323	0.799755
PDLIM4	5.51601e-05	-0.269526	0.156	0.324	0.813887
HOMER2	5.82197e-05	-0.350408	0.17	0.331	0.859031
POF1B	6.02304e-05	-0.610041	0.2	0.361	0.888699
BICDL2	6.19544e-05	-0.328729	0.104	0.251	0.914138
MUSTN1	6.21154e-05	0.266438	0.23	0.112	0.916513
BDH1	6.28335e-05	-0.338981	0.207	0.371	0.927108
SPRR3	6.34939e-05	-1.3457	1	0.944	0.936852
DDX17	6.75001e-05	0.27765	0.867	0.843	0.995963
GRHL1	6.76668e-05	-0.510029	0.23	0.368	0.998423
WDR26	6.84908e-05	-0.332591	0.23	0.39	1
PLA2G4F	7.02495e-05	-0.32908	0.148	0.305	1
LY6D	7.20778e-05	-0.406029	0.881	0.897	1
ZFP36	8.19569e-05	0.342453	0.785	0.698	1
CPEB4	8.36739e-05	-0.252753	0.081	0.225	1
DYNLT3	8.40273e-05	-0.267946	0.185	0.347	1
LGALS7	8.89016e-05	-0.307651	0.141	0.293	1
SAT1	8.90762e-05	0.367627	0.726	0.612	1
THEM5	9.20908e-05	-0.38891	0.111	0.254	1
EFNA3	9.30023e-05	-0.312373	0.163	0.314	1
MXD1	9.62594e-05	-0.566924	0.178	0.324	1
LENG8	9.67827e-05	0.276554	0.793	0.689	1
IL20RB	9.84777e-05	-0.265547	0.237	0.407	1
MBD2	9.97727e-05	-0.286104	0.356	0.527	1
ZDHHC13	9.99769e-05	-0.29707	0.096	0.241	1
NAA20	0.000100177	-0.268425	0.237	0.408	1
TMEM54	0.000103767	-0.314879	0.222	0.377	1
MAL2	0.000105643	-0.383995	0.393	0.527	1
TMEM40	0.000111622	-0.402876	0.215	0.358	1
SEMA4B	0.000114177	-0.356445	0.363	0.51	1
EID1	0.000118435	0.28568	0.607	0.451	1
ANKRD35	0.000119611	-0.378875	0.267	0.42	1
SCNN1A	0.000119964	-0.316893	0.104	0.246	1
MAF	0.000120731	-0.286403	0.867	0.906	1
DNAJB1	0.000122012	-0.316902	0.504	0.635	1
MPZL3	0.000124313	-0.272526	0.089	0.23	1
TP53AIP1	0.000124346	-0.398907	0.222	0.36	1
KIAA1522	0.000137869	-0.33023	0.326	0.476	1
IL36RN	0.000140081	-0.622035	0.119	0.258	1
SYTL1	0.000140822	-0.314959	0.341	0.491	1
IGHM	0.000144478	0.670213	0.319	0.182	1
HEBP2	0.000145701	-0.292044	0.407	0.572	1
IL1RN	0.000149181	-0.65092	0.844	0.903	1
FAM83C	0.00014994	-0.273446	0.119	0.264	1
IP6K2	0.000151718	-0.353833	0.326	0.456	1
PLXNB1	0.00015531	-0.324749	0.333	0.494	1
MARCKS	0.000155994	0.267299	0.933	0.861	1
ENDOU	0.000160519	-0.308469	0.119	0.267	1
EZR	0.000166245	-0.28497	0.378	0.559	1
PLEKHN1	0.00017893	-0.259326	0.156	0.301	1
FAM110C	0.000180349	-0.291273	0.17	0.324	1
SLC6A9	0.000181366	-0.267946	0.148	0.301	1
CD36	0.00018354	-0.273995	0.037	0.155	1
CEBPA	0.000190988	-0.351351	0.222	0.364	1
HRAS	0.000195724	-0.271713	0.252	0.412	1
SPRR2F	0.000201212	-0.436582	0.022	0.132	1
CAV1	0.000201894	0.250674	0.296	0.17	1
KLK13	0.000206736	-0.869528	0.526	0.637	1
PRSS8	0.000207214	-0.307927	0.133	0.28	1
VSNL1	0.000210765	-0.293234	0.178	0.322	1
TUFT1	0.000211183	-0.260501	0.156	0.306	1
MYH9	0.000216522	0.293448	0.822	0.745	1
PDLIM2	0.000217999	-0.274532	0.244	0.402	1
FLG	0.000219397	-0.525312	0.104	0.236	1
SERPINB11	0.000219975	-0.530443	0.163	0.291	1
PLEC	0.000237235	0.262205	0.867	0.834	1
PPP1R14C	0.000252524	-0.257122	0.23	0.39	1
RAPGEFL1	0.000258111	-0.300358	0.326	0.463	1
MFGE8	0.000259369	0.294696	0.504	0.356	1
FAM3D	0.000263013	-0.256993	0.037	0.15	1
FUT6	0.000268628	-0.336299	0.015	0.116	1
HIST1H3D	0.000275555	-0.303243	0.111	0.246	1
IGFBP2	0.000286438	-0.314982	0.585	0.715	1
SPINT1	0.000287505	-0.292693	0.319	0.487	1
RAB10	0.000295744	-0.299269	0.363	0.503	1
SDCBP2	0.000298476	-0.317774	0.126	0.261	1
PITPNA	0.000305127	-0.298154	0.541	0.7	1
ACAP3	0.000306695	-0.327143	0.533	0.642	1
HSPB8	0.000318411	-0.322752	0.141	0.278	1
KLK8	0.000326145	-0.34107	0.126	0.26	1
VAMP8	0.000327591	-0.274857	0.341	0.484	1
KLK7	0.000327751	-0.91236	0.341	0.455	1
PLEKHG3	0.000331489	-0.265768	0.141	0.277	1
ANKRD13D	0.000338811	-0.262779	0.267	0.412	1
PA2G4	0.000350007	-0.258226	0.378	0.524	1
GRHL2	0.00035105	-0.270455	0.207	0.354	1
SLC47A2	0.000364991	-0.330114	0.244	0.378	1
UGCG	0.000367395	-0.358401	0.156	0.289	1
SLC2A1	0.000369328	-0.291329	0.244	0.393	1
CLIP4	0.00039505	-0.28102	0.215	0.353	1
CYP4F22	0.000407708	-0.415189	0.096	0.22	1
HIST1H3I	0.000412326	-0.252274	0.081	0.206	1
CPEB2	0.000420321	-0.338396	0.356	0.488	1
CLCA4	0.000442531	-0.421292	0.03	0.133	1
CEBPD	0.000446005	0.313427	0.6	0.503	1
TGM7	0.000536614	-0.312322	0.059	0.174	1
KANK1	0.000556854	-0.255771	0.156	0.293	1
CD44	0.000570434	-0.299824	0.948	0.923	1
YWHAG	0.000573369	-0.25631	0.444	0.578	1
C10orf99	0.000582672	-0.321603	0.185	0.312	1
WSB1	0.000587453	0.262429	0.578	0.451	1
CIRBP	0.000594898	0.255749	0.837	0.826	1
RHCG	0.000629115	-0.973992	0.681	0.762	1
PLP2	0.00063408	-0.287586	0.363	0.493	1
GJA1	0.000670978	-0.424866	0.748	0.832	1
PGLYRP3	0.000688664	-0.317787	0.17	0.299	1
LCN2	0.000704232	-0.595521	0.059	0.168	1
H1FX	0.000724006	0.270884	0.652	0.498	1
SLC7A1	0.000726646	-0.302759	0.215	0.345	1
MAL	0.000776694	-1.31079	0.593	0.646	1
ATP13A4	0.00078238	-0.314563	0.193	0.316	1
KLK6	0.000789725	-0.464885	0.067	0.18	1
SULT2B1	0.000826373	-0.472614	0.267	0.381	1
PIM1	0.000827918	-0.560359	0.296	0.399	1
DERL3	0.000831978	0.280744	0.237	0.13	1
OAZ2	0.0008443	0.278744	0.407	0.278	1
KRT1	0.000853091	-0.946139	0.993	0.861	1
CAMSAP3	0.000894375	-0.251091	0.156	0.28	1
F3	0.000896489	-0.489672	0.289	0.399	1
NBEAL2	0.000908559	-0.309388	0.437	0.533	1
PRDM1	0.000929203	-0.368442	0.133	0.258	1
S100A10	0.000941977	-0.286054	0.852	0.892	1
TGM3	0.00096634	-0.967666	0.889	0.878	1
TMPRSS11A	0.000987241	-0.276663	0.2	0.323	1
BAG1	0.00100053	-0.258658	0.4	0.534	1
SH3RF2	0.0010056	-0.262501	0.319	0.455	1
TTC9	0.00103554	-0.408809	0.133	0.25	1
INF2	0.00103934	0.251648	0.593	0.455	1
LYPD2	0.00109625	-0.296753	0.037	0.133	1
PRKX	0.00120188	-0.253974	0.244	0.37	1
IVNS1ABP	0.00120215	-0.278821	0.452	0.573	1
FMO2	0.00132085	-0.43287	0.119	0.23	1
PDCD4	0.00135152	-0.285988	0.348	0.468	1
EFS	0.0013793	-0.254225	0.237	0.364	1
TMOD3	0.00140629	-0.256454	0.37	0.528	1
KLK5	0.00141028	-0.251114	0.052	0.151	1
RHOB	0.00142198	0.270739	0.711	0.62	1
GOLGA7B	0.00142568	-0.252892	0.126	0.24	1
NABP1	0.00144292	-0.291299	0.141	0.257	1
PLA2G4D	0.00149806	-0.660611	0.111	0.219	1
SPRR2D	0.00153464	-1.23907	0.837	0.821	1
TGM6	0.00154862	-0.540437	0.141	0.255	1
PPIF	0.00157697	-0.589066	0.252	0.375	1
AVPI1	0.00159558	-0.280019	0.119	0.233	1
DEGS1	0.00159589	-0.272359	0.281	0.409	1
TYMP	0.00161191	-0.294357	0.548	0.688	1
MBOAT2	0.00165114	-0.275139	0.119	0.23	1
TMEM45A	0.00177132	-0.352436	0.133	0.248	1
METRNL	0.00179456	-0.367044	0.644	0.721	1
KIF1C	0.00180134	-0.274389	0.289	0.405	1
TMPRSS11B	0.00190091	-0.909164	0.244	0.349	1
NUPR1	0.00192545	-0.259322	0.422	0.552	1
NFE2L2	0.00192844	-0.301556	0.57	0.675	1
CDKN1A	0.00192993	-0.291724	0.407	0.522	1
KRT3	0.00196066	-0.694031	0.511	0.595	1
CEACAM5	0.00198392	-0.330509	0.074	0.175	1
MAB21L4	0.00200142	-0.263473	0.119	0.229	1
RASAL1	0.00202625	-0.288592	0.119	0.226	1
HMGCR	0.00210767	-0.267946	0.148	0.263	1
PRDX5	0.00212794	-0.251398	0.356	0.466	1
ELOVL4	0.00230738	-0.434454	0.178	0.285	1
NSG1	0.00240976	-0.306624	0.333	0.434	1
OCLN	0.00270514	-0.349346	0.111	0.213	1
DCUN1D3	0.00271025	-0.292232	0.104	0.206	1
COL17A1	0.00278699	-0.587471	0.719	0.775	1
FAT2	0.00286248	-0.252433	0.311	0.435	1
DYNLL1	0.0030203	-0.25229	0.444	0.537	1
ATP1B1	0.00307137	-0.449053	0.2	0.307	1
PLBD1	0.00321794	-0.291686	0.126	0.231	1
DSC1	0.0033528	-0.469334	0.111	0.209	1
CRYAB	0.00340586	-0.401059	0.422	0.52	1
SCEL	0.00347298	-0.597088	0.444	0.522	1
MALL	0.00361068	-0.294374	0.23	0.341	1
RMND5A	0.00362336	-0.279343	0.259	0.364	1
CLDN17	0.00368349	-0.320542	0.044	0.128	1
ANXA9	0.003888	-0.263727	0.037	0.119	1
NUCB1	0.00398077	0.260456	0.563	0.484	1
RAB5A	0.00411748	-0.321194	0.341	0.437	1
KRT23	0.00423245	-0.41983	0.052	0.135	1
KLK14	0.00457948	-0.458569	0.089	0.18	1
NCCRP1	0.00459451	-0.732457	0.281	0.365	1
BTG3	0.00459494	-0.254625	0.319	0.42	1
TGM5	0.00464374	-0.321649	0.126	0.22	1
CRYBG1	0.00466549	-0.299128	0.237	0.345	1
AKR1B10	0.00468503	-0.328346	0.348	0.441	1
CRCT1	0.00501721	-1.35387	0.689	0.729	1
S100A3	0.00506725	-0.268523	0.089	0.182	1
CDHR1	0.0052428	-0.254752	0.178	0.285	1
NECTIN4	0.00541213	-0.252365	0.422	0.527	1
S100A7	0.00563887	-1.11009	0.496	0.548	1
KRTDAP	0.00603526	-0.860626	0.852	0.839	1
SLURP2	0.00631946	-0.525675	0.296	0.39	1
TGM1	0.00654815	-0.640612	0.311	0.38	1
ATG9B	0.00713372	-0.303027	0.044	0.12	1
PPP1R3C	0.00752702	-0.27876	0.2	0.302	1
VAV3	0.00761851	-0.256034	0.304	0.388	1
PSORS1C2	0.00778808	-0.401034	0.037	0.108	1
CD55	0.00820328	-0.378804	0.4	0.485	1
ATP6V1C2	0.00844689	-0.393857	0.096	0.179	1
KRT10	0.00872085	-0.882652	1	0.898	1
LMO7	0.00897814	-0.45034	0.267	0.367	1
MUC21	0.00902704	-1.12397	0.267	0.356	1
ELF3	0.00927268	-0.364515	0.081	0.163	1
IL36A	0.00963748	-0.594379	0.141	0.227	1
KLK12	0.00964998	-0.644923	0.274	0.343	1
NIBAN2	0.0105917	-0.270833	0.667	0.808	1
HEPHL1	0.0111379	-0.382314	0.141	0.228	1
CRNN	0.0115466	-1.32655	0.889	0.79	1
KRT80	0.0117413	-0.870113	0.437	0.495	1
CNFN	0.0130656	-1.08581	0.896	0.83	1
ERO1A	0.0138474	-0.652387	0.222	0.312	1
ANXA1	0.0152063	-0.758973	1	0.987	1
EPS8L1	0.0154833	-0.493133	0.148	0.222	1
GPRC5A	0.0162981	-0.304185	0.096	0.171	1
CLDN7	0.0164639	-0.388755	0.185	0.263	1
CALML5	0.0164792	-0.97799	0.348	0.422	1
SLURP1	0.0169681	-0.667227	0.267	0.328	1
CRIP2	0.0175463	0.27635	0.533	0.454	1
TPPP3	0.0181976	-0.339845	0.319	0.39	1
KRT78	0.0193396	-1.24159	0.474	0.495	1
CLDN1	0.0199476	-0.320138	0.311	0.388	1
CPA4	0.0203731	-0.287055	0.104	0.178	1
RNF225	0.021202	-0.459397	0.148	0.227	1
MYC	0.021801	-0.345554	0.837	0.83	1
SPINK7	0.0222012	-1.1097	0.622	0.646	1
TREX2	0.0227584	-0.327482	0.089	0.159	1
MAP1LC3A	0.0229693	-0.325971	0.222	0.296	1
IL36G	0.0233179	-0.545946	0.2	0.28	1
UBC	0.024155	-0.250159	1	1	1
YOD1	0.0248721	-0.34509	0.119	0.19	1
GPX3	0.0257198	-0.496125	0.333	0.392	1
IGFBP3	0.0259985	0.517962	0.326	0.253	1
VSIG10L	0.0260398	-0.299158	0.141	0.212	1
SERPINB1	0.0260659	-0.396692	0.2	0.27	1
DUSP14	0.0265463	-0.27701	0.207	0.286	1
DMKN	0.0269047	-0.466834	0.43	0.484	1
LYPD5	0.0304851	-0.376707	0.096	0.164	1
WFDC5	0.0322618	-0.355603	0.119	0.187	1
ALOX12B	0.0340195	-0.579407	0.2	0.267	1
ECM1	0.0468156	-0.55223	0.252	0.32	1
LCE3E	0.0477377	-0.730238	0.163	0.222	1
KRT13	0.0482837	-0.664928	1	0.972	1
ABCA12	0.0570268	-0.263116	0.222	0.284	1
KPRP	0.0588371	-0.262595	0.059	0.109	1
PRSS27	0.0646819	-0.581363	0.252	0.297	1
WFDC12	0.0727058	-0.444487	0.126	0.18	1
EMP1	0.080058	-0.746034	0.815	0.866	1
LCE2C	0.0827754	-0.34931	0.081	0.13	1
CDSN	0.110421	-1.2126	0.363	0.404	1
SPRR2B	0.113249	-0.252057	0.067	0.108	1
FAM43A	0.115329	-0.335547	0.378	0.403	1
GSDMA	0.121366	-0.334069	0.096	0.139	1
LOR	0.154303	-1.29621	0.785	0.753	1
CXCL14	0.16355	-0.371654	0.963	0.861	1
QSOX1	0.164786	-0.276006	0.378	0.416	1
TNS4	0.167047	-0.26021	0.452	0.451	1
ASPRV1	0.203602	-0.799186	0.178	0.214	1
C15orf48	0.233853	-0.464035	0.148	0.18	1
GLUL	0.253812	-0.301334	0.763	0.753	1
H1F0	0.362149	-0.26433	0.319	0.323	1
TP53INP2	0.398384	-0.281867	0.274	0.286	1
SPNS2	0.416194	-0.284455	0.296	0.241	1
LCE3D	0.493425	-1.18924	0.533	0.501	1
KRT4	0.628105	-1.39052	0.844	0.736	1
KRT2	0.658481	-0.83747	0.4	0.363	1
CCER2	0.793627	-0.913968	0.215	0.205	1
SPRR2G	0.842971	-0.975255	0.956	0.813	1
RPTN	0.87701	-0.940822	0.437	0.393	1

## Sheet: A1 - region2
	p_val	avg_log2FC	pct.1	pct.2	p_val_adj
JCHAIN	7.73377e-77	2.64869	0.992	0.338	1.14112e-72
IGHA1	2.08634e-67	2.89814	1	0.699	3.07839e-63
MZB1	2.04423e-66	1.26619	0.725	0.117	3.01627e-62
IGKC	1.24104e-65	3.07997	1	1	1.83115e-61
IGHG4	1.82154e-64	2.87227	0.977	0.332	2.68768e-60
IGLV3-1	4.72161e-61	2.04722	0.863	0.227	6.96674e-57
IGLC1	1.17344e-60	2.56184	1	0.611	1.73141e-56
IGHG3	5.49314e-60	2.50364	0.954	0.39	8.10512e-56
IGHG2	1.07578e-59	2.48258	1	0.737	1.58732e-55
CD79A	6.58377e-56	1.1166	0.573	0.079	9.71435e-52
CXCR4	1.2593e-55	1.04783	0.58	0.084	1.85809e-51
IGHG1	1.53069e-55	2.40268	1	0.606	2.25853e-51
TENT5C	2.75932e-54	1.0481	0.58	0.086	4.07138e-50
RGS1	3.03485e-54	0.788252	0.473	0.047	4.47792e-50
ARHGAP45	1.85884e-51	0.952194	0.496	0.062	2.74272e-47
IGKV4-1	2.45321e-51	1.90762	0.885	0.284	3.61971e-47
IRF4	4.36342e-50	0.660746	0.45	0.046	6.43822e-46
SEPTIN1	4.50189e-48	0.850465	0.481	0.063	6.64254e-44
TRBC1	1.9294e-47	0.896966	0.45	0.052	2.84682e-43
TRBC2	2.04503e-47	0.968394	0.466	0.057	3.01745e-43
DERL3	2.35561e-47	0.902961	0.55	0.088	3.4757e-43
LIMD2	2.61571e-47	0.954992	0.573	0.098	3.85947e-43
CYBA	3.31176e-47	1.28065	0.786	0.242	4.8865e-43
IGHJ6	6.13698e-46	0.847499	0.55	0.088	9.05512e-42
SKAP1	6.38227e-45	0.656997	0.42	0.046	9.41704e-41
IGHM	6.8667e-45	1.08172	0.649	0.137	1.01318e-40
LTB	9.52442e-45	0.829424	0.389	0.039	1.40533e-40
ARHGAP9	1.00985e-44	0.720514	0.489	0.07	1.49004e-40
TBC1D10C	1.11604e-44	0.562744	0.412	0.044	1.64672e-40
LYZ	1.22308e-43	1.3319	0.618	0.133	1.80465e-39
CORO1A	1.43792e-43	1.06094	0.595	0.122	2.12165e-39
RAC2	8.98339e-43	0.586207	0.443	0.056	1.3255e-38
TRAC	9.37609e-43	0.75539	0.397	0.044	1.38344e-38
IL2RG	2.38041e-42	0.743421	0.405	0.047	3.5123e-38
IL32	2.12222e-41	1.21302	0.603	0.135	3.13133e-37
CD37	3.67163e-41	0.66991	0.382	0.042	5.41749e-37
LAPTM5	4.24399e-40	0.95848	0.58	0.125	6.262e-36
HCST	1.56691e-39	0.363002	0.29	0.019	2.31198e-35
CCL19	1.90136e-39	1.32263	0.565	0.119	2.80546e-35
BHLHA15	9.37582e-39	0.400706	0.321	0.027	1.3834e-34
SEL1L3	1.05693e-38	0.482699	0.382	0.044	1.55949e-34
IGLJ1	1.12703e-38	0.364964	0.26	0.014	1.66293e-34
CD74	1.31865e-38	1.70323	0.947	0.502	1.94566e-34
PTPRC	1.96835e-38	0.787712	0.45	0.071	2.90429e-34
TRAF3IP3	2.24651e-38	0.413189	0.313	0.026	3.31473e-34
PIM2	4.38394e-38	0.501173	0.336	0.032	6.4685e-34
XBP1	2.10342e-37	1.65343	0.939	0.597	3.10359e-33
C16orf54	2.53935e-37	0.510498	0.359	0.041	3.7468e-33
ACAP1	4.45061e-37	0.646085	0.389	0.052	6.56687e-33
TXNDC5	7.98103e-37	1.3261	0.855	0.423	1.1776e-32
GMFG	9.89015e-37	0.682104	0.42	0.064	1.45929e-32
TAGAP	1.19293e-36	0.519735	0.397	0.054	1.76016e-32
ITGB2	1.88063e-36	0.615305	0.382	0.05	2.77487e-32
C1QC	3.02323e-36	0.753033	0.534	0.115	4.46077e-32
SLAMF7	4.3042e-36	0.421756	0.351	0.04	6.35085e-32
CCR7	3.34678e-35	0.430927	0.237	0.013	4.93818e-31
FCMR	1.09183e-34	0.436583	0.267	0.02	1.611e-30
CD53	2.15975e-34	0.483158	0.328	0.037	3.18672e-30
TMC8	5.94689e-34	0.586786	0.344	0.043	8.77464e-30
UBD	6.6777e-34	0.435993	0.244	0.016	9.85294e-30
CD28	1.0358e-32	0.270443	0.191	0.006	1.52833e-28
ITGAL	1.03581e-32	0.288477	0.191	0.006	1.52834e-28
SELL	1.4332e-32	0.458823	0.252	0.019	2.11469e-28
SPOCK2	1.59404e-32	0.611341	0.351	0.048	2.352e-28
HERPUD1	2.16008e-32	0.789278	0.702	0.233	3.1872e-28
JAK3	2.29053e-32	0.729445	0.351	0.049	3.37968e-28
IKZF1	1.19315e-31	0.607604	0.389	0.064	1.7605e-27
ARHGAP4	1.76665e-31	0.578977	0.397	0.067	2.60668e-27
CD3E	2.35827e-31	0.407299	0.237	0.017	3.47963e-27
SNX20	2.67481e-31	0.364001	0.267	0.024	3.94669e-27
CXCL13	3.04033e-31	1.49219	0.489	0.112	4.486e-27
ARHGDIB	3.04515e-31	0.865276	0.618	0.182	4.49312e-27
MMP9	3.18046e-31	0.486588	0.237	0.017	4.69277e-27
CD5	4.67821e-31	0.304663	0.221	0.014	6.9027e-27
IGHV6-1	1.24271e-30	1.17296	0.489	0.109	1.83362e-26
LCP1	1.49748e-30	0.721504	0.366	0.059	2.20954e-26
SLA	1.71835e-30	0.438884	0.313	0.039	2.53543e-26
CD69	2.07008e-30	0.448014	0.26	0.024	3.0544e-26
IGHJ2	3.76977e-30	0.438005	0.313	0.039	5.5623e-26
IKZF3	4.50075e-30	0.413189	0.26	0.024	6.64085e-26
UCP2	6.14198e-30	0.420311	0.313	0.04	9.0625e-26
CARMIL2	6.72687e-30	0.32636	0.229	0.017	9.9255e-26
ATP2A3	8.20069e-30	0.596153	0.489	0.112	1.21001e-25
CD247	9.52215e-30	0.356502	0.214	0.014	1.40499e-25
ZC3H12D	1.06294e-29	0.387948	0.237	0.019	1.56837e-25
HLA-DQA1	1.88595e-29	0.716036	0.427	0.087	2.78272e-25
CD27	3.12387e-29	0.395021	0.313	0.041	4.60928e-25
CD3D	3.61121e-29	0.542681	0.305	0.04	5.32833e-25
TPSB2	9.50325e-29	0.794453	0.87	0.355	1.4022e-24
IL10RA	9.78714e-29	0.480597	0.313	0.043	1.44409e-24
STK17B	9.98605e-29	0.844683	0.542	0.148	1.47344e-24
CSF2RA	2.2457e-28	0.357546	0.229	0.019	3.31353e-24
BIRC3	3.53241e-28	0.581038	0.321	0.047	5.21207e-24
IL7R	3.68033e-28	0.686858	0.313	0.045	5.43033e-24
MAP4K1	4.94814e-28	0.366452	0.267	0.029	7.30098e-24
ADA2	5.06993e-28	0.420194	0.336	0.051	7.48068e-24
MYO1G	1.34194e-27	0.359154	0.282	0.034	1.98003e-23
HLA-DRA	1.37488e-27	1.27278	0.695	0.276	2.02864e-23
POU2AF1	1.42938e-27	0.563849	0.351	0.059	2.10906e-23
CHST2	7.49218e-27	0.471581	0.298	0.042	1.10547e-22
MYO1F	1.057e-26	0.358137	0.26	0.029	1.5596e-22
NAIP	1.14318e-26	0.379238	0.321	0.048	1.68677e-22
MPEG1	1.28713e-26	0.342476	0.267	0.031	1.89917e-22
KCNA3	2.33891e-26	0.413899	0.26	0.03	3.45106e-22
RIPOR2	2.56191e-26	0.439773	0.275	0.036	3.78009e-22
FMNL1	3.69708e-26	0.368838	0.321	0.05	5.45503e-22
APOE	4.54612e-26	0.8932	0.771	0.304	6.70779e-22
CD52	5.13819e-26	0.373257	0.252	0.028	7.5814e-22
IL2RB	5.17032e-26	0.328784	0.244	0.026	7.6288e-22
HLA-DOB	6.56582e-26	0.305882	0.237	0.024	9.68787e-22
HCLS1	6.97817e-26	0.573243	0.366	0.072	1.02963e-21
RASGRP2	1.47182e-25	0.361611	0.282	0.039	2.17167e-21
KLHL6	2.18706e-25	0.311443	0.26	0.031	3.22701e-21
AKNA	2.37383e-25	0.619669	0.427	0.101	3.50258e-21
SASH3	2.60653e-25	0.429618	0.282	0.04	3.84593e-21
ETS1	3.14609e-25	0.471617	0.443	0.103	4.64205e-21
ADGRE5	3.37156e-25	0.500413	0.359	0.069	4.97474e-21
LCK	3.97879e-25	0.416825	0.244	0.028	5.87071e-21
HLA-DMA	4.73491e-25	0.542927	0.412	0.093	6.98636e-21
WIPF1	5.19354e-25	0.704523	0.565	0.178	7.66307e-21
ARHGAP25	5.86186e-25	0.348311	0.252	0.03	8.64918e-21
CYTIP	6.3738e-25	0.34793	0.275	0.038	9.40454e-21
RHOH	6.55769e-25	0.264584	0.198	0.016	9.67588e-21
SEC11C	9.28568e-25	0.57617	0.511	0.148	1.3701e-20
WAS	1.31463e-24	0.260143	0.214	0.02	1.93973e-20
RNF166	1.47515e-24	0.427391	0.374	0.075	2.17658e-20
SELPLG	1.52216e-24	0.369831	0.275	0.039	2.24595e-20
IGLC7	1.63461e-24	0.436285	0.221	0.022	2.41186e-20
GBP5	1.68081e-24	0.407348	0.275	0.039	2.48004e-20
CCDC88B	2.90798e-24	0.537392	0.382	0.083	4.29073e-20
HLA-DPB1	3.21836e-24	1.12385	0.603	0.219	4.74869e-20
SPN	9.91608e-24	0.324388	0.244	0.03	1.46312e-19
CCL18	1.14091e-23	0.259844	0.153	0.007	1.68341e-19
GATA3	2.15176e-23	0.254057	0.198	0.018	3.17492e-19
TRIB1	2.69363e-23	0.506382	0.427	0.107	3.97445e-19
JAML	3.30227e-23	0.25719	0.206	0.02	4.8725e-19
TRAJ23	6.93536e-23	0.255539	0.183	0.015	1.02331e-18
TYROBP	8.03575e-23	0.451055	0.298	0.052	1.18567e-18
TESPA1	9.38085e-23	0.252577	0.191	0.017	1.38414e-18
IL16	1.00252e-22	0.479103	0.321	0.062	1.47922e-18
TRAF1	1.13148e-22	0.521539	0.328	0.064	1.6695e-18
HSH2D	1.1419e-22	0.359154	0.244	0.032	1.68488e-18
FCGR2B	1.20042e-22	0.32655	0.282	0.045	1.77122e-18
HLA-DPA1	1.25401e-22	0.693824	0.443	0.121	1.85029e-18
CCL21	2.27197e-22	0.750835	0.366	0.082	3.35229e-18
RASSF4	2.49404e-22	0.713435	0.443	0.12	3.67995e-18
THEMIS2	2.57518e-22	0.437655	0.344	0.07	3.79968e-18
PARVG	3.43365e-22	0.314363	0.229	0.028	5.06635e-18
HLA-C	3.4438e-22	0.802026	0.824	0.47	5.08132e-18
ITM2C	3.70018e-22	0.374187	0.366	0.078	5.45961e-18
GPR183	3.81417e-22	0.289902	0.191	0.018	5.62781e-18
ITK	3.92269e-22	0.261482	0.16	0.01	5.78793e-18
ZBP1	4.11822e-22	0.450614	0.305	0.055	6.07643e-18
VOPP1	4.88305e-22	0.636677	0.473	0.142	7.20495e-18
SRGN	5.12286e-22	0.52203	0.359	0.078	7.55879e-18
HLA-DOA	5.27427e-22	0.278101	0.214	0.024	7.78218e-18
ITGA4	6.01722e-22	0.341021	0.252	0.037	8.87841e-18
VAV1	6.4092e-22	0.349773	0.229	0.029	9.45677e-18
IRF8	1.16156e-21	0.528203	0.26	0.041	1.71388e-17
CLTB	2.05872e-21	-0.755651	0.718	0.933	3.03763e-17
PLEK	3.43488e-21	0.458668	0.29	0.052	5.06817e-17
IGLV6-57	3.49511e-21	0.400131	0.26	0.041	5.15704e-17
CYTH4	3.93846e-21	0.315447	0.26	0.041	5.8112e-17
NCKAP1L	5.29669e-21	0.341705	0.206	0.024	7.81527e-17
ZAP70	5.81732e-21	0.401483	0.229	0.031	8.58346e-17
CD84	6.09239e-21	0.264822	0.221	0.028	8.98932e-17
CTLA4	6.26921e-21	0.28399	0.176	0.016	9.25021e-17
ST6GAL1	6.41848e-21	0.39409	0.336	0.072	9.47047e-17
RNASE1	6.7799e-21	0.46759	0.458	0.13	1.00037e-16
GPSM3	7.58194e-21	0.318341	0.252	0.039	1.11872e-16
CCL5	8.77941e-21	0.436567	0.267	0.045	1.2954e-16
CLEC2D	1.01503e-20	0.543003	0.412	0.114	1.49767e-16
SELENOM	1.07496e-20	0.513077	0.626	0.225	1.5861e-16
LCP2	1.53942e-20	0.402252	0.244	0.038	2.27141e-16
MCL1	2.58267e-20	0.592219	0.977	0.868	3.81074e-16
PAG1	2.71677e-20	0.375339	0.313	0.064	4.00859e-16
EMP3	5.14446e-20	0.495828	0.519	0.173	7.59065e-16
IL27RA	5.29608e-20	0.288368	0.221	0.03	7.81436e-16
ANXA6	7.93034e-20	0.520575	0.489	0.155	1.17012e-15
IDO1	1.0996e-19	0.275001	0.137	0.008	1.62246e-15
PTGDS	1.59731e-19	0.732312	0.947	0.542	2.35684e-15
PARP15	1.66547e-19	0.341361	0.214	0.029	2.4574e-15
CD6	1.69383e-19	0.25719	0.191	0.022	2.49925e-15
FKBP11	1.72164e-19	0.451303	0.435	0.127	2.54029e-15
SERPINB9	1.85977e-19	0.452506	0.305	0.065	2.7441e-15
PTK2B	2.12449e-19	0.381048	0.359	0.088	3.13468e-15
FYB1	2.89819e-19	0.655054	0.275	0.054	4.27628e-15
RGCC	3.11316e-19	0.430742	0.344	0.083	4.59347e-15
TRBJ2-2	3.88089e-19	0.25238	0.153	0.013	5.72626e-15
WDFY4	4.33825e-19	0.296852	0.244	0.04	6.40109e-15
COTL1	7.49093e-19	0.712947	0.382	0.109	1.10529e-14
RASSF2	8.62969e-19	0.334363	0.206	0.028	1.27331e-14
AIF1	1.22133e-18	0.292707	0.221	0.033	1.80208e-14
VIM	4.09906e-18	0.649752	0.985	0.71	6.04816e-14
TCF7	4.19898e-18	0.362599	0.237	0.041	6.1956e-14
ISG20	4.74254e-18	0.437329	0.389	0.111	6.99761e-14
CIITA	5.70104e-18	0.501049	0.382	0.11	8.41189e-14
ICAM1	7.91944e-18	0.429363	0.321	0.075	1.16851e-13
MYADM	1.5444e-17	0.415549	0.534	0.194	2.27876e-13
TSC22D3	1.5739e-17	0.743687	0.832	0.489	2.32229e-13
RUNX3	1.62192e-17	0.362284	0.313	0.073	2.39314e-13
GIMAP5	1.65384e-17	0.416514	0.29	0.065	2.44024e-13
SAMHD1	1.69209e-17	0.388742	0.344	0.09	2.49668e-13
KCNAB2	1.99237e-17	0.346816	0.267	0.054	2.93974e-13
HLA-A	2.74684e-17	0.611385	0.985	0.864	4.05297e-13
DSC2	3.06102e-17	-0.729603	0.84	0.977	4.51653e-13
APOBR	4.54742e-17	0.333743	0.29	0.065	6.70972e-13
PIK3CD	4.88203e-17	0.358969	0.298	0.069	7.20343e-13
RCSD1	6.17624e-17	0.289692	0.26	0.052	9.11305e-13
ARID5A	6.89706e-17	0.315759	0.305	0.072	1.01766e-12
HID1	7.34761e-17	0.275272	0.229	0.041	1.08414e-12
CTSS	8.72596e-17	0.368318	0.29	0.067	1.28752e-12
GLIPR2	1.07078e-16	0.289726	0.237	0.044	1.57994e-12
CSF2RB	1.42316e-16	0.390905	0.328	0.085	2.09988e-12
LPXN	1.49569e-16	0.28399	0.221	0.039	2.20688e-12
TBC1D4	2.20801e-16	0.466854	0.42	0.138	3.25791e-12
PLCG2	2.41537e-16	0.295217	0.282	0.064	3.56388e-12
STK10	4.18423e-16	0.388742	0.321	0.085	6.17384e-12
CD14	4.36254e-16	0.343997	0.282	0.065	6.43693e-12
ZFP36L2	5.53913e-16	0.61729	0.855	0.559	8.17299e-12
ORAI2	5.55923e-16	0.285422	0.244	0.049	8.20264e-12
GJA1	8.96087e-16	-0.7935	0.603	0.852	1.32218e-11
ALOX5	9.23161e-16	0.295349	0.252	0.053	1.36212e-11
DOCK11	9.3629e-16	0.289726	0.237	0.047	1.3815e-11
H1FX	9.97948e-16	0.628901	0.794	0.48	1.47247e-11
RAB30	1.08383e-15	0.300963	0.252	0.053	1.59919e-11
SOD2	1.464e-15	0.666927	0.649	0.324	2.16014e-11
RHOF	1.47506e-15	0.315447	0.221	0.042	2.17645e-11
C1QB	1.51733e-15	0.263358	0.191	0.03	2.23883e-11
SAMSN1	1.68672e-15	0.282542	0.214	0.039	2.48875e-11
FYN	4.24861e-15	0.276765	0.221	0.043	6.26883e-11
DOCK8	4.7092e-15	0.307539	0.29	0.073	6.94842e-11
FLI1	5.20269e-15	0.257837	0.221	0.043	7.67657e-11
HSPA1B	5.30896e-15	-0.634636	0.496	0.782	7.83337e-11
CCL22	5.67882e-15	0.370404	0.13	0.013	8.3791e-11
ST8SIA1	6.75637e-15	0.28399	0.214	0.041	9.96902e-11
DSC3	6.75961e-15	-0.786932	0.435	0.707	9.9738e-11
CCN2	7.69553e-15	0.430092	0.55	0.227	1.13548e-10
IFI30	7.79179e-15	0.430874	0.344	0.103	1.14968e-10
RNF213	8.73568e-15	0.539167	0.695	0.351	1.28895e-10
PDGFRB	1.00488e-14	0.471997	0.664	0.292	1.4827e-10
HSPB1	1.03673e-14	-0.544124	0.992	1	1.52969e-10
CD9	1.06855e-14	-0.594319	0.611	0.904	1.57664e-10
PECAM1	1.25741e-14	0.35456	0.412	0.137	1.85531e-10
NFATC2	1.78526e-14	0.250249	0.206	0.039	2.63415e-10
KRT5	1.801e-14	-0.715492	1	0.995	2.65738e-10
LBH	1.88825e-14	0.428025	0.435	0.15	2.78612e-10
SDF2L1	2.06533e-14	0.365549	0.336	0.101	3.04739e-10
PRKAR2B	2.15622e-14	0.253524	0.229	0.048	3.18151e-10
PREX1	2.58559e-14	0.338596	0.237	0.053	3.81504e-10
ARPC1B	3.23668e-14	0.493443	0.603	0.272	4.77572e-10
PBXIP1	3.34903e-14	0.465596	0.588	0.262	4.94149e-10
C3	3.77832e-14	0.457958	0.298	0.082	5.57491e-10
ITM2B	5.45279e-14	-0.423279	1	1	8.0456e-10
DSG1	5.51142e-14	-0.740454	0.878	0.97	8.1321e-10
CLU	5.88e-14	0.695887	0.649	0.311	8.67593e-10
EMB	6.39797e-14	0.28399	0.214	0.044	9.44021e-10
CRELD2	6.71319e-14	0.375732	0.481	0.188	9.90531e-10
CSF1	7.52006e-14	0.308629	0.366	0.115	1.10958e-09
SSR4	7.52091e-14	0.62057	0.718	0.434	1.10971e-09
TRAF5	7.62798e-14	0.286772	0.282	0.074	1.12551e-09
DSP	8.75269e-14	-0.614969	0.947	0.995	1.29146e-09
CHST11	1.27301e-13	0.303244	0.29	0.079	1.87833e-09
SFRP2	1.34094e-13	0.308512	0.298	0.083	1.97856e-09
ZNF101	1.35494e-13	0.265281	0.229	0.051	1.99922e-09
IFFO1	1.47826e-13	0.312318	0.313	0.091	2.18118e-09
RAB8B	1.63063e-13	0.259426	0.221	0.048	2.406e-09
SMAP2	1.65402e-13	0.344744	0.405	0.143	2.4405e-09
SPINT2	1.88092e-13	-0.620313	0.527	0.787	2.7753e-09
CTNNBIP1	1.9943e-13	-0.628323	0.679	0.873	2.94258e-09
PRDM1	2.11289e-13	0.264003	0.527	0.204	3.11758e-09
FMOD	2.22137e-13	0.468238	0.718	0.349	3.27763e-09
HLA-E	2.47414e-13	0.426221	0.985	0.963	3.65059e-09
RILPL2	2.74897e-13	0.394021	0.397	0.142	4.05611e-09
MMP19	2.82897e-13	0.342723	0.328	0.101	4.17415e-09
IRF1	3.07911e-13	0.413797	0.427	0.163	4.54323e-09
PKP1	3.18447e-13	-0.597418	0.908	0.976	4.69868e-09
PTPN6	3.28785e-13	0.335876	0.328	0.103	4.85122e-09
PPP1R16B	3.31753e-13	0.263608	0.198	0.04	4.89502e-09
ANP32E	3.98075e-13	0.450887	0.534	0.245	5.87359e-09
PALM2-AKAP2	3.99682e-13	0.297562	0.305	0.089	5.8973e-09
SH3KBP1	4.64269e-13	0.315398	0.282	0.078	6.85029e-09
SMCHD1	4.83375e-13	0.41888	0.588	0.283	7.1322e-09
C1S	5.45636e-13	0.506482	0.763	0.408	8.05085e-09
IGFLR1	5.77069e-13	0.254961	0.214	0.047	8.51465e-09
ACTA2	6.02027e-13	0.367948	0.443	0.167	8.8829e-09
KLF4	6.40187e-13	-0.550075	0.672	0.876	9.44596e-09
C1R	6.4082e-13	0.547024	0.885	0.531	9.45529e-09
ADAM19	7.13782e-13	0.256398	0.206	0.044	1.05319e-08
LIME1	7.54027e-13	0.342468	0.389	0.139	1.11257e-08
TMSB4X	8.20457e-13	0.756455	0.977	0.967	1.21058e-08
S100A4	8.39744e-13	0.495763	0.916	0.569	1.23904e-08
SEPTIN6	8.49341e-13	0.346785	0.26	0.07	1.2532e-08
RAB43	9.63797e-13	0.278504	0.305	0.091	1.42208e-08
GIMAP1	1.15159e-12	0.316594	0.282	0.08	1.69918e-08
B2M	1.26147e-12	0.552438	1	0.986	1.86129e-08
TMEM230	1.32017e-12	0.308736	0.435	0.166	1.94792e-08
DNAJB9	1.47629e-12	0.306626	0.336	0.11	2.17827e-08
STAB1	1.55986e-12	0.265392	0.229	0.055	2.30158e-08
KRT16	1.92137e-12	-0.611469	1	1	2.83499e-08
SFMBT2	1.93373e-12	0.250856	0.229	0.055	2.85322e-08
BCL2	2.07962e-12	0.274237	0.275	0.077	3.06849e-08
FGL2	2.24997e-12	0.412227	0.298	0.093	3.31983e-08
INPP4A	2.28775e-12	0.257363	0.275	0.077	3.37557e-08
BTG2	2.366e-12	0.509715	0.71	0.405	3.49104e-08
TNFRSF1B	2.50125e-12	0.28399	0.191	0.04	3.69059e-08
SLFN11	3.15506e-12	0.261135	0.229	0.056	4.6553e-08
SAP25	4.66769e-12	0.297639	0.298	0.093	6.88718e-08
IQSEC1	5.0424e-12	0.261921	0.298	0.091	7.44007e-08
TNS3	7.12623e-12	0.285356	0.29	0.089	1.05148e-07
PGGHG	7.89599e-12	0.390905	0.427	0.175	1.16505e-07
GBP6	8.22337e-12	-0.636779	0.397	0.682	1.21336e-07
CCM2	1.10422e-11	0.327672	0.366	0.135	1.62927e-07
CTSH	1.2665e-11	0.279874	0.282	0.086	1.86873e-07
GMIP	1.32453e-11	0.281228	0.275	0.083	1.95434e-07
ACKR1	1.3748e-11	0.277363	0.305	0.096	2.02851e-07
STAT5A	1.67878e-11	0.263526	0.305	0.097	2.47705e-07
SOD3	1.68869e-11	0.499114	0.656	0.339	2.49166e-07
CRIP1	1.71005e-11	0.652811	0.763	0.475	2.52319e-07
CDC42SE2	1.80137e-11	0.371684	0.359	0.137	2.65792e-07
FNBP1	1.88354e-11	0.352249	0.519	0.232	2.77916e-07
COL4A2	2.16397e-11	0.290137	0.427	0.169	3.19294e-07
CASP8	2.32493e-11	0.371766	0.336	0.123	3.43043e-07
CD4	2.5232e-11	0.272378	0.183	0.04	3.72298e-07
RARRES2	2.64046e-11	0.306016	0.519	0.224	3.896e-07
FSTL1	2.89036e-11	0.401735	0.763	0.401	4.26472e-07
HLA-F	2.93203e-11	0.464094	0.511	0.24	4.32621e-07
CLSTN3	2.95066e-11	0.268136	0.344	0.12	4.3537e-07
LGALS1	3.02038e-11	0.416947	0.702	0.368	4.45657e-07
ARHGEF2	4.39942e-11	0.337571	0.351	0.13	6.49134e-07
CTHRC1	4.56113e-11	0.35505	0.45	0.187	6.72995e-07
PSMB10	5.25784e-11	0.393767	0.397	0.165	7.75794e-07
TMPRSS11D	6.02269e-11	-0.735639	0.641	0.825	8.88648e-07
NIBAN1	6.06878e-11	0.319488	0.382	0.15	8.95448e-07
LYPD3	6.71906e-11	-0.673329	0.878	0.963	9.91398e-07
PDIA4	7.14999e-11	0.401084	0.603	0.304	1.05498e-06
FBLN2	7.53531e-11	0.360671	0.695	0.354	1.11183e-06
DSG3	8.91671e-11	-0.657561	0.74	0.903	1.31566e-06
FNDC3B	9.72944e-11	0.379147	0.542	0.263	1.43558e-06
IGFBP7	9.82438e-11	0.393917	0.855	0.455	1.44959e-06
DUSP2	1.00766e-10	0.259043	0.267	0.083	1.4868e-06
EPPK1	1.43965e-10	-0.707338	0.588	0.797	2.12421e-06
CCDC71L	1.49992e-10	0.263171	0.267	0.084	2.21313e-06
FBN1	1.5507e-10	0.411149	0.809	0.456	2.28807e-06
UBE2J1	1.63873e-10	0.305898	0.359	0.138	2.41795e-06
SLC7A6	1.66989e-10	0.251248	0.229	0.065	2.46393e-06
CPA3	2.17377e-10	0.286483	0.374	0.145	3.2074e-06
HLA-DMB	2.25206e-10	0.276808	0.198	0.051	3.32291e-06
MICAL1	2.28031e-10	0.335453	0.374	0.149	3.3646e-06
FLT3LG	2.30065e-10	0.275816	0.282	0.094	3.39461e-06
RAPGEF1	2.30618e-10	0.393614	0.389	0.169	3.40277e-06
SIPA1	2.45925e-10	0.301759	0.26	0.083	3.62862e-06
IFNAR2	2.51537e-10	0.261403	0.237	0.07	3.71143e-06
COL6A3	2.67594e-10	0.398868	0.802	0.437	3.94834e-06
PLEKHO1	2.97932e-10	0.264661	0.26	0.082	4.39599e-06
CLEC3B	3.65464e-10	0.267661	0.443	0.183	5.39242e-06
ATM	3.83027e-10	0.307197	0.344	0.132	5.65156e-06
MOB3A	4.51431e-10	0.276041	0.328	0.122	6.66086e-06
NAMPT	4.9664e-10	0.366055	0.45	0.209	7.32792e-06
TCIRG1	5.06979e-10	0.347218	0.427	0.187	7.48047e-06
CTSZ	5.25711e-10	0.424038	0.45	0.213	7.75686e-06
TXN	5.30341e-10	-0.574402	0.87	0.935	7.82518e-06
IGFBP4	5.49965e-10	0.308541	0.947	0.587	8.11473e-06
GRK6	5.684e-10	0.282669	0.328	0.123	8.38675e-06
HSPA5	5.6999e-10	0.484025	0.878	0.762	8.4102e-06
CTSG	5.9811e-10	0.289142	0.321	0.118	8.82511e-06
CDK6	6.00526e-10	0.2769	0.481	0.218	8.86075e-06
PSD4	6.42615e-10	0.285297	0.351	0.139	9.48178e-06
SLC38A10	7.69008e-10	0.332461	0.55	0.28	1.13467e-05
NFATC1	7.78373e-10	0.296553	0.229	0.069	1.14849e-05
LAD1	7.89592e-10	-0.552895	0.527	0.744	1.16504e-05
SERPINF1	8.06078e-10	0.358757	0.603	0.309	1.18937e-05
FXYD5	8.54957e-10	0.318026	0.359	0.146	1.26149e-05
GBP2	9.21083e-10	0.275428	0.435	0.19	1.35906e-05
GJB2	9.80106e-10	-0.70069	0.748	0.898	1.44615e-05
TRIM52	9.93825e-10	0.282669	0.321	0.121	1.46639e-05
CCDC91	1.00549e-09	0.26409	0.42	0.182	1.4836e-05
PPP2CB	1.17086e-09	-0.460969	0.557	0.78	1.72761e-05
KDM2B	1.26658e-09	0.37626	0.29	0.106	1.86884e-05
MYC	1.3127e-09	-0.686733	0.748	0.842	1.93689e-05
PCOLCE	1.31848e-09	0.331181	0.901	0.519	1.94542e-05
SYNE3	1.35684e-09	0.253078	0.298	0.107	2.00201e-05
EIF2AK3	1.35789e-09	0.305326	0.382	0.163	2.00357e-05
BTN3A1	1.39887e-09	0.286634	0.321	0.123	2.06404e-05
CLPTM1L	1.51157e-09	0.355156	0.55	0.294	2.23033e-05
CCDC69	1.58632e-09	0.268048	0.305	0.112	2.34061e-05
SYVN1	1.70883e-09	0.396572	0.55	0.301	2.52139e-05
CXCL12	1.9429e-09	0.347911	0.855	0.496	2.86674e-05
CARD8	2.51311e-09	0.335074	0.42	0.193	3.70809e-05
RASA2	2.78071e-09	0.356202	0.351	0.148	4.10294e-05
ARSA	3.17507e-09	0.290137	0.42	0.191	4.68481e-05
RASSF1	3.40105e-09	0.294258	0.344	0.141	5.01825e-05
EHF	3.69632e-09	-0.482188	0.435	0.667	5.45392e-05
S100A14	3.74599e-09	-0.62762	0.908	0.974	5.52721e-05
TNKS1BP1	3.88436e-09	-0.428631	0.504	0.754	5.73137e-05
DCN	4.01548e-09	0.374082	1	0.727	5.92484e-05
FTL	4.32607e-09	0.378292	0.947	0.749	6.38311e-05
MAF	5.15962e-09	-0.449436	0.832	0.91	7.61302e-05
MGAT1	5.24115e-09	0.317104	0.473	0.235	7.73332e-05
LUM	5.49453e-09	0.450997	0.802	0.482	8.10718e-05
EHD1	5.61045e-09	0.260531	0.351	0.146	8.27823e-05
KRT4	5.7119e-09	-0.376955	0.939	0.723	8.4279e-05
ATP13A1	6.1681e-09	0.28642	0.427	0.197	9.10103e-05
IFITM2	6.30687e-09	0.382409	0.794	0.497	9.30578e-05
PKP3	6.9504e-09	-0.498064	0.557	0.738	0.000102553
LSP1	7.59773e-09	0.399187	0.817	0.533	0.000112105
ZFYVE28	8.13661e-09	0.295864	0.305	0.122	0.000120056
TAPBP	9.72009e-09	0.422045	0.672	0.434	0.00014342
EMP2	9.79636e-09	-0.421465	0.176	0.436	0.000144545
UNC93B1	1.03989e-08	0.255523	0.359	0.153	0.000153435
CYBC1	1.09285e-08	0.367682	0.389	0.185	0.000161251
PPP1R18	1.09653e-08	0.276084	0.305	0.119	0.000161793
GRK2	1.2501e-08	0.361219	0.649	0.382	0.000184452
NFKBID	1.26162e-08	0.279826	0.237	0.08	0.000186152
LRCH4	1.262e-08	0.313091	0.504	0.269	0.000186209
RHOG	1.32297e-08	0.263453	0.359	0.156	0.000195204
TXNDC11	1.34736e-08	0.27195	0.305	0.122	0.000198802
SUN2	1.35547e-08	0.351894	0.534	0.29	0.0002
HNRNPLL	1.47888e-08	0.357874	0.443	0.214	0.000218209
TIMP1	1.52054e-08	0.343335	0.542	0.292	0.000224356
TXNDC15	1.66556e-08	0.259104	0.313	0.124	0.000245753
CFD	1.70782e-08	0.283149	0.649	0.341	0.000251989
NNMT	1.78409e-08	0.278772	0.313	0.127	0.000263243
SLC2A3	1.90962e-08	0.266916	0.191	0.056	0.000281765
TRADD	1.94274e-08	0.369678	0.534	0.3	0.000286651
APOL6	2.04415e-08	0.256358	0.336	0.141	0.000301614
TYK2	2.14765e-08	0.265796	0.427	0.204	0.000316885
EDEM1	2.17033e-08	0.252364	0.382	0.171	0.000320233
TMC6	2.17544e-08	0.26398	0.298	0.119	0.000320986
CDH1	2.2068e-08	-0.475843	0.244	0.471	0.000325614
COL4A1	2.45364e-08	0.287479	0.405	0.182	0.000362035
CDKN1B	2.60256e-08	0.278165	0.473	0.236	0.000384008
GIMAP4	2.89015e-08	0.279728	0.183	0.054	0.000426442
CBR1	3.20363e-08	-0.567912	0.519	0.684	0.000472695
FABP5	3.47613e-08	-0.474576	0.985	0.995	0.000512902
PITX1	3.53067e-08	-0.495311	0.626	0.771	0.00052095
ACADVL	3.78332e-08	-0.426605	0.618	0.777	0.000558229
TEDC1	4.35463e-08	0.332407	0.389	0.186	0.000642526
CRLF3	4.59111e-08	0.26856	0.336	0.146	0.000677419
C11orf96	4.6722e-08	0.253616	0.321	0.132	0.000689384
GIPC1	5.35583e-08	-0.433951	0.55	0.692	0.000790253
BICD2	5.62867e-08	-0.387506	0.595	0.801	0.00083051
TRIB2	5.66617e-08	0.266652	0.374	0.168	0.000836043
GOLPH3	5.88468e-08	0.348358	0.664	0.425	0.000868285
CDC25B	6.13793e-08	0.290503	0.504	0.261	0.000905652
ATP5MG	6.29294e-08	0.301341	0.595	0.353	0.000928524
SPCS3	6.68312e-08	0.402753	0.481	0.271	0.000986094
IDS	8.96016e-08	0.309041	0.458	0.246	0.00132207
BNIPL	9.15588e-08	-0.465165	0.237	0.448	0.00135095
MRFAP1L1	9.2132e-08	0.336966	0.58	0.34	0.00135941
CTSC	9.27279e-08	0.362116	0.412	0.211	0.0013682
TGOLN2	9.79699e-08	0.321159	0.603	0.366	0.00144555
SOCS3	1.14667e-07	0.307073	0.58	0.318	0.00169191
SERPINB13	1.18534e-07	-0.716503	0.496	0.676	0.00174897
BET1L	1.22564e-07	0.291913	0.473	0.245	0.00180844
KLF6	1.27669e-07	0.345028	0.802	0.611	0.00188376
TNFAIP8	1.32774e-07	0.262172	0.252	0.097	0.00195908
MPZL2	1.3857e-07	-0.497009	0.473	0.689	0.00204461
RAMP3	1.43474e-07	0.257207	0.206	0.07	0.00211696
IFITM1	2.04633e-07	0.319534	0.481	0.265	0.00301936
SQSTM1	2.52292e-07	0.327667	0.878	0.823	0.00372257
TGFB1	2.61574e-07	0.282823	0.435	0.228	0.00385952
COL3A1	2.93246e-07	0.264123	1	0.918	0.00432685
NFKB2	3.03153e-07	0.314363	0.374	0.186	0.00447302
MIF	3.10486e-07	-0.389156	0.649	0.78	0.00458121
AHNAK2	3.50619e-07	-0.429736	0.328	0.542	0.00517339
ERN1	4.28965e-07	0.280257	0.359	0.172	0.00632938
S100A16	4.60843e-07	-0.491057	0.733	0.912	0.00679973
GSTP1	4.8241e-07	-0.35497	0.962	0.98	0.00711796
PIK3IP1	5.06355e-07	0.251684	0.321	0.147	0.00747127
EIF4G1	5.11246e-07	-0.332873	0.779	0.883	0.00754344
PRDX4	6.1331e-07	0.254395	0.374	0.185	0.00904939
FN1	6.62097e-07	0.306936	0.74	0.433	0.00976925
SLFN5	7.05844e-07	0.292559	0.366	0.182	0.0104147
TP53INP1	7.26177e-07	0.255213	0.305	0.14	0.0107147
LAT	7.34143e-07	0.251441	0.198	0.072	0.0108323
ALDH3A1	7.52295e-07	-0.495258	0.45	0.624	0.0111001
PPP1R9B	8.15077e-07	0.292414	0.527	0.31	0.0120265
SIGIRR	8.35954e-07	0.321165	0.298	0.141	0.0123345
COX8A	9.13386e-07	0.337847	0.664	0.448	0.013477
PTPRF	9.59019e-07	-0.503107	0.313	0.485	0.0141503
SERPINB5	9.61241e-07	-0.459713	0.489	0.648	0.0141831
MARCKSL1	1.20986e-06	0.360918	0.305	0.148	0.0178516
S100A10	1.22351e-06	-0.398428	0.885	0.887	0.0180528
CCNL1	1.25618e-06	0.286844	0.641	0.405	0.0185349
PLXND1	1.34373e-06	0.250349	0.458	0.247	0.0198268
LTB4R	1.37521e-06	-0.468651	0.542	0.665	0.0202912
DENND2D	1.41107e-06	0.326845	0.389	0.211	0.0208204
TUBB2A	1.45769e-06	-0.541634	0.435	0.585	0.0215082
ALDH3A2	1.49402e-06	-0.397123	0.519	0.691	0.0220443
ACTB	1.63268e-06	0.422291	1	0.997	0.0240902
PGD	1.71494e-06	-0.38623	0.603	0.72	0.0253039
CBX6	1.961e-06	0.295165	0.443	0.252	0.0289346
CD63	2.034e-06	0.349943	0.786	0.633	0.0300117
MYH14	2.31067e-06	-0.546862	0.527	0.646	0.034094
CRABP2	2.51134e-06	-0.450884	0.618	0.75	0.0370548
GADD45A	2.7856e-06	0.308834	0.397	0.218	0.0411015
ANXA5	2.94095e-06	0.288675	0.595	0.356	0.0433937
MAPK13	3.24498e-06	-0.410307	0.267	0.458	0.0478797
EIF4G2	3.45211e-06	-0.297877	0.725	0.857	0.0509359
ABLIM1	3.47414e-06	-0.422876	0.504	0.674	0.0512609
CA12	3.74683e-06	-0.454662	0.252	0.429	0.0552845
PPP2R5C	3.97793e-06	0.309949	0.565	0.372	0.0586943
COPZ1	4.23081e-06	0.278608	0.511	0.307	0.0624256
LASP1	5.05602e-06	0.273482	0.519	0.31	0.0746016
TRIM29	5.06106e-06	-0.314889	0.977	0.998	0.0746759
TMBIM6	5.27298e-06	-0.303269	0.687	0.827	0.0778028
PITX2	5.33043e-06	-0.432217	0.305	0.484	0.0786505
ARHGEF1	5.61404e-06	0.330828	0.511	0.318	0.0828351
TRPS1	5.64936e-06	-0.353687	0.374	0.572	0.0833563
FAM83G	5.80227e-06	-0.490487	0.397	0.545	0.0856125
CFLAR	6.25792e-06	0.29364	0.496	0.303	0.0923356
TMEM165	6.28224e-06	-0.387196	0.275	0.457	0.0926944
KRT14	6.50439e-06	-0.303268	1	1	0.0959722
PPIB	6.7741e-06	0.304748	0.794	0.611	0.0999519
EVPL	6.81247e-06	-0.338029	0.756	0.86	0.100518
VAV3	7.51769e-06	-0.37943	0.214	0.4	0.110923
CTNND1	7.94297e-06	-0.337461	0.725	0.841	0.117199
RNH1	8.47715e-06	-0.346426	0.595	0.702	0.12508
DDR1	9.79254e-06	-0.408001	0.412	0.546	0.144489
GABARAP	1.03224e-05	0.291144	0.916	0.858	0.152308
ITPKB	1.0326e-05	0.259372	0.282	0.138	0.152359
YWHAQ	1.09844e-05	-0.287449	0.626	0.751	0.162075
OGT	1.131e-05	0.256132	0.656	0.423	0.16688
TP63	1.17557e-05	-0.417318	0.382	0.548	0.173455
ID1	1.21744e-05	-0.402588	0.649	0.792	0.179633
NSG1	1.39405e-05	-0.428314	0.275	0.442	0.205692
KRT13	1.40618e-05	0.276729	1	0.972	0.207482
GTF2IRD1	1.43335e-05	-0.281059	0.137	0.326	0.211491
FAM83B	1.48741e-05	-0.388725	0.221	0.389	0.219467
EZR	1.60536e-05	-0.409776	0.435	0.551	0.236871
COL17A1	1.62953e-05	-0.777197	0.733	0.773	0.240438
SEL1L	1.95989e-05	0.290976	0.397	0.232	0.289182
SLPI	2.00337e-05	-0.654827	0.603	0.724	0.295598
HEBP2	2.06468e-05	-0.367358	0.405	0.572	0.304644
DUOX1	2.0943e-05	-0.37859	0.351	0.515	0.309014
NECTIN1	2.32506e-05	-0.369256	0.557	0.662	0.343063
STK4	2.78419e-05	0.28399	0.305	0.162	0.410807
LMNA	3.14745e-05	-0.283626	0.901	0.932	0.464406
HDGF	3.23741e-05	-0.331431	0.656	0.745	0.47768
FAM50A	3.36026e-05	0.254631	0.527	0.341	0.495806
TNIK	3.40335e-05	0.255523	0.29	0.148	0.502164
EFNA3	3.46018e-05	-0.335587	0.153	0.315	0.51055
RHOV	3.52781e-05	-0.375277	0.298	0.463	0.520529
CLCA2	3.70109e-05	-0.335293	0.252	0.432	0.546096
LGR4	3.78169e-05	-0.391347	0.229	0.382	0.557988
EIF6	3.90712e-05	-0.35106	0.359	0.513	0.576495
TSPO	4.05979e-05	-0.301524	0.649	0.777	0.599022
IVL	4.40856e-05	-0.636554	0.771	0.85	0.650483
SPRR2G	5.24625e-05	-0.257296	0.931	0.817	0.774084
DIDO1	5.65047e-05	0.270849	0.595	0.411	0.833727
PALLD	6.39342e-05	-0.319264	0.382	0.542	0.94335
SLK	6.50942e-05	-0.347949	0.366	0.504	0.960465
SEPTIN9	6.542e-05	0.252867	0.45	0.278	0.965272
IGFBP2	6.62698e-05	-0.388472	0.611	0.711	0.977811
KLF5	6.96641e-05	-0.328085	0.634	0.76	1
RAB25	7.0024e-05	-0.375277	0.298	0.452	1
SDC4	7.41913e-05	-0.305822	0.221	0.382	1
ZNF750	7.42898e-05	-0.40676	0.359	0.505	1
ARF1	7.9135e-05	0.286598	0.809	0.717	1
ATP13A4	8.17917e-05	-0.335494	0.16	0.32	1
JUP	9.19422e-05	-0.291341	0.939	0.985	1
FOSB	9.26734e-05	0.267545	0.977	0.795	1
CD24	9.29327e-05	-0.483951	0.458	0.586	1
PITPNM3	0.000101618	-0.262292	0.115	0.266	1
PROM2	0.00011148	-0.321437	0.412	0.548	1
CEP170B	0.000113817	-0.285053	0.221	0.375	1
ADAM15	0.000114797	-0.271055	0.176	0.336	1
CXCL14	0.000122283	-0.606539	0.947	0.864	1
F11R	0.00012941	-0.272822	0.198	0.357	1
PABPC1	0.00013135	-0.278572	0.977	0.984	1
RTN4	0.000134269	-0.287723	0.74	0.825	1
ARHGEF4	0.0001343	-0.372514	0.45	0.56	1
TUFT1	0.000135162	-0.283051	0.153	0.306	1
METRNL	0.000141149	-0.428817	0.611	0.725	1
FXYD3	0.000145718	-0.384029	0.435	0.542	1
ALS2CL	0.000168531	-0.286242	0.267	0.428	1
KLK11	0.000175758	-0.427478	0.565	0.694	1
ATP5F1B	0.000177117	-0.272746	0.595	0.754	1
IFFO2	0.000188773	-0.547451	0.374	0.488	1
SREBF2	0.0001904	-0.263979	0.183	0.339	1
GTF2I	0.000205351	-0.320455	0.519	0.63	1
S100A2	0.000206882	-0.564606	0.878	0.873	1
PTMS	0.000211817	-0.35836	0.885	0.863	1
ZBTB7A	0.000211823	-0.261428	0.611	0.757	1
GPC1	0.000217267	-0.366789	0.45	0.552	1
HSPA8	0.000218504	-0.291742	0.771	0.836	1
ARRDC3	0.000241413	-0.375808	0.374	0.485	1
PLEKHA1	0.000256595	-0.282166	0.214	0.363	1
TACC2	0.000259264	-0.320469	0.374	0.503	1
RAB10	0.000276452	-0.331696	0.382	0.499	1
KTN1	0.000303904	-0.359457	0.359	0.472	1
MXI1	0.000305281	-0.312161	0.198	0.334	1
ALDH2	0.000309962	-0.330774	0.282	0.425	1
SPRR2D	0.000314287	-0.434829	0.939	0.807	1
CAPNS2	0.000316451	-0.338941	0.29	0.416	1
NFIX	0.00032524	-0.340501	0.275	0.401	1
CUX1	0.000343268	-0.25443	0.267	0.418	1
EIF4H	0.000363626	-0.254595	0.702	0.818	1
CHP1	0.000381041	-0.250787	0.168	0.312	1
IVNS1ABP	0.000382817	-0.361079	0.496	0.566	1
MAPT	0.000399401	-0.27191	0.153	0.294	1
ST14	0.000427933	-0.258581	0.221	0.367	1
DUOXA1	0.000428825	-0.311986	0.382	0.508	1
CRYAB	0.000446868	-0.46794	0.427	0.519	1
ZBTB7C	0.000450507	-0.280322	0.267	0.405	1
TACSTD2	0.000467287	-0.468288	0.786	0.893	1
NUPR1	0.000469069	-0.342552	0.45	0.548	1
SPINK7	0.000485745	-0.52852	0.817	0.62	1
OS9	0.000511951	0.302137	0.588	0.466	1
IMPA2	0.000558587	-0.347412	0.374	0.476	1
LAMA3	0.000576729	-0.334164	0.13	0.257	1
PITPNA	0.000594944	-0.301569	0.588	0.693	1
LRATD1	0.000597949	-0.278691	0.244	0.388	1
NFE2L2	0.000616512	-0.367841	0.58	0.673	1
THBD	0.000623635	-0.377047	0.382	0.481	1
FOXE1	0.000631048	-0.299171	0.321	0.44	1
ANKRD35	0.000675186	-0.346914	0.29	0.416	1
CITED4	0.000682112	-0.411156	0.321	0.435	1
GJB6	0.000753096	-0.491724	0.275	0.389	1
JAG1	0.00075652	-0.352435	0.405	0.506	1
FGFR3	0.000781088	-0.346777	0.328	0.439	1
CD55	0.000815097	-0.466617	0.389	0.486	1
SEMA4B	0.000920969	-0.384228	0.435	0.499	1
MAT2A	0.000925481	-0.307612	0.573	0.687	1
MAP7	0.000941297	-0.267387	0.26	0.386	1
KRTDAP	0.00097835	-0.835779	0.763	0.852	1
PPP1CB	0.000995685	-0.295158	0.443	0.567	1
SDR16C5	0.00100106	-0.311685	0.206	0.332	1
SH3PXD2A	0.00107177	-0.25119	0.321	0.454	1
ERBB3	0.00119228	-0.254286	0.229	0.356	1
SLC16A9	0.00126799	-0.291984	0.221	0.336	1
DAAM1	0.0012874	-0.259563	0.214	0.338	1
S100A7	0.00135106	-0.53596	0.71	0.518	1
FAM110C	0.00138076	-0.251561	0.191	0.321	1
KANK1	0.00141666	-0.257157	0.168	0.29	1
KRT1	0.0014338	-0.863055	0.939	0.869	1
PRDX6	0.00143585	-0.27245	0.427	0.541	1
TUBA4A	0.00145938	-0.250623	0.679	0.767	1
LMO4	0.00146194	-0.390269	0.481	0.538	1
IRF6	0.00166564	-0.258971	0.298	0.42	1
CERS3	0.00168912	-0.294318	0.237	0.356	1
TRAK1	0.00184323	-0.272404	0.267	0.381	1
ABCC5	0.00189892	-0.330389	0.305	0.403	1
KRT80	0.00191397	-0.429533	0.679	0.462	1
ARRDC4	0.00192703	-0.256579	0.168	0.284	1
ERBB2	0.00203318	-0.288395	0.359	0.464	1
IGSF3	0.00208657	-0.251561	0.214	0.333	1
SPINT1	0.00215953	-0.283142	0.359	0.481	1
TFAP2A	0.00235168	-0.260794	0.282	0.399	1
LOR	0.00240771	-0.719786	0.87	0.742	1
EIF4B	0.00244671	-0.280948	0.626	0.679	1
CNFN	0.00262759	-0.487692	0.954	0.822	1
IP6K2	0.00278375	-0.295848	0.359	0.451	1
GLTP	0.00280356	-0.542434	0.618	0.678	1
FAM83H	0.00283833	-0.259153	0.389	0.506	1
GRHL2	0.00284962	-0.269351	0.244	0.348	1
LGALSL	0.00289419	-0.374461	0.42	0.51	1
PDZK1IP1	0.0029469	-0.360597	0.198	0.3	1
HMGCR	0.00301104	-0.280003	0.153	0.262	1
CLSTN1	0.00310009	-0.30855	0.443	0.514	1
HNRNPA3	0.00310628	-0.266596	0.687	0.765	1
CEBPA	0.00318198	-0.301916	0.26	0.358	1
CDHR1	0.00318614	-0.293898	0.176	0.285	1
MAST4	0.00325636	-0.286326	0.397	0.482	1
GRHL3	0.0035246	-0.391195	0.374	0.452	1
DAPL1	0.00355868	-0.263498	0.176	0.283	1
RAB11A	0.00374468	-0.289984	0.397	0.488	1
DEGS1	0.00403431	-0.300097	0.305	0.405	1
PTGR1	0.00410678	-0.250787	0.26	0.367	1
DNAJB1	0.00411773	-0.26084	0.557	0.627	1
ACAP3	0.00436017	-0.259062	0.573	0.636	1
GRHL1	0.00464766	-0.414546	0.275	0.362	1
OGN	0.00510268	-0.252294	0.092	0.184	1
SLC47A2	0.00513738	-0.289875	0.275	0.373	1
C10orf99	0.00556822	-0.291984	0.214	0.307	1
SEMA3F	0.0058709	-0.255606	0.412	0.492	1
DSC1	0.00588684	-0.451994	0.115	0.208	1
LCE3D	0.00686833	-0.914867	0.679	0.481	1
CLIP1	0.00708391	-0.300167	0.435	0.489	1
ITPRID2	0.00783408	-0.25687	0.176	0.27	1
EBPL	0.00812458	-0.279725	0.374	0.438	1
MAL2	0.00814934	-0.290874	0.435	0.52	1
MAP1LC3A	0.00819931	-0.352812	0.206	0.298	1
S100A9	0.00971559	-0.373136	1	1	1
PLA2G4F	0.00978281	-0.259563	0.206	0.297	1
YOD1	0.0107861	-0.36053	0.107	0.191	1
VAT1	0.0114692	-0.26172	0.305	0.387	1
DHCR24	0.0115964	-0.283957	0.412	0.47	1
GSN	0.0116701	-0.327956	0.786	0.859	1
SLURP1	0.0120247	-0.292786	0.466	0.301	1
RHOD	0.0126198	-0.252244	0.305	0.398	1
KIAA1522	0.0128369	-0.264813	0.397	0.466	1
PRSS27	0.0130546	-0.25816	0.427	0.273	1
ABCA12	0.0176573	-0.327125	0.206	0.286	1
CYP4F22	0.0189577	-0.3446	0.137	0.214	1
CPEB2	0.0192477	-0.313066	0.45	0.474	1
PGLYRP3	0.0234833	-0.278175	0.221	0.292	1
DLX3	0.0271494	-0.261857	0.214	0.288	1
KRT15	0.0276432	-0.54212	0.947	0.882	1
CLDN1	0.0283896	-0.370788	0.344	0.383	1
GSDMA	0.0301078	-0.350898	0.076	0.141	1
HOPX	0.0304203	-0.687316	0.786	0.841	1
LCE3E	0.0355919	-0.521021	0.313	0.202	1
ATP1B1	0.0377956	-0.409122	0.237	0.302	1
MPZ	0.0391266	-0.274006	0.053	0.11	1
TNFSF10	0.0417134	-0.250914	0.389	0.463	1
SERPINB11	0.0420277	-0.383488	0.221	0.282	1
LCN2	0.0421183	-0.320158	0.229	0.144	1
AKR1B10	0.0453912	-0.302559	0.397	0.434	1
KRT6B	0.047697	-0.496287	1	0.992	1
EPS8L1	0.0478903	-0.443698	0.16	0.22	1
COL7A1	0.0528774	-0.265172	0.344	0.412	1
S100A8	0.0555748	-0.326627	1	1	1
IL36RN	0.0564506	-0.300101	0.344	0.227	1
POF1B	0.0613127	-0.497953	0.298	0.347	1
SPINK5	0.0656635	-0.6565	0.779	0.805	1
RHOB	0.0659098	-0.277552	0.649	0.629	1
PLBD1	0.0674301	-0.252598	0.168	0.225	1
CRNN	0.0688809	-0.863755	0.916	0.787	1
ERO1A	0.0783539	-0.434644	0.405	0.286	1
NAB1	0.0784851	-0.250463	0.405	0.425	1
DST	0.0863634	-0.324788	0.534	0.526	1
FBLN1	0.0880357	-0.402771	0.58	0.539	1
MMP13	0.0902138	-0.60588	0.099	0.148	1
KRT78	0.0920698	-0.85644	0.649	0.471	1
ASPRV1	0.0946108	-0.646976	0.282	0.2	1
OCLN	0.105547	-0.289325	0.16	0.206	1
CDSN	0.118033	-0.965203	0.504	0.385	1
DUSP14	0.12772	-0.256579	0.237	0.282	1
HEPHL1	0.133173	-0.353112	0.183	0.222	1
NCCRP1	0.135902	-0.666446	0.351	0.355	1
KRT3	0.136905	-0.345017	0.695	0.569	1
BOC	0.137606	-0.262084	0.359	0.376	1
CCER2	0.143545	-0.662223	0.26	0.199	1
KLK8	0.151038	-0.250707	0.214	0.248	1
KRT23	0.165335	-0.326007	0.092	0.13	1
A2ML1	0.170717	-0.370286	0.626	0.635	1
H1F0	0.1748	-0.284853	0.298	0.326	1
ATP6V1C2	0.175416	-0.323096	0.137	0.173	1
KRT76	0.185444	-1.03614	1	1	1
PPIF	0.188303	-0.298055	0.466	0.345	1
CSTB	0.212266	-0.440353	1	1	1
IL36G	0.216557	-0.355892	0.344	0.26	1
FDCSP	0.21981	-1.1812	0.29	0.31	1
RHCG	0.241133	-0.518737	0.817	0.743	1
KRT10	0.248809	-0.604794	0.954	0.905	1
TGM1	0.264715	-0.501451	0.374	0.371	1
GLUL	0.266972	-0.325394	0.786	0.75	1
GPX3	0.28009	-0.42383	0.389	0.385	1
LCE2C	0.280725	-0.32197	0.099	0.127	1
EMP1	0.29254	-0.37123	0.855	0.86	1
TPPP3	0.304871	-0.29853	0.397	0.379	1
WFDC12	0.305203	-0.415725	0.153	0.177	1
KLK12	0.306667	-0.354891	0.427	0.322	1
TP53INP2	0.310195	-0.295466	0.267	0.287	1
SPARC	0.327978	-0.364187	1	0.725	1
ALOX12B	0.341521	-0.401577	0.321	0.25	1
RPTN	0.360407	-0.850577	0.489	0.387	1
SBSN	0.360651	-0.393031	0.939	0.929	1
C15orf48	0.372515	-0.485607	0.16	0.179	1
KLK13	0.376459	-0.609891	0.679	0.615	1
TTC9	0.376704	-0.298993	0.229	0.236	1
TMPRSS11E	0.420518	-0.518253	0.282	0.222	1
FAM43A	0.429266	-0.309633	0.42	0.397	1
F3	0.452064	-0.281705	0.389	0.385	1
PI3	0.458542	-0.63179	0.252	0.25	1
MXD1	0.477941	-0.274718	0.374	0.297	1
PPL	0.486895	-0.4148	0.855	0.884	1
CLDN7	0.550421	-0.263425	0.252	0.254	1
IGFBP5	0.551602	-0.373286	0.947	0.75	1
KLK14	0.573391	-0.293853	0.198	0.165	1
C1orf116	0.575249	-0.264799	0.313	0.3	1
KLK7	0.578382	-0.64459	0.481	0.436	1
ELF3	0.58043	-0.272022	0.145	0.154	1
PIM1	0.628503	-0.322598	0.42	0.381	1
CALML5	0.637186	-0.892135	0.458	0.406	1
SPRR2F	0.657999	-0.254587	0.137	0.116	1
TMPRSS11B	0.658107	-0.679055	0.412	0.326	1
CLIC3	0.724092	-0.422838	0.412	0.364	1
TGM3	0.73992	-0.559952	0.954	0.869	1
RNF225	0.764895	-0.322625	0.244	0.213	1
GM2A	0.821486	-0.273886	0.542	0.482	1
IL36A	0.825066	-0.401188	0.221	0.215	1
APOD	0.851985	-0.341387	0.305	0.278	1
KLK10	0.859539	-0.580526	0.687	0.676	1
KRT2	0.887238	-0.751361	0.412	0.362	1
TGM6	0.8998	-0.367584	0.26	0.238	1
SPNS2	0.908555	-0.343219	0.275	0.245	1
FLG	0.944913	-0.333829	0.237	0.217	1
PLA2G4D	0.981059	-0.471222	0.221	0.204	1

## Sheet: A1 - region3
	p_val	avg_log2FC	pct.1	pct.2	p_val_adj
COL17A1	5.21896e-66	2.00791	1	0.738	7.70058e-62
CXCL14	2.94061e-62	1.68106	1	0.858	4.33887e-58
KRT15	3.44393e-59	1.90422	1	0.875	5.08152e-55
GOLGA7B	2.37326e-53	0.907435	0.738	0.159	3.50175e-49
DST	6.33896e-53	1.41815	0.968	0.469	9.35314e-49
PCDH7	2.37751e-52	0.936401	0.722	0.155	3.50801e-48
BOC	1.01395e-50	1.17581	0.889	0.307	1.49609e-46
TP73	1.77345e-49	0.806849	0.69	0.143	2.61672e-45
LAMB4	2.40844e-48	0.690969	0.492	0.06	3.55366e-44
TP53AIP1	2.42638e-48	1.11512	0.841	0.278	3.58012e-44
TNS4	3.95066e-48	1.14303	0.952	0.386	5.82921e-44
EPCAM	2.16851e-47	0.501666	0.421	0.041	3.19964e-43
COL7A1	2.6636e-47	1.3098	0.889	0.34	3.93013e-43
S100A9	3.34326e-47	-1.81103	1	1	4.93298e-43
NCKAP5	4.72282e-47	0.860822	0.794	0.214	6.96852e-43
S100A8	1.97461e-46	-1.60158	1	1	2.91353e-42
ITGB4	3.69842e-46	1.06941	0.889	0.318	5.45702e-42
KRT5	6.14729e-45	0.911048	1	0.995	9.07032e-41
SPRR3	7.52558e-44	-2.62306	0.841	0.966	1.1104e-39
IGSF9	1.38822e-43	0.679458	0.635	0.131	2.04831e-39
MTCL1	1.21282e-42	0.87353	0.778	0.231	1.78952e-38
PHGDH	1.27598e-42	0.711844	0.73	0.179	1.88271e-38
CDCA7	1.58555e-42	0.551679	0.556	0.091	2.33948e-38
LARGE2	1.43145e-41	0.721492	0.714	0.175	2.11211e-37
NAB1	2.59607e-41	1.00337	0.889	0.362	3.83049e-37
NPR3	1.10717e-40	0.717993	0.484	0.077	1.63362e-36
SPRR2A	1.25478e-40	-2.05254	0.857	0.975	1.85143e-36
MCM3	4.49661e-40	0.552235	0.571	0.108	6.63476e-36
LAMA5	2.17539e-39	0.922898	0.929	0.414	3.20979e-35
LSP1	3.83525e-39	1.30631	0.952	0.517	5.65891e-35
SYT8	7.08849e-39	0.562664	0.381	0.044	1.04591e-34
FAM110C	3.81316e-38	0.78735	0.778	0.243	5.62632e-34
KTN1	5.74158e-38	0.871731	0.929	0.397	8.4717e-34
CRNN	7.17861e-38	-2.58346	0.373	0.859	1.0592e-33
NINJ1	8.83378e-38	0.679547	0.619	0.147	1.30342e-33
HIST1H3I	9.91975e-38	0.644223	0.619	0.134	1.46366e-33
HIST1H1B	1.37527e-37	1.1884	0.794	0.287	2.02922e-33
KRT13	1.45508e-37	-2.0845	0.976	0.975	2.14697e-33
BCL11A	1.58373e-37	0.749781	0.738	0.217	2.3368e-33
SLC47A2	2.25159e-37	0.828071	0.841	0.298	3.32222e-33
CSTB	3.81133e-37	-1.74324	1	1	5.62362e-33
TFAP2B	4.28882e-37	0.626026	0.421	0.06	6.32816e-33
MYC	5.22893e-37	1.06684	0.976	0.812	7.71529e-33
JDP2	1.35882e-36	0.864672	0.833	0.316	2.00494e-32
LAMB3	1.68462e-36	0.816842	0.857	0.31	2.48565e-32
FGFR2	1.97116e-36	0.707826	0.706	0.206	2.90845e-32
LMO4	2.51761e-36	0.923335	0.952	0.476	3.71473e-32
PTMS	9.11956e-36	0.901013	1	0.848	1.34559e-31
LGR4	1.08574e-35	0.787797	0.833	0.302	1.60201e-31
PRXL2A	1.36271e-35	0.811485	0.754	0.24	2.01068e-31
IRX4	1.49605e-35	0.638799	0.595	0.142	2.20742e-31
TFAP2A	1.61464e-35	0.764719	0.865	0.322	2.3824e-31
SYNE2	1.68128e-35	0.924943	0.944	0.507	2.48073e-31
CHST3	4.40136e-35	0.428699	0.397	0.054	6.4942e-31
MST1R	1.21993e-34	0.59586	0.516	0.106	1.8e-30
JAG2	1.29639e-34	0.774734	0.762	0.248	1.91283e-30
HORMAD1	1.31989e-34	0.682921	0.722	0.213	1.94749e-30
SLC7A1	1.82826e-34	0.849709	0.762	0.272	2.6976e-30
ALDH3A1	2.10624e-34	0.921579	0.976	0.554	3.10776e-30
GIT1	3.96717e-34	0.597918	0.619	0.157	5.85357e-30
CLSTN1	4.58814e-34	0.832718	0.944	0.448	6.7698e-30
LAMA3	6.04122e-34	0.611831	0.675	0.185	8.91382e-30
EEF1G	8.48807e-34	0.719171	1	0.918	1.25242e-29
NOP53	1.01472e-33	0.837226	1	0.678	1.49721e-29
WDR90	1.81991e-33	0.563163	0.556	0.123	2.68528e-29
EIF4B	3.11739e-33	0.778741	0.976	0.633	4.59971e-29
DACT2	3.15026e-33	0.490685	0.476	0.087	4.64821e-29
TROAP	4.30651e-33	0.466815	0.381	0.054	6.35425e-29
IRX2	4.51128e-33	0.47248	0.405	0.062	6.65639e-29
TRIM47	5.15143e-33	0.628102	0.722	0.221	7.60093e-29
CELSR1	5.94723e-33	0.701879	0.738	0.236	8.77514e-29
ARL4C	6.91991e-33	0.752401	0.778	0.281	1.02103e-28
TP63	8.47081e-33	0.884108	0.937	0.474	1.24987e-28
VIPR1	1.11911e-32	0.473182	0.484	0.091	1.65125e-28
ERF	1.36223e-32	0.629049	0.73	0.227	2.00996e-28
AJUBA	1.41208e-32	0.56735	0.627	0.162	2.08352e-28
TENM2	2.00592e-32	0.493607	0.452	0.082	2.95973e-28
GPC1	2.8149e-32	0.825938	0.952	0.485	4.15338e-28
CDHR1	6.47711e-32	0.676396	0.714	0.214	9.55697e-28
TUSC1	6.58513e-32	0.587885	0.603	0.152	9.71635e-28
TPPP3	1.10812e-31	0.985213	0.802	0.326	1.63504e-27
NISCH	1.23353e-31	0.778227	0.921	0.424	1.82008e-27
SOX12	1.50448e-31	0.544265	0.516	0.114	2.21987e-27
RCCD1	2.42399e-31	0.433327	0.429	0.074	3.5766e-27
ARHGEF19	2.49907e-31	0.560195	0.587	0.15	3.68737e-27
GPSM2	2.73005e-31	0.454964	0.413	0.07	4.02819e-27
CCDC57	2.80658e-31	0.537656	0.524	0.117	4.1411e-27
DEK	3.03456e-31	0.735648	0.857	0.36	4.47749e-27
CD44	3.57558e-31	0.715963	1	0.917	5.27577e-27
KIAA1522	3.74752e-31	0.806021	0.889	0.401	5.52947e-27
MAZ	4.26871e-31	0.790938	0.873	0.398	6.29848e-27
PPP1R14C	4.43672e-31	0.690302	0.833	0.31	6.54638e-27
XYLB	5.31126e-31	0.515312	0.46	0.09	7.83676e-27
GSS	5.75278e-31	0.555814	0.651	0.185	8.48822e-27
FAAH	7.53329e-31	0.573372	0.635	0.176	1.11154e-26
MCM7	1.15088e-30	0.663454	0.817	0.307	1.69813e-26
SBSN	1.32286e-30	-1.51831	0.778	0.95	1.95188e-26
CSTA	1.53659e-30	-1.49169	0.651	0.94	2.26724e-26
TAF15	1.6e-30	0.77811	0.944	0.517	2.3608e-26
WNT10A	1.71232e-30	0.586728	0.5	0.112	2.52653e-26
SRSF2	2.06493e-30	0.76168	0.976	0.643	3.04681e-26
KRT4	2.12382e-30	-2.56821	0.357	0.8	3.13369e-26
AURKB	2.18761e-30	0.405532	0.381	0.059	3.22782e-26
STAG1	2.81278e-30	0.528001	0.611	0.164	4.15025e-26
LRRC8D	2.84461e-30	0.506348	0.476	0.098	4.19723e-26
MATN2	2.95011e-30	0.558924	0.571	0.143	4.35289e-26
VAV3	3.08128e-30	0.729777	0.825	0.319	4.54642e-26
SYTL1	3.28689e-30	0.756116	0.889	0.418	4.8498e-26
PILRB	3.64049e-30	0.686634	0.857	0.353	5.37154e-26
HNRNPR	3.68524e-30	0.758019	0.929	0.453	5.43757e-26
TGM3	4.34924e-30	-1.81117	0.619	0.914	6.4173e-26
CACNB4	4.57397e-30	0.431979	0.389	0.063	6.74889e-26
HIST1H2AE	4.94679e-30	0.663796	0.635	0.186	7.29898e-26
SOX21	5.36921e-30	0.679272	0.762	0.262	7.92228e-26
KCNJ15	5.56496e-30	0.582745	0.571	0.147	8.21109e-26
AUTS2	6.58446e-30	0.670435	0.786	0.294	9.71537e-26
GEM	7.80732e-30	0.629731	0.643	0.185	1.15197e-25
NFIX	1.5256e-29	0.731975	0.817	0.33	2.25103e-25
HIST1H1E	2.08484e-29	0.819365	0.968	0.681	3.07619e-25
RASSF10	2.52766e-29	0.500662	0.587	0.151	3.72956e-25
BLCAP	2.61777e-29	0.670218	0.778	0.287	3.86252e-25
BMP7	3.14487e-29	0.624116	0.722	0.24	4.64025e-25
TCOF1	3.44671e-29	0.53512	0.548	0.135	5.08562e-25
SRSF11	3.55212e-29	0.743256	0.968	0.673	5.24115e-25
TMEM237	3.82156e-29	0.501979	0.54	0.13	5.63871e-25
HNRNPD	3.9551e-29	0.816084	0.897	0.494	5.83574e-25
IGKC	4.22162e-29	-3.1455	1	1	6.229e-25
EBPL	5.14782e-29	0.747591	0.857	0.374	7.5956e-25
ARHGEF4	5.63004e-29	0.779724	0.913	0.499	8.30713e-25
ABCC5	6.14012e-29	0.699566	0.849	0.332	9.05975e-25
SLC1A4	7.34344e-29	0.499911	0.548	0.134	1.08353e-24
HIST1H4A	7.38618e-29	0.633247	0.54	0.142	1.08983e-24
IGHA1	8.48844e-29	-2.88451	0.373	0.783	1.25247e-24
ELL3	1.00351e-28	0.361781	0.349	0.052	1.48067e-24
CDT1	1.03219e-28	0.39656	0.349	0.053	1.523e-24
HIST1H2AG	1.3637e-28	0.647371	0.524	0.134	2.01214e-24
DUS3L	1.36994e-28	0.568516	0.667	0.207	2.02134e-24
EEF2	1.60108e-28	0.618906	1	0.958	2.36239e-24
HNRNPUL2	2.26116e-28	0.732381	0.921	0.526	3.33633e-24
SNHG32	2.83972e-28	0.53938	0.627	0.179	4.19e-24
RHCG	2.96546e-28	-1.73967	0.357	0.804	4.37553e-24
CYC1	2.99341e-28	0.668775	0.825	0.333	4.41678e-24
GAS1	3.13605e-28	0.82003	0.952	0.507	4.62725e-24
DSC3	3.79445e-28	0.792929	0.952	0.638	5.5987e-24
TP53	3.86269e-28	0.58839	0.675	0.214	5.6994e-24
UCN2	4.0712e-28	0.354911	0.27	0.029	6.00706e-24
TGIF1	4.28251e-28	0.544412	0.683	0.215	6.31884e-24
ILF3	5.12772e-28	0.789356	0.937	0.583	7.56596e-24
SMARCAD1	5.70723e-28	0.54194	0.508	0.124	8.42101e-24
SLC1A3	7.45506e-28	0.480306	0.516	0.121	1.09999e-23
MT1X	7.4994e-28	0.85152	0.889	0.433	1.10654e-23
DDB2	8.26424e-28	0.513501	0.627	0.181	1.21939e-23
GAMT	9.31667e-28	0.45476	0.444	0.094	1.37467e-23
C19orf48	9.32688e-28	0.543751	0.579	0.162	1.37618e-23
WEE1	9.47379e-28	0.675192	0.746	0.274	1.39786e-23
DDR1	1.11095e-27	0.700195	0.937	0.477	1.63921e-23
HIST1H3G	1.15812e-27	0.368651	0.349	0.054	1.7088e-23
ANAPC5	1.24602e-27	0.639349	0.857	0.36	1.8385e-23
EEF2K	1.43263e-27	0.708388	0.706	0.265	2.11385e-23
CDK4	1.4945e-27	0.549285	0.635	0.19	2.20514e-23
HSPD1	1.60606e-27	0.679494	0.762	0.313	2.36973e-23
CBR1	1.70673e-27	0.828093	0.944	0.628	2.51828e-23
PAICS	1.96419e-27	0.441091	0.492	0.112	2.89817e-23
IP6K2	2.33992e-27	0.717066	0.841	0.388	3.45256e-23
EXT1	2.79429e-27	0.751209	0.738	0.304	4.12297e-23
VWA2	3.03963e-27	0.30788	0.27	0.03	4.48498e-23
UQCRC1	3.44011e-27	0.659595	0.794	0.334	5.07588e-23
LRRC47	3.72484e-27	0.632299	0.754	0.286	5.496e-23
NFIC	4.04343e-27	0.718586	0.921	0.483	5.96608e-23
RSL1D1	4.36352e-27	0.659082	0.77	0.311	6.43838e-23
RUVBL2	4.58609e-27	0.564142	0.698	0.238	6.76678e-23
ACAP3	6.80711e-27	0.76825	0.921	0.59	1.00439e-22
NOP56	7.27789e-27	0.521895	0.675	0.214	1.07385e-22
CENPB	8.59993e-27	0.671792	0.802	0.332	1.26892e-22
SRSF1	9.0017e-27	0.68553	0.905	0.463	1.3282e-22
IGLC1	9.3215e-27	-2.62244	0.23	0.714	1.37539e-22
C1orf21	9.72295e-27	0.535555	0.563	0.16	1.43462e-22
CDCA7L	1.10841e-26	0.403804	0.373	0.067	1.63546e-22
HILPDA	1.23938e-26	0.446113	0.452	0.1	1.8287e-22
KAT2A	1.32268e-26	0.559373	0.635	0.2	1.95162e-22
PRG2	1.37062e-26	0.369024	0.302	0.042	2.02235e-22
MT1E	1.4399e-26	0.649404	0.77	0.29	2.12457e-22
DEGS1	1.97911e-26	0.711497	0.802	0.34	2.92018e-22
SOD1	2.03531e-26	0.716994	0.889	0.436	3.0031e-22
LIG1	2.12316e-26	0.485633	0.484	0.115	3.13272e-22
HIST1H4H	2.17794e-26	0.65388	0.738	0.282	3.21355e-22
CDK10	2.29814e-26	0.500897	0.595	0.175	3.39091e-22
HELLS	2.49969e-26	0.516709	0.508	0.131	3.6883e-22
STMN1	2.60003e-26	0.489167	0.452	0.103	3.83635e-22
CNFN	2.63186e-26	-1.86714	0.508	0.881	3.88331e-22
PA2G4	2.70896e-26	0.676648	0.921	0.451	3.99707e-22
FBF1	3.2263e-26	0.457794	0.468	0.108	4.7604e-22
OSBPL1A	3.86756e-26	0.482392	0.468	0.109	5.70659e-22
NOP14	3.95465e-26	0.534736	0.595	0.18	5.83508e-22
ARRDC4	4.24808e-26	0.563954	0.667	0.218	6.26803e-22
FBXO2	4.32386e-26	0.363021	0.349	0.058	6.37985e-22
HNRNPA3	4.90212e-26	0.674174	0.968	0.728	7.23307e-22
TKT	5.02805e-26	0.636759	0.698	0.256	7.41889e-22
EGFR	5.97195e-26	0.58803	0.802	0.321	8.81162e-22
HNRNPDL	6.51387e-26	0.644501	1	0.842	9.61122e-22
IMPDH2	6.59329e-26	0.591887	0.659	0.223	9.7284e-22
NCL	6.74533e-26	0.710038	0.984	0.757	9.95274e-22
SULF2	8.76343e-26	0.764935	0.81	0.377	1.29304e-21
CA12	9.47048e-26	0.70867	0.817	0.354	1.39737e-21
ENO1	1.00397e-25	0.644957	0.968	0.864	1.48136e-21
KCTD1	1.10413e-25	0.502829	0.619	0.193	1.62915e-21
TRIP6	1.1935e-25	0.628551	0.889	0.41	1.76101e-21
RNASET2	1.3327e-25	0.54998	0.698	0.246	1.96639e-21
IGHG1	1.41377e-25	-2.51285	0.286	0.702	2.08602e-21
IGHG2	1.62381e-25	-2.87404	0.571	0.794	2.39593e-21
PSMG3	1.63709e-25	0.468194	0.595	0.177	2.41553e-21
MIF	1.65449e-25	0.658995	0.976	0.736	2.4412e-21
FAM53B	1.65662e-25	0.580013	0.667	0.232	2.44434e-21
WDR34	1.81226e-25	0.418235	0.413	0.086	2.67399e-21
SETD4	2.02261e-25	0.484099	0.516	0.137	2.98436e-21
APEX1	2.03142e-25	0.631682	0.698	0.267	2.99736e-21
IGFBP2	2.29138e-25	0.786681	0.984	0.661	3.38093e-21
SPRR2D	2.38562e-25	-1.93967	0.484	0.867	3.51999e-21
IGFBP3	2.44679e-25	0.681695	0.635	0.213	3.61024e-21
FAM83F	3.34851e-25	0.507345	0.46	0.112	4.94073e-21
ITGA3	3.4027e-25	0.499899	0.579	0.172	5.02068e-21
NFIB	3.72501e-25	0.529675	0.635	0.205	5.49625e-21
FANCA	4.13148e-25	0.35747	0.341	0.058	6.096e-21
BDP1	4.17566e-25	0.527585	0.619	0.199	6.16118e-21
WDR75	5.04438e-25	0.386699	0.421	0.09	7.44299e-21
PUS7	5.47759e-25	0.425156	0.437	0.099	8.08219e-21
HIST1H2BO	5.53707e-25	0.48695	0.444	0.103	8.16995e-21
MAP3K6	5.60582e-25	0.591291	0.746	0.297	8.27139e-21
HSD17B8	7.01217e-25	0.385125	0.429	0.094	1.03465e-20
MFSD2A	7.30983e-25	0.52057	0.516	0.142	1.07857e-20
TRIB2	7.42543e-25	0.529257	0.532	0.149	1.09562e-20
KRT8	8.63144e-25	0.628203	0.5	0.134	1.27357e-20
HNRNPA2B1	9.2546e-25	0.621895	0.992	0.828	1.36552e-20
PCSK9	9.96867e-25	0.308122	0.278	0.037	1.47088e-20
ABCB6	1.12079e-24	0.421523	0.524	0.138	1.65373e-20
SNRPF	1.28295e-24	0.417115	0.516	0.135	1.893e-20
RNPS1	1.44297e-24	0.540022	0.73	0.272	2.1291e-20
GSR	1.50704e-24	0.619874	0.635	0.219	2.22364e-20
NOTCH1	1.59135e-24	0.519262	0.532	0.152	2.34804e-20
H2AFV	1.62392e-24	0.491386	0.675	0.225	2.39609e-20
AFMID	1.72988e-24	0.475084	0.54	0.153	2.55244e-20
NME2	1.83136e-24	0.711884	0.762	0.342	2.70218e-20
POLD2	2.17294e-24	0.555484	0.659	0.229	3.20617e-20
TK1	2.21371e-24	0.399918	0.333	0.057	3.26633e-20
RTKN	2.22838e-24	0.438448	0.468	0.115	3.28798e-20
ST6GALNAC2	2.31701e-24	0.544924	0.548	0.161	3.41875e-20
DUT	2.51917e-24	0.583562	0.77	0.302	3.71703e-20
NEFL	2.64708e-24	0.666134	0.54	0.167	3.90577e-20
GINS1	2.69696e-24	0.288757	0.27	0.035	3.97937e-20
SUPT16H	2.71772e-24	0.507272	0.595	0.19	4.01e-20
CHAF1A	2.76495e-24	0.411427	0.413	0.09	4.07968e-20
HSP90AB1	2.78501e-24	0.665359	0.952	0.638	4.10928e-20
GOLPH3L	2.79721e-24	0.505314	0.651	0.22	4.12728e-20
PIK3R2	2.92987e-24	0.538809	0.619	0.206	4.32302e-20
DDX51	2.9593e-24	0.436282	0.468	0.116	4.36644e-20
HIST1H4D	3.17152e-24	0.760509	0.651	0.248	4.67957e-20
LDLRAP1	3.28579e-24	0.495208	0.579	0.18	4.84818e-20
MACROD1	3.76297e-24	0.580815	0.627	0.218	5.55226e-20
GABRE	3.78048e-24	0.449927	0.571	0.167	5.57809e-20
TNFRSF19	3.88702e-24	0.611826	0.643	0.225	5.7353e-20
PIK3C2G	4.22064e-24	0.388741	0.413	0.088	6.22755e-20
PTGES2	4.62925e-24	0.559861	0.722	0.27	6.83046e-20
FOXP2	4.78874e-24	0.448475	0.508	0.137	7.06579e-20
CSTF3	4.92982e-24	0.491321	0.556	0.166	7.27395e-20
FBXO44	6.30481e-24	0.47921	0.619	0.201	9.30274e-20
SPRED1	6.39045e-24	0.434494	0.468	0.117	9.42912e-20
HIST1H2BD	6.50617e-24	0.481787	0.563	0.166	9.59985e-20
TYMS	6.68731e-24	0.412139	0.381	0.078	9.86712e-20
MYO19	6.69293e-24	0.532414	0.603	0.201	9.87542e-20
YJU2	6.85027e-24	0.428847	0.548	0.157	1.01076e-19
EXOSC7	7.18309e-24	0.498929	0.603	0.192	1.05987e-19
PHB2	7.26864e-24	0.591989	0.77	0.332	1.07249e-19
PIDD1	7.41414e-24	0.485264	0.611	0.198	1.09396e-19
PATJ	7.65983e-24	0.66396	0.865	0.423	1.13021e-19
MAPKAPK5	8.08064e-24	0.490816	0.587	0.181	1.1923e-19
IRX1	8.6799e-24	0.343389	0.31	0.05	1.28072e-19
TRIM27	8.83893e-24	0.509976	0.54	0.163	1.30418e-19
CDK18	8.98032e-24	0.433131	0.492	0.128	1.32505e-19
PKD1	9.47835e-24	0.597398	0.778	0.328	1.39853e-19
PHIP	9.82277e-24	0.452423	0.579	0.178	1.44935e-19
CRLS1	1.00077e-23	0.540003	0.635	0.218	1.47664e-19
ARL9	1.0437e-23	0.269648	0.222	0.023	1.53998e-19
HIST1H2AD	1.0669e-23	0.499905	0.524	0.15	1.57421e-19
LMNB2	1.12501e-23	0.594423	0.627	0.218	1.65995e-19
IVNS1ABP	1.18892e-23	0.658965	0.921	0.51	1.75425e-19
PTGFRN	1.19214e-23	0.627268	0.722	0.296	1.759e-19
ATP1A1	1.19284e-23	0.635996	0.81	0.353	1.76003e-19
HIST1H2BH	1.19843e-23	0.506849	0.429	0.102	1.76828e-19
NOS1	1.20389e-23	0.353253	0.341	0.062	1.77635e-19
AHCYL2	1.33127e-23	0.506029	0.516	0.15	1.96429e-19
HIST1H2BN	1.35507e-23	0.496062	0.5	0.137	1.99941e-19
SET	1.56091e-23	0.672145	0.929	0.579	2.30313e-19
MAPKBP1	1.86285e-23	0.480168	0.524	0.153	2.74864e-19
HIST1H4C	1.90416e-23	0.508627	0.579	0.183	2.80958e-19
NDUFS6	1.99319e-23	0.604945	0.817	0.386	2.94095e-19
HMGB1	2.045e-23	0.609742	0.841	0.369	3.01739e-19
RHOT2	2.0673e-23	0.537264	0.706	0.267	3.05029e-19
SRRT	2.09364e-23	0.61165	0.817	0.363	3.08917e-19
NUCKS1	2.47714e-23	0.633892	0.929	0.491	3.65503e-19
CLEC7A	2.48149e-23	0.513251	0.635	0.219	3.66144e-19
MCM4	2.51857e-23	0.42032	0.444	0.108	3.71615e-19
INCENP	2.83083e-23	0.493081	0.611	0.206	4.17688e-19
GLRX5	2.87233e-23	0.557643	0.69	0.265	4.23813e-19
NSG1	3.19787e-23	0.708697	0.794	0.373	4.71845e-19
CCT2	3.44804e-23	0.517964	0.651	0.229	5.08759e-19
CCDC146	3.46817e-23	0.41453	0.492	0.129	5.11729e-19
MYBBP1A	3.72172e-23	0.525796	0.627	0.217	5.4914e-19
SLC12A2	3.86765e-23	0.446166	0.508	0.14	5.70672e-19
GCLC	4.1917e-23	0.576161	0.635	0.229	6.18486e-19
SLC27A3	4.24308e-23	0.436918	0.508	0.138	6.26066e-19
DAPL1	4.73029e-23	0.520197	0.643	0.221	6.97954e-19
APCDD1	5.25612e-23	0.642746	0.683	0.258	7.75541e-19
METTL3	5.31038e-23	0.461637	0.611	0.2	7.83547e-19
UHRF1	5.59798e-23	0.354657	0.325	0.058	8.25981e-19
HIST1H3D	5.74617e-23	0.673119	0.556	0.186	8.47847e-19
NUSAP1	5.81628e-23	0.429196	0.365	0.075	8.58192e-19
HSPA2	6.26804e-23	0.554102	0.683	0.249	9.24849e-19
COL4A5	6.29728e-23	0.411076	0.405	0.091	9.29163e-19
QTRT1	6.33454e-23	0.548333	0.643	0.234	9.34661e-19
SEPTIN10	7.14205e-23	0.512281	0.69	0.258	1.05381e-18
MAL	7.48966e-23	-1.97428	0.27	0.688	1.1051e-18
CTBP1	7.90357e-23	0.656026	0.881	0.479	1.16617e-18
DUSP23	8.24351e-23	0.481787	0.563	0.179	1.21633e-18
CPT1B	8.36324e-23	0.409051	0.476	0.125	1.234e-18
CEP68	8.49031e-23	0.51177	0.548	0.172	1.25275e-18
MLLT6	8.58041e-23	0.648346	0.833	0.392	1.26604e-18
SLC43A3	8.85413e-23	0.504263	0.5	0.144	1.30643e-18
HINT1	9.53651e-23	0.586752	0.754	0.325	1.40711e-18
HNRNPA0	9.78474e-23	0.627268	0.976	0.61	1.44374e-18
TRAK1	1.10631e-22	0.577254	0.762	0.316	1.63237e-18
TSPOAP1	1.10868e-22	0.374924	0.365	0.075	1.63585e-18
HIVEP3	1.11498e-22	0.388072	0.452	0.112	1.64516e-18
UXT	1.13907e-22	0.381439	0.397	0.089	1.6807e-18
ZNF783	1.28743e-22	0.537795	0.69	0.257	1.8996e-18
BOP1	1.36958e-22	0.450148	0.571	0.179	2.02081e-18
FGFR3	1.38696e-22	0.610685	0.841	0.371	2.04645e-18
PCNX2	1.41926e-22	0.502981	0.492	0.141	2.09413e-18
NDUFV1	1.46206e-22	0.663217	0.825	0.415	2.15728e-18
MTHFD1	1.53956e-22	0.471225	0.476	0.133	2.27162e-18
ENGASE	1.57185e-22	0.433635	0.452	0.117	2.31927e-18
LRFN4	1.72108e-22	0.386699	0.397	0.09	2.53945e-18
EIF3K	1.72191e-22	0.581314	0.786	0.344	2.54067e-18
POLR3E	1.75515e-22	0.482625	0.532	0.162	2.58972e-18
PYGB	1.80322e-22	0.504694	0.579	0.189	2.66065e-18
MFN2	1.87272e-22	0.50576	0.635	0.23	2.7632e-18
BBS2	1.87593e-22	0.423126	0.579	0.18	2.76794e-18
GTPBP6	2.03927e-22	0.526621	0.73	0.286	3.00894e-18
AMOTL1	2.13962e-22	0.573264	0.778	0.346	3.15701e-18
IMPA2	2.22039e-22	0.651279	0.849	0.414	3.27618e-18
BRIP1	2.5459e-22	0.2826	0.262	0.037	3.75647e-18
XPC	2.55382e-22	0.470941	0.698	0.254	3.76817e-18
GLCE	2.6271e-22	0.368057	0.389	0.086	3.87629e-18
RAB7B	2.68996e-22	0.492722	0.603	0.202	3.96903e-18
MZF1	2.72384e-22	0.365122	0.405	0.093	4.01902e-18
THOC6	2.93879e-22	0.385547	0.381	0.084	4.33618e-18
AKAP1	3.04694e-22	0.415114	0.5	0.138	4.49575e-18
CCDC6	3.05927e-22	0.57146	0.802	0.361	4.51396e-18
SYT17	3.07827e-22	0.320059	0.27	0.041	4.54198e-18
TGFBI	3.13775e-22	0.541441	0.627	0.227	4.62975e-18
SFPQ	3.15652e-22	0.595041	0.984	0.805	4.65745e-18
VSNL1	3.93519e-22	0.582993	0.675	0.256	5.80637e-18
EIF2D	3.94404e-22	0.387179	0.429	0.104	5.81944e-18
UBAP2L	4.1811e-22	0.530027	0.667	0.254	6.16921e-18
LGR6	4.30478e-22	0.368898	0.27	0.041	6.35171e-18
HNRNPH3	4.67787e-22	0.53658	0.81	0.343	6.9022e-18
GTF2I	4.76994e-22	0.607074	0.96	0.572	7.03805e-18
ZNF276	4.82216e-22	0.545071	0.667	0.255	7.11509e-18
KIAA1671	5.05083e-22	0.600417	0.73	0.321	7.4525e-18
WDR74	5.28023e-22	0.411376	0.444	0.115	7.79098e-18
PRKX	5.70239e-22	0.574027	0.746	0.304	8.41387e-18
CRCT1	5.70328e-22	-2.03972	0.397	0.767	8.41519e-18
TTL	6.21921e-22	0.378707	0.397	0.093	9.17645e-18
AGRN	6.5702e-22	0.495208	0.651	0.232	9.69434e-18
ACTR1B	6.90109e-22	0.506766	0.69	0.264	1.01826e-17
SLC2A4RG	7.27115e-22	0.607284	0.881	0.435	1.07286e-17
LTB4R	7.88153e-22	0.715515	0.913	0.615	1.16292e-17
CCAR1	8.12667e-22	0.477791	0.651	0.233	1.19909e-17
D2HGDH	8.15724e-22	0.55101	0.675	0.262	1.2036e-17
GJA3	8.38488e-22	0.360287	0.317	0.059	1.23719e-17
IVL	9.2711e-22	-1.20894	0.563	0.876	1.36795e-17
CTNNAL1	9.41188e-22	0.428382	0.46	0.122	1.38872e-17
NPHP3	9.75544e-22	0.459376	0.54	0.168	1.43941e-17
MOB3B	9.80658e-22	0.411427	0.397	0.095	1.44696e-17
TFAP4	9.90001e-22	0.350449	0.333	0.065	1.46075e-17
ZNF692	1.09228e-21	0.474947	0.619	0.214	1.61166e-17
DZIP1L	1.09247e-21	0.350417	0.357	0.075	1.61194e-17
TNK2	1.10926e-21	0.530078	0.77	0.332	1.63671e-17
RACK1	1.18151e-21	0.586398	0.96	0.73	1.74331e-17
TARBP1	1.20661e-21	0.425789	0.476	0.132	1.78036e-17
HIST1H3A	1.23694e-21	0.377851	0.349	0.073	1.8251e-17
CDH13	1.23756e-21	0.351755	0.373	0.081	1.82602e-17
PRPF6	1.25058e-21	0.466414	0.706	0.265	1.84523e-17
PPAN	1.37213e-21	0.503673	0.516	0.163	2.02458e-17
TIA1	1.37877e-21	0.520103	0.706	0.277	2.03438e-17
ANXA1	1.43203e-21	-1.35165	0.992	0.989	2.11297e-17
PLXNB1	1.49845e-21	0.640086	0.865	0.423	2.21097e-17
EIF2S3	1.52162e-21	0.57316	0.817	0.395	2.24515e-17
RAPGEF5	1.54449e-21	0.386267	0.397	0.093	2.2789e-17
OBSL1	1.58825e-21	0.458302	0.675	0.241	2.34346e-17
ADSS	1.62534e-21	0.441994	0.563	0.181	2.39818e-17
PACSIN3	1.74105e-21	0.528017	0.619	0.23	2.56892e-17
EPHB4	1.87623e-21	0.524354	0.659	0.253	2.76838e-17
HNRNPH1	2.08825e-21	0.651531	0.96	0.769	3.08121e-17
NONO	2.1736e-21	0.572891	0.873	0.432	3.20714e-17
GAL3ST4	2.201e-21	0.293753	0.286	0.048	3.24757e-17
CBX5	2.31211e-21	0.542244	0.667	0.258	3.41151e-17
TBRG4	2.31562e-21	0.434544	0.587	0.194	3.4167e-17
COMT	2.3178e-21	0.614252	0.825	0.414	3.41992e-17
PITPNM3	2.32641e-21	0.467232	0.595	0.203	3.43262e-17
PDHA1	2.48718e-21	0.4929	0.579	0.198	3.66984e-17
SCIN	2.567e-21	0.372035	0.365	0.079	3.7876e-17
EFTUD2	2.59257e-21	0.454219	0.579	0.195	3.82533e-17
PLEKHG3	2.64193e-21	0.497804	0.619	0.213	3.89817e-17
RABGGTB	2.67475e-21	0.523889	0.595	0.215	3.9466e-17
PPP2R3B	3.01124e-21	0.38451	0.421	0.105	4.44308e-17
C6orf141	3.04932e-21	0.36658	0.381	0.086	4.49926e-17
ZC3HAV1L	3.09142e-21	0.347651	0.373	0.083	4.5614e-17
KAT14	3.1203e-21	0.350355	0.397	0.093	4.604e-17
MPPED1	3.1267e-21	0.29095	0.206	0.023	4.61344e-17
MAF	3.20678e-21	0.560622	1	0.888	4.7316e-17
CAD	3.37624e-21	0.414288	0.444	0.117	4.98164e-17
ATP5ME	3.44188e-21	0.631325	0.849	0.473	5.07849e-17
CCT3	3.54303e-21	0.572048	0.762	0.343	5.22774e-17
UBE2C	3.62518e-21	0.347651	0.302	0.054	5.34896e-17
AMPD2	4.30825e-21	0.325326	0.349	0.073	6.35682e-17
DYNLL2	4.63461e-21	0.563547	0.77	0.341	6.83837e-17
LAPTM4B	4.69173e-21	0.446944	0.571	0.188	6.92265e-17
ITGA6	4.89734e-21	0.571635	0.683	0.274	7.22602e-17
HIP1	5.40967e-21	0.346285	0.373	0.083	7.98196e-17
CLASRP	5.55909e-21	0.480333	0.69	0.269	8.20243e-17
PLEKHG5	5.5855e-21	0.583606	0.754	0.337	8.2414e-17
FNBP4	5.58878e-21	0.50377	0.706	0.282	8.24624e-17
ANP32B	5.59759e-21	0.546258	0.69	0.288	8.25925e-17
CDC7	5.67664e-21	0.285874	0.262	0.041	8.37588e-17
NUDT3	5.71059e-21	0.501929	0.659	0.255	8.42597e-17
GADD45GIP1	5.74313e-21	0.542411	0.714	0.301	8.47399e-17
CYP2S1	5.89503e-21	0.468287	0.563	0.185	8.69812e-17
PMEL	6.0583e-21	0.418651	0.278	0.048	8.93902e-17
TRIM28	6.51742e-21	0.587321	0.794	0.372	9.61645e-17
VANGL2	6.54106e-21	0.415686	0.508	0.153	9.65134e-17
COLGALT1	6.87773e-21	0.535109	0.627	0.239	1.01481e-16
DHPS	6.91376e-21	0.48967	0.683	0.267	1.02013e-16
RUVBL1	7.70062e-21	0.377694	0.437	0.113	1.13623e-16
TFDP1	7.90144e-21	0.496173	0.627	0.233	1.16586e-16
OTUD3	8.0104e-21	0.329694	0.365	0.08	1.18193e-16
SHTN1	8.07276e-21	0.463036	0.587	0.201	1.19114e-16
LDB1	8.11532e-21	0.605632	0.857	0.449	1.19742e-16
WDR6	8.65876e-21	0.594406	0.73	0.321	1.2776e-16
LRP5L	8.94047e-21	0.354537	0.349	0.075	1.31917e-16
MCM5	9.19872e-21	0.437848	0.54	0.169	1.35727e-16
SMARCE1	1.05759e-20	0.532281	0.754	0.319	1.56047e-16
CLUH	1.09511e-20	0.531984	0.619	0.236	1.61584e-16
PLCH2	1.11131e-20	0.529908	0.69	0.279	1.63973e-16
SLC9A3	1.11591e-20	0.566879	0.627	0.239	1.64652e-16
POMGNT1	1.13401e-20	0.432687	0.484	0.141	1.67323e-16
LSM7	1.14576e-20	0.501061	0.619	0.231	1.69057e-16
ANKRD36C	1.17798e-20	0.514693	0.69	0.274	1.7381e-16
UQCC3	1.18203e-20	0.376066	0.46	0.127	1.74408e-16
NDUFB7	1.21384e-20	0.545665	0.802	0.379	1.79102e-16
ASPSCR1	1.21828e-20	0.399657	0.476	0.136	1.79757e-16
MBLAC2	1.22717e-20	0.304323	0.286	0.05	1.81068e-16
CDC42BPG	1.3467e-20	0.511669	0.746	0.31	1.98706e-16
CNTROB	1.35917e-20	0.408733	0.5	0.15	2.00546e-16
CAPN3	1.40014e-20	0.425234	0.421	0.11	2.0659e-16
DHX15	1.438e-20	0.524371	0.754	0.332	2.12177e-16
FOXK1	1.4569e-20	0.454735	0.595	0.205	2.14966e-16
SIVA1	1.49769e-20	0.497093	0.802	0.346	2.20984e-16
SETD6	1.5409e-20	0.401651	0.405	0.102	2.2736e-16
MTA1	1.63442e-20	0.509402	0.619	0.234	2.41158e-16
CPSF6	1.79341e-20	0.550378	0.675	0.275	2.64618e-16
MT2A	1.80048e-20	0.490908	0.746	0.307	2.65661e-16
SPINK7	1.84422e-20	-1.78867	0.278	0.691	2.72115e-16
PCLAF	1.90426e-20	0.285199	0.278	0.047	2.80974e-16
NSD2	1.95853e-20	0.38675	0.437	0.117	2.88981e-16
TLE5	1.95853e-20	0.618989	0.96	0.659	2.88982e-16
MEGF6	1.96435e-20	0.511291	0.778	0.327	2.8984e-16
CHTF18	2.0677e-20	0.34489	0.349	0.076	3.05088e-16
ADGRA3	2.12529e-20	0.354459	0.373	0.086	3.13587e-16
SPRR1B	2.13335e-20	-1.21966	0.278	0.663	3.14775e-16
GRHL2	2.23014e-20	0.58469	0.675	0.291	3.29057e-16
EFNB3	2.3025e-20	0.28625	0.262	0.042	3.39734e-16
SLPI	2.37562e-20	-1.20683	0.413	0.748	3.50522e-16
HSF2	2.41868e-20	0.350417	0.349	0.077	3.56876e-16
TMPO	2.79366e-20	0.412897	0.484	0.142	4.12205e-16
FAM83H	2.8458e-20	0.5954	0.865	0.443	4.19898e-16
SYNGAP1	3.01089e-20	0.477539	0.524	0.174	4.44257e-16
SLC25A12	3.26948e-20	0.39656	0.492	0.144	4.82412e-16
CLN6	3.43134e-20	0.40342	0.421	0.11	5.06294e-16
EEF1B2	3.68376e-20	0.612221	0.889	0.518	5.43538e-16
NCAPD3	3.97848e-20	0.40938	0.437	0.121	5.87025e-16
AKAP9	4.0369e-20	0.55107	0.683	0.289	5.95645e-16
ADAMTS13	4.0483e-20	0.266288	0.254	0.04	5.97326e-16
PHYHD1	4.06096e-20	0.374319	0.397	0.099	5.99194e-16
LPAR6	4.52208e-20	0.607651	0.698	0.315	6.67232e-16
WNT7B	4.66138e-20	0.460744	0.532	0.176	6.87787e-16
DDX11	4.72676e-20	0.344874	0.341	0.075	6.97434e-16
WNT2B	4.76737e-20	0.387854	0.421	0.109	7.03425e-16
ARL6IP4	5.08621e-20	0.555575	0.905	0.491	7.50471e-16
TMEM43	5.79276e-20	0.521309	0.754	0.338	8.54721e-16
GRIP1	5.79889e-20	0.35698	0.405	0.102	8.55627e-16
ADSL	5.87993e-20	0.378845	0.444	0.123	8.67584e-16
HIST1H3H	5.90516e-20	0.404437	0.421	0.111	8.71306e-16
ZC3H8	6.21377e-20	0.386125	0.46	0.131	9.16842e-16
MIPEP	6.24678e-20	0.290896	0.278	0.049	9.21712e-16
TCF20	6.45079e-20	0.509506	0.619	0.242	9.51814e-16
NCBP2	6.59639e-20	0.45815	0.587	0.209	9.73297e-16
UBA52	6.60164e-20	0.485548	0.992	0.921	9.74073e-16
CCDC3	6.78137e-20	0.45262	0.524	0.17	1.00059e-15
DDX39B	7.15658e-20	0.55103	0.952	0.574	1.05595e-15
MOK	7.26567e-20	0.328098	0.333	0.071	1.07205e-15
PAXBP1	7.34657e-20	0.461509	0.667	0.255	1.08399e-15
TTC9C	7.4445e-20	0.405754	0.429	0.117	1.09844e-15
PER2	7.50853e-20	0.503508	0.635	0.247	1.10788e-15
PEMT	7.76642e-20	0.384309	0.421	0.111	1.14593e-15
LCAT	7.77457e-20	0.439955	0.452	0.129	1.14714e-15
OAS3	7.91559e-20	0.434065	0.595	0.21	1.16795e-15
MT1G	8.02911e-20	0.362932	0.317	0.065	1.18469e-15
NAPEPLD	8.20093e-20	0.318078	0.325	0.068	1.21005e-15
NMRAL1	8.64933e-20	0.472609	0.635	0.237	1.27621e-15
KCNK10	8.6766e-20	0.311455	0.27	0.047	1.28023e-15
NLRP1	8.75213e-20	0.513944	0.69	0.279	1.29138e-15
GEN1	8.75327e-20	0.30534	0.333	0.071	1.29155e-15
DDX21	8.85303e-20	0.435858	0.643	0.239	1.30626e-15
SLC7A5	8.92207e-20	0.354537	0.317	0.064	1.31645e-15
IL1RN	8.94161e-20	-1.17878	0.746	0.916	1.31934e-15
RBM6	9.06487e-20	0.555059	0.786	0.372	1.33752e-15
HNRNPC	9.15316e-20	0.568814	0.849	0.445	1.35055e-15
TUBGCP3	9.73978e-20	0.356928	0.413	0.107	1.4371e-15
ELMO3	9.79736e-20	0.383528	0.452	0.127	1.4456e-15
CNPY2	9.83095e-20	0.471318	0.532	0.182	1.45056e-15
SOX7	1.02876e-19	0.452222	0.508	0.165	1.51793e-15
FAM207A	1.03652e-19	0.351732	0.373	0.089	1.52939e-15
MDM4	1.06683e-19	0.576851	0.794	0.379	1.5741e-15
DCAF8	1.07923e-19	0.469466	0.865	0.397	1.5924e-15
BUD23	1.09071e-19	0.436187	0.556	0.189	1.60935e-15
CAV2	1.11164e-19	0.478797	0.651	0.257	1.64023e-15
ALDH4A1	1.12033e-19	0.332529	0.365	0.085	1.65304e-15
ENOSF1	1.12679e-19	0.485377	0.54	0.19	1.66258e-15
PAN2	1.16943e-19	0.419162	0.444	0.129	1.72549e-15
DDX54	1.17524e-19	0.487177	0.595	0.226	1.73406e-15
SLC38A5	1.20157e-19	0.409051	0.421	0.114	1.77292e-15
PNN	1.28697e-19	0.501145	0.706	0.298	1.89892e-15
FGD6	1.29286e-19	0.364834	0.421	0.112	1.90762e-15
PHKA2	1.31477e-19	0.358498	0.365	0.086	1.93994e-15
CCDC88C	1.32218e-19	0.517184	0.595	0.226	1.95087e-15
ACCS	1.34488e-19	0.351709	0.381	0.094	1.98436e-15
VASP	1.3815e-19	0.45099	0.595	0.22	2.0384e-15
AGO1	1.41589e-19	0.412897	0.468	0.139	2.08914e-15
PFKM	1.50162e-19	0.340836	0.373	0.089	2.21565e-15
CTDSPL	1.53147e-19	0.394748	0.46	0.134	2.25969e-15
NDE1	1.55166e-19	0.415429	0.556	0.187	2.28948e-15
TNFRSF25	1.60346e-19	0.538396	0.675	0.272	2.3659e-15
GGA2	1.63034e-19	0.439393	0.556	0.191	2.40557e-15
BCS1L	1.65355e-19	0.439955	0.46	0.137	2.43981e-15
TXLNA	1.66289e-19	0.476384	0.714	0.297	2.45359e-15
DNPH1	1.6694e-19	0.444528	0.571	0.203	2.4632e-15
ILKAP	1.69166e-19	0.405887	0.508	0.162	2.49604e-15
TXN2	1.69849e-19	0.412488	0.508	0.16	2.50612e-15
HP1BP3	1.72179e-19	0.57944	0.873	0.464	2.5405e-15
TACC3	1.73835e-19	0.310693	0.31	0.062	2.56494e-15
XAF1	1.73916e-19	0.553035	0.683	0.28	2.56613e-15
KMT5C	1.76659e-19	0.34489	0.349	0.08	2.60661e-15
GLMN	1.83076e-19	0.339238	0.317	0.067	2.70129e-15
MYOF	1.83419e-19	0.470764	0.825	0.359	2.70634e-15
NDUFS5	1.92217e-19	0.526528	0.817	0.403	2.83617e-15
PABPC4	2.10499e-19	0.569896	0.714	0.322	3.10591e-15
GART	2.11475e-19	0.440449	0.524	0.176	3.12031e-15
KLHDC4	2.16021e-19	0.381687	0.476	0.141	3.18739e-15
TCERG1	2.27242e-19	0.501305	0.746	0.322	3.35296e-15
LONP2	2.28026e-19	0.444113	0.476	0.148	3.36453e-15
HDGF	2.37452e-19	0.558988	0.968	0.704	3.50361e-15
PITPNB	2.45291e-19	0.439317	0.635	0.238	3.61927e-15
BICD2	2.55526e-19	0.534272	0.984	0.749	3.77029e-15
POLDIP3	2.57473e-19	0.471494	0.643	0.254	3.79902e-15
EXOSC6	2.59134e-19	0.480983	0.643	0.249	3.82352e-15
SPINK5	2.66169e-19	-1.30347	0.508	0.84	3.92733e-15
RPAIN	2.8568e-19	0.414765	0.484	0.151	4.21521e-15
SPARC	3.00815e-19	-2.24017	0.722	0.763	4.43853e-15
CRAMP1	3.10368e-19	0.396313	0.532	0.173	4.57947e-15
UQCR11	3.23246e-19	0.474248	0.714	0.306	4.7695e-15
PTGES3	3.58303e-19	0.556358	0.96	0.682	5.28676e-15
MPST	3.64831e-19	0.474248	0.714	0.296	5.38308e-15
HAUS6	3.78778e-19	0.302563	0.325	0.07	5.58887e-15
POLE3	4.19856e-19	0.445701	0.524	0.175	6.19498e-15
BAG1	4.33022e-19	0.593958	0.849	0.474	6.38924e-15
PRRC2B	4.46837e-19	0.558697	0.944	0.571	6.59308e-15
INF2	4.54209e-19	0.547073	0.841	0.424	6.70185e-15
BTBD2	4.55172e-19	0.398235	0.579	0.203	6.71606e-15
SPTSSA	4.71255e-19	0.399765	0.524	0.169	6.95337e-15
RERE	4.72173e-19	0.472141	0.73	0.313	6.96691e-15
PTPN1	4.76044e-19	0.460182	0.659	0.263	7.02403e-15
ZNF621	4.86565e-19	0.374026	0.405	0.108	7.17927e-15
FASTKD1	4.97148e-19	0.355871	0.349	0.082	7.33541e-15
SMO	5.00045e-19	0.383914	0.437	0.125	7.37816e-15
P2RY11	5.11605e-19	0.338119	0.373	0.091	7.54873e-15
UBR2	5.13854e-19	0.378185	0.468	0.139	7.58191e-15
SNRPC	5.32767e-19	0.522272	0.659	0.283	7.86098e-15
RRM1	5.37229e-19	0.399313	0.508	0.162	7.92681e-15
RAD50	5.53034e-19	0.4198	0.532	0.18	8.16001e-15
SAPCD2	5.73074e-19	0.285574	0.286	0.054	8.4557e-15
FXR1	5.82202e-19	0.444259	0.548	0.189	8.5904e-15
DAZAP1	6.24628e-19	0.515178	0.738	0.345	9.21639e-15
ALDH2	6.5307e-19	0.551675	0.77	0.361	9.63605e-15
MSH6	6.53408e-19	0.343581	0.381	0.097	9.64103e-15
CEP250	6.61765e-19	0.399933	0.46	0.14	9.76434e-15
TFAP2C	7.11888e-19	0.487177	0.579	0.219	1.05039e-14
SLC39A1	7.13203e-19	0.423418	0.587	0.209	1.05233e-14
TBCD	7.2178e-19	0.443788	0.54	0.182	1.06499e-14
INTS11	7.24112e-19	0.467945	0.603	0.233	1.06843e-14
RILPL1	7.27514e-19	0.418397	0.508	0.165	1.07345e-14
PLP2	7.32865e-19	0.524196	0.849	0.428	1.08134e-14
HIST1H2BI	7.34374e-19	0.329797	0.357	0.085	1.08357e-14
ATN1	7.74053e-19	0.583861	0.897	0.501	1.14211e-14
TRAF7	7.78609e-19	0.500723	0.69	0.294	1.14884e-14
TRA2A	7.79268e-19	0.543874	0.921	0.517	1.14981e-14
NAT10	8.63194e-19	0.391333	0.437	0.126	1.27364e-14
HEATR1	8.96996e-19	0.388727	0.437	0.126	1.32352e-14
FJX1	9.1068e-19	0.324931	0.302	0.062	1.34371e-14
NUP188	9.12643e-19	0.367173	0.421	0.115	1.3466e-14
DDX42	9.24144e-19	0.473182	0.69	0.292	1.36357e-14
SRM	9.25196e-19	0.441389	0.5	0.165	1.36513e-14
EPPK1	9.48725e-19	0.607472	0.984	0.744	1.39984e-14
WWOX	9.58115e-19	0.453373	0.579	0.215	1.4137e-14
LMNA	1.09087e-18	0.479866	0.992	0.92	1.60957e-14
WDR43	1.13232e-18	0.395285	0.476	0.148	1.67074e-14
OBSCN	1.13983e-18	0.362338	0.389	0.102	1.68183e-14
METTL8	1.16468e-18	0.339383	0.349	0.083	1.71849e-14
CCDC106	1.20819e-18	0.358318	0.405	0.11	1.78268e-14
ZFP62	1.28538e-18	0.319799	0.341	0.079	1.89658e-14
DEF6	1.29457e-18	0.469247	0.643	0.259	1.91014e-14
TRAP1	1.33584e-18	0.53038	0.802	0.383	1.97103e-14
A2ML1	1.39748e-18	-1.08472	0.286	0.68	2.06199e-14
ITPR2	1.4039e-18	0.483825	0.635	0.255	2.07145e-14
CYREN	1.46594e-18	0.402915	0.54	0.184	2.163e-14
MCM2	1.49097e-18	0.295499	0.27	0.05	2.19993e-14
TMEM129	1.49777e-18	0.378974	0.484	0.152	2.20997e-14
PDGFC	1.50183e-18	0.253675	0.23	0.035	2.21595e-14
RTN4RL1	1.61607e-18	0.268216	0.254	0.044	2.38451e-14
CFAP97	1.63066e-18	0.384629	0.46	0.14	2.40603e-14
URI1	1.69934e-18	0.426039	0.548	0.192	2.50737e-14
IARS	1.75927e-18	0.382603	0.437	0.129	2.5958e-14
KDSR	1.77505e-18	0.508175	0.635	0.261	2.61909e-14
SPSB1	1.8341e-18	0.378185	0.468	0.144	2.70622e-14
TEPSIN	1.85923e-18	0.351576	0.437	0.126	2.7433e-14
SLC2A1	1.8612e-18	0.53658	0.738	0.327	2.74621e-14
FANCI	1.96531e-18	0.277688	0.27	0.05	2.89981e-14
SUMF2	2.00897e-18	0.458038	0.603	0.233	2.96424e-14
GSTM3	2.09011e-18	0.3463	0.381	0.099	3.08396e-14
PAPOLA	2.14717e-18	0.532036	0.778	0.364	3.16815e-14
SLC39A6	2.14729e-18	0.480419	0.532	0.191	3.16832e-14
CCDC47	2.16956e-18	0.52741	0.762	0.37	3.20119e-14
MRE11	2.22951e-18	0.324348	0.357	0.086	3.28965e-14
CHSY1	2.31153e-18	0.445478	0.532	0.189	3.41066e-14
MAPRE3	2.32276e-18	0.338173	0.381	0.099	3.42723e-14
OGT	2.34511e-18	0.518786	0.825	0.402	3.4602e-14
LTV1	2.43131e-18	0.362338	0.389	0.104	3.5874e-14
PCOLCE	2.44473e-18	-1.27457	0.27	0.604	3.60719e-14
PLCD4	2.45721e-18	0.250185	0.222	0.033	3.62561e-14
LARS	2.46733e-18	0.417336	0.524	0.181	3.64055e-14
NDUFS8	2.47638e-18	0.472624	0.643	0.259	3.6539e-14
SMC5	2.50616e-18	0.43254	0.54	0.192	3.69783e-14
CDIP1	2.72422e-18	0.37374	0.429	0.125	4.01958e-14
KRI1	2.83124e-18	0.424519	0.556	0.2	4.17749e-14
GMPS	2.91235e-18	0.400669	0.46	0.142	4.29718e-14
CHGA	2.94206e-18	0.294688	0.135	0.009	4.341e-14
SH3BP4	2.98989e-18	0.342196	0.365	0.093	4.41158e-14
PPARGC1B	3.06309e-18	0.319636	0.325	0.074	4.5196e-14
TYSND1	3.08124e-18	0.405079	0.532	0.182	4.54637e-14
TTC21B	3.08759e-18	0.307889	0.302	0.063	4.55574e-14
CARD10	3.11225e-18	0.294398	0.286	0.057	4.59212e-14
KHSRP	3.11368e-18	0.577024	0.786	0.414	4.59424e-14
ANKS1B	3.14967e-18	0.308831	0.27	0.051	4.64733e-14
DLL1	3.29926e-18	0.384918	0.365	0.094	4.86806e-14
QARS	3.35894e-18	0.484586	0.73	0.327	4.95612e-14
TOP1MT	3.49154e-18	0.370039	0.405	0.112	5.15177e-14
CSE1L	3.51461e-18	0.423886	0.508	0.173	5.18581e-14
RNF8	3.62782e-18	0.33413	0.381	0.099	5.35284e-14
XYLT2	3.63439e-18	0.353095	0.357	0.089	5.36255e-14
S100A2	3.73518e-18	0.547026	0.992	0.858	5.51125e-14
SNRNP70	3.92005e-18	0.518085	0.984	0.757	5.78403e-14
MAVS	3.92359e-18	0.446955	0.603	0.233	5.78926e-14
UBE2E3	3.92749e-18	0.527771	0.762	0.376	5.79502e-14
POLR1A	4.0441e-18	0.411328	0.444	0.138	5.96707e-14
E2F4	4.27646e-18	0.435523	0.603	0.232	6.30992e-14
RPP21	4.33948e-18	0.360295	0.476	0.148	6.4029e-14
DFFA	4.43825e-18	0.352803	0.452	0.135	6.54863e-14
EIF4A2	4.54952e-18	0.575285	0.81	0.398	6.71281e-14
ARIH1	4.55304e-18	0.492585	0.802	0.397	6.71801e-14
ATF3	4.57464e-18	0.579732	0.571	0.223	6.74988e-14
PWWP3A	4.81004e-18	0.406932	0.548	0.192	7.09721e-14
PTPRF	4.81974e-18	0.572438	0.817	0.418	7.11153e-14
POLA1	4.82697e-18	0.33413	0.381	0.1	7.1222e-14
UBL4A	5.01163e-18	0.350325	0.389	0.105	7.39466e-14
SUGP2	5.14792e-18	0.390573	0.5	0.163	7.59576e-14
EHBP1	5.1978e-18	0.437956	0.579	0.218	7.66936e-14
FAM83B	5.21525e-18	0.454284	0.754	0.318	7.6951e-14
UBE2G2	5.2376e-18	0.4614	0.754	0.33	7.72808e-14
FOXK2	5.26899e-18	0.458421	0.579	0.222	7.77439e-14
ZNF146	5.36671e-18	0.381687	0.476	0.152	7.91858e-14
SKP2	5.40933e-18	0.33651	0.317	0.072	7.98147e-14
AGER	5.74644e-18	0.413405	0.5	0.166	8.47888e-14
ZNF451	5.98227e-18	0.40414	0.532	0.184	8.82683e-14
HSPA9	6.52621e-18	0.467352	0.698	0.31	9.62942e-14
PKP4	6.57478e-18	0.421765	0.635	0.249	9.70108e-14
TMEM189	6.9904e-18	0.377025	0.643	0.251	1.03143e-13
PRKDC	7.12156e-18	0.432125	0.548	0.199	1.05079e-13
STK36	7.23229e-18	0.318078	0.31	0.069	1.06712e-13
TLCD3A	7.33954e-18	0.470321	0.603	0.231	1.08295e-13
MKI67	7.42135e-18	0.383616	0.294	0.063	1.09502e-13
TSTA3	7.52399e-18	0.470841	0.579	0.226	1.11017e-13
FARSA	7.78851e-18	0.41332	0.524	0.183	1.14919e-13
ITPR3	7.90318e-18	0.50822	0.746	0.34	1.16611e-13
BAHCC1	7.97951e-18	0.399459	0.405	0.115	1.17738e-13
GNL1	8.02567e-18	0.433703	0.556	0.208	1.18419e-13
PLEC	8.45152e-18	0.516935	0.968	0.821	1.24702e-13
FTSJ3	8.47306e-18	0.382061	0.5	0.162	1.2502e-13
SESN3	8.52694e-18	0.391043	0.659	0.26	1.25815e-13
NRBP2	8.60209e-18	0.418374	0.579	0.214	1.26924e-13
FBRSL1	8.745e-18	0.400296	0.516	0.178	1.29033e-13
ELP5	8.87348e-18	0.307438	0.349	0.085	1.30928e-13
MED13L	8.95365e-18	0.541732	0.865	0.467	1.32111e-13
PRC1	9.2988e-18	0.302825	0.325	0.075	1.37204e-13
IGSF3	9.42104e-18	0.458209	0.675	0.272	1.39007e-13
DKC1	9.67067e-18	0.383338	0.444	0.135	1.42691e-13
PIBF1	9.75459e-18	0.267277	0.27	0.052	1.43929e-13
AAAS	1.12175e-17	0.424357	0.524	0.186	1.65515e-13
CDC16	1.14485e-17	0.405722	0.548	0.198	1.68923e-13
PPP1R35	1.16448e-17	0.415429	0.532	0.188	1.71819e-13
NOP2	1.16507e-17	0.373646	0.508	0.17	1.71906e-13
MTUS1	1.17752e-17	0.432803	0.603	0.235	1.73743e-13
NOP58	1.18726e-17	0.476548	0.611	0.244	1.7518e-13
SRD5A1	1.1946e-17	0.377212	0.437	0.132	1.76264e-13
ATP5MC3	1.21187e-17	0.530089	0.722	0.344	1.78811e-13
NEIL1	1.23359e-17	0.363861	0.365	0.097	1.82017e-13
SREK1	1.24286e-17	0.401968	0.587	0.218	1.83384e-13
LSS	1.25501e-17	0.48297	0.651	0.284	1.85177e-13
ECHDC2	1.26446e-17	0.432698	0.651	0.268	1.86571e-13
CREBZF	1.36107e-17	0.472734	0.841	0.413	2.00825e-13
CCDC85B	1.48975e-17	0.429375	0.651	0.265	2.19812e-13
PDCD11	1.51e-17	0.409051	0.484	0.162	2.22801e-13
TNRC6A	1.51054e-17	0.381904	0.571	0.208	2.2288e-13
BRI3BP	1.56291e-17	0.361789	0.46	0.146	2.30607e-13
CDCP1	1.66228e-17	0.386391	0.476	0.154	2.45269e-13
TBC1D9B	1.6691e-17	0.434471	0.683	0.289	2.46275e-13
FAM160B2	1.68482e-17	0.431967	0.643	0.264	2.48595e-13
THAP11	1.69293e-17	0.409685	0.468	0.154	2.49792e-13
TRMT61A	1.69403e-17	0.338065	0.357	0.093	2.49955e-13
THOC7	1.72261e-17	0.45341	0.595	0.236	2.54172e-13
DENND4C	1.72925e-17	0.410844	0.563	0.209	2.55151e-13
SVIL	1.81236e-17	0.556085	0.714	0.347	2.67413e-13
GPI	1.87122e-17	0.524456	0.778	0.39	2.76098e-13
AGAP3	1.87924e-17	0.447856	0.635	0.262	2.77281e-13
HIST1H2BB	1.90479e-17	0.355871	0.325	0.077	2.81052e-13
HSF4	1.91108e-17	0.43701	0.595	0.229	2.8198e-13
MOV10	1.94094e-17	0.44858	0.595	0.233	2.86386e-13
TPX2	1.95494e-17	0.282751	0.278	0.056	2.88451e-13
RAD23A	1.96664e-17	0.464904	0.651	0.274	2.90177e-13
HMGN3	1.99477e-17	0.461703	0.659	0.282	2.94328e-13
TUBGCP6	2.04301e-17	0.439317	0.587	0.23	3.01446e-13
FAM193A	2.04359e-17	0.402394	0.397	0.115	3.01531e-13
SERBP1	2.07876e-17	0.497227	0.968	0.805	3.06722e-13
PCED1A	2.09101e-17	0.400893	0.532	0.187	3.08529e-13
DEAF1	2.13719e-17	0.386448	0.524	0.181	3.15342e-13
TMEM14A	2.17008e-17	0.400029	0.5	0.17	3.20196e-13
SFXN4	2.17288e-17	0.325833	0.357	0.091	3.20609e-13
LGALS9C	2.20628e-17	0.398366	0.429	0.129	3.25537e-13
ADCY3	2.26067e-17	0.364374	0.429	0.128	3.33562e-13
FER	2.30836e-17	0.389715	0.532	0.188	3.40599e-13
NARS	2.31831e-17	0.468167	0.635	0.27	3.42067e-13
DIS3L	2.33135e-17	0.333976	0.357	0.093	3.43991e-13
RPUSD4	2.36414e-17	0.299791	0.325	0.077	3.4883e-13
MRRF	2.46074e-17	0.349002	0.357	0.093	3.63083e-13
HERC2	2.46937e-17	0.373646	0.5	0.168	3.64356e-13
CCDC86	2.53608e-17	0.343714	0.429	0.128	3.74198e-13
NAA50	2.81374e-17	0.486851	0.659	0.29	4.15167e-13
HSP90AA1	2.87103e-17	0.507464	0.944	0.634	4.23621e-13
CRIP2	2.87246e-17	0.493165	0.817	0.418	4.23831e-13
KXD1	2.94914e-17	0.404953	0.595	0.233	4.35145e-13
NXN	3.2499e-17	0.388293	0.5	0.17	4.79523e-13
SLC35C2	3.28872e-17	0.425716	0.548	0.204	4.85251e-13
BRMS1	3.40526e-17	0.400467	0.524	0.186	5.02446e-13
TOMM7	3.4115e-17	0.484356	0.762	0.36	5.03367e-13
KLF13	3.57681e-17	0.46569	0.595	0.24	5.27759e-13
ULK2	3.64377e-17	0.409051	0.452	0.144	5.37639e-13
LARP4	3.65483e-17	0.392701	0.548	0.199	5.3927e-13
SELENON	3.69149e-17	0.389542	0.484	0.16	5.4468e-13
PRPF40A	3.77086e-17	0.451858	0.635	0.266	5.5639e-13
ZFP36L2	3.84642e-17	0.647049	0.944	0.549	5.67539e-13
PRKRIP1	3.8682e-17	0.425202	0.516	0.187	5.70752e-13
RHBDF1	3.87275e-17	0.374756	0.516	0.182	5.71424e-13
KIAA1217	3.88903e-17	0.473659	0.778	0.368	5.73827e-13
MEPCE	3.96021e-17	0.408125	0.508	0.176	5.84329e-13
SRSF4	3.99383e-17	0.424272	0.667	0.282	5.8929e-13
HIST1H4B	4.00566e-17	0.393608	0.5	0.167	5.91035e-13
CHADL	4.20807e-17	0.257683	0.246	0.045	6.20901e-13
NSMCE4A	4.23041e-17	0.395146	0.579	0.219	6.24197e-13
USP22	4.35364e-17	0.494304	0.857	0.469	6.4238e-13
ZRANB2	4.43999e-17	0.481761	0.77	0.38	6.55121e-13
ERGIC3	4.49398e-17	0.523578	0.77	0.384	6.63087e-13
PTPN4	4.62126e-17	0.351598	0.405	0.117	6.81867e-13
NDUFS2	4.65282e-17	0.397989	0.563	0.209	6.86524e-13
MED24	4.83045e-17	0.368767	0.484	0.159	7.12733e-13
VPS13B	4.90088e-17	0.401306	0.556	0.205	7.23125e-13
KIF11	5.03598e-17	0.276266	0.254	0.048	7.43059e-13
TLE2	5.1142e-17	0.372973	0.357	0.094	7.54601e-13
ACSF2	5.21505e-17	0.325196	0.302	0.069	7.69481e-13
SMG1	5.67306e-17	0.593525	0.833	0.482	8.3706e-13
SAFB2	5.72833e-17	0.504253	0.675	0.313	8.45215e-13
NSMAF	5.93821e-17	0.35547	0.421	0.127	8.76183e-13
OAS2	6.07771e-17	0.415971	0.54	0.201	8.96766e-13
UQCC1	6.08501e-17	0.375802	0.563	0.207	8.97843e-13
BCL9L	6.09451e-17	0.468505	0.786	0.385	8.99245e-13
JADE1	6.5215e-17	0.324348	0.349	0.09	9.62247e-13
SMIM29	6.62267e-17	0.309467	0.365	0.097	9.77175e-13
NSMF	6.73801e-17	0.414358	0.643	0.262	9.94193e-13
MYL6B	6.86244e-17	0.312362	0.365	0.096	1.01255e-12
PDCD4	6.97971e-17	0.562636	0.802	0.407	1.02986e-12
UBQLN4	7.04208e-17	0.396068	0.508	0.181	1.03906e-12
SRSF3	7.09837e-17	0.503496	0.929	0.582	1.04736e-12
MFHAS1	7.15882e-17	0.421651	0.468	0.161	1.05628e-12
RABGAP1	7.15939e-17	0.385602	0.5	0.174	1.05637e-12
UBXN11	7.17146e-17	0.309738	0.317	0.076	1.05815e-12
IL17RE	7.32482e-17	0.378678	0.429	0.134	1.08078e-12
ZNF219	7.35353e-17	0.474788	0.651	0.284	1.08501e-12
ITPA	7.40559e-17	0.431715	0.532	0.198	1.0927e-12
SFSWAP	7.47088e-17	0.431671	0.571	0.222	1.10233e-12
FARSB	7.51101e-17	0.383149	0.444	0.141	1.10825e-12
PCIF1	7.70413e-17	0.380515	0.389	0.113	1.13674e-12
SSRP1	7.70425e-17	0.382416	0.484	0.163	1.13676e-12
TUFM	7.70713e-17	0.478476	0.778	0.379	1.13719e-12
OXA1L	7.77564e-17	0.395585	0.532	0.192	1.1473e-12
PRCC	7.87865e-17	0.386926	0.579	0.217	1.1625e-12
GPT2	7.91046e-17	0.342347	0.397	0.113	1.16719e-12
LETM1	7.93843e-17	0.42351	0.579	0.222	1.17132e-12
CIZ1	8.14705e-17	0.401	0.516	0.187	1.2021e-12
ACIN1	8.33665e-17	0.454704	0.778	0.374	1.23007e-12
ANKRD16	8.34694e-17	0.318919	0.365	0.099	1.23159e-12
CAPNS2	8.47687e-17	0.468896	0.778	0.351	1.25076e-12
GOLGB1	8.53417e-17	0.464396	0.722	0.333	1.25922e-12
BUB3	8.84366e-17	0.414438	0.556	0.212	1.30488e-12
ZWINT	8.91747e-17	0.366687	0.333	0.085	1.31577e-12
RFX2	9.0903e-17	0.281129	0.317	0.075	1.34127e-12
ELAC2	9.13987e-17	0.347651	0.492	0.163	1.34859e-12
NOM1	9.17369e-17	0.350171	0.468	0.15	1.35358e-12
XBP1	9.25575e-17	-1.14884	0.365	0.674	1.36569e-12
EML2	9.28859e-17	0.432505	0.532	0.198	1.37053e-12
SCN4B	9.31384e-17	0.269177	0.27	0.055	1.37426e-12
ANKRD13B	9.31384e-17	0.269177	0.27	0.055	1.37426e-12
CBFB	9.45568e-17	0.36861	0.587	0.22	1.39519e-12
C19orf33	9.71374e-17	0.559989	0.929	0.644	1.43326e-12
MICAL3	9.86354e-17	0.374474	0.452	0.147	1.45536e-12
ZNF512B	1.01536e-16	0.444327	0.556	0.218	1.49816e-12
STUB1	1.02787e-16	0.452348	0.714	0.333	1.51662e-12
KATNB1	1.03335e-16	0.297319	0.325	0.079	1.52471e-12
HPS6	1.04282e-16	0.285006	0.341	0.085	1.53868e-12
BAZ1B	1.04896e-16	0.408762	0.595	0.236	1.54774e-12
CCT8	1.07666e-16	0.437951	0.635	0.272	1.58861e-12
PRRC2A	1.0898e-16	0.47069	0.738	0.342	1.608e-12
UBE4B	1.10689e-16	0.433042	0.651	0.283	1.63321e-12
CSAD	1.20391e-16	0.47207	0.619	0.262	1.77637e-12
CDK16	1.20746e-16	0.405366	0.508	0.18	1.78161e-12
SLC35E2B	1.23443e-16	0.380153	0.532	0.193	1.82141e-12
TKFC	1.23552e-16	0.335476	0.365	0.1	1.82302e-12
ARL2	1.23941e-16	0.437528	0.571	0.229	1.82876e-12
NPHP4	1.26935e-16	0.29395	0.31	0.073	1.87293e-12
ZDHHC8	1.31052e-16	0.455722	0.579	0.235	1.93367e-12
TMEM63C	1.34229e-16	0.275284	0.278	0.059	1.98056e-12
SDR39U1	1.35894e-16	0.403032	0.54	0.205	2.00511e-12
SH3PXD2A	1.39127e-16	0.500767	0.786	0.392	2.05281e-12
NR2C1	1.42325e-16	0.338482	0.421	0.128	2.10001e-12
SENP3	1.43988e-16	0.365863	0.421	0.131	2.12455e-12
GSTK1	1.46675e-16	0.473182	0.81	0.402	2.16419e-12
NDUFS1	1.47974e-16	0.386125	0.571	0.217	2.18335e-12
TMEM238	1.48631e-16	0.42626	0.587	0.235	2.19305e-12
TGFBR3	1.52029e-16	0.354272	0.381	0.107	2.2432e-12
PHPT1	1.52407e-16	0.483908	0.722	0.336	2.24876e-12
LSR	1.54909e-16	0.472655	0.675	0.301	2.28569e-12
COQ8B	1.57052e-16	0.31052	0.405	0.116	2.3173e-12
PARN	1.59123e-16	0.333031	0.397	0.115	2.34785e-12
ALYREF	1.60175e-16	0.437951	0.619	0.263	2.36338e-12
EIF2B5	1.62644e-16	0.424312	0.595	0.241	2.39981e-12
MYO5A	1.64195e-16	0.395347	0.516	0.184	2.42269e-12
PRKAB2	1.65393e-16	0.282513	0.31	0.073	2.44037e-12
SPINT2	1.68382e-16	0.528655	0.952	0.73	2.48448e-12
NUBP2	1.71346e-16	0.434902	0.532	0.203	2.52822e-12
THRAP3	1.74901e-16	0.430113	0.659	0.275	2.58067e-12
SOGA1	1.75081e-16	0.416598	0.627	0.255	2.58332e-12
ZFP36L1	1.7573e-16	0.469879	0.992	0.949	2.59289e-12
ATIC	1.80543e-16	0.361421	0.468	0.155	2.66392e-12
PMS2	1.83571e-16	0.358377	0.365	0.102	2.70858e-12
ABCF3	1.8467e-16	0.472042	0.595	0.254	2.72481e-12
CUL9	1.92979e-16	0.381371	0.532	0.193	2.8474e-12
ZC3H18	1.95642e-16	0.430477	0.643	0.265	2.88669e-12
TOP2A	2.02604e-16	0.326711	0.31	0.075	2.98943e-12
GNA11	2.07489e-16	0.441499	0.548	0.212	3.0615e-12
HNRNPAB	2.09461e-16	0.553309	0.865	0.494	3.09059e-12
TCEA3	2.16299e-16	0.429727	0.571	0.223	3.19149e-12
IKBKB	2.18803e-16	0.457773	0.706	0.328	3.22844e-12
CORO1C	2.24441e-16	0.428997	0.627	0.264	3.31163e-12
WSCD2	2.2588e-16	0.253088	0.198	0.03	3.33285e-12
RTN4	2.31306e-16	0.500745	0.96	0.796	3.41292e-12
BLMH	2.38451e-16	0.336246	0.468	0.154	3.51834e-12
CXADR	2.49555e-16	0.351642	0.389	0.114	3.68218e-12
EFS	2.5757e-16	0.438037	0.683	0.305	3.80044e-12
LIMK2	2.66356e-16	0.432472	0.563	0.222	3.93008e-12
NKTR	2.6889e-16	0.452145	0.611	0.255	3.96747e-12
SAPCD1	2.78149e-16	0.284162	0.27	0.057	4.10409e-12
OAT	2.7877e-16	0.436427	0.603	0.251	4.11325e-12
TOP2B	2.84052e-16	0.411985	0.556	0.213	4.19119e-12
ING5	2.84803e-16	0.359146	0.437	0.139	4.20226e-12
UTP6	2.85265e-16	0.385681	0.524	0.189	4.20908e-12
CCNI	2.94829e-16	0.456601	0.833	0.414	4.3502e-12
FANCG	3.04471e-16	0.295028	0.294	0.068	4.49247e-12
JAG1	3.04896e-16	0.480016	0.841	0.448	4.49873e-12
METTL17	3.15231e-16	0.38116	0.476	0.163	4.65123e-12
LUC7L2	3.1908e-16	0.441253	0.746	0.344	4.70803e-12
CACNA2D3	3.23537e-16	0.427044	0.571	0.221	4.77379e-12
ERCC5	3.24994e-16	0.38259	0.516	0.187	4.79529e-12
TMEM259	3.30973e-16	0.490008	0.944	0.619	4.88351e-12
SRRM2	3.3608e-16	0.47808	0.976	0.849	4.95886e-12
MXD3	3.41672e-16	0.407152	0.444	0.148	5.04138e-12
IGFBP4	3.4478e-16	-1.263	0.421	0.658	5.08722e-12
DNAJA3	3.53612e-16	0.358086	0.405	0.124	5.21755e-12
NOC3L	3.55959e-16	0.30534	0.302	0.072	5.25218e-12
TRIR	3.61044e-16	0.486097	0.825	0.463	5.32721e-12
TCP1	3.61328e-16	0.496514	0.714	0.359	5.3314e-12
AMMECR1L	3.62432e-16	0.304457	0.325	0.082	5.34768e-12
COPS7B	3.7316e-16	0.368551	0.484	0.164	5.50597e-12
CENPP	3.80499e-16	0.395843	0.54	0.203	5.61426e-12
SF3B3	3.97674e-16	0.376746	0.452	0.153	5.86767e-12
ROR1	4.03202e-16	0.264338	0.214	0.036	5.94925e-12
GGNBP2	4.03698e-16	0.442899	0.651	0.287	5.95656e-12
ZC3H4	4.03888e-16	0.394445	0.683	0.292	5.95937e-12
ECI1	4.06214e-16	0.348923	0.452	0.148	5.99369e-12
BRD8	4.2506e-16	0.325605	0.437	0.136	6.27176e-12
IFI16	4.26889e-16	0.458788	0.778	0.373	6.29875e-12
POLR2B	4.28928e-16	0.369363	0.603	0.24	6.32883e-12
SMAD2	4.37588e-16	0.412356	0.532	0.205	6.45661e-12
FOXE1	4.43998e-16	0.457299	0.778	0.379	6.55118e-12
ZBTB48	4.49042e-16	0.30925	0.357	0.098	6.62561e-12
ZNF462	4.56655e-16	0.415514	0.556	0.221	6.73794e-12
TRIM4	4.61348e-16	0.394552	0.476	0.168	6.80719e-12
RBM17	4.66186e-16	0.421452	0.73	0.331	6.87857e-12
PITPNA	4.7015e-16	0.513965	0.921	0.649	6.93706e-12
WLS	4.77676e-16	0.392045	0.611	0.247	7.04811e-12
AVEN	4.85113e-16	0.439317	0.563	0.226	7.15784e-12
POLR3H	4.87805e-16	0.342571	0.46	0.152	7.19757e-12
TCEA2	5.01367e-16	0.359332	0.413	0.128	7.39768e-12
FAM204A	5.02526e-16	0.383305	0.484	0.169	7.41477e-12
LARP1	5.06202e-16	0.450551	0.603	0.254	7.46901e-12
TMEM201	5.18401e-16	0.277121	0.278	0.061	7.64901e-12
USP34	5.18967e-16	0.412961	0.698	0.307	7.65736e-12
PPHLN1	5.22941e-16	0.374763	0.405	0.126	7.71599e-12
SMARCC1	5.37177e-16	0.418204	0.595	0.247	7.92605e-12
RHOB	5.38822e-16	0.566964	0.929	0.593	7.95032e-12
DVL3	5.46957e-16	0.470612	0.706	0.334	8.07035e-12
CD82	5.49573e-16	0.474132	0.77	0.38	8.10894e-12
MAD1L1	5.55523e-16	0.330389	0.397	0.119	8.19674e-12
SS18L1	5.77824e-16	0.361209	0.5	0.179	8.5258e-12
GPNMB	5.78385e-16	0.473632	0.794	0.405	8.53407e-12
PARK7	6.01713e-16	0.474603	0.77	0.376	8.87828e-12
PSIP1	6.17186e-16	0.382244	0.524	0.192	9.10658e-12
PCNT	6.48647e-16	0.400285	0.571	0.229	9.57079e-12
NAP1L4	6.63336e-16	0.464464	0.77	0.381	9.78752e-12
IDH3B	6.64428e-16	0.388701	0.508	0.186	9.80364e-12
CXCL12	6.73201e-16	-1.29179	0.254	0.577	9.93308e-12
PM20D2	6.73336e-16	0.321631	0.349	0.096	9.93507e-12
EEF1AKMT2	6.8327e-16	0.360567	0.421	0.134	1.00817e-11
ZNF266	6.96211e-16	0.377276	0.54	0.203	1.02726e-11
SNRPD1	7.03219e-16	0.379991	0.524	0.195	1.0376e-11
LIMD1	7.04646e-16	0.308999	0.397	0.116	1.0397e-11
SEH1L	7.05379e-16	0.326434	0.405	0.124	1.04079e-11
MAML1	7.10476e-16	0.439414	0.659	0.299	1.04831e-11
COX5B	7.14515e-16	0.490276	0.802	0.427	1.05427e-11
MSH2	7.30774e-16	0.354308	0.365	0.104	1.07826e-11
COX4I1	7.47746e-16	0.507759	0.849	0.554	1.1033e-11
MLF2	7.50755e-16	0.504052	0.77	0.414	1.10774e-11
WNK1	7.53506e-16	0.506833	0.952	0.749	1.1118e-11
CD9	7.58304e-16	0.47272	0.984	0.853	1.11888e-11
ZNF785	7.60907e-16	0.33413	0.357	0.1	1.12272e-11
ZMYM2	7.74207e-16	0.46413	0.722	0.36	1.14234e-11
SETD2	8.04352e-16	0.366919	0.524	0.19	1.18682e-11
CALML4	8.38781e-16	0.280337	0.286	0.065	1.23762e-11
PID1	8.43243e-16	0.330389	0.397	0.121	1.24421e-11
VIM	8.46019e-16	-1.27345	0.667	0.753	1.2483e-11
PRR7	8.54512e-16	0.300625	0.286	0.067	1.26083e-11
SNF8	8.6159e-16	0.37115	0.476	0.166	1.27128e-11
L3HYPDH	8.80991e-16	0.277807	0.333	0.086	1.2999e-11
GTF3C4	8.90424e-16	0.342404	0.405	0.125	1.31382e-11
PPP2R5A	8.94096e-16	0.40145	0.571	0.234	1.31924e-11
FLOT2	8.98052e-16	0.425928	0.69	0.312	1.32508e-11
ACTB	9.0323e-16	-0.519849	1	0.997	1.33272e-11
QDPR	9.07961e-16	0.310604	0.349	0.096	1.3397e-11
EIF3A	9.09427e-16	0.462293	0.937	0.64	1.34186e-11
ABCA5	9.19381e-16	0.407492	0.484	0.178	1.35655e-11
HSPE1	9.27248e-16	0.439074	0.595	0.249	1.36815e-11
R3HCC1	9.29834e-16	0.297688	0.381	0.109	1.37197e-11
ELMSAN1	9.72817e-16	0.39506	0.683	0.295	1.43539e-11
GABBR1	9.74522e-16	0.393747	0.563	0.222	1.43791e-11
NCLN	9.84653e-16	0.364024	0.46	0.157	1.45286e-11
IGF1R	1.04178e-15	0.426207	0.556	0.22	1.53715e-11
SNCA	1.07293e-15	0.355643	0.341	0.093	1.58311e-11
PYURF	1.07354e-15	0.365913	0.603	0.238	1.58401e-11
SCEL	1.07891e-15	-1.09675	0.206	0.552	1.59193e-11
CEP192	1.11813e-15	0.331883	0.413	0.129	1.6498e-11
KDM1A	1.13355e-15	0.41356	0.524	0.206	1.67256e-11
TPR	1.14098e-15	0.392145	0.643	0.271	1.68352e-11
ZNF384	1.14255e-15	0.395285	0.452	0.159	1.68583e-11
DGKA	1.16012e-15	0.495946	0.849	0.478	1.71175e-11
NDUFA11	1.16724e-15	0.460173	0.77	0.404	1.72226e-11
U2AF2	1.17638e-15	0.442765	0.714	0.341	1.73575e-11
SON	1.18186e-15	0.48102	0.825	0.448	1.74384e-11
DDX55	1.19006e-15	0.403192	0.484	0.174	1.75593e-11
CRIP1	1.19193e-15	0.488479	0.857	0.465	1.75869e-11
RBM14	1.20475e-15	0.386312	0.532	0.201	1.77761e-11
LPP	1.20767e-15	0.27475	0.286	0.065	1.78191e-11
WDR33	1.2699e-15	0.403519	0.587	0.241	1.87374e-11
C11orf80	1.29119e-15	0.381687	0.444	0.151	1.90515e-11
RBM28	1.30617e-15	0.317565	0.349	0.097	1.92725e-11
SF1	1.3088e-15	0.526709	0.786	0.433	1.93113e-11
TM7SF3	1.31e-15	0.38889	0.524	0.2	1.93291e-11
MFSD10	1.40574e-15	0.386061	0.508	0.189	2.07417e-11
THOP1	1.4264e-15	0.321032	0.397	0.122	2.10465e-11
ERCC3	1.45104e-15	0.337401	0.437	0.141	2.14101e-11
SNX17	1.53081e-15	0.379997	0.611	0.247	2.2587e-11
PEX14	1.53453e-15	0.277541	0.286	0.067	2.2642e-11
AMY2B	1.5407e-15	0.345122	0.444	0.147	2.2733e-11
CCT5	1.55357e-15	0.486777	0.659	0.313	2.2923e-11
TSPAN3	1.62507e-15	0.412041	0.532	0.206	2.39778e-11
POLR1D	1.64606e-15	0.46798	0.849	0.448	2.42876e-11
BCR	1.68017e-15	0.420997	0.651	0.29	2.4791e-11
SMYD4	1.69928e-15	0.278365	0.317	0.081	2.50729e-11
RBM26	1.70095e-15	0.424231	0.556	0.222	2.50975e-11
PER1	1.74658e-15	0.378474	0.54	0.209	2.57707e-11
TRIAP1	1.75658e-15	0.283271	0.325	0.084	2.59183e-11
GAN	1.78564e-15	0.363365	0.524	0.195	2.63471e-11
PCM1	1.7948e-15	0.363034	0.635	0.263	2.64823e-11
MICA	1.80621e-15	0.340037	0.444	0.146	2.66506e-11
SLC16A1	1.83518e-15	0.283271	0.31	0.077	2.70781e-11
RPUSD1	1.85505e-15	0.300345	0.325	0.085	2.73712e-11
ATP5IF1	1.87913e-15	0.484932	0.857	0.48	2.77266e-11
XRCC6	1.89681e-15	0.470062	0.667	0.318	2.79875e-11
NOC4L	1.91177e-15	0.315229	0.373	0.109	2.82081e-11
PPIL3	1.93614e-15	0.305195	0.349	0.097	2.85678e-11
RSF1	1.94866e-15	0.317903	0.365	0.105	2.87524e-11
HNRNPUL1	2.01039e-15	0.475987	0.968	0.769	2.96634e-11
ACBD6	2.01672e-15	0.39832	0.452	0.157	2.97567e-11
MCMBP	2.03667e-15	0.343899	0.476	0.166	3.0051e-11
PPP1R3E	2.08508e-15	0.323267	0.357	0.102	3.07653e-11
NME1	2.11325e-15	0.375154	0.524	0.198	3.1181e-11
UBE3C	2.15618e-15	0.401195	0.571	0.239	3.18144e-11
AKT2	2.18152e-15	0.436828	0.603	0.259	3.21883e-11
TNFRSF21	2.18288e-15	0.500056	0.643	0.299	3.22084e-11
SLC25A3	2.19063e-15	0.42797	0.817	0.409	3.23227e-11
BIVM	2.30664e-15	0.31639	0.357	0.102	3.40344e-11
AMT	2.33133e-15	0.345067	0.421	0.135	3.43988e-11
TRIM21	2.35743e-15	0.309896	0.373	0.109	3.47838e-11
NPRL2	2.36017e-15	0.263642	0.294	0.07	3.48243e-11
HADH	2.37731e-15	0.358318	0.365	0.109	3.50773e-11
TEF	2.41837e-15	0.327302	0.349	0.098	3.5683e-11
FBXL8	2.43632e-15	0.327641	0.381	0.114	3.59479e-11
P2RY1	2.4543e-15	0.415788	0.587	0.242	3.62132e-11
IRF9	2.59211e-15	0.492181	0.738	0.363	3.82465e-11
ADORA2B	2.64454e-15	0.258567	0.214	0.038	3.90202e-11
SLC38A2	2.66334e-15	0.523777	0.754	0.406	3.92975e-11
AP1G2	2.68445e-15	0.472637	0.627	0.29	3.9609e-11
WDR18	2.79017e-15	0.378024	0.429	0.142	4.11689e-11
CNOT10	2.80277e-15	0.345011	0.397	0.126	4.13549e-11
BOD1	2.8344e-15	0.362917	0.437	0.149	4.18215e-11
DPP9	2.87243e-15	0.35226	0.571	0.221	4.23827e-11
RANBP2	2.88616e-15	0.403958	0.54	0.214	4.25854e-11
COX7C	2.99692e-15	0.453004	0.786	0.402	4.42196e-11
NFE2L1	3.00998e-15	0.433419	0.722	0.353	4.44123e-11
DGCR8	3.05063e-15	0.400195	0.643	0.275	4.50121e-11
SIGMAR1	3.08832e-15	0.368658	0.484	0.178	4.55682e-11
SNAPC1	3.14308e-15	0.338226	0.365	0.108	4.63762e-11
SF3A1	3.14343e-15	0.346467	0.548	0.208	4.63813e-11
DIAPH2	3.15872e-15	0.386502	0.54	0.214	4.6607e-11
OR2A7	3.16427e-15	0.326317	0.373	0.11	4.66887e-11
TRIM66	3.1944e-15	0.355145	0.46	0.16	4.71334e-11
ZNF641	3.24366e-15	0.337898	0.294	0.074	4.78602e-11
NMU	3.24925e-15	0.435937	0.54	0.213	4.79427e-11
FRAT2	3.25234e-15	0.399181	0.389	0.125	4.79883e-11
PHRF1	3.25933e-15	0.438122	0.698	0.333	4.80914e-11
DTNB	3.30106e-15	0.282127	0.294	0.072	4.87072e-11
TRAF3IP1	3.33003e-15	0.35031	0.365	0.108	4.91346e-11
SYNGR1	3.44393e-15	0.362679	0.468	0.168	5.08152e-11
PDCD5	3.47826e-15	0.428631	0.595	0.256	5.13217e-11
RIC3	3.48731e-15	0.297898	0.333	0.089	5.14553e-11
UNC45A	3.51021e-15	0.394367	0.508	0.195	5.17931e-11
TRPM4	3.55643e-15	0.446511	0.595	0.262	5.24751e-11
AATF	3.56239e-15	0.36377	0.484	0.175	5.2563e-11
FAM174C	3.63786e-15	0.383993	0.508	0.191	5.36766e-11
LY6D	3.64185e-15	0.529532	0.984	0.884	5.37355e-11
CX3CL1	3.77852e-15	0.376	0.452	0.157	5.57521e-11
DNM1L	3.80466e-15	0.303257	0.381	0.114	5.61377e-11
CARS2	3.84343e-15	0.32607	0.46	0.157	5.67098e-11
PNKP	3.87887e-15	0.337769	0.5	0.183	5.72327e-11
ACYP2	3.88629e-15	0.344996	0.381	0.117	5.73422e-11
HIST2H2AB	3.89335e-15	0.362758	0.437	0.146	5.74463e-11
PELI3	3.90866e-15	0.292238	0.286	0.069	5.76722e-11
COL1A2	3.96142e-15	-1.99005	0.984	0.982	5.84507e-11
DNMT1	4.00006e-15	0.341304	0.452	0.155	5.90209e-11
PRPF39	4.06371e-15	0.401724	0.611	0.26	5.996e-11
PUM3	4.08861e-15	0.404234	0.429	0.147	6.03275e-11
PDS5A	4.15403e-15	0.390464	0.643	0.277	6.12927e-11
RCOR3	4.17862e-15	0.386502	0.54	0.214	6.16556e-11
CENPF	4.18204e-15	0.261603	0.246	0.051	6.1706e-11
HDAC11	4.22797e-15	0.275082	0.325	0.085	6.23837e-11
NCDN	4.2671e-15	0.442941	0.452	0.167	6.2961e-11
NIT2	4.30045e-15	0.373689	0.54	0.209	6.34531e-11
CLCC1	4.32141e-15	0.33295	0.373	0.112	6.37624e-11
EFHD2	4.34181e-15	0.433081	0.603	0.258	6.40634e-11
DCTPP1	4.35577e-15	0.281903	0.325	0.086	6.42694e-11
COL1A1	4.35761e-15	-2.01315	0.96	0.916	6.42965e-11
NEK9	4.37254e-15	0.430906	0.524	0.202	6.45168e-11
SLC25A30	4.41603e-15	0.256503	0.278	0.064	6.51585e-11
DIS3L2	4.42003e-15	0.378812	0.46	0.164	6.52175e-11
ZFP91	4.55434e-15	0.394248	0.571	0.237	6.71992e-11
MTERF2	4.60106e-15	0.307205	0.31	0.08	6.78887e-11
RPAP1	4.62647e-15	0.270574	0.294	0.072	6.82636e-11
ECH1	4.78376e-15	0.36298	0.548	0.217	7.05844e-11
NUPR1	4.80002e-15	0.436696	0.913	0.486	7.08243e-11
C11orf49	4.89698e-15	0.295028	0.278	0.065	7.2255e-11
TBCK	4.95908e-15	0.330098	0.349	0.1	7.31712e-11
PPP4R2	4.9597e-15	0.431811	0.69	0.324	7.31803e-11
PTGDS	5.05109e-15	-1.25786	0.333	0.625	7.45288e-11
NCOR2	5.1587e-15	0.405486	0.706	0.326	7.61166e-11
CYB5D2	5.2713e-15	0.285006	0.325	0.086	7.7778e-11
PELP1	5.34358e-15	0.342624	0.468	0.165	7.88446e-11
HMG20B	5.56132e-15	0.449932	0.738	0.372	8.20573e-11
PTOV1	5.6794e-15	0.40797	0.651	0.291	8.37996e-11
KRTCAP3	5.68917e-15	0.262122	0.262	0.058	8.39438e-11
FSCN1	5.76286e-15	0.457023	0.563	0.235	8.5031e-11
LRRC37A2	5.87989e-15	0.351244	0.524	0.199	8.67578e-11
BANF1	6.00889e-15	0.434931	0.675	0.313	8.86611e-11
CYB5B	6.08328e-15	0.354993	0.5	0.186	8.97589e-11
POGLUT1	6.1138e-15	0.338581	0.421	0.139	9.02091e-11
TOMM40	6.36471e-15	0.375915	0.405	0.134	9.39113e-11
BRD9	6.44533e-15	0.367516	0.468	0.168	9.51008e-11
TCEAL4	6.52412e-15	0.420551	0.619	0.273	9.62633e-11
SF3B5	6.54725e-15	0.396997	0.635	0.279	9.66047e-11
FZD6	6.55065e-15	0.335496	0.5	0.18	9.66549e-11
EMG1	6.58355e-15	0.310724	0.413	0.133	9.71403e-11
MCRS1	6.59826e-15	0.357704	0.452	0.158	9.73574e-11
BCL2L13	6.67068e-15	0.376563	0.563	0.226	9.84258e-11
TRA2B	6.68648e-15	0.478508	0.794	0.429	9.8659e-11
USP47	7.23686e-15	0.366171	0.476	0.175	1.0678e-10
SPRY2	7.34127e-15	0.303342	0.325	0.088	1.0832e-10
ARFIP2	7.44137e-15	0.374346	0.492	0.185	1.09797e-10
CELF1	7.83238e-15	0.420997	0.619	0.269	1.15567e-10
COMMD4	7.87225e-15	0.354993	0.5	0.188	1.16155e-10
ATG16L2	7.91899e-15	0.366448	0.548	0.217	1.16845e-10
GANC	8.03599e-15	0.289098	0.325	0.088	1.18571e-10
GMNN	8.13496e-15	0.260715	0.27	0.062	1.20031e-10
FLNA	8.48714e-15	0.501046	0.984	0.722	1.25228e-10
NRG1	8.50046e-15	0.29395	0.294	0.074	1.25424e-10
KLK13	8.94749e-15	-1.27002	0.349	0.659	1.3202e-10
PCNA	9.14721e-15	0.376	0.46	0.165	1.34967e-10
KLK10	9.40738e-15	-1.37974	0.452	0.707	1.38806e-10
DCAF1	9.46947e-15	0.304582	0.381	0.117	1.39722e-10
RANBP3	9.52098e-15	0.373381	0.476	0.176	1.40482e-10
CRK	9.55501e-15	0.414961	0.643	0.294	1.40984e-10
ABCC10	9.62605e-15	0.298182	0.349	0.101	1.42032e-10
ACOT11	9.70704e-15	0.272412	0.294	0.073	1.43227e-10
RBBP8	9.88225e-15	0.283898	0.302	0.078	1.45813e-10
HES6	9.9526e-15	0.307387	0.151	0.019	1.46851e-10
CCDC102A	1.01683e-14	0.30224	0.333	0.093	1.50033e-10
TRAF4	1.02068e-14	0.301979	0.333	0.094	1.50601e-10
KRT78	1.07294e-14	-1.73241	0.19	0.532	1.58312e-10
PPP2R2D	1.07855e-14	0.306778	0.357	0.106	1.5914e-10
ATP5F1D	1.08262e-14	0.492279	0.825	0.453	1.59741e-10
OPLAH	1.0885e-14	0.283898	0.294	0.074	1.60608e-10
HCFC1R1	1.10386e-14	0.403901	0.627	0.277	1.62874e-10
SGMS1	1.1119e-14	0.364412	0.508	0.192	1.64061e-10
CDH3	1.1242e-14	0.296143	0.429	0.139	1.65875e-10
HCFC1	1.18127e-14	0.342921	0.54	0.208	1.74296e-10
JPT2	1.23795e-14	0.355184	0.452	0.16	1.82659e-10
POU3F1	1.24264e-14	0.386391	0.437	0.155	1.83351e-10
PLEKHJ1	1.2599e-14	0.337614	0.46	0.162	1.85898e-10
NUP205	1.30233e-14	0.32448	0.341	0.099	1.92159e-10
HMBS	1.33944e-14	0.268717	0.286	0.071	1.97634e-10
ITGA2	1.35121e-14	0.292818	0.437	0.143	1.99371e-10
NCS1	1.36247e-14	0.332867	0.373	0.117	2.01033e-10
PRLR	1.36277e-14	0.256503	0.262	0.059	2.01077e-10
PSMG4	1.37696e-14	0.282284	0.325	0.088	2.0317e-10
FBXO7	1.38019e-14	0.345224	0.508	0.19	2.03647e-10
CAPN7	1.38039e-14	0.377872	0.5	0.191	2.03676e-10
LTBP4	1.3832e-14	0.421576	0.905	0.485	2.04091e-10
HOOK2	1.44768e-14	0.377131	0.532	0.212	2.13605e-10
RAI1	1.45491e-14	0.336365	0.452	0.156	2.14673e-10
TMSB4X	1.48669e-14	-0.70839	0.984	0.966	2.1936e-10
CBFA2T2	1.50698e-14	0.357864	0.429	0.15	2.22355e-10
BOD1L1	1.52685e-14	0.360429	0.421	0.143	2.25287e-10
ITPRIPL2	1.55849e-14	0.350132	0.468	0.168	2.29955e-10
GTPBP3	1.56148e-14	0.371898	0.413	0.141	2.30396e-10
RXRA	1.56298e-14	0.465174	0.786	0.454	2.30617e-10
INTS1	1.5706e-14	0.356308	0.476	0.174	2.31742e-10
NME3	1.58249e-14	0.438732	0.611	0.273	2.33496e-10
AGGF1	1.6633e-14	0.346424	0.5	0.189	2.4542e-10
JCHAIN	1.66778e-14	-1.71522	0.119	0.455	2.46081e-10
NSUN2	1.68827e-14	0.341435	0.468	0.167	2.49104e-10
TBC1D17	1.74816e-14	0.343994	0.508	0.193	2.57941e-10
ICE2	1.76723e-14	0.299807	0.349	0.102	2.60755e-10
TMEM120B	1.77964e-14	0.263642	0.294	0.074	2.62586e-10
URGCP	1.80436e-14	0.332221	0.429	0.146	2.66234e-10
LRRC59	1.82276e-14	0.343798	0.429	0.148	2.68949e-10
MAN2C1	1.82422e-14	0.378583	0.619	0.269	2.69164e-10
DNPEP	1.84546e-14	0.373817	0.508	0.198	2.72298e-10
SENP6	1.85941e-14	0.371537	0.516	0.201	2.74356e-10
TNFRSF10B	1.86407e-14	0.321178	0.381	0.119	2.75043e-10
AGO3	1.89431e-14	0.27423	0.31	0.082	2.79505e-10
DOCK1	1.90634e-14	0.413793	0.524	0.213	2.81281e-10
ATF7IP	1.91175e-14	0.36087	0.508	0.192	2.82079e-10
INO80B	1.91252e-14	0.462421	0.675	0.336	2.82193e-10
ZNF414	2.04739e-14	0.287733	0.325	0.09	3.02092e-10
DAXX	2.05331e-14	0.357349	0.508	0.196	3.02965e-10
ANO1	2.12606e-14	0.366461	0.429	0.149	3.13701e-10
VEZF1	2.15882e-14	0.323538	0.365	0.112	3.18533e-10
ARHGEF28	2.18855e-14	0.383764	0.532	0.212	3.22921e-10
TBCE.1	2.19534e-14	0.267321	0.278	0.068	3.23922e-10
DDRGK1	2.21487e-14	0.4167	0.841	0.438	3.26803e-10
ZNF787	2.25e-14	0.375802	0.532	0.213	3.31988e-10
DDT	2.35947e-14	0.380153	0.492	0.191	3.4814e-10
SHFL	2.43195e-14	0.366634	0.516	0.201	3.58835e-10
RNF44	2.46359e-14	0.425174	0.571	0.258	3.63502e-10
IGHG3	2.50714e-14	-1.90968	0.175	0.495	3.69928e-10
LSM12	2.58754e-14	0.367213	0.484	0.185	3.81792e-10
DPH2	2.61643e-14	0.314673	0.325	0.091	3.86054e-10
ID2	2.63294e-14	0.479201	0.698	0.352	3.8849e-10
PPA2	2.65734e-14	0.322819	0.492	0.183	3.92091e-10
LRRC75B	2.73711e-14	0.299288	0.381	0.12	4.03861e-10
EIF3L	2.7654e-14	0.327437	0.468	0.17	4.08035e-10
RNF31	2.77928e-14	0.388701	0.492	0.193	4.10082e-10
EPN2	2.79528e-14	0.399394	0.714	0.341	4.12444e-10
OGA	2.81224e-14	0.427534	0.762	0.384	4.14946e-10
PPIG	2.90175e-14	0.337562	0.444	0.157	4.28154e-10
GCN1	2.91743e-14	0.347651	0.548	0.218	4.30467e-10
AP2M1	2.92919e-14	0.423285	0.889	0.489	4.32202e-10
GLI3	2.93065e-14	0.38927	0.54	0.22	4.32417e-10
BRIX1	3.0677e-14	0.311022	0.349	0.104	4.5264e-10
ADAR	3.10849e-14	0.425299	0.754	0.375	4.58657e-10
SDR42E1	3.12702e-14	0.277663	0.349	0.102	4.61392e-10
ARHGAP35	3.13662e-14	0.345284	0.548	0.22	4.62808e-10
BCL7C	3.2151e-14	0.42176	0.611	0.272	4.74388e-10
CHD9	3.27792e-14	0.351262	0.516	0.203	4.83658e-10
AKT1	3.30549e-14	0.356049	0.508	0.196	4.87725e-10
THSD4	3.43805e-14	0.348878	0.46	0.165	5.07284e-10
GTF2F2	3.47495e-14	0.340117	0.452	0.163	5.12729e-10
RING1	3.52755e-14	0.401265	0.643	0.292	5.2049e-10
ANKHD1	3.55544e-14	0.402305	0.794	0.413	5.24605e-10
XPNPEP3	3.59467e-14	0.265026	0.294	0.076	5.30394e-10
CTDSP1	3.59495e-14	0.43257	0.643	0.3	5.30435e-10
ADRB2	3.75117e-14	0.463694	0.619	0.282	5.53485e-10
EXOC3	3.81349e-14	0.4308	0.683	0.322	5.62681e-10
EZH2	3.8348e-14	0.330577	0.397	0.131	5.65825e-10
PRKAR1B	3.8601e-14	0.264136	0.302	0.079	5.69557e-10
OLFM2	3.89119e-14	0.389542	0.437	0.156	5.74146e-10
CNTRL	3.91208e-14	0.306141	0.373	0.116	5.77227e-10
IFITM3	3.97552e-14	0.482011	0.968	0.761	5.86588e-10
FAM20A	3.98773e-14	0.349987	0.5	0.192	5.8839e-10
RBM15B	4.04765e-14	0.415715	0.548	0.236	5.9723e-10
MMS19	4.05131e-14	0.335116	0.468	0.173	5.9777e-10
PES1	4.07019e-14	0.421435	0.619	0.278	6.00556e-10
HIST1H4F	4.14228e-14	0.337062	0.365	0.114	6.11193e-10
ALDH3A2	4.14642e-14	0.524371	0.897	0.64	6.11805e-10
CD109	4.18119e-14	0.367642	0.603	0.257	6.16934e-10
POLG	4.19353e-14	0.413756	0.603	0.268	6.18756e-10
SLC12A4	4.20592e-14	0.320466	0.413	0.138	6.20584e-10
ANAPC16	4.21609e-14	0.379672	0.508	0.202	6.22084e-10
SRSF7	4.21692e-14	0.42981	0.794	0.406	6.22206e-10
CAPS	4.27802e-14	0.29562	0.381	0.12	6.31222e-10
DALRD3	4.36872e-14	0.267363	0.31	0.083	6.44604e-10
ANKRD10	4.38371e-14	0.393248	0.603	0.265	6.46816e-10
PRPF3	4.45366e-14	0.348847	0.516	0.202	6.57137e-10
NFE2L2	4.47722e-14	0.538599	0.905	0.63	6.60615e-10
SRSF10	4.58682e-14	0.304952	0.333	0.098	6.76785e-10
AFAP1L2	4.59192e-14	0.366357	0.524	0.208	6.77537e-10
LSM4	4.60527e-14	0.38466	0.5	0.194	6.79508e-10
DGAT1	4.60724e-14	0.328285	0.429	0.149	6.79798e-10
NUTF2	4.61206e-14	0.450398	0.683	0.343	6.8051e-10
ST7L	4.82665e-14	0.291508	0.294	0.077	7.12172e-10
RARA	4.87915e-14	0.32584	0.429	0.149	7.19919e-10
FBXW7	4.98699e-14	0.423754	0.698	0.34	7.3583e-10
COX6A1	5.03621e-14	0.473547	0.873	0.6	7.43093e-10
BCAM	5.13915e-14	0.412874	0.571	0.248	7.58282e-10
MAT2A	5.40858e-14	0.500553	0.913	0.641	7.98036e-10
CCDC84	5.41079e-14	0.33394	0.468	0.173	7.98361e-10
VPS26B	5.488e-14	0.366	0.571	0.243	8.09755e-10
TNRC18	5.55489e-14	0.355765	0.556	0.229	8.19625e-10
WDR81	5.59241e-14	0.323033	0.421	0.144	8.2516e-10
SBF2	5.60902e-14	0.283031	0.341	0.1	8.27612e-10
NEPRO	5.66808e-14	0.252872	0.278	0.069	8.36326e-10
SEC31B	5.94001e-14	0.252303	0.27	0.065	8.76449e-10
CAPRIN2	5.9753e-14	0.296832	0.333	0.097	8.81656e-10
ATXN7L3B	6.05542e-14	0.405754	0.611	0.275	8.93477e-10
RAB13	6.0653e-14	0.39824	0.659	0.308	8.94936e-10
AHSA1	6.07249e-14	0.413539	0.579	0.259	8.95996e-10
ZNF507	6.10462e-14	0.330098	0.349	0.108	9.00737e-10
N4BP2L2	6.1909e-14	0.378812	0.651	0.296	9.13468e-10
RANGAP1	6.408e-14	0.408795	0.69	0.342	9.455e-10
ODF3B	6.47146e-14	0.415414	0.69	0.328	9.54863e-10
ATRIP	6.57972e-14	0.262259	0.286	0.073	9.70837e-10
STX10	6.73424e-14	0.315345	0.429	0.15	9.93637e-10
GRWD1	6.7506e-14	0.306778	0.341	0.102	9.96051e-10
CHKB	6.76978e-14	0.389193	0.635	0.296	9.98881e-10
CNPY3	6.91102e-14	0.342517	0.421	0.148	1.01972e-09
SMARCC2	6.91743e-14	0.352396	0.516	0.204	1.02067e-09
PRPF31	7.35753e-14	0.340037	0.437	0.156	1.0856e-09
DHX9	7.38973e-14	0.371419	0.508	0.204	1.09035e-09
NUP85	7.5982e-14	0.394601	0.484	0.192	1.12111e-09
PUF60	7.7448e-14	0.430809	0.667	0.32	1.14275e-09
PRPF38B	7.77281e-14	0.333797	0.452	0.163	1.14688e-09
TSEN2	7.77389e-14	0.292474	0.333	0.098	1.14704e-09
IPO5	7.82625e-14	0.353926	0.444	0.163	1.15476e-09
TGFBRAP1	7.83773e-14	0.287071	0.333	0.097	1.15646e-09
CHD4	7.968e-14	0.387208	0.635	0.292	1.17568e-09
PAXX	8.09829e-14	0.332622	0.46	0.168	1.1949e-09
USP25	8.10912e-14	0.39543	0.587	0.266	1.1965e-09
PRPF4B	8.21906e-14	0.4012	0.706	0.345	1.21272e-09
ADI1	8.23556e-14	0.404599	0.516	0.219	1.21516e-09
METRNL	8.3497e-14	-0.777692	0.5	0.739	1.232e-09
RXRB	8.73109e-14	0.393969	0.532	0.225	1.28827e-09
FAM193B	8.73529e-14	0.39656	0.738	0.365	1.28889e-09
GRTP1	9.10287e-14	0.324867	0.365	0.116	1.34313e-09
AGO2	9.27922e-14	0.354955	0.492	0.194	1.36915e-09
PNO1	9.28618e-14	0.297898	0.325	0.095	1.37018e-09
MPPE1	9.29456e-14	0.32002	0.397	0.134	1.37141e-09
PPIE	9.50862e-14	0.320499	0.476	0.176	1.403e-09
MOGS	9.65326e-14	0.389599	0.587	0.256	1.42434e-09
ZGPAT	9.69277e-14	0.353674	0.508	0.202	1.43017e-09
NUDT19	9.75554e-14	0.354026	0.421	0.151	1.43943e-09
TRPS1	9.83597e-14	0.48695	0.857	0.507	1.4513e-09
LAMB2	9.86491e-14	0.423739	0.754	0.37	1.45557e-09
HSPBAP1	1.00285e-13	0.251726	0.262	0.063	1.4797e-09
TOMM70	1.00496e-13	0.330133	0.46	0.169	1.48282e-09
ORMDL1	1.01656e-13	0.407357	0.579	0.264	1.49994e-09
DDX46	1.06349e-13	0.399609	0.69	0.332	1.56917e-09
CUTA	1.07565e-13	0.3899	0.643	0.293	1.58712e-09
ERP29	1.09478e-13	0.440132	0.683	0.346	1.61535e-09
ZNF428	1.10331e-13	0.359723	0.484	0.186	1.62793e-09
TRIM29	1.10561e-13	0.392954	1	0.995	1.63133e-09
RBM12	1.1139e-13	0.395146	0.532	0.227	1.64357e-09
DCAF4	1.15834e-13	0.284272	0.302	0.083	1.70913e-09
WNT5A	1.16951e-13	0.426387	0.714	0.356	1.72562e-09
UBA2	1.19584e-13	0.33442	0.524	0.21	1.76447e-09
SAMM50	1.24751e-13	0.325364	0.397	0.134	1.8407e-09
ASS1	1.2497e-13	0.421897	0.444	0.167	1.84394e-09
SHPRH	1.26722e-13	0.338581	0.405	0.141	1.86979e-09
HDGFL2	1.29256e-13	0.350184	0.429	0.154	1.90718e-09
GJB3	1.2981e-13	0.300871	0.381	0.125	1.91534e-09
NDUFB6	1.31504e-13	0.360241	0.563	0.24	1.94034e-09
PAQR3	1.31638e-13	0.359396	0.381	0.13	1.94232e-09
EIF2AK1	1.32979e-13	0.327437	0.46	0.173	1.9621e-09
FAAP100	1.33257e-13	0.304465	0.413	0.142	1.96621e-09
BTG3	1.33269e-13	0.421651	0.73	0.365	1.96638e-09
ARID1B	1.33411e-13	0.327943	0.579	0.244	1.96847e-09
HLF	1.33628e-13	0.275915	0.325	0.094	1.97168e-09
USP36	1.34132e-13	0.339217	0.5	0.193	1.97911e-09
PIK3CB	1.34887e-13	0.267321	0.278	0.072	1.99025e-09
CNOT2	1.39946e-13	0.375571	0.476	0.187	2.06491e-09
ENTPD6	1.40249e-13	0.262762	0.302	0.082	2.06938e-09
FERMT1	1.4217e-13	0.379094	0.476	0.187	2.09772e-09
USP31	1.46345e-13	0.273722	0.325	0.095	2.15933e-09
SZRD1	1.48735e-13	0.388631	0.698	0.353	2.19459e-09
NUP62	1.50819e-13	0.404953	0.532	0.229	2.22533e-09
PCMTD2	1.51064e-13	0.327223	0.437	0.158	2.22895e-09
WBP11	1.53383e-13	0.329761	0.437	0.159	2.26317e-09
TTC19	1.61066e-13	0.342544	0.421	0.15	2.37653e-09
JPT1	1.61778e-13	0.420045	0.69	0.337	2.38704e-09
JMJD7	1.62238e-13	0.391467	0.659	0.31	2.39382e-09
FAM76B	1.67462e-13	0.321178	0.389	0.132	2.4709e-09
PPM1G	1.69544e-13	0.441829	0.611	0.295	2.50162e-09
GPD1L	1.70946e-13	0.291444	0.341	0.104	2.52231e-09
CDC27	1.75589e-13	0.287446	0.381	0.124	2.59081e-09
STAG2	1.78168e-13	0.340419	0.516	0.207	2.62886e-09
APTX	1.78226e-13	0.293303	0.389	0.128	2.62973e-09
TRUB2	1.80868e-13	0.288757	0.333	0.099	2.6687e-09
EXOC4	1.85492e-13	0.36544	0.516	0.213	2.73693e-09
DLD	1.86586e-13	0.326296	0.46	0.173	2.75308e-09
DDX31	1.86984e-13	0.27365	0.349	0.107	2.75894e-09
NBAS	1.87733e-13	0.280925	0.325	0.096	2.77e-09
CFDP1	1.87772e-13	0.34063	0.532	0.215	2.77058e-09
ABCB8	1.87822e-13	0.292474	0.317	0.091	2.77132e-09
NFXL1	1.88349e-13	0.268765	0.365	0.114	2.77909e-09
DDX17	1.90127e-13	0.446538	0.984	0.827	2.80533e-09
GGT7	1.90993e-13	0.268734	0.302	0.083	2.8181e-09
YJEFN3	1.91074e-13	0.252558	0.238	0.054	2.8193e-09
SMAD3	1.97305e-13	0.384177	0.46	0.179	2.91123e-09
TRIM65	1.97965e-13	0.306598	0.389	0.13	2.92097e-09
DSP	1.98201e-13	0.379523	1	0.988	2.92445e-09
SPOUT1	1.98259e-13	0.321178	0.381	0.128	2.92531e-09
RTL10	1.9826e-13	0.317742	0.405	0.139	2.92532e-09
RB1	2.00242e-13	0.392145	0.595	0.273	2.95458e-09
IL6R	2.05341e-13	0.342517	0.405	0.141	3.0298e-09
PSME2	2.06036e-13	0.370473	0.611	0.271	3.04006e-09
ILF2	2.12522e-13	0.36926	0.563	0.243	3.13576e-09
LAMTOR4	2.15705e-13	0.431046	0.738	0.387	3.18273e-09
PFDN5	2.17208e-13	0.34241	0.698	0.324	3.2049e-09
ZNF236	2.19735e-13	0.265026	0.278	0.072	3.24219e-09
PICK1	2.22381e-13	0.313141	0.381	0.127	3.28123e-09
GATAD2A	2.28624e-13	0.375545	0.667	0.327	3.37334e-09
PRICKLE3	2.3043e-13	0.275806	0.373	0.121	3.4e-09
FAM122B	2.3601e-13	0.285444	0.357	0.111	3.48233e-09
HNRNPLL	2.36655e-13	0.382084	0.508	0.207	3.49184e-09
PRPF40B	2.40461e-13	0.293517	0.317	0.093	3.54801e-09
MSANTD3	2.43896e-13	0.289436	0.317	0.093	3.59869e-09
TTC14	2.44547e-13	0.31679	0.429	0.154	3.60829e-09
DDX56	2.504e-13	0.371001	0.595	0.269	3.69466e-09
ZNF768	2.52722e-13	0.257362	0.246	0.058	3.72892e-09
EMC1	2.54805e-13	0.290069	0.373	0.121	3.75965e-09
UBXN4	2.5669e-13	0.434623	0.643	0.318	3.78746e-09
ZDHHC1	2.58906e-13	0.309029	0.317	0.094	3.82016e-09
PSMB5	2.59824e-13	0.332106	0.524	0.213	3.83371e-09
ANAPC7	2.6014e-13	0.385719	0.595	0.27	3.83837e-09
ZNRD2	2.60483e-13	0.291015	0.397	0.133	3.84342e-09
CCHCR1	2.65955e-13	0.291508	0.302	0.085	3.92416e-09
RCBTB2	2.66041e-13	0.265109	0.317	0.091	3.92543e-09
SNRPB	2.696e-13	0.3327	0.46	0.173	3.97795e-09
DDX49	2.70461e-13	0.316624	0.429	0.156	3.99065e-09
MAU2	2.70749e-13	0.359784	0.476	0.187	3.99491e-09
CEBPZ	2.72929e-13	0.318062	0.429	0.154	4.02707e-09
EIF3G	2.78197e-13	0.420918	0.754	0.412	4.1048e-09
SLC25A11	2.83e-13	0.339001	0.476	0.187	4.17567e-09
ZNF444	2.87062e-13	0.316456	0.413	0.146	4.2356e-09
RBFA	2.88804e-13	0.328285	0.405	0.141	4.2613e-09
SPSB3	2.88804e-13	0.395019	0.738	0.386	4.2613e-09
NFRKB	2.93012e-13	0.299016	0.349	0.109	4.3234e-09
IMP4	2.97897e-13	0.326892	0.397	0.137	4.39547e-09
TTC23	3.02019e-13	0.286075	0.341	0.105	4.45629e-09
USP14	3.02537e-13	0.328055	0.492	0.193	4.46393e-09
SH2B1	3.03355e-13	0.342727	0.468	0.181	4.476e-09
PTDSS1	3.05195e-13	0.313894	0.349	0.111	4.50316e-09
KRT14	3.09141e-13	0.34188	1	1	4.56137e-09
SF3B1	3.09397e-13	0.434528	0.825	0.479	4.56516e-09
POLA2	3.12469e-13	0.284012	0.317	0.093	4.61048e-09
ELAVL1	3.13665e-13	0.388484	0.54	0.238	4.62813e-09
DGLUCY	3.20019e-13	0.296072	0.341	0.105	4.72188e-09
COL3A1	3.20955e-13	-1.64745	0.968	0.923	4.7357e-09
CASP6	3.25951e-13	0.29675	0.405	0.138	4.8094e-09
KHDRBS1	3.26162e-13	0.451245	0.698	0.362	4.81252e-09
OXLD1	3.33448e-13	0.310315	0.365	0.12	4.92003e-09
XPO1	3.34037e-13	0.331377	0.46	0.177	4.92872e-09
ANAPC1	3.36796e-13	0.282062	0.349	0.109	4.96942e-09
CYTH1	3.37438e-13	0.378701	0.619	0.285	4.97889e-09
LUC7L	3.39729e-13	0.360519	0.706	0.338	5.0127e-09
NSA2	3.42357e-13	0.285792	0.373	0.122	5.05147e-09
SYNGR2	3.48244e-13	0.379048	0.675	0.319	5.13833e-09
BZW2	3.52263e-13	0.280144	0.294	0.081	5.19764e-09
NRARP	3.53142e-13	0.403452	0.627	0.29	5.21061e-09
ANKRD52	3.54265e-13	0.314228	0.476	0.183	5.22717e-09
LUC7L3	3.57215e-13	0.379566	0.73	0.362	5.2707e-09
TWISTNB	3.61011e-13	0.257587	0.278	0.073	5.32672e-09
NCOR1	3.6291e-13	0.369677	0.579	0.251	5.35474e-09
FKBP3	3.68614e-13	0.405904	0.556	0.249	5.43889e-09
AARSD1	3.69398e-13	0.261536	0.333	0.1	5.45046e-09
SECISBP2	3.69963e-13	0.359202	0.54	0.23	5.4588e-09
UHRF2	3.73017e-13	0.306648	0.444	0.164	5.50386e-09
LGALS3BP	3.76037e-13	0.447186	0.913	0.569	5.54842e-09
TIMM13	3.79274e-13	0.389217	0.579	0.257	5.59619e-09
GTF3C6	3.79487e-13	0.360548	0.532	0.223	5.59933e-09
PAM16	3.82533e-13	0.300886	0.325	0.099	5.64428e-09
MTAP	3.83197e-13	0.291762	0.357	0.115	5.65407e-09
GPS1	3.91451e-13	0.401724	0.571	0.26	5.77587e-09
TCFL5	3.92439e-13	0.271513	0.262	0.067	5.79044e-09
MMP2	3.92723e-13	-1.09807	0.198	0.497	5.79463e-09
UNG	3.95058e-13	0.339831	0.389	0.135	5.82908e-09
KIFC2	4.09484e-13	0.403064	0.603	0.273	6.04193e-09
TMEM123	4.09982e-13	0.365489	0.579	0.257	6.04928e-09
ABCE1	4.11345e-13	0.281687	0.333	0.101	6.0694e-09
ATP5PF	4.19114e-13	0.358672	0.611	0.28	6.18403e-09
RBM19	4.22699e-13	0.281479	0.365	0.117	6.23693e-09
MICOS10	4.23447e-13	0.39185	0.627	0.297	6.24795e-09
INTS10	4.24288e-13	0.301088	0.46	0.17	6.26036e-09
TIMM9	4.24552e-13	0.273164	0.365	0.116	6.26427e-09
RNF123	4.24745e-13	0.344066	0.508	0.208	6.26711e-09
CAND1	4.28879e-13	0.346449	0.5	0.203	6.32812e-09
KMT2A	4.35983e-13	0.299053	0.397	0.136	6.43293e-09
ARPP19	4.3842e-13	0.412067	0.595	0.28	6.46889e-09
L3MBTL1	4.39412e-13	0.277121	0.254	0.063	6.48353e-09
PABPC1L	4.74924e-13	0.322491	0.365	0.121	7.0075e-09
MSL2	4.80498e-13	0.329568	0.405	0.142	7.08975e-09
PRORP	4.81374e-13	0.27821	0.317	0.094	7.10268e-09
RFX5	4.83565e-13	0.285858	0.405	0.139	7.135e-09
PEX6	4.86248e-13	0.300856	0.413	0.146	7.17459e-09
IQCB1	4.90283e-13	0.28942	0.357	0.115	7.23413e-09
LUM	4.92263e-13	-1.11251	0.27	0.553	7.26335e-09
SHPK	4.93308e-13	0.258646	0.31	0.089	7.27875e-09
NDUFB10	4.97396e-13	0.399645	0.587	0.271	7.33908e-09
PNISR	5.11565e-13	0.415836	0.754	0.416	7.54814e-09
TSPO	5.11844e-13	0.427585	0.952	0.737	7.55226e-09
RNPEP	5.13788e-13	0.341711	0.524	0.218	7.58095e-09
TIMM50	5.21831e-13	0.332867	0.341	0.109	7.69962e-09
SH2D3A	5.27642e-13	0.300078	0.341	0.107	7.78536e-09
MTOR	5.43783e-13	0.324567	0.421	0.154	8.02351e-09
CDC25B	5.49368e-13	0.500537	0.548	0.257	8.10593e-09
MAP6D1	5.64954e-13	0.262259	0.286	0.078	8.3359e-09
ORMDL3	5.69593e-13	0.296304	0.437	0.159	8.40434e-09
UBE2L6	5.76594e-13	0.347651	0.556	0.24	8.50764e-09
NCKAP1	5.7737e-13	0.454268	0.889	0.632	8.51909e-09
COL18A1	5.88303e-13	0.412356	0.706	0.335	8.68041e-09
ANKLE2	5.92905e-13	0.37301	0.579	0.257	8.74831e-09
MEX3D	5.9981e-13	0.390035	0.532	0.232	8.8502e-09
SPICE1	6.00245e-13	0.297406	0.349	0.112	8.85661e-09
GSPT1	6.02834e-13	0.351262	0.508	0.213	8.89482e-09
GRK6	6.14333e-13	0.299556	0.365	0.12	9.06448e-09
SLC27A1	6.21083e-13	0.298463	0.325	0.099	9.16408e-09
PTK2	6.24445e-13	0.383056	0.571	0.259	9.21368e-09
PHF19	6.30888e-13	0.33863	0.397	0.141	9.30875e-09
MORC4	6.38704e-13	0.308551	0.397	0.138	9.42407e-09
ETFA	6.4794e-13	0.371072	0.524	0.228	9.56036e-09
AXIN1	6.53955e-13	0.303846	0.325	0.1	9.64911e-09
SMC6	6.54208e-13	0.283399	0.333	0.102	9.65284e-09
TUT4	6.57941e-13	0.309381	0.429	0.157	9.70792e-09
TRIM56	6.59489e-13	0.342404	0.373	0.128	9.73077e-09
LMNB1	6.65537e-13	0.268717	0.262	0.068	9.82001e-09
ALAD	6.82372e-13	0.418504	0.579	0.265	1.00684e-08
MINK1	6.91278e-13	0.426395	0.897	0.571	1.01998e-08
IMMP2L	6.97589e-13	0.253133	0.238	0.056	1.02929e-08
PSMC5	7.15264e-13	0.404527	0.754	0.4	1.05537e-08
DOP1A	7.21302e-13	0.279003	0.333	0.103	1.06428e-08
SETD5	7.30195e-13	0.304123	0.444	0.166	1.0774e-08
CPSF3	7.34138e-13	0.271923	0.302	0.086	1.08322e-08
EHMT1	7.3563e-13	0.337382	0.571	0.249	1.08542e-08
GABPB2	7.38987e-13	0.270542	0.333	0.102	1.09038e-08
ITPK1	7.4904e-13	0.286369	0.31	0.091	1.10521e-08
TRIM14	7.64831e-13	0.332303	0.421	0.156	1.12851e-08
RSAD1	7.87981e-13	0.297967	0.357	0.116	1.16267e-08
FDFT1	8.06659e-13	0.373561	0.508	0.217	1.19023e-08
FAT2	8.28933e-13	0.390559	0.762	0.375	1.22309e-08
ETFB	8.31853e-13	0.359257	0.524	0.222	1.2274e-08
MSI2	8.31876e-13	0.307266	0.397	0.138	1.22743e-08
ATXN10	8.41635e-13	0.374739	0.603	0.28	1.24183e-08
FBXL19	8.4415e-13	0.352617	0.452	0.179	1.24554e-08
UQCRB	8.50175e-13	0.395179	0.714	0.375	1.25443e-08
SUZ12	8.52877e-13	0.275501	0.317	0.095	1.25842e-08
FXYD3	8.74243e-13	0.400227	0.905	0.48	1.28995e-08
ZBED5	8.76279e-13	0.341403	0.437	0.163	1.29295e-08
ECHS1	8.76699e-13	0.368664	0.603	0.275	1.29357e-08
ISOC1	8.78027e-13	0.262392	0.317	0.095	1.29553e-08
SSBP1	8.81873e-13	0.389942	0.595	0.284	1.3012e-08
SAT1	8.97618e-13	0.489217	0.873	0.594	1.32444e-08
SERPINB13	9.02669e-13	-0.900764	0.437	0.683	1.33189e-08
ENOPH1	9.07234e-13	0.323425	0.429	0.16	1.33862e-08
IRF3	9.13258e-13	0.321299	0.635	0.288	1.34751e-08
MAP3K1	9.14222e-13	0.348824	0.532	0.23	1.34894e-08
UPF3A	9.46353e-13	0.281687	0.325	0.099	1.39634e-08
ELF2	9.50753e-13	0.31388	0.468	0.183	1.40284e-08
RBM23	9.53166e-13	0.380608	0.54	0.244	1.4064e-08
PDS5B	9.73921e-13	0.270558	0.31	0.091	1.43702e-08
ZNF593	9.77597e-13	0.267363	0.302	0.087	1.44244e-08
DAG1	9.82125e-13	0.33787	0.468	0.186	1.44913e-08
PARP8	9.8888e-13	0.295183	0.397	0.138	1.45909e-08
MBD2	9.90852e-13	0.451416	0.802	0.467	1.462e-08
FBXL4	1.00488e-12	0.283271	0.302	0.088	1.4827e-08
NDUFB11	1.00685e-12	0.381624	0.587	0.275	1.4856e-08
FASTK	1.02851e-12	0.324714	0.571	0.246	1.51756e-08
WASF2	1.02964e-12	0.420354	0.857	0.519	1.51923e-08
BNC1	1.03483e-12	0.351244	0.484	0.194	1.52689e-08
EBNA1BP2	1.06558e-12	0.344102	0.516	0.216	1.57226e-08
M6PR	1.07447e-12	0.353861	0.444	0.174	1.58538e-08
KIAA0319L	1.07821e-12	0.306267	0.476	0.188	1.5909e-08
DCXR	1.08297e-12	0.33468	0.532	0.225	1.59792e-08
ZNF318	1.08408e-12	0.308581	0.286	0.081	1.59956e-08
SYMPK	1.11147e-12	0.385393	0.524	0.229	1.63997e-08
MCM3AP	1.11278e-12	0.299344	0.444	0.166	1.6419e-08
IGHG4	1.11633e-12	-1.90389	0.143	0.445	1.64715e-08
ZFP64	1.12537e-12	0.320319	0.389	0.136	1.66048e-08
ORAI3	1.13341e-12	0.291444	0.341	0.11	1.67234e-08
PI4KA	1.13683e-12	0.32835	0.5	0.203	1.67739e-08
KPNA4	1.15041e-12	0.422024	0.738	0.413	1.69743e-08
PPP4R3A	1.15955e-12	0.399338	0.69	0.359	1.71091e-08
TAGLN2	1.17237e-12	0.455197	0.976	0.876	1.72983e-08
EPM2AIP1	1.19366e-12	0.277261	0.317	0.096	1.76124e-08
XRCC1	1.20295e-12	0.283031	0.325	0.1	1.77496e-08
INTS3	1.20375e-12	0.33179	0.476	0.19	1.77613e-08
NEFM	1.20598e-12	0.324064	0.373	0.126	1.77943e-08
TNPO2	1.20952e-12	0.357399	0.468	0.189	1.78465e-08
SDCCAG8	1.21314e-12	0.298786	0.373	0.125	1.78998e-08
SPPL2A	1.23888e-12	0.296304	0.437	0.162	1.82796e-08
FRA10AC1	1.24797e-12	0.291067	0.357	0.117	1.84138e-08
CLK1	1.25267e-12	0.349553	0.754	0.387	1.84831e-08
MGME1	1.25639e-12	0.313894	0.341	0.111	1.85381e-08
REX1BD	1.26671e-12	0.417582	0.595	0.284	1.86903e-08
KRIT1	1.27653e-12	0.284325	0.421	0.151	1.88352e-08
SNX1	1.28451e-12	0.377893	0.643	0.311	1.8953e-08
API5	1.2893e-12	0.302734	0.516	0.21	1.90237e-08
ATP10D	1.30445e-12	0.357019	0.508	0.213	1.92471e-08
ISY1	1.33583e-12	0.291015	0.405	0.146	1.97101e-08
ZBTB4	1.33699e-12	0.356625	0.579	0.258	1.97273e-08
ANXA4	1.34738e-12	0.34526	0.492	0.203	1.98807e-08
SSBP2	1.35185e-12	0.262884	0.31	0.091	1.99465e-08
ASH2L	1.35279e-12	0.264714	0.325	0.099	1.99603e-08
NELFCD	1.42925e-12	0.340346	0.484	0.196	2.10886e-08
LAS1L	1.43102e-12	0.27457	0.325	0.1	2.11147e-08
RABL3	1.49841e-12	0.278609	0.317	0.097	2.21091e-08
KIAA0753	1.50206e-12	0.28565	0.286	0.081	2.21628e-08
NPTN	1.51179e-12	0.365691	0.627	0.295	2.23065e-08
C1R	1.51195e-12	-1.12643	0.397	0.597	2.23088e-08
LETMD1	1.52115e-12	0.298033	0.397	0.14	2.24446e-08
KMT2D	1.52449e-12	0.382706	0.675	0.342	2.24938e-08
SMAD5	1.53163e-12	0.321467	0.373	0.129	2.25992e-08
ELP1	1.55956e-12	0.276324	0.333	0.105	2.30113e-08
EIF2B3	1.57057e-12	0.261035	0.31	0.091	2.31737e-08
RBM5	1.61561e-12	0.398805	0.659	0.327	2.38383e-08
CAPN10	1.6377e-12	0.300856	0.397	0.139	2.41642e-08
ZNF131	1.64949e-12	0.327543	0.444	0.174	2.43382e-08
IFRD2	1.65694e-12	0.289724	0.389	0.135	2.44481e-08
COMMD5	1.70338e-12	0.275701	0.389	0.135	2.51333e-08
MRFAP1L1	1.73068e-12	0.379801	0.683	0.327	2.55361e-08
PXN	1.8117e-12	0.290703	0.381	0.132	2.67317e-08
STOML2	1.81773e-12	0.341467	0.46	0.186	2.68206e-08
CNDP2	1.84246e-12	0.354955	0.659	0.322	2.71855e-08
PGLS	1.8452e-12	0.378441	0.579	0.273	2.72259e-08
ACSS1	1.85256e-12	0.36377	0.437	0.172	2.73346e-08
SLC35B2	1.85851e-12	0.299016	0.349	0.115	2.74223e-08
EPC2	1.86558e-12	0.34534	0.532	0.231	2.75267e-08
ISG20L2	1.87606e-12	0.280909	0.373	0.126	2.76812e-08
VDAC1	1.89945e-12	0.343305	0.635	0.295	2.80264e-08
BAP1	1.90482e-12	0.281687	0.333	0.106	2.81057e-08
SURF6	1.9195e-12	0.384296	0.484	0.206	2.83223e-08
PGRMC2	1.9242e-12	0.369765	0.722	0.372	2.83915e-08
PGAP1	1.92451e-12	0.253701	0.262	0.07	2.83961e-08
ATP5MC2	1.92516e-12	0.396345	0.611	0.294	2.84058e-08
CDC42EP1	1.95788e-12	0.378678	0.643	0.313	2.88885e-08
MFF	1.96643e-12	0.333151	0.492	0.205	2.90147e-08
DR1	1.97497e-12	0.338252	0.532	0.23	2.91407e-08
USP24	1.97717e-12	0.2828	0.349	0.113	2.91731e-08
SCAP	2.02178e-12	0.311597	0.46	0.179	2.98314e-08
FOXP1	2.04743e-12	0.340055	0.619	0.282	3.02099e-08
TSR1	2.05374e-12	0.320611	0.413	0.154	3.0303e-08
PUS1	2.09028e-12	0.276444	0.302	0.089	3.08421e-08
GIGYF2	2.13361e-12	0.35242	0.492	0.204	3.14814e-08
ENDOV	2.14939e-12	0.272412	0.278	0.078	3.17142e-08
GATD1	2.15942e-12	0.381921	0.54	0.242	3.18622e-08
GSTA4	2.18024e-12	0.368284	0.579	0.262	3.21694e-08
TMEM160	2.19242e-12	0.30583	0.444	0.17	3.23491e-08
BMS1	2.21541e-12	0.374492	0.548	0.246	3.26884e-08
USP21	2.23214e-12	0.297762	0.397	0.142	3.29353e-08
SELENOH	2.2987e-12	0.376915	0.722	0.379	3.39173e-08
MTR	2.33439e-12	0.266058	0.325	0.101	3.4444e-08
ALG13	2.37028e-12	0.35336	0.54	0.233	3.49735e-08
PRR12	2.37772e-12	0.386738	0.524	0.233	3.50833e-08
QRICH1	2.38394e-12	0.384345	0.548	0.246	3.5175e-08
SLC35F2	2.39298e-12	0.293712	0.349	0.115	3.53084e-08
RNF168	2.39426e-12	0.333437	0.524	0.225	3.53273e-08
ATP2B4	2.43517e-12	0.277001	0.373	0.127	3.59309e-08
SOX4	2.48773e-12	0.44397	0.595	0.298	3.67064e-08
CUL4A	2.50821e-12	0.329676	0.667	0.312	3.70086e-08
SPIN1	2.54267e-12	0.334287	0.468	0.186	3.75172e-08
MTSS2	2.54381e-12	0.345416	0.571	0.256	3.7534e-08
HPF1	2.56586e-12	0.271005	0.31	0.094	3.78592e-08
SFI1	2.5684e-12	0.334849	0.413	0.156	3.78968e-08
SAFB	2.61111e-12	0.373718	0.667	0.335	3.8527e-08
PEX11B	2.6238e-12	0.313162	0.421	0.159	3.87142e-08
RCE1	2.64161e-12	0.298033	0.405	0.148	3.89769e-08
TARBP2	2.70035e-12	0.300609	0.349	0.115	3.98437e-08
LYPD3	2.70346e-12	-0.736367	0.937	0.955	3.98895e-08
PRMT7	2.71137e-12	0.263481	0.357	0.119	4.00063e-08
TRIM26	2.71753e-12	0.365085	0.595	0.275	4.00972e-08
RCN2	2.74023e-12	0.35481	0.492	0.208	4.0432e-08
DROSHA	2.75006e-12	0.345108	0.413	0.157	4.05771e-08
DLAT	2.82337e-12	0.289091	0.341	0.111	4.16588e-08
NSD3	2.8379e-12	0.327255	0.516	0.219	4.18733e-08
CRTAP	2.92125e-12	0.267863	0.333	0.106	4.3103e-08
ZNF282	2.94719e-12	0.292474	0.317	0.1	4.34858e-08
SNRNP200	2.99665e-12	0.416317	0.667	0.354	4.42156e-08
SMARCD2	3.02376e-12	0.345373	0.556	0.243	4.46156e-08
SLC25A10	3.07597e-12	0.276376	0.429	0.159	4.53859e-08
HIC2	3.1075e-12	0.256202	0.27	0.074	4.58511e-08
NOL3	3.13723e-12	0.316025	0.429	0.163	4.62898e-08
POLE	3.16264e-12	0.266525	0.333	0.106	4.66648e-08
IGKV4-1	3.19481e-12	-1.38879	0.087	0.392	4.71394e-08
TAPBP	3.19672e-12	0.376523	0.81	0.417	4.71675e-08
SELENOO	3.25242e-12	0.35457	0.532	0.235	4.79895e-08
DOT1L	3.28573e-12	0.319487	0.421	0.16	4.8481e-08
PQBP1	3.30238e-12	0.333575	0.405	0.151	4.87266e-08
NT5DC2	3.30775e-12	0.315942	0.5	0.209	4.88058e-08
STX16	3.37663e-12	0.382984	0.69	0.357	4.98222e-08
CFAP298	3.38234e-12	0.310176	0.452	0.179	4.99064e-08
STRAP	3.41767e-12	0.371792	0.643	0.314	5.04277e-08
SH3RF2	3.42466e-12	0.380658	0.778	0.394	5.05308e-08
SSNA1	3.43804e-12	0.326382	0.524	0.223	5.07283e-08
PDZD2	3.44276e-12	0.338865	0.421	0.158	5.07979e-08
MAFK	3.44586e-12	0.30998	0.452	0.178	5.08437e-08
NDUFB2	3.45507e-12	0.353227	0.563	0.258	5.09795e-08
OPA1	3.58902e-12	0.303707	0.492	0.2	5.2956e-08
HSPA1A	3.60757e-12	0.441438	0.841	0.5	5.32298e-08
SPATA20	3.62509e-12	0.314601	0.421	0.158	5.34882e-08
PSMA4	3.66469e-12	0.402207	0.698	0.372	5.40725e-08
ORAI1	3.67046e-12	0.266939	0.317	0.099	5.41576e-08
LPCAT3	3.69904e-12	0.260361	0.27	0.075	5.45793e-08
PMF1	3.72208e-12	0.333224	0.492	0.206	5.49193e-08
RCL1	3.74901e-12	0.271479	0.278	0.078	5.53166e-08
MOB1B	3.76428e-12	0.255366	0.286	0.082	5.5542e-08
PAK6	3.91033e-12	0.298301	0.405	0.15	5.76969e-08
NOL12	3.91244e-12	0.38927	0.508	0.226	5.7728e-08
PLPP2	4.03108e-12	0.304699	0.397	0.144	5.94785e-08
TERF2	4.06938e-12	0.291324	0.405	0.149	6.00437e-08
IWS1	4.08148e-12	0.332054	0.381	0.138	6.02222e-08
AP1M1	4.08483e-12	0.295468	0.397	0.143	6.02716e-08
RNF216	4.11201e-12	0.325167	0.444	0.177	6.06727e-08
BTAF1	4.11909e-12	0.349828	0.603	0.287	6.07771e-08
NFKBIL1	4.13472e-12	0.268293	0.31	0.095	6.10077e-08
LRRC14	4.18324e-12	0.309423	0.381	0.136	6.17238e-08
LARP7	4.23038e-12	0.265266	0.365	0.124	6.24192e-08
SLC12A9	4.23708e-12	0.266525	0.325	0.102	6.25181e-08
HRAS	4.30101e-12	0.409545	0.683	0.354	6.34614e-08
OTX1	4.32582e-12	0.275717	0.246	0.064	6.38274e-08
KDF1	4.49381e-12	0.263642	0.278	0.079	6.63062e-08
PYCR2	4.52809e-12	0.280002	0.437	0.164	6.68119e-08
DNAJC10	4.78884e-12	0.253468	0.325	0.102	7.06593e-08
TENM4	4.83239e-12	0.267443	0.341	0.11	7.1302e-08
TAP1	4.8641e-12	0.343056	0.54	0.238	7.17699e-08
PHF14	4.87086e-12	0.277129	0.357	0.122	7.18695e-08
VPS28	4.96798e-12	0.362632	0.69	0.348	7.33026e-08
CKB	4.97457e-12	0.400844	0.548	0.249	7.33998e-08
SMARCB1	5.10857e-12	0.363393	0.548	0.247	7.5377e-08
PFN1	5.12325e-12	0.351283	0.992	0.923	7.55936e-08
ADK	5.15292e-12	0.307736	0.54	0.235	7.60314e-08
FIS1	5.2151e-12	0.373529	0.603	0.292	7.69488e-08
NHP2	5.22161e-12	0.353615	0.492	0.211	7.70448e-08
MBNL1	5.30746e-12	0.364475	0.635	0.312	7.83115e-08
ADH5	5.37335e-12	0.337455	0.405	0.154	7.92837e-08
PTEN	5.4524e-12	0.33415	0.452	0.182	8.04502e-08
SLIRP	5.60226e-12	0.34063	0.524	0.231	8.26613e-08
HSPH1	5.77269e-12	0.301808	0.468	0.187	8.5176e-08
TRMU	5.78929e-12	0.284572	0.389	0.139	8.5421e-08
PHLPP1	5.92385e-12	0.25237	0.302	0.09	8.74064e-08
GUK1	5.95851e-12	0.401127	0.905	0.661	8.79178e-08
TSPAN14	6.01954e-12	0.386443	0.659	0.339	8.88182e-08
DNAJC8	6.31185e-12	0.265857	0.429	0.161	9.31313e-08
HIST1H2BG	6.47934e-12	0.346365	0.373	0.135	9.56026e-08
KLHL21	6.56044e-12	0.322155	0.611	0.287	9.67994e-08
CERS2	6.61176e-12	0.282003	0.397	0.144	9.75565e-08
NAA15	6.62274e-12	0.269194	0.302	0.093	9.77186e-08
AKR1C2	6.65376e-12	0.378024	0.421	0.163	9.81762e-08
URB1	6.74434e-12	0.328592	0.397	0.148	9.95127e-08
COX7A2L	6.78842e-12	0.283287	0.389	0.139	1.00163e-07
ARFGAP2	6.81525e-12	0.320911	0.484	0.202	1.00559e-07
ARHGAP12	6.84171e-12	0.294604	0.373	0.133	1.00949e-07
HMGN4	6.98295e-12	0.269224	0.405	0.148	1.03033e-07
GTF3A	7.30412e-12	0.334917	0.413	0.16	1.07772e-07
LSM2	7.44574e-12	0.256152	0.325	0.104	1.09862e-07
PML	7.52829e-12	0.379015	0.54	0.244	1.1108e-07
C19orf53	7.59056e-12	0.327654	0.532	0.237	1.11999e-07
SLC25A1	7.61834e-12	0.267894	0.365	0.127	1.12409e-07
MED15	7.65756e-12	0.369281	0.587	0.28	1.12987e-07
TBRG1	7.71894e-12	0.372821	0.524	0.239	1.13893e-07
COA8	7.84757e-12	0.252675	0.341	0.112	1.15791e-07
PPRC1	7.8504e-12	0.287181	0.429	0.164	1.15833e-07
STK39	7.85168e-12	0.345284	0.492	0.209	1.15852e-07
UBXN6	7.93416e-12	0.41102	0.77	0.445	1.17069e-07
SHMT2	7.95334e-12	0.311597	0.452	0.181	1.17351e-07
LMAN2	7.96014e-12	0.38587	0.722	0.378	1.17452e-07
COX19	7.96109e-12	0.256152	0.317	0.1	1.17466e-07
SMG6	7.98216e-12	0.307483	0.413	0.159	1.17777e-07
MCCC1	7.98279e-12	0.317277	0.421	0.162	1.17786e-07
ATXN3	8.05433e-12	0.298095	0.421	0.159	1.18842e-07
ABCA7	8.17916e-12	0.363916	0.595	0.283	1.20684e-07
SUPT20H	8.28793e-12	0.285444	0.349	0.12	1.22288e-07
CPNE1	8.36415e-12	0.378157	0.611	0.305	1.23413e-07
NDUFV2	8.38194e-12	0.331883	0.365	0.132	1.23676e-07
RALGAPA1	8.49094e-12	0.324987	0.5	0.214	1.25284e-07
TUSC3	8.50906e-12	0.251892	0.325	0.103	1.25551e-07
RPA1	8.60606e-12	0.314425	0.421	0.163	1.26982e-07
FBXW4	8.66691e-12	0.347651	0.524	0.237	1.2788e-07
MTFR1L	8.74315e-12	0.351106	0.524	0.231	1.29005e-07
MAP7	8.77722e-12	0.414672	0.635	0.336	1.29508e-07
ACO2	8.88224e-12	0.339383	0.5	0.215	1.31058e-07
COQ4	9.06553e-12	0.364064	0.587	0.283	1.33762e-07
RECQL5	9.20962e-12	0.252128	0.333	0.109	1.35888e-07
FADD	9.55481e-12	0.295183	0.389	0.142	1.40981e-07
SND1	9.71304e-12	0.326219	0.73	0.362	1.43316e-07
C8orf33	9.71383e-12	0.295036	0.349	0.121	1.43328e-07
PTAR1	9.82719e-12	0.267831	0.302	0.094	1.45e-07
LTB4R2	9.87037e-12	0.323403	0.333	0.113	1.45637e-07
XRCC5	9.91529e-12	0.376982	0.738	0.395	1.463e-07
CHTOP	9.94627e-12	0.390549	0.698	0.384	1.46757e-07
COG8	9.957e-12	0.27365	0.325	0.106	1.46915e-07
IQANK1	1.00924e-11	0.273581	0.365	0.128	1.48914e-07
NOL8	1.01182e-11	0.277391	0.365	0.127	1.49293e-07
AAMP	1.02734e-11	0.3667	0.556	0.262	1.51584e-07
CCT7	1.03519e-11	0.385298	0.563	0.268	1.52743e-07
TBX1	1.06669e-11	0.289683	0.437	0.17	1.5739e-07
TRAPPC12	1.08117e-11	0.309923	0.484	0.202	1.59527e-07
PSMB4	1.08663e-11	0.376871	0.738	0.399	1.60332e-07
ATP5F1B	1.08667e-11	0.408898	0.913	0.712	1.60338e-07
NQO1	1.08867e-11	0.394837	0.437	0.183	1.60633e-07
TUBGCP5	1.09045e-11	0.251811	0.294	0.088	1.60896e-07
RBM25	1.09163e-11	0.438966	0.627	0.333	1.6107e-07
PDLIM4	1.0964e-11	0.387925	0.563	0.269	1.61774e-07
SNRPA	1.10147e-11	0.285444	0.341	0.115	1.62522e-07
LRBA	1.10379e-11	0.321588	0.46	0.191	1.62865e-07
MDH2	1.10913e-11	0.354135	0.611	0.294	1.63653e-07
ATG4B	1.11675e-11	0.296769	0.5	0.21	1.64777e-07
PBRM1	1.13145e-11	0.346449	0.476	0.204	1.66945e-07
COQ9	1.15599e-11	0.262519	0.333	0.11	1.70566e-07
EBF4	1.15939e-11	0.290795	0.294	0.09	1.71068e-07
YTHDF1	1.20113e-11	0.332929	0.46	0.19	1.77226e-07
NUMA1	1.22341e-11	0.384098	0.865	0.537	1.80515e-07
PABPC1	1.23212e-11	0.273053	0.992	0.982	1.81799e-07
TRIM22	1.2629e-11	0.356475	0.698	0.338	1.86341e-07
STRIP1	1.2735e-11	0.288757	0.429	0.166	1.87904e-07
MGST3	1.27459e-11	0.354637	0.524	0.24	1.88066e-07
EFNB1	1.29412e-11	0.299344	0.421	0.162	1.90947e-07
TOM1L1	1.31577e-11	0.290388	0.357	0.125	1.94142e-07
VPS36	1.31867e-11	0.383	0.635	0.32	1.9457e-07
HNRNPU	1.33925e-11	0.384087	0.754	0.414	1.97607e-07
MTG1	1.34496e-11	0.382574	0.556	0.271	1.98449e-07
FUBP1	1.34707e-11	0.334292	0.556	0.253	1.9876e-07
ROBO1	1.37731e-11	0.305263	0.611	0.279	2.03222e-07
GRAMD1A	1.38474e-11	0.261677	0.341	0.114	2.04319e-07
EXPH5	1.39953e-11	0.353803	0.659	0.32	2.065e-07
GLG1	1.4034e-11	0.334712	0.611	0.291	2.07071e-07
ORC4	1.40471e-11	0.255342	0.325	0.106	2.07265e-07
TRIM35	1.4066e-11	0.265657	0.333	0.11	2.07543e-07
H2AFX	1.41397e-11	0.316911	0.341	0.117	2.08631e-07
GLI4	1.42069e-11	0.292525	0.421	0.162	2.09623e-07
MARK3	1.42132e-11	0.347651	0.683	0.352	2.09716e-07
PRR14	1.42494e-11	0.322025	0.405	0.156	2.1025e-07
YBEY	1.4632e-11	0.257587	0.262	0.074	2.15895e-07
ANAPC4	1.48522e-11	0.290748	0.333	0.112	2.19144e-07
UQCRC2	1.49204e-11	0.300582	0.508	0.215	2.2015e-07
TMEM131L	1.52315e-11	0.250449	0.294	0.089	2.24741e-07
RNF227	1.5343e-11	0.263228	0.373	0.132	2.26385e-07
ZNF133	1.53721e-11	0.27407	0.333	0.111	2.26815e-07
ATF4	1.56786e-11	0.337847	0.611	0.292	2.31338e-07
TACSTD2	1.62261e-11	-0.751935	0.794	0.892	2.39416e-07
CHL1	1.62777e-11	0.289062	0.46	0.186	2.40177e-07
CCDC9	1.67551e-11	0.340596	0.5	0.218	2.47221e-07
XRN2	1.70391e-11	0.321178	0.429	0.173	2.51412e-07
STAT6	1.7134e-11	0.401806	0.77	0.439	2.52812e-07
STX8	1.71627e-11	0.25903	0.349	0.12	2.53236e-07
SCAF1	1.71983e-11	0.347651	0.54	0.247	2.53761e-07
PPP2R1B	1.73539e-11	0.291382	0.357	0.127	2.56056e-07
CCNL2	1.744e-11	0.388873	0.96	0.734	2.57328e-07
CSNK1G2	1.75402e-11	0.357148	0.714	0.371	2.58805e-07
MTRES1	1.77283e-11	0.250905	0.254	0.071	2.61582e-07
LZIC	1.81897e-11	0.287779	0.365	0.131	2.6839e-07
QSER1	1.83751e-11	0.289406	0.373	0.135	2.71124e-07
ST13	1.85502e-11	0.351157	0.508	0.228	2.73708e-07
KDM5A	1.93337e-11	0.306648	0.405	0.156	2.85268e-07
SLC25A28	1.96741e-11	0.396978	0.611	0.302	2.90291e-07
CCER2	1.97044e-11	2.79882	0.397	0.181	2.90739e-07
KLHDC2	1.98976e-11	0.288448	0.437	0.169	2.9359e-07
DICER1	2.01078e-11	0.296576	0.429	0.169	2.96691e-07
XPO6	2.01365e-11	0.303028	0.46	0.189	2.97113e-07
ATF7	2.02166e-11	0.296576	0.421	0.163	2.98296e-07
DNAJC7	2.04562e-11	0.330894	0.579	0.269	3.01831e-07
TXNL4A	2.04884e-11	0.385686	0.627	0.327	3.02306e-07
STARD7	2.05985e-11	0.292908	0.397	0.151	3.0393e-07
RNF121	2.09077e-11	0.25953	0.349	0.12	3.08493e-07
MTERF4	2.09648e-11	0.347651	0.492	0.215	3.09336e-07
PFKL	2.10417e-11	0.368261	0.643	0.334	3.1047e-07
PITX2	2.11754e-11	0.303734	0.802	0.418	3.12443e-07
RBBP7	2.12394e-11	0.286303	0.452	0.181	3.13387e-07
BCLAF1	2.13828e-11	0.388942	0.675	0.365	3.15503e-07
PURB	2.148e-11	0.341309	0.627	0.301	3.16937e-07
SEMA4C	2.14894e-11	0.290253	0.476	0.194	3.17076e-07
EIF4EBP3	2.16197e-11	0.323552	0.421	0.168	3.18999e-07
RGMB	2.17147e-11	0.260878	0.27	0.079	3.20401e-07
MRTFB	2.20655e-11	0.296676	0.452	0.184	3.25577e-07
IFT27	2.22059e-11	0.265993	0.286	0.087	3.27648e-07
TMED4	2.25113e-11	0.296576	0.429	0.172	3.32154e-07
TEP1	2.28121e-11	0.252922	0.31	0.099	3.36593e-07
PSMG2	2.29868e-11	0.331206	0.413	0.165	3.3917e-07
FKBP5	2.30963e-11	0.302088	0.437	0.176	3.40786e-07
STX6	2.38155e-11	0.333778	0.532	0.236	3.51398e-07
SMC3	2.39537e-11	0.271771	0.397	0.148	3.53437e-07
UBTF	2.40052e-11	0.366759	0.746	0.393	3.54197e-07
EIF3M	2.41331e-11	0.378024	0.659	0.349	3.56084e-07
MLLT1	2.43499e-11	0.342017	0.548	0.248	3.59282e-07
ROBO3	2.43921e-11	0.26069	0.325	0.108	3.59905e-07
PXMP2	2.46578e-11	0.264136	0.27	0.079	3.63827e-07
PLXNA3	2.48072e-11	0.303176	0.389	0.147	3.66031e-07
SNAPC3	2.50893e-11	0.255297	0.405	0.151	3.70193e-07
UCKL1	2.51528e-11	0.312825	0.452	0.189	3.7113e-07
PFDN6	2.5402e-11	0.279981	0.381	0.141	3.74807e-07
PPP3R1	2.59124e-11	0.339217	0.476	0.207	3.82337e-07
CBLC	2.611e-11	0.324645	0.468	0.199	3.85253e-07
CAPG	2.61758e-11	0.390533	0.841	0.525	3.86224e-07
PSMB8	2.65998e-11	0.323073	0.444	0.183	3.92479e-07
SIK2	2.66284e-11	0.254271	0.31	0.1	3.92901e-07
CDH24	2.69649e-11	0.250674	0.27	0.079	3.97866e-07
TMEM134	2.70694e-11	0.400523	0.722	0.397	3.99409e-07
CCDC137	2.72183e-11	0.289406	0.365	0.131	4.01607e-07
TAB1	2.72249e-11	0.253499	0.365	0.129	4.01704e-07
ZNF638	2.73873e-11	0.339217	0.468	0.204	4.041e-07
MTIF3	2.75546e-11	0.324528	0.476	0.207	4.06569e-07
TMEM159	2.76229e-11	0.36913	0.468	0.206	4.07577e-07
RGP1	2.76539e-11	0.273226	0.317	0.105	4.08034e-07
AHDC1	2.85666e-11	0.421467	0.722	0.415	4.215e-07
GOPC	2.88608e-11	0.285538	0.508	0.217	4.25842e-07
RORA	2.89912e-11	0.377669	0.698	0.354	4.27765e-07
PDPR	2.9117e-11	0.278907	0.413	0.159	4.29621e-07
CLCN7	2.93909e-11	0.294391	0.5	0.214	4.33663e-07
ZPR1	2.9494e-11	0.335809	0.357	0.132	4.35184e-07
CYHR1	2.96968e-11	0.355068	0.437	0.184	4.38176e-07
CPNE3	3.00258e-11	0.306428	0.397	0.153	4.43031e-07
SMYD2	3.00776e-11	0.272742	0.333	0.113	4.43794e-07
B4GALT2	3.01048e-11	0.261677	0.333	0.112	4.44197e-07
PPL	3.01502e-11	-0.960341	0.825	0.888	4.44866e-07
NDUFA10	3.05202e-11	0.329532	0.556	0.258	4.50325e-07
EXD2	3.06352e-11	0.266058	0.317	0.105	4.52022e-07
SMARCA4	3.12358e-11	0.334104	0.548	0.256	4.60885e-07
GPBP1	3.14017e-11	0.295599	0.429	0.17	4.63333e-07
ADNP	3.17029e-11	0.366088	0.524	0.248	4.67776e-07
KRT6B	3.17067e-11	-0.783607	0.976	0.995	4.67832e-07
EHMT2	3.20703e-11	0.277015	0.429	0.166	4.73197e-07
PSMA3	3.27796e-11	0.285078	0.46	0.189	4.83663e-07
HDAC2	3.34288e-11	0.28442	0.437	0.174	4.93242e-07
ADGRL1	3.34317e-11	0.251811	0.294	0.091	4.93285e-07
ID3	3.34583e-11	0.391062	0.762	0.425	4.93678e-07
RNF25	3.37536e-11	0.257276	0.286	0.088	4.98034e-07
KDM2A	3.45997e-11	0.32561	0.738	0.393	5.10519e-07
ATP11A	3.46932e-11	0.29223	0.405	0.156	5.11899e-07
TRIM44	3.49224e-11	0.320217	0.437	0.181	5.1528e-07
CHERP	3.51609e-11	0.287146	0.373	0.137	5.188e-07
GSTP1	3.52019e-11	0.356225	1	0.975	5.19404e-07
SSH2	3.52592e-11	0.321986	0.46	0.196	5.20249e-07
USP5	3.53349e-11	0.295989	0.468	0.198	5.21366e-07
MPHOSPH10	3.59686e-11	0.290788	0.532	0.237	5.30716e-07
NEDD4L	3.61495e-11	0.262519	0.325	0.109	5.33386e-07
HR	3.63143e-11	0.334011	0.437	0.183	5.35817e-07
PSMB1	3.63646e-11	0.328466	0.746	0.402	5.3656e-07
PIP4K2B	3.68537e-11	0.280352	0.373	0.137	5.43777e-07
NENF	3.80076e-11	0.309837	0.373	0.138	5.60802e-07
INO80E	3.80741e-11	0.284998	0.413	0.159	5.61784e-07
ELOA	3.81373e-11	0.318682	0.437	0.182	5.62716e-07
ING4	3.82622e-11	0.260188	0.381	0.139	5.64559e-07
RAF1	3.84099e-11	0.295699	0.524	0.231	5.66738e-07
LIG3	3.89537e-11	0.256444	0.294	0.093	5.74762e-07
TAF1	3.95891e-11	0.336481	0.429	0.178	5.84137e-07
SH3YL1	3.99577e-11	0.336595	0.452	0.194	5.89576e-07
SGTA	4.12336e-11	0.320898	0.405	0.161	6.08402e-07
E4F1	4.15003e-11	0.317749	0.452	0.191	6.12337e-07
ANKRD17	4.22996e-11	0.357019	0.492	0.222	6.2413e-07
POLL	4.26825e-11	0.276209	0.341	0.119	6.29781e-07
CCNT2	4.28181e-11	0.292908	0.397	0.154	6.31781e-07
KARS	4.32342e-11	0.293393	0.429	0.173	6.37921e-07
ZNF32	4.3826e-11	0.266939	0.302	0.098	6.46652e-07
PAFAH1B2	4.38461e-11	0.310418	0.532	0.238	6.46949e-07
NUDCD3	4.47213e-11	0.316993	0.46	0.195	6.59863e-07
KRTDAP	4.52082e-11	-1.19272	0.706	0.859	6.67047e-07
NUFIP2	4.55999e-11	0.323073	0.452	0.191	6.72827e-07
ELK4	4.71707e-11	0.336306	0.413	0.166	6.96004e-07
SART3	4.7327e-11	0.261282	0.421	0.163	6.98309e-07
CAPRIN1	4.74602e-11	0.333825	0.627	0.308	7.00275e-07
2022-03-06	4.74906e-11	0.335995	0.627	0.315	7.00724e-07
DDX18	4.75488e-11	0.260353	0.325	0.109	7.01583e-07
ZNHIT6	4.79266e-11	0.284572	0.381	0.143	7.07156e-07
RAB3GAP2	4.83593e-11	0.278453	0.333	0.115	7.13542e-07
IFT172	4.8854e-11	0.257804	0.278	0.084	7.20841e-07
DCTN4	5.05416e-11	0.338298	0.516	0.235	7.45741e-07
TRMT112	5.06912e-11	0.346681	0.722	0.379	7.47949e-07
ZMYND19	5.07941e-11	0.274245	0.421	0.166	7.49466e-07
MSH5	5.11504e-11	0.260529	0.278	0.084	7.54723e-07
TAF1C	5.19993e-11	0.320261	0.492	0.215	7.6725e-07
CCDC97	5.3078e-11	0.290317	0.421	0.167	7.83166e-07
UBR3	5.34493e-11	0.286194	0.389	0.149	7.88645e-07
KLC1	5.38887e-11	0.360543	0.802	0.467	7.95127e-07
GALNS	5.51135e-11	0.309112	0.484	0.209	8.132e-07
CAMLG	5.5167e-11	0.329365	0.46	0.198	8.13989e-07
OGFOD3	5.59151e-11	0.282433	0.325	0.111	8.25028e-07
GUF1	5.61533e-11	0.255342	0.325	0.11	8.28541e-07
SLC37A4	5.62859e-11	0.271446	0.302	0.098	8.30499e-07
ANKS1A	5.69792e-11	0.274805	0.381	0.143	8.40728e-07
CBX3	5.73435e-11	0.278534	0.389	0.147	8.46103e-07
CHID1	5.78246e-11	0.278756	0.421	0.166	8.53202e-07
ELL2	5.81554e-11	0.375396	0.929	0.685	8.58083e-07
LMF2	5.82626e-11	0.340893	0.54	0.253	8.59665e-07
G3BP2	5.85554e-11	0.353649	0.659	0.338	8.63985e-07
WASHC4	5.94078e-11	0.303334	0.429	0.175	8.76562e-07
SF3B2	6.01979e-11	0.37346	0.635	0.331	8.8822e-07
ECPAS	6.09179e-11	0.35001	0.492	0.227	8.98843e-07
NR2C2	6.09197e-11	0.295468	0.373	0.138	8.98871e-07
GTPBP4	6.3344e-11	0.291508	0.444	0.183	9.34641e-07
EEF1D	6.38732e-11	0.336977	0.492	0.219	9.42449e-07
SRP72	6.41593e-11	0.252128	0.317	0.106	9.4667e-07
VPS4A	6.44485e-11	0.341048	0.579	0.28	9.50937e-07
TTC12	6.45769e-11	0.276028	0.278	0.086	9.52832e-07
SSU72	6.66988e-11	0.377504	0.635	0.346	9.8414e-07
ATF2	6.82219e-11	0.25712	0.365	0.132	1.00661e-06
GRHPR	6.9862e-11	0.305552	0.492	0.217	1.03081e-06
C11orf58	7.04145e-11	0.337583	0.659	0.35	1.03897e-06
MED25	7.13591e-11	0.338343	0.508	0.234	1.0529e-06
THBS3	7.17358e-11	0.270511	0.373	0.139	1.05846e-06
PDCD7	7.17592e-11	0.264235	0.302	0.099	1.05881e-06
MCM6	7.17688e-11	0.304582	0.317	0.108	1.05895e-06
GPX3	7.18925e-11	-0.918243	0.135	0.418	1.06077e-06
MSN	7.20543e-11	0.281849	0.508	0.218	1.06316e-06
ALKBH7	7.20962e-11	0.297565	0.413	0.166	1.06378e-06
AGAP9	7.21364e-11	0.345614	0.643	0.322	1.06437e-06
ERC1	7.28052e-11	0.318504	0.476	0.213	1.07424e-06
BIRC6	7.32297e-11	0.272637	0.381	0.144	1.0805e-06
RRP1	7.3902e-11	0.287215	0.437	0.179	1.09042e-06
INAFM1	7.46138e-11	0.324604	0.532	0.247	1.10093e-06
MON1B	7.55116e-11	0.272269	0.357	0.131	1.11417e-06
[truncated: 937 more rows]

## Sheet: A1 - region 4
	p_val	avg_log2FC	pct.1	pct.2	p_val_adj
COL1A2	3.55399e-45	1.59189	1	0.981	5.24392e-41
COL1A1	8.63529e-45	1.59542	1	0.912	1.27414e-40
SPARC	5.15602e-43	1.50262	1	0.73	7.6077e-39
COL3A1	2.70514e-35	1.18907	1	0.92	3.99144e-31
AEBP1	1.38262e-24	0.932176	0.876	0.477	2.04005e-20
KRT16	7.1853e-24	0.642559	1	1	1.06019e-19
UBC	7.91503e-23	-0.68485	1	1	1.16786e-18
COL6A1	5.16626e-21	0.887246	0.956	0.64	7.62281e-17
PCOLCE	3.30793e-18	0.742757	0.894	0.527	4.88085e-14
COL11A1	9.0353e-17	0.655622	0.593	0.252	1.33316e-12
COL6A2	4.39318e-16	0.685945	0.947	0.622	6.48213e-12
THBS2	4.94056e-16	0.728937	0.726	0.372	7.2898e-12
MMP2	5.87568e-14	0.583806	0.761	0.428	8.66956e-10
COL16A1	7.01134e-14	0.701294	0.708	0.442	1.03452e-09
DCN	2.04143e-13	0.637161	1	0.732	3.01213e-09
SH3BGRL3	3.41312e-13	-0.6177	0.257	0.674	5.03605e-09
AP2S1	4.50795e-12	-0.511579	0.221	0.627	6.65148e-08
NECTIN4	1.67132e-11	-0.627647	0.195	0.551	2.46604e-07
HTRA1	6.52887e-11	0.608789	0.593	0.345	9.63335e-07
COL6A3	6.78182e-11	0.539443	0.743	0.45	1.00066e-06
C6orf132	1.27016e-10	-0.567212	0.354	0.711	1.87413e-06
COL14A1	2.01813e-10	0.536546	0.619	0.352	2.97775e-06
FBLN1	2.56219e-10	0.586551	0.761	0.519	3.78052e-06
ASPN	2.86141e-10	0.527821	0.363	0.146	4.22202e-06
FN1	5.40075e-10	0.610938	0.69	0.444	7.96881e-06
ARF1	6.86748e-10	-0.463204	0.416	0.764	1.0133e-05
TNS4	1.1053e-09	-0.631678	0.177	0.483	1.63086e-05
MAL2	1.68274e-09	-0.555291	0.212	0.545	2.48289e-05
IGFBP4	1.71573e-09	0.545669	0.832	0.607	2.53156e-05
PTGDS	1.79355e-09	0.566749	0.832	0.563	2.64639e-05
CREB3L1	2.81961e-09	0.417866	0.372	0.156	4.16033e-05
TENT5B	4.62629e-09	-0.436509	0.106	0.396	6.82609e-05
ATP11B	5.25835e-09	-0.386331	0.142	0.453	7.75869e-05
ST14	1.24199e-08	-0.397007	0.097	0.378	0.000183256
MX1	1.26075e-08	-0.451968	0.168	0.481	0.000186024
SYNGR2	1.29849e-08	-0.378254	0.097	0.391	0.000191592
PGAM1	1.31715e-08	-0.354646	0.053	0.317	0.000194345
LRATD1	1.66093e-08	-0.452365	0.115	0.4	0.00024507
RREB1	1.88768e-08	-0.369653	0.124	0.409	0.000278527
MGLL	1.90708e-08	-0.373653	0.097	0.374	0.00028139
MTPN	3.35867e-08	-0.475042	0.142	0.438	0.000495572
TINF2	3.39947e-08	-0.328519	0.018	0.246	0.000501592
CRYAB	3.7078e-08	-0.604007	0.248	0.538	0.000547086
JUP	3.86278e-08	-0.442058	0.973	0.981	0.000569953
RANGAP1	3.88505e-08	-0.371414	0.124	0.412	0.00057324
PNKP	4.51126e-08	-0.334297	0.018	0.243	0.000665637
GATAD2A	5.07461e-08	-0.371885	0.124	0.395	0.000748759
RAB13	5.3735e-08	-0.340604	0.097	0.377	0.000792859
ILRUN	5.5321e-08	-0.332827	0.088	0.355	0.000816261
VDAC1	6.43713e-08	-0.353399	0.097	0.362	0.000949799
BLCAP	6.5118e-08	-0.388307	0.097	0.372	0.000960816
IL1RN	6.70533e-08	-0.841005	0.912	0.894	0.000989371
TPPP3	6.85648e-08	-0.574854	0.142	0.409	0.00101167
EHBP1L1	8.34071e-08	-0.396449	0.354	0.682	0.00123067
RIOK3	8.85398e-08	-0.338575	0.062	0.308	0.0013064
BTG2	9.51931e-08	-0.430079	0.177	0.473	0.00140457
NBL1	1.05948e-07	0.556898	0.628	0.48	0.00156327
ARGLU1	1.06315e-07	0.348267	0.947	0.798	0.00156868
ZBTB7B	1.09515e-07	-0.410081	0.195	0.498	0.00161589
YPEL3	1.15627e-07	-0.452607	0.204	0.489	0.00170607
PRRX1	1.22083e-07	0.50121	0.637	0.443	0.00180133
MARCKS	1.22553e-07	0.392248	0.947	0.862	0.00180826
IGSF3	1.24823e-07	-0.378116	0.088	0.346	0.00184176
NSG1	1.25707e-07	-0.480782	0.177	0.45	0.00185481
LGALS1	1.37854e-07	0.4484	0.602	0.386	0.00203403
MDH2	1.39519e-07	-0.333231	0.097	0.358	0.0020586
TRIM28	1.4253e-07	-0.371608	0.159	0.451	0.00210303
RHBDF2	1.44699e-07	-0.348089	0.027	0.243	0.00213504
PKP4	1.50474e-07	-0.331493	0.071	0.32	0.00222024
RAC1	1.53801e-07	-0.358686	0.425	0.739	0.00226933
COL12A1	1.54245e-07	0.459295	0.531	0.321	0.00227588
CYP26B1	1.57459e-07	0.546143	0.46	0.266	0.0023233
GNA15	1.63009e-07	-0.3079	0.018	0.232	0.0024052
CAMSAP3	1.91435e-07	-0.350352	0.053	0.289	0.00282462
SCEL	1.92127e-07	-0.769411	0.274	0.539	0.00283484
KIF5B	1.99102e-07	-0.367205	0.177	0.467	0.00293775
EEF2K	2.04015e-07	-0.396378	0.097	0.342	0.00301025
FAT2	2.15438e-07	-0.393983	0.168	0.449	0.00317879
SRSF2	2.16342e-07	-0.377545	0.425	0.712	0.00319212
MICALL1	2.19679e-07	-0.36856	0.133	0.396	0.00324136
NFKBIA	2.23112e-07	-0.380887	0.195	0.494	0.00329202
MAP7D1	2.28636e-07	-0.389255	0.195	0.487	0.00337353
CRISPLD2	2.30259e-07	0.453829	0.478	0.266	0.00339748
DDX5	2.44671e-07	0.360461	0.991	0.92	0.00361012
TIMP2	2.52993e-07	0.378749	0.69	0.48	0.00373291
CTSK	2.76906e-07	0.476653	0.575	0.378	0.00408574
IRF9	2.80739e-07	-0.363047	0.15	0.436	0.00414231
P2RY1	2.92294e-07	-0.356634	0.071	0.307	0.0043128
PTPA	2.94979e-07	-0.324084	0.106	0.357	0.00435241
TMEM109	3.25378e-07	-0.335935	0.097	0.341	0.00480095
DUSP7	3.72695e-07	-0.360035	0.133	0.388	0.00549912
C19orf53	4.00234e-07	-0.283787	0.062	0.295	0.00590545
TMBIM1	4.05899e-07	-0.391186	0.186	0.473	0.00598904
TMEM79	4.2895e-07	-0.375743	0.115	0.348	0.00632916
ZNF185	4.31782e-07	-0.42575	0.274	0.582	0.00637094
WDR26	4.36641e-07	-0.347579	0.124	0.399	0.00644264
IRF6	4.50102e-07	-0.369095	0.168	0.433	0.00664125
STARD10	4.60417e-07	-0.300581	0.062	0.296	0.00679346
IL13RA1	4.64723e-07	-0.316913	0.071	0.297	0.00685699
YME1L1	4.98044e-07	-0.297126	0.088	0.327	0.00734863
CCNI	5.06358e-07	-0.361927	0.204	0.492	0.00747131
EIF3K	5.49928e-07	-0.343962	0.159	0.423	0.00811418
CEBPD	5.53828e-07	-0.3868	0.248	0.546	0.00817173
FXYD3	5.73902e-07	-0.423011	0.274	0.559	0.00846792
GM2A	5.99986e-07	-0.547389	0.23	0.519	0.00885279
KDSR	6.03755e-07	-0.323673	0.088	0.329	0.0089084
ARHGEF4	6.08255e-07	-0.426549	0.292	0.576	0.0089748
C19orf48	6.64985e-07	-0.29368	0.027	0.232	0.00981185
TLCD3A	6.7528e-07	-0.340878	0.071	0.297	0.00996375
NAA50	6.8152e-07	-0.284764	0.106	0.359	0.0100558
MAPRE1	6.93264e-07	-0.30259	0.106	0.354	0.0102291
KRT3	7.04368e-07	-0.835311	0.345	0.612	0.0103929
LRRFIP2	7.49936e-07	-0.305213	0.053	0.266	0.0110653
LMO4	7.56171e-07	-0.491335	0.292	0.559	0.0111573
ATP5MG	7.77288e-07	-0.325609	0.15	0.409	0.0114689
DHCR24	7.83763e-07	-0.380183	0.204	0.493	0.0115644
SLURP1	7.86342e-07	-0.801395	0.115	0.345	0.0116025
C1R	8.1571e-07	0.277183	0.841	0.543	0.0120358
FLII	8.98432e-07	-0.324372	0.23	0.524	0.0132564
SPTAN1	9.03536e-07	-0.300427	0.15	0.432	0.0133317
ZNRF1	9.11545e-07	-0.28998	0.053	0.267	0.0134498
ACAA1	9.2507e-07	-0.300176	0.08	0.305	0.0136494
PLCH2	9.60052e-07	-0.346461	0.106	0.352	0.0141656
HSPB8	9.66916e-07	-0.430205	0.071	0.283	0.0142668
PPDPF	9.99289e-07	-0.339979	0.929	0.947	0.0147445
ITGB4	1.00646e-06	-0.453782	0.159	0.41	0.0148503
ADAR	1.0232e-06	-0.31942	0.168	0.448	0.0150973
JARID2	1.04087e-06	-0.316669	0.097	0.333	0.015358
MPP7	1.05576e-06	-0.3043	0.115	0.366	0.0155778
H2AFY	1.09687e-06	-0.28705	0.142	0.418	0.0161843
CCT5	1.10014e-06	-0.343586	0.133	0.378	0.0162326
DIP2B	1.10223e-06	-0.297134	0.062	0.279	0.0162633
SYTL1	1.15522e-06	-0.397061	0.23	0.501	0.0170452
BCAP31	1.21468e-06	-0.326225	0.186	0.455	0.0179227
VDAC2	1.22985e-06	-0.303653	0.133	0.386	0.0181465
CCT2	1.23572e-06	-0.304884	0.08	0.301	0.0182331
HADHA	1.27529e-06	-0.305614	0.097	0.335	0.0188169
RHOD	1.32925e-06	-0.390492	0.159	0.413	0.019613
SEPTIN10	1.38898e-06	-0.276979	0.097	0.332	0.0204943
SHISA5	1.49998e-06	-0.324677	0.106	0.348	0.0221322
RBM39	1.56658e-06	-0.287616	0.124	0.381	0.0231148
S100A4	1.62491e-06	0.407207	0.796	0.59	0.0239755
WDR45B	1.63728e-06	-0.273694	0.088	0.32	0.024158
AMD1	1.66661e-06	-0.276979	0.053	0.259	0.0245908
FRMD4B	1.73652e-06	-0.324559	0.035	0.23	0.0256223
SCD	1.74228e-06	-0.395052	0.097	0.32	0.0257073
CIB1	1.74594e-06	-0.272896	0.035	0.234	0.0257614
KLK11	1.75681e-06	-0.546903	0.504	0.698	0.0259218
ARL4D	1.83669e-06	-0.273694	0.08	0.31	0.0271004
CLIC1	1.90217e-06	-0.33932	0.301	0.596	0.0280664
FDFT1	1.94452e-06	-0.276574	0.062	0.273	0.0286914
COL5A1	1.96e-06	0.436877	0.531	0.357	0.0289197
CORO1B	1.9875e-06	-0.268322	0.062	0.276	0.0293255
TMPRSS11A	2.04564e-06	-0.378543	0.115	0.33	0.0301834
MICOS10	2.05182e-06	-0.312954	0.124	0.36	0.0302746
ZFP36L1	2.08113e-06	-0.343692	0.982	0.951	0.030707
ACTN4	2.11101e-06	-0.330702	0.257	0.556	0.0311479
CCN1	2.11378e-06	0.443564	0.496	0.318	0.0311888
N4BP1	2.13797e-06	-0.289937	0.115	0.352	0.0315457
PTTG1IP	2.26651e-06	-0.322043	0.106	0.331	0.0334423
TAP1	2.30916e-06	-0.302734	0.08	0.295	0.0340717
DLX5	2.34649e-06	-0.309253	0.071	0.278	0.0346224
SRSF4	2.3487e-06	-0.282729	0.115	0.351	0.034655
ZDHHC5	2.37429e-06	-0.2975	0.142	0.391	0.0350327
ZFP36	2.42266e-06	-0.403846	0.487	0.734	0.0357464
COX6B1	2.44691e-06	-0.318558	0.257	0.552	0.0361041
PITX1	2.47289e-06	-0.432694	0.611	0.77	0.0364876
GDI2	2.53573e-06	-0.277421	0.142	0.392	0.0374148
LAMB3	2.88825e-06	-0.566056	0.168	0.397	0.0426162
SGPL1	2.94031e-06	-0.279122	0.035	0.222	0.0433843
CELSR2	3.0838e-06	-0.34338	0.133	0.352	0.0455014
STXBP5	3.12375e-06	-0.287334	0.124	0.354	0.0460909
SH3RF2	3.13198e-06	-0.391788	0.212	0.465	0.0462124
CUL3	3.18384e-06	-0.301262	0.088	0.297	0.0469775
OGN	3.22702e-06	0.295814	0.327	0.155	0.0476147
MYL12B	3.24759e-06	-0.286462	0.159	0.422	0.0479181
PIM3	3.24963e-06	-0.275805	0.142	0.386	0.0479484
CPNE1	3.27941e-06	-0.307283	0.133	0.364	0.0483877
MFN2	3.29546e-06	-0.263786	0.08	0.299	0.0486245
PSMB4	3.42955e-06	-0.294499	0.195	0.467	0.050603
NFAT5	3.53989e-06	-0.314489	0.133	0.366	0.0522311
CCDC88C	3.59162e-06	-0.291935	0.08	0.29	0.0529943
LMNA	3.61537e-06	0.333991	0.991	0.921	0.0533447
MPST	3.69687e-06	-0.305629	0.133	0.369	0.0545473
RASAL1	3.73602e-06	-0.377646	0.044	0.232	0.0551249
BGN	3.79515e-06	0.426761	0.575	0.387	0.0559975
RBM25	3.88389e-06	-0.340886	0.159	0.391	0.0573069
ERC1	3.91606e-06	-0.262423	0.062	0.265	0.0577814
CLDN1	3.98648e-06	-0.491235	0.168	0.403	0.0588206
TBCB	3.99245e-06	-0.281055	0.088	0.298	0.0589086
MKNK2	4.07118e-06	-0.351039	0.363	0.645	0.0600702
ARF5	4.17211e-06	-0.292075	0.08	0.283	0.0615595
RAB11A	4.20128e-06	-0.375267	0.239	0.505	0.0619898
TMEM123	4.23819e-06	-0.291669	0.097	0.317	0.0625345
LRBA	4.3597e-06	-0.279191	0.053	0.242	0.0643274
PSMD9	4.46526e-06	-0.252445	0.018	0.19	0.0658849
TALDO1	4.55046e-06	-0.305451	0.274	0.572	0.067142
DMKN	4.69037e-06	-0.669055	0.274	0.501	0.0692064
RAPGEFL1	4.7192e-06	-0.326463	0.212	0.473	0.0696319
SUMO3	4.79335e-06	-0.29127	0.159	0.4	0.0707258
BAG3	4.80363e-06	-0.271486	0.124	0.353	0.0708776
LMNB2	4.81732e-06	-0.321143	0.08	0.287	0.0710796
NFE2L2	4.83651e-06	-0.448042	0.451	0.686	0.0713627
PHLDA1	4.93795e-06	-0.422822	0.053	0.241	0.0728594
EPS8L2	4.96888e-06	-0.358987	0.434	0.706	0.0733159
SESN3	5.09723e-06	-0.324907	0.115	0.328	0.0752096
NPEPPS	5.1171e-06	-0.35318	0.159	0.386	0.0755028
DYNLT3	5.22593e-06	-0.277163	0.124	0.351	0.0771086
MMP14	5.25618e-06	0.435934	0.575	0.434	0.0775549
CD24	5.33327e-06	-0.466423	0.336	0.598	0.0786924
NET1	5.47948e-06	-0.318446	0.133	0.35	0.0808498
MOV10	5.50634e-06	-0.28702	0.088	0.296	0.081246
SFT2D2	5.64712e-06	-0.296289	0.097	0.313	0.0833233
ARPC1A	5.90393e-06	-0.260154	0.097	0.309	0.0871125
PSMB6	5.98574e-06	-0.263998	0.115	0.336	0.0883196
SLC38A2	6.24343e-06	-0.359341	0.221	0.473	0.0921219
FAM83H	6.28237e-06	-0.336561	0.265	0.518	0.0926964
UTP3	6.32932e-06	-0.251874	0.062	0.262	0.0933891
CTSC	6.52956e-06	-0.308156	0.062	0.255	0.0963436
FAM110C	6.83215e-06	-0.354291	0.115	0.327	0.100808
AKR1B10	7.26231e-06	-0.44145	0.221	0.453	0.107155
TTC22	7.44571e-06	-0.277861	0.097	0.305	0.109861
SERPINB1	7.57588e-06	-0.502456	0.08	0.282	0.111782
DHCR7	8.02949e-06	-0.309335	0.053	0.236	0.118475
KRT5	8.06816e-06	0.251847	1	0.995	0.119046
PIAS3	8.07578e-06	-0.280112	0.115	0.331	0.119158
LETM1	8.15661e-06	-0.306679	0.088	0.284	0.120351
FAM89A	8.17849e-06	-0.261718	0.044	0.225	0.120674
NBEAL2	8.42053e-06	-0.342224	0.274	0.55	0.124245
HES4	8.85481e-06	-0.318687	0.115	0.327	0.130653
HARS	8.96624e-06	-0.26458	0.08	0.28	0.132297
ID3	9.03201e-06	-0.391877	0.248	0.489	0.133267
FAM83B	9.15208e-06	-0.301687	0.15	0.394	0.135039
ADGRG1	9.3608e-06	-0.27851	0.115	0.323	0.138119
CCT8	9.50117e-06	-0.254238	0.115	0.337	0.14019
EIF6	9.70493e-06	-0.291898	0.257	0.522	0.143196
R3HDM4	9.76074e-06	-0.259444	0.106	0.316	0.14402
AUTS2	9.92803e-06	-0.279362	0.142	0.375	0.146488
ATP5F1A	1.00634e-05	-0.265433	0.106	0.318	0.148485
RCC2	1.03086e-05	-0.265204	0.142	0.367	0.152103
LAMP2	1.03316e-05	-0.278711	0.177	0.44	0.152443
YARS	1.04266e-05	-0.255146	0.053	0.237	0.153845
COX8A	1.04876e-05	-0.314507	0.239	0.502	0.154745
EIF2B5	1.0719e-05	-0.263398	0.097	0.304	0.158158
TNFRSF19	1.07225e-05	-0.306305	0.088	0.294	0.158211
NEBL	1.10289e-05	-0.261575	0.097	0.309	0.162732
XRCC5	1.13009e-05	-0.308557	0.212	0.461	0.166745
TMEM40	1.14351e-05	-0.401882	0.15	0.362	0.168725
SUSD6	1.16083e-05	-0.252689	0.071	0.266	0.17128
CLIC3	1.16743e-05	-0.684562	0.186	0.391	0.172255
NCOA4	1.19113e-05	-0.260154	0.106	0.313	0.175752
COX5A	1.23726e-05	-0.283238	0.301	0.589	0.182558
TMEM134	1.24055e-05	-0.311252	0.212	0.461	0.183043
MVP	1.24431e-05	-0.272011	0.088	0.289	0.183598
ZBTB7C	1.24543e-05	-0.268873	0.177	0.413	0.183763
PPP1CA	1.27138e-05	-0.260154	0.177	0.423	0.187592
TNIP1	1.2849e-05	-0.29777	0.088	0.284	0.189586
IK	1.33857e-05	-0.265701	0.106	0.32	0.197505
TSC22D2	1.34832e-05	-0.298047	0.053	0.23	0.198944
BHLHE40	1.3869e-05	-0.395692	0.274	0.512	0.204636
VPS9D1	1.39573e-05	-0.258246	0.062	0.245	0.20594
BRK1	1.40197e-05	-0.251581	0.186	0.429	0.206861
ZNF385A	1.40715e-05	-0.30623	0.23	0.486	0.207624
BNC1	1.45701e-05	-0.258652	0.062	0.247	0.214981
SLC16A9	1.47703e-05	-0.308588	0.133	0.345	0.217936
LPIN3	1.4899e-05	-0.277861	0.097	0.294	0.219835
DVL1	1.51647e-05	-0.25813	0.142	0.365	0.223755
HK1	1.5263e-05	-0.29058	0.257	0.513	0.225205
PRKDC	1.52783e-05	-0.259779	0.071	0.258	0.225432
CYSRT1	1.54631e-05	-0.456023	0.08	0.269	0.228158
PERP	1.57173e-05	-0.353582	1	0.982	0.231909
PGLYRP3	1.58629e-05	-0.373026	0.106	0.304	0.234057
SS18	1.62422e-05	-0.26988	0.071	0.254	0.239653
EVL	1.7915e-05	-0.27689	0.15	0.369	0.264335
MIDN	1.81844e-05	-0.269621	0.186	0.417	0.268311
PSMB8	1.8392e-05	-0.254804	0.053	0.232	0.271374
FOXK2	1.87741e-05	-0.258335	0.088	0.284	0.277012
ACACA	1.89242e-05	-0.252187	0.071	0.253	0.279227
CAPG	1.90122e-05	-0.26411	0.31	0.591	0.280524
EEF1B2	1.90696e-05	-0.299436	0.31	0.59	0.281373
SULT2B1	1.92506e-05	-0.510629	0.186	0.388	0.284043
WDR83OS	1.94769e-05	-0.260154	0.15	0.371	0.287381
HSBP1	1.98389e-05	-0.254167	0.159	0.4	0.292723
NQO1	1.99554e-05	-0.251354	0.053	0.231	0.294441
GPCPD1	2.01502e-05	-0.289219	0.186	0.425	0.297316
TLN1	2.04958e-05	-0.254368	0.124	0.332	0.302416
BAMBI	2.10242e-05	-0.307114	0.027	0.186	0.310212
ECPAS	2.19768e-05	-0.257937	0.088	0.277	0.324268
ANP32B	2.24149e-05	-0.266835	0.142	0.357	0.330732
CSNK2B	2.24204e-05	-0.250463	0.204	0.466	0.330814
LITAF	2.24742e-05	-0.26596	0.088	0.281	0.331606
PABPC4	2.28526e-05	-0.286551	0.168	0.391	0.337191
MAPKAPK3	2.31944e-05	-0.257173	0.08	0.265	0.342234
BDH1	2.36678e-05	-0.315072	0.159	0.373	0.349218
HLA-DPB1	2.45891e-05	-0.478655	0.097	0.285	0.362812
VIM	2.48303e-05	0.251217	0.991	0.714	0.366371
MINK1	2.50955e-05	-0.280819	0.363	0.637	0.370284
EIF2S3	2.53995e-05	-0.271525	0.23	0.469	0.37477
UBE2B	2.73643e-05	-0.264662	0.124	0.325	0.40376
COX6A1	2.75379e-05	-0.31364	0.389	0.659	0.406322
DYNLL1	2.83187e-05	-0.29522	0.283	0.554	0.417843
STAT6	2.87305e-05	-0.292669	0.239	0.505	0.423918
FBN1	2.90572e-05	0.345946	0.655	0.48	0.428739
MAP3K11	2.9695e-05	-0.259788	0.097	0.284	0.438149
CSNK1E	2.99683e-05	-0.261943	0.106	0.297	0.442183
C1orf116	3.04629e-05	-0.424594	0.124	0.322	0.44948
CTNNB1	3.06434e-05	-0.257243	0.221	0.469	0.452143
FAM53B	3.12591e-05	-0.253032	0.106	0.303	0.461228
CTSA	3.19598e-05	-0.316226	0.142	0.35	0.471567
BST2	3.21339e-05	-0.442563	0.177	0.379	0.474135
LRP10	3.29549e-05	-0.294045	0.354	0.637	0.48625
RMND5A	3.30989e-05	-0.294875	0.15	0.374	0.488374
TRIP10	3.3856e-05	-0.290747	0.159	0.379	0.499545
MRC2	3.40274e-05	0.397028	0.549	0.434	0.502075
CAPNS1	3.47423e-05	-0.297054	0.327	0.606	0.512622
PLA2G4B	3.80916e-05	-0.263475	0.133	0.343	0.562041
JPT1	3.97657e-05	-0.293553	0.186	0.4	0.586743
CTSB	4.03038e-05	-0.291051	0.496	0.764	0.594682
UBE2H	4.04591e-05	-0.261085	0.186	0.412	0.596974
EEF1G	4.12638e-05	-0.322994	0.947	0.925	0.608848
POSTN	4.26608e-05	0.403622	0.549	0.394	0.62946
CLTC	4.34919e-05	-0.256296	0.221	0.473	0.641723
SLC9A3	4.3615e-05	-0.299551	0.115	0.304	0.64354
LY6D	4.37953e-05	-0.452771	0.947	0.889	0.646199
CSK	4.44454e-05	-0.264937	0.133	0.334	0.655793
RAB25	4.45832e-05	-0.326159	0.23	0.457	0.657825
CAV1	4.53333e-05	-0.26406	0.044	0.202	0.668893
MAPK3	4.55279e-05	-0.292212	0.177	0.385	0.671764
ATF3	4.58923e-05	-0.310459	0.097	0.283	0.67714
APLP2	4.64169e-05	-0.289237	0.221	0.468	0.684881
CPEB4	4.6493e-05	-0.276352	0.062	0.224	0.686004
MAZ	4.66024e-05	-0.339112	0.248	0.477	0.687618
ERBB3	4.66798e-05	-0.277791	0.159	0.362	0.688761
PLP2	4.9313e-05	-0.322766	0.265	0.502	0.727613
FAM83A	4.9402e-05	-0.347042	0.044	0.2	0.728927
GLUL	4.9566e-05	-0.7708	0.673	0.764	0.731346
TMOD3	4.95904e-05	-0.277404	0.274	0.535	0.731706
COX6C	4.96579e-05	-0.285397	0.239	0.47	0.732702
EPHX3	5.04632e-05	-0.270796	0.044	0.205	0.744584
UQCRQ	5.34072e-05	-0.257296	0.239	0.485	0.788023
TRIM29	5.36567e-05	-0.295218	1	0.995	0.791705
DAZAP1	5.4298e-05	-0.262053	0.195	0.413	0.801167
QSOX1	5.59034e-05	-0.478223	0.23	0.432	0.824854
EPHA2	5.67119e-05	-0.33648	0.186	0.408	0.836783
TJP1	5.8178e-05	-0.284621	0.159	0.381	0.858416
CLDN4	5.90901e-05	-0.482786	0.142	0.328	0.871875
C19orf33	6.01862e-05	-0.334839	0.487	0.699	0.888048
TSPO	6.09187e-05	-0.328326	0.637	0.776	0.898855
NCCRP1	6.24175e-05	-0.803609	0.195	0.373	0.92097
PRXL2A	6.30734e-05	-0.303953	0.133	0.319	0.930648
PTPRF	6.33791e-05	-0.316226	0.257	0.488	0.935158
COL5A2	6.3881e-05	0.350565	0.425	0.273	0.942564
ABCC1	6.47255e-05	-0.264285	0.133	0.325	0.955025
TPRG1	6.49417e-05	-0.301639	0.018	0.155	0.958214
RBM5	6.49875e-05	-0.251581	0.168	0.389	0.958891
GPX3	6.53161e-05	-0.610652	0.212	0.405	0.963739
RNASE1	6.53381e-05	-0.25383	0.035	0.185	0.964064
AHDC1	6.55481e-05	-0.269949	0.239	0.475	0.967163
RALY	6.62824e-05	-0.272669	0.15	0.345	0.977996
SAT1	6.63682e-05	-0.359474	0.398	0.652	0.979263
DNASE1L3	6.71515e-05	-0.322374	0.168	0.359	0.99082
SEC11C	7.38435e-05	-0.25666	0.053	0.208	1
EXT1	7.45042e-05	-0.319048	0.177	0.374	1
RSL1D1	7.65616e-05	-0.27952	0.177	0.386	1
NRARP	7.75902e-05	-0.270952	0.142	0.351	1
GPX4	7.9267e-05	-0.310306	0.301	0.527	1
PLPP3	7.96846e-05	0.337441	0.487	0.323	1
OPTN	8.19332e-05	-0.251987	0.239	0.48	1
RNF225	8.20141e-05	-0.545727	0.071	0.234	1
EFHD2	8.33509e-05	-0.253936	0.133	0.317	1
FGFR3	8.43368e-05	-0.345425	0.239	0.447	1
AHNAK2	8.57115e-05	-0.299467	0.301	0.542	1
RND3	9.00024e-05	-0.251566	0.08	0.246	1
LMO7	9.11718e-05	-0.524739	0.186	0.374	1
GSTO1	9.17126e-05	-0.263015	0.106	0.282	1
CCND2	9.56467e-05	-0.320686	0.115	0.297	1
SOX21	9.78027e-05	-0.299456	0.15	0.339	1
UBE2R2	9.80855e-05	-0.258754	0.124	0.307	1
CAPNS2	9.8129e-05	-0.271375	0.204	0.424	1
ETS2	0.000101174	-0.261758	0.265	0.507	1
PSAP	0.000104581	0.300924	0.965	0.943	1
AQP3	0.000107036	-0.396775	1	0.957	1
TNFRSF21	0.000110133	-0.304722	0.159	0.36	1
LGMN	0.000110331	-0.253794	0.124	0.303	1
BTG3	0.000111651	-0.276264	0.212	0.43	1
KRT76	0.000111779	-1.25857	1	1	1
ELOVL1	0.000113516	-0.267775	0.124	0.304	1
TLE5	0.000116323	-0.318643	0.504	0.716	1
FSTL1	0.000123588	0.306228	0.575	0.43	1
CDC42EP1	0.000124654	-0.254611	0.177	0.371	1
ATP5F1D	0.000128363	-0.272065	0.274	0.522	1
CPEB2	0.000130685	-0.2876	0.257	0.496	1
SLC9A3R1	0.00013235	-0.353423	0.69	0.774	1
EZR	0.000134564	-0.276241	0.319	0.562	1
MT1E	0.000135925	-0.287936	0.168	0.366	1
TNFRSF25	0.000136651	-0.267835	0.15	0.338	1
DYNAP	0.000138236	-0.25975	0.018	0.146	1
MT2A	0.000140582	-0.314215	0.177	0.378	1
OAZ1	0.000146839	-0.268877	0.628	0.811	1
HLA-C	0.000146873	-0.333777	0.31	0.536	1
VSNL1	0.000152646	-0.269231	0.142	0.323	1
SPINT1	0.000161743	-0.275227	0.257	0.49	1
TM4SF1	0.000164543	-0.385685	0.159	0.344	1
CPXM2	0.000164878	0.296796	0.292	0.161	1
CHTOP	0.000166654	-0.251421	0.23	0.442	1
FKBP10	0.00016937	0.332076	0.407	0.262	1
MALL	0.000169707	-0.31532	0.159	0.347	1
FMO2	0.000180755	-0.449888	0.08	0.232	1
WFDC5	0.000187817	-0.460776	0.053	0.193	1
HS3ST6	0.000192816	-0.277275	0.088	0.246	1
KCTD12	0.000210505	-0.340382	0.124	0.286	1
CD74	0.000212395	-0.677147	0.389	0.574	1
RORA	0.000214365	-0.261636	0.212	0.415	1
COMT	0.000222016	-0.271063	0.274	0.483	1
CXCR4	0.000242537	-0.262889	0.027	0.157	1
MAFB	0.000251262	-0.288819	0.292	0.504	1
IDE	0.000251802	-0.282661	0.044	0.179	1
HIST1H4D	0.000255103	-0.303361	0.142	0.313	1
HSP90AB1	0.000257543	-0.268816	0.469	0.698	1
ELOVL4	0.000265926	-0.454188	0.133	0.288	1
FAM83C	0.000271955	-0.266634	0.106	0.263	1
IGHG1	0.000272238	-0.790697	0.938	0.621	1
LARGE2	0.000274279	-0.256149	0.097	0.253	1
SGK1	0.000275663	-0.33902	0.593	0.749	1
PRSS8	0.00028277	-0.282721	0.115	0.279	1
SH3BGRL2	0.000283176	-0.279799	0.044	0.178	1
CYBA	0.000293557	-0.393724	0.159	0.325	1
PPP1R3C	0.000299077	-0.317185	0.133	0.308	1
ACAP3	0.000312378	-0.292307	0.434	0.651	1
TWIST2	0.00032375	0.33686	0.372	0.241	1
SPNS2	0.000329045	-0.54451	0.115	0.264	1
ATP2A2	0.000331215	-0.253919	0.345	0.584	1
F3	0.000338627	-0.413299	0.212	0.405	1
CDA	0.00034518	-0.365325	0.071	0.206	1
VCAN	0.000370808	0.289411	0.522	0.353	1
KTN1	0.00037156	-0.260695	0.274	0.48	1
HNRNPUL2	0.000377013	-0.251987	0.363	0.596	1
ARHGDIB	0.00040009	-0.272011	0.097	0.25	1
EYA1	0.000407138	0.267561	0.23	0.121	1
NIBAN2	0.000413559	-0.388661	0.699	0.801	1
LDB1	0.000429053	-0.274049	0.301	0.519	1
CERCAM	0.000432451	0.289097	0.416	0.276	1
SCNN1A	0.000486536	-0.280014	0.097	0.243	1
SNRNP70	0.000500188	0.304665	0.894	0.77	1
MAP1B	0.000515809	0.273609	0.425	0.289	1
IL36A	0.000518206	-0.598122	0.088	0.231	1
CHMP4C	0.00053116	-0.282688	0.08	0.218	1
NDRG1	0.000575372	-0.274424	0.301	0.511	1
LAMA5	0.000585899	-0.291366	0.301	0.493	1
AHNAK	0.000597746	-0.260629	0.965	0.991	1
HIST1H4A	0.000598275	-0.250202	0.071	0.202	1
MAP1LC3A	0.000598663	-0.386022	0.15	0.303	1
ENDOU	0.000643562	-0.303244	0.115	0.264	1
TREX2	0.000660146	-0.397371	0.044	0.163	1
SLURP2	0.000703757	-0.570916	0.239	0.395	1
CRYBG1	0.000716564	-0.298217	0.177	0.35	1
IFITM2	0.00075263	-0.343263	0.372	0.552	1
SET	0.000758646	-0.250255	0.416	0.643	1
CDHR1	0.000803326	-0.313951	0.142	0.287	1
PRSS27	0.000838731	-0.627632	0.159	0.307	1
ATG9B	0.00090891	-0.32411	0.018	0.121	1
CEACAM5	0.000941472	-0.313635	0.053	0.175	1
HSPA1A	0.0010057	-0.263526	0.354	0.561	1
IER3	0.00100762	-0.254287	0.186	0.368	1
KLK12	0.00102974	-0.675972	0.212	0.349	1
TXNIP	0.00103414	-0.287811	0.31	0.519	1
EHF	0.0010436	-0.271101	0.46	0.659	1
PRDM1	0.00108634	-0.350352	0.115	0.257	1
MBOAT2	0.00109724	-0.270299	0.097	0.23	1
ANXA11	0.00111317	-0.254287	0.204	0.372	1
RNF187	0.00113229	-0.251063	0.381	0.571	1
HIST1H3D	0.00114516	-0.263015	0.106	0.243	1
SORT1	0.00116997	-0.265045	0.133	0.273	1
POF1B	0.00122381	-0.453019	0.195	0.358	1
KLK6	0.00124388	-0.492676	0.062	0.178	1
C15orf48	0.00124625	-0.600428	0.071	0.189	1
LYPD2	0.00124975	-0.266398	0.027	0.132	1
DBI	0.00126602	-0.292492	0.841	0.825	1
MZB1	0.00131087	-0.356584	0.08	0.203	1
FUT6	0.00139896	-0.325041	0.018	0.114	1
CLEC3B	0.00142497	-0.258335	0.097	0.228	1
MUC21	0.00150935	-1.16121	0.221	0.359	1
ABCA12	0.00170634	-0.338122	0.15	0.291	1
VSIG10L	0.00172832	-0.361848	0.097	0.215	1
SOD2	0.00173011	-0.256638	0.212	0.381	1
CDKN1A	0.00177197	-0.266052	0.345	0.526	1
TUBB2A	0.00182324	-0.32388	0.407	0.586	1
C10orf99	0.00183221	-0.263122	0.168	0.311	1
PMEPA1	0.00186749	0.27151	0.381	0.261	1
ALOX12	0.00193861	-0.769242	0.133	0.265	1
SERPINB5	0.00198247	-0.288419	0.46	0.648	1
S100A11	0.00204693	-0.369311	0.867	0.865	1
CITED2	0.00214728	-0.294719	0.159	0.311	1
THEM5	0.00215674	-0.264564	0.115	0.25	1
IGFBP3	0.00227579	-0.314489	0.142	0.276	1
NECTIN1	0.0022772	-0.258491	0.478	0.67	1
TACSTD2	0.00271935	-0.436875	0.938	0.874	1
CLEC11A	0.00273839	0.268782	0.274	0.175	1
MYH14	0.00275529	-0.28645	0.469	0.65	1
SPON2	0.0027979	0.337876	0.513	0.447	1
ATP1B1	0.00283142	-0.349472	0.159	0.31	1
IGLV3-1	0.00286728	-1.12876	0.195	0.316	1
YOD1	0.0030147	-0.343047	0.08	0.193	1
TMSB4X	0.00302478	-0.364105	0.991	0.965	1
SERPINB11	0.00309775	-0.38722	0.159	0.288	1
LAMA3	0.00314367	-0.252144	0.124	0.255	1
TXNDC5	0.00316363	-0.389579	0.327	0.492	1
CSTA	0.00326668	-0.663137	0.991	0.896	1
EID1	0.00335048	0.335517	0.513	0.466	1
DLX3	0.00373009	-0.254492	0.159	0.293	1
IGHV6-1	0.00374306	-0.371694	0.062	0.165	1
CLDN17	0.00376068	-0.314339	0.035	0.127	1
IGKC	0.00380105	-1.36392	1	1	1
TTC9	0.00415465	-0.313778	0.124	0.248	1
LSP1	0.00419353	-0.421188	0.434	0.583	1
LAMC2	0.00438689	-0.253491	0.035	0.128	1
CCL19	0.00444964	-0.384568	0.08	0.184	1
ITGA6	0.00474174	-0.270735	0.195	0.336	1
H1F0	0.00478243	-0.293019	0.195	0.337	1
SPRR2B	0.00488382	-0.291366	0.027	0.112	1
MXD1	0.00547178	-0.407403	0.186	0.32	1
ALDH3A1	0.00594314	-0.275718	0.469	0.618	1
DSC1	0.00656819	-0.346461	0.097	0.208	1
OCLN	0.00658066	-0.310146	0.106	0.211	1
THBD	0.00684965	-0.271423	0.336	0.484	1
GLTP	0.00686725	-0.505261	0.584	0.681	1
CLDN7	0.00686895	-0.35969	0.15	0.266	1
LOR	0.007282	-0.905224	0.929	0.737	1
JCHAIN	0.00774996	-1.02263	0.336	0.426	1
GAS1	0.0077986	0.276112	0.611	0.553	1
TP53INP2	0.00952113	-0.375807	0.186	0.296	1
CD79A	0.00998257	-0.275838	0.062	0.148	1
HBA2	0.010307	-0.251354	0.044	0.128	1
SFRP4	0.0106283	-0.283238	0.106	0.207	1
CLU	0.0108111	-0.378586	0.248	0.364	1
KRT80	0.0111797	-0.804832	0.372	0.502	1
WFDC12	0.0115834	-0.444795	0.088	0.184	1
DSG3	0.0119667	-0.345138	0.912	0.88	1
TGM7	0.0122742	-0.25941	0.08	0.169	1
ZFP36L2	0.0128505	-0.290004	0.469	0.609	1
IGHG2	0.0143253	-0.933159	1	0.742	1
IL36RN	0.014525	-0.48099	0.15	0.251	1
ACTA2	0.0148427	-0.276979	0.115	0.21	1
HEPHL1	0.0155072	-0.36399	0.133	0.227	1
GSDMA	0.0159967	-0.351427	0.062	0.142	1
CRNN	0.016567	-0.850678	0.991	0.781	1
LCN2	0.0166818	-0.515411	0.08	0.163	1
PLA2G4D	0.0168281	-0.546272	0.124	0.215	1
IGLC1	0.0174129	-1.08812	0.938	0.626	1
ELF3	0.0178525	-0.345054	0.08	0.161	1
ATP6V1C2	0.018011	-0.296707	0.088	0.178	1
CLCA4	0.0209961	-0.325617	0.053	0.128	1
PIM1	0.021368	-0.350352	0.274	0.399	1
IL32	0.0217043	-0.293933	0.115	0.2	1
KLK14	0.0217408	-0.424982	0.097	0.177	1
LCE3E	0.02216	-0.683807	0.133	0.225	1
SPRR1B	0.0222715	-0.45776	0.531	0.629	1
GPRC5A	0.0240528	-0.258688	0.088	0.17	1
SPRR2G	0.0242637	-0.678655	0.982	0.813	1
KRT78	0.0249338	-1.0883	0.381	0.506	1
COL7A1	0.0257833	-0.31521	0.319	0.413	1
HIST1H1B	0.0296434	-0.305405	0.248	0.357	1
IGHG4	0.0305145	-1.28776	0.336	0.418	1
A2ML1	0.0314971	-0.439609	0.575	0.641	1
MT1X	0.0331294	-0.279583	0.381	0.498	1
A2M	0.0346454	-0.270937	0.124	0.199	1
IFITM3	0.0366983	-0.279143	0.796	0.784	1
LYPD5	0.0373608	-0.337074	0.088	0.163	1
HLA-DRA	0.0453612	-0.326382	0.239	0.336	1
ALOX12B	0.047288	-0.512972	0.186	0.267	1
SPRR2F	0.0494887	-0.315305	0.062	0.125	1
FAM43A	0.0500995	-0.252162	0.292	0.412	1
PPL	0.0532415	-0.596898	0.903	0.878	1
TMPRSS11B	0.0585686	-0.717772	0.257	0.346	1
EPS8L1	0.0606182	-0.397106	0.15	0.221	1
CXCL13	0.0610129	-0.375167	0.097	0.164	1
TGM6	0.0653861	-0.437545	0.177	0.248	1
DSC3	0.0662084	-0.254573	0.619	0.681	1
TGM1	0.0746399	-0.463464	0.301	0.379	1
PLXNB2	0.0850834	0.257037	0.549	0.598	1
KLK7	0.0954162	-0.67457	0.381	0.448	1
PSORS1C2	0.157705	-0.291458	0.062	0.104	1
IGHA1	0.164221	-1.13594	1	0.705	1
CRCT1	0.164294	-1.27503	0.805	0.715	1
IL36G	0.165899	-0.4193	0.212	0.277	1
APOE	0.190835	-0.320232	0.319	0.365	1
RHCG	0.197472	-0.781641	0.823	0.744	1
MAL	0.199413	-1.10415	0.637	0.64	1
SPINK7	0.212681	-1.01344	0.664	0.641	1
AQP1	0.214788	-0.269589	0.327	0.377	1
KRT2	0.238667	-0.778015	0.319	0.373	1
PPIF	0.241251	-0.40274	0.31	0.365	1
KRT15	0.255472	-0.297162	1	0.877	1
KRT23	0.277274	-0.307377	0.097	0.128	1
CNFN	0.280116	-0.734716	0.982	0.822	1
FLG	0.296927	-0.300311	0.186	0.224	1
SBSN	0.302335	-0.467981	1	0.922	1
SPRR2D	0.306396	-0.816356	0.973	0.805	1
TMPRSS11E	0.313161	-0.509719	0.195	0.233	1
KRT6B	0.330483	-0.436373	1	0.992	1
MMP13	0.345026	-0.525871	0.115	0.146	1
KRTDAP	0.351601	-0.539967	0.965	0.827	1
KRT4	0.372537	-1.22324	0.912	0.73	1
KRT13	0.399829	-0.599422	1	0.972	1
SPRR2A	0.413896	-0.705099	1	0.957	1
ASPRV1	0.447591	-0.639699	0.177	0.213	1
KLK13	0.461544	-0.533503	0.611	0.625	1
FDCSP	0.464988	-1.0452	0.274	0.312	1
ERO1A	0.518575	-0.444237	0.265	0.305	1
GJB2	0.522593	-0.257156	0.929	0.874	1
RPTN	0.530215	-0.765233	0.425	0.396	1
IGHM	0.561025	-0.398828	0.186	0.2	1
TGM3	0.598893	-0.607324	0.982	0.868	1
IGHG3	0.61941	-0.880492	0.513	0.451	1
CALML5	0.636686	-0.710668	0.381	0.416	1
COL17A1	0.654605	-0.364631	0.912	0.752	1
IVL	0.657014	-0.295789	0.947	0.828	1
CCER2	0.661349	-0.760636	0.221	0.204	1
KLK10	0.664509	-0.627886	0.779	0.666	1
SLPI	0.671619	-0.345567	0.788	0.701	1
ANXA1	0.792127	-0.487373	1	0.988	1
SPRR3	0.795519	-1.00599	1	0.946	1
ECM1	0.795628	-0.368433	0.292	0.314	1
LCE3D	0.821154	-1.05618	0.478	0.508	1
CDSN	0.845567	-0.952321	0.398	0.399	1
SPINK5	0.878786	-0.573057	0.938	0.786	1
IGKV4-1	0.908419	-0.651971	0.372	0.355	1
CSTB	0.916429	-0.74001	1	1	1
S100A7	0.926733	-0.719948	0.522	0.544	1
HOPX	0.94375	-0.543301	0.903	0.827	1
PI3	0.951513	-0.477385	0.265	0.248	1
EMP1	1	-0.664269	0.894	0.855	1

## Sheet: A1 - region 5
	p_val	avg_log2FC	pct.1	pct.2	p_val_adj
COL3A1	2.2517e-53	1.85766	1	0.921	3.32239e-49
COL1A1	3.30157e-51	2.07969	1	0.913	4.87146e-47
SPARC	3.52711e-50	1.82909	1	0.734	5.20425e-46
COL1A2	2.03944e-49	2.02296	1	0.981	3.0092e-45
MMP2	1.4142e-48	1.74837	0.98	0.41	2.08665e-44
PCOLCE	3.52957e-45	1.51399	1	0.521	5.20788e-41
COL12A1	5.30259e-45	1.5149	0.9	0.286	7.82398e-41
THBS2	2.4819e-44	1.34687	0.94	0.355	3.66204e-40
IGFBP4	2.24027e-43	1.55431	0.99	0.594	3.30552e-39
C1R	1.61571e-41	1.54809	0.98	0.532	2.38398e-37
FBLN1	1.7558e-41	1.40192	0.97	0.501	2.59068e-37
DCN	2.11885e-40	1.42762	1	0.736	3.12636e-36
SFRP4	1.92832e-39	1.51724	0.66	0.15	2.84524e-35
COL11A1	6.12276e-39	1.22407	0.79	0.237	9.03413e-35
VCAN	5.12672e-38	1.25477	0.89	0.318	7.56448e-34
AEBP1	3.91013e-37	1.50021	0.95	0.475	5.7694e-33
LUM	1.58888e-36	1.51456	0.97	0.475	2.34439e-32
MXRA8	2.87209e-36	1.16894	0.85	0.295	4.23777e-32
CTSK	3.00862e-36	1.37006	0.87	0.351	4.43923e-32
COL6A3	5.83475e-34	1.16008	0.94	0.434	8.60917e-30
COL6A2	9.32047e-34	1.19783	0.99	0.621	1.37524e-29
C1S	7.40592e-33	1.39315	0.9	0.405	1.09274e-28
TIMP2	3.29534e-31	1.25314	0.89	0.463	4.86227e-27
FN1	5.80287e-31	0.995893	0.94	0.422	8.56214e-27
OGN	1.3494e-30	0.805652	0.58	0.132	1.99104e-26
VIM	9.2139e-30	1.12352	1	0.717	1.35951e-25
OLFML3	2.1988e-29	0.701753	0.54	0.12	3.24432e-25
CTHRC1	1.13769e-28	0.82191	0.63	0.177	1.67867e-24
COL6A1	3.13206e-28	1.18946	0.96	0.644	4.62135e-24
OMD	6.13124e-28	0.563127	0.46	0.089	9.04664e-24
CXCL12	9.43143e-28	1.12933	0.97	0.496	1.39161e-23
CRISPLD2	1.14775e-27	0.904926	0.73	0.243	1.69351e-23
COL5A2	1.77592e-27	0.885186	0.73	0.244	2.62037e-23
IGFBP5	2.48573e-27	1.27252	0.99	0.752	3.66769e-23
PDGFRL	5.41874e-27	0.452068	0.35	0.051	7.99536e-23
FKBP10	6.45085e-27	0.805989	0.71	0.233	9.51823e-23
ASPN	1.12546e-26	0.705909	0.54	0.131	1.66062e-22
FSTL1	1.25433e-26	1.07679	0.89	0.4	1.85076e-22
COL14A1	2.53591e-26	0.954927	0.81	0.336	3.74173e-22
PDGFRB	3.35658e-26	0.858109	0.77	0.293	4.95264e-22
MFAP4	1.21041e-25	0.826302	0.65	0.198	1.78596e-21
FBN1	1.54622e-25	1.10918	0.89	0.459	2.28144e-21
POSTN	1.88465e-25	1.23759	0.82	0.368	2.78081e-21
RCN3	1.9502e-25	0.557797	0.6	0.16	2.87753e-21
BGN	2.03959e-25	0.864931	0.87	0.359	3.00942e-21
LRRC15	2.47068e-25	0.789075	0.57	0.157	3.64548e-21
LGALS1	4.5501e-25	0.886246	0.84	0.364	6.71368e-21
TWIST2	1.14125e-24	0.658686	0.67	0.213	1.68392e-20
NBL1	1.34991e-24	1.07089	0.86	0.459	1.99179e-20
SPON1	2.5283e-24	0.621766	0.53	0.131	3.73051e-20
CPXM1	2.67309e-24	0.790765	0.61	0.187	3.94414e-20
COL5A1	4.85383e-24	0.953737	0.78	0.334	7.16182e-20
MARCKS	7.66824e-24	0.825824	1	0.857	1.13145e-19
PRRX1	1.8929e-23	0.882534	0.87	0.422	2.79297e-19
RARRES2	1.9111e-23	0.733893	0.66	0.219	2.81983e-19
DCHS1	3.26575e-23	0.545519	0.5	0.126	4.81862e-19
COL16A1	4.58913e-23	0.841979	0.91	0.425	6.77126e-19
FNDC1	5.5342e-23	0.385379	0.21	0.018	8.16572e-19
PLPP3	2.08121e-22	0.855355	0.74	0.3	3.07082e-18
SERPINF1	7.73242e-22	0.978663	0.71	0.308	1.14092e-17
RASD1	2.37274e-21	0.640734	0.52	0.148	3.50098e-17
HTRA1	3.02052e-21	0.772421	0.76	0.331	4.45678e-17
PDGFRA	3.05174e-21	0.623502	0.53	0.154	4.50284e-17
CD99	3.86198e-21	0.850144	0.89	0.668	5.69835e-17
FMOD	4.0704e-20	0.936751	0.75	0.357	6.00587e-16
EGFL6	5.40355e-20	0.381456	0.37	0.077	7.97294e-16
DKK3	9.91461e-20	0.722284	0.79	0.359	1.4629e-15
FBLN2	2.14154e-19	0.784618	0.81	0.353	3.15984e-15
PRELP	2.57815e-19	0.535596	0.42	0.105	3.80405e-15
MMP14	3.82254e-19	0.816736	0.8	0.413	5.64016e-15
PTGDS	4.16191e-19	1.00358	0.92	0.558	6.1409e-15
KRT14	4.95862e-19	-0.623277	1	1	7.31644e-15
OLFML2B	5.56565e-18	0.557819	0.44	0.124	8.21212e-14
IGDCC4	1.35331e-17	0.30731	0.25	0.039	1.99681e-13
ADAMTS2	1.94754e-17	0.68077	0.57	0.204	2.8736e-13
THY1	2.02746e-17	0.726468	0.55	0.194	2.99152e-13
LRP1	3.89004e-17	0.812892	0.71	0.346	5.73976e-13
SOD3	6.89582e-17	0.64096	0.75	0.339	1.01748e-12
C19orf33	7.09944e-17	-0.813486	0.3	0.716	1.04752e-12
ITGA11	7.22009e-17	0.303114	0.25	0.041	1.06532e-12
PMEPA1	8.16974e-17	0.552042	0.62	0.238	1.20545e-12
CD63	1.44523e-16	0.727384	0.9	0.627	2.13244e-12
CREB3L1	1.90416e-16	0.479981	0.48	0.148	2.80959e-12
GLT8D2	2.15654e-16	0.443049	0.43	0.123	3.18197e-12
PKP3	2.6515e-16	-0.816504	0.37	0.751	3.91229e-12
EMILIN1	2.73088e-16	0.560965	0.47	0.151	4.02941e-12
GPRC5B	3.26454e-16	0.45148	0.37	0.096	4.81683e-12
PTGFR	3.41531e-16	0.39292	0.33	0.076	5.03929e-12
CD248	6.70801e-16	0.406506	0.42	0.119	9.89767e-12
ALPL	8.37273e-16	0.565387	0.39	0.112	1.2354e-11
FGFR1	8.76581e-16	0.536102	0.51	0.177	1.2934e-11
FABP5	9.64516e-16	-0.75942	0.98	0.995	1.42314e-11
DSP	1.15679e-15	-0.745646	0.98	0.99	1.70684e-11
SIX2	1.20615e-15	0.297696	0.3	0.064	1.77968e-11
GAS1	1.20702e-15	0.765273	0.84	0.53	1.78096e-11
PRSS35	1.42205e-15	0.311518	0.23	0.038	2.09823e-11
NFATC4	1.85293e-15	0.582928	0.58	0.231	2.734e-11
ANGPTL2	1.91174e-15	0.504492	0.46	0.151	2.82077e-11
PODN	2.53317e-15	0.404047	0.38	0.101	3.73769e-11
SSC5D	2.57952e-15	0.368985	0.35	0.088	3.80608e-11
SPINT2	4.59486e-15	-0.760444	0.47	0.784	6.77972e-11
NNMT	5.61112e-15	0.36507	0.42	0.122	8.27921e-11
TRIM29	5.66064e-15	-0.651434	0.98	0.997	8.35228e-11
PKP1	6.01168e-15	-0.731729	0.89	0.976	8.87023e-11
FOSB	6.39642e-15	0.731795	0.98	0.801	9.43792e-11
CORIN	6.83647e-15	0.429174	0.37	0.102	1.00872e-10
TIMP3	7.60107e-15	0.808891	0.65	0.287	1.12154e-10
CFD	1.06408e-14	0.677088	0.72	0.343	1.57005e-10
MYL9	2.03321e-14	0.491987	0.58	0.23	2.99999e-10
S100A4	5.52786e-14	0.645185	0.89	0.583	8.15636e-10
CDH11	6.26002e-14	0.414921	0.37	0.106	9.23666e-10
S100A16	6.98649e-14	-0.817288	0.71	0.909	1.03086e-09
SLC9A3R1	7.13005e-14	-0.738889	0.49	0.794	1.05204e-09
UCHL1	8.98913e-14	0.256275	0.23	0.044	1.32635e-09
CERCAM	9.8818e-14	0.654257	0.57	0.262	1.45806e-09
TIMP1	1.43573e-13	0.551381	0.65	0.288	2.11842e-09
JUP	1.66789e-13	-0.676697	0.95	0.983	2.46097e-09
FAT4	1.98313e-13	0.267534	0.3	0.073	2.92611e-09
CLEC11A	2.15151e-13	0.483803	0.45	0.159	3.17455e-09
TSPAN4	2.54021e-13	0.467335	0.5	0.188	3.74808e-09
KRT76	2.61951e-13	-1.54199	1	1	3.86509e-09
PERP	4.58119e-13	-0.646801	0.94	0.988	6.75955e-09
SVEP1	5.11007e-13	0.29337	0.24	0.051	7.53991e-09
COL27A1	6.32707e-13	0.461237	0.48	0.178	9.33559e-09
TPM1	6.53204e-13	0.424805	0.53	0.204	9.63803e-09
PMP22	9.20093e-13	0.462832	0.48	0.179	1.3576e-08
CCDC80	1.22628e-12	0.369376	0.35	0.102	1.80938e-08
TENT5A	1.23662e-12	0.55089	0.63	0.301	1.82463e-08
JUN	1.87073e-12	0.663309	0.88	0.686	2.76026e-08
KLF5	2.76645e-12	-0.657596	0.43	0.776	4.0819e-08
PRSS23	3.43213e-12	0.605606	0.58	0.273	5.0641e-08
DSG3	3.45991e-12	-0.790063	0.71	0.901	5.1051e-08
SELENOM	4.06985e-12	0.524758	0.56	0.244	6.00507e-08
LAMA4	4.79544e-12	0.523931	0.58	0.257	7.07567e-08
DNM1	4.80019e-12	0.420867	0.52	0.206	7.08268e-08
NR4A1	5.60818e-12	0.724769	0.71	0.4	8.27488e-08
FGF7	6.6021e-12	0.36372	0.32	0.094	9.74139e-08
ENTPD1	7.04172e-12	0.395711	0.37	0.122	1.03901e-07
FKBP7	7.66247e-12	0.264221	0.26	0.064	1.1306e-07
CPXM2	1.06452e-11	0.472388	0.41	0.151	1.57069e-07
S100A8	1.10513e-11	-0.820164	1	1	1.63063e-07
CALD1	1.10718e-11	0.604906	0.73	0.441	1.63364e-07
APOE	1.13429e-11	0.547424	0.7	0.326	1.67365e-07
COL4A2	1.22114e-11	0.378989	0.46	0.174	1.80179e-07
SPON2	1.34138e-11	0.597361	0.74	0.425	1.97921e-07
SLIT3	1.96016e-11	0.370044	0.4	0.141	2.89221e-07
KLK11	2.28042e-11	-0.799517	0.42	0.704	3.36476e-07
PRKG1	2.89156e-11	0.388152	0.45	0.168	4.26649e-07
PTK7	4.89853e-11	0.536121	0.53	0.247	7.22778e-07
ABLIM1	4.96128e-11	-0.713411	0.41	0.678	7.32037e-07
KIF26B	5.35221e-11	0.396403	0.42	0.158	7.89718e-07
IGFBP7	5.35506e-11	0.601338	0.8	0.473	7.90139e-07
AQP3	5.62717e-11	-0.670036	0.91	0.967	8.30289e-07
NEGR1	5.96911e-11	0.289783	0.29	0.083	8.80743e-07
KRT6B	6.14953e-11	-0.965315	1	0.992	9.07363e-07
MYO15B	6.42326e-11	0.432623	0.52	0.233	9.47751e-07
EVPL	6.82927e-11	-0.610269	0.63	0.869	1.00766e-06
CCN2	7.70701e-11	0.438393	0.55	0.237	1.13717e-06
ANXA5	8.26021e-11	0.502663	0.67	0.356	1.21879e-06
AXL	9.32141e-11	0.339762	0.36	0.121	1.37537e-06
MAP1B	1.26056e-10	0.477414	0.58	0.275	1.85995e-06
PSAP	1.2734e-10	0.493152	0.96	0.943	1.8789e-06
PITX1	1.41109e-10	-0.635256	0.48	0.781	2.08206e-06
APOD	1.48791e-10	0.41026	0.56	0.253	2.19542e-06
TSPYL2	1.76497e-10	0.424192	0.52	0.231	2.60421e-06
TUBB2A	1.77875e-10	-0.74638	0.29	0.595	2.62454e-06
ANK2	1.85358e-10	0.257022	0.23	0.057	2.73495e-06
HSPB1	1.9287e-10	-0.501369	1	0.999	2.84579e-06
FARP1	2.01927e-10	0.335944	0.36	0.126	2.97944e-06
MRC2	2.0844e-10	0.506478	0.74	0.416	3.07554e-06
RIPOR3	2.09276e-10	0.267312	0.31	0.095	3.08786e-06
TUBA4A	2.09638e-10	-0.581074	0.52	0.78	3.0932e-06
IFI27	3.05828e-10	-0.523568	0.83	0.984	4.5125e-06
FBLN5	3.10313e-10	0.278039	0.29	0.086	4.57866e-06
TBX2	3.37167e-10	0.304511	0.35	0.119	4.9749e-06
TMPRSS11D	3.76824e-10	-0.779776	0.56	0.828	5.56004e-06
C6orf132	4.45292e-10	-0.608856	0.41	0.7	6.57029e-06
MYLK	4.62323e-10	0.365102	0.4	0.152	6.82157e-06
MFAP2	4.73875e-10	0.316235	0.3	0.094	6.99203e-06
SFRP1	4.75355e-10	0.292798	0.33	0.109	7.01386e-06
KRT5	4.92746e-10	-0.609565	1	0.995	7.27046e-06
ISLR	5.18559e-10	0.291502	0.32	0.104	7.65133e-06
CTNND1	5.33831e-10	-0.538045	0.64	0.846	7.87668e-06
NID1	5.87628e-10	0.312261	0.32	0.105	8.67045e-06
SQSTM1	6.78578e-10	0.46664	0.92	0.821	1.00124e-05
PXDN	7.21301e-10	0.356978	0.27	0.082	1.06428e-05
MMP19	7.2415e-10	0.267103	0.33	0.108	1.06848e-05
FOXF2	7.24757e-10	0.35395	0.28	0.087	1.06938e-05
CSTB	7.97945e-10	-1.22445	1	1	1.17737e-05
CCN1	8.22959e-10	0.596438	0.59	0.311	1.21428e-05
LAMB1	9.83246e-10	0.426335	0.37	0.144	1.45078e-05
LY6D	1.04788e-09	-0.711366	0.8	0.905	1.54615e-05
RGS3	1.23735e-09	0.334681	0.39	0.146	1.82571e-05
LOX	1.29265e-09	0.491597	0.5	0.241	1.9073e-05
S100A14	1.30267e-09	-0.692094	0.91	0.972	1.92209e-05
CAVIN1	1.35992e-09	0.520867	0.96	0.789	2.00657e-05
BMERB1	1.51902e-09	0.307018	0.36	0.131	2.24132e-05
ITGBL1	1.66691e-09	0.307127	0.29	0.093	2.45953e-05
FTL	1.83099e-09	0.574073	0.86	0.764	2.70163e-05
TMEM263	2.23772e-09	0.333462	0.41	0.164	3.30175e-05
SERPINB5	2.30212e-09	-0.643191	0.4	0.652	3.39677e-05
MYH14	2.35583e-09	-0.68871	0.38	0.657	3.47602e-05
LYPD3	2.64928e-09	-0.685384	0.89	0.96	3.90901e-05
CAST	2.73256e-09	-0.465173	0.53	0.805	4.0319e-05
PGD	3.14362e-09	-0.550112	0.45	0.732	4.63841e-05
KCTD12	3.40557e-09	0.404878	0.52	0.244	5.02491e-05
FCGRT	3.86772e-09	0.463053	0.65	0.368	5.70682e-05
ADAM33	4.05396e-09	0.431568	0.45	0.201	5.98161e-05
SPRR1B	4.29274e-09	-0.912145	0.39	0.642	6.33394e-05
NECTIN4	4.78573e-09	-0.593868	0.25	0.54	7.06134e-05
CLTB	5.30874e-09	-0.51021	0.8	0.918	7.83304e-05
DSC3	6.62878e-09	-0.669494	0.47	0.695	9.78076e-05
DSG1	7.38572e-09	-0.650878	0.93	0.962	0.000108976
TPM2	7.4657e-09	0.453319	0.62	0.342	0.000110156
LTB4R	7.63897e-09	-0.586163	0.43	0.672	0.000112713
AQP1	7.88426e-09	0.295643	0.68	0.341	0.000116332
IL11RA	8.1453e-09	0.318914	0.39	0.156	0.000120184
FOS	9.67943e-09	0.413836	1	0.933	0.00014282
C1QTNF6	1.05169e-08	0.287249	0.28	0.094	0.000155177
GOLM1	1.06739e-08	0.252737	0.26	0.082	0.000157494
LTBP3	1.07065e-08	0.453034	0.7	0.418	0.000157975
ZNF503	1.86672e-08	0.342788	0.36	0.145	0.000275435
DSC2	1.9126e-08	-0.541034	0.9	0.967	0.000282204
S100A9	1.94516e-08	-0.737272	1	1	0.000287008
ALDH3A1	2.16824e-08	-0.629015	0.37	0.627	0.000319924
SLC39A13	2.52403e-08	0.372898	0.43	0.2	0.000372421
CD276	2.71793e-08	0.253164	0.35	0.135	0.000401031
FDCSP	3.20954e-08	-0.562903	0.58	0.28	0.000473567
PLTP	3.38626e-08	0.428201	0.49	0.25	0.000499642
SPINK5	3.48235e-08	-1.05745	0.63	0.819	0.00051382
EID1	3.60642e-08	0.402561	0.73	0.444	0.000532128
PROM2	4.06129e-08	-0.544792	0.32	0.553	0.000599244
ARHGEF4	4.14851e-08	-0.543068	0.31	0.571	0.000612113
A2ML1	4.6144e-08	-0.835837	0.46	0.652	0.000680855
PPL	4.73355e-08	-0.918984	0.74	0.895	0.000698435
CALU	4.77749e-08	0.358999	0.51	0.254	0.000704919
IGHG3	5.13431e-08	0.33112	0.76	0.427	0.000757567
PABPC1	5.98177e-08	-0.420524	0.94	0.988	0.00088261
CAVIN3	6.78878e-08	0.346829	0.42	0.188	0.00100168
TXN	7.03362e-08	-0.569779	0.89	0.931	0.00103781
ARPC2	7.23879e-08	-0.436437	0.59	0.809	0.00106808
SH3PXD2B	7.31639e-08	0.391223	0.44	0.207	0.00107953
GJB2	7.65604e-08	-0.711669	0.79	0.889	0.00112965
ANTXR1	7.75065e-08	0.335283	0.4	0.178	0.00114361
SORBS3	8.00456e-08	0.333101	0.53	0.27	0.00118107
LIMA1	8.46816e-08	0.29639	0.45	0.21	0.00124948
RAB5IF	9.04882e-08	-0.441443	0.16	0.436	0.00133515
SBSN	9.59467e-08	-0.926503	0.94	0.929	0.00141569
THBD	9.93425e-08	-0.556832	0.23	0.493	0.0014658
NLGN2	1.04359e-07	0.329644	0.38	0.166	0.00153981
KRT16	1.11463e-07	-0.529818	1	1	0.00164463
MEGF6	1.12177e-07	0.410344	0.62	0.355	0.00165517
TACSTD2	1.12374e-07	-0.668319	0.77	0.892	0.00165808
IFFO2	1.16735e-07	-0.695489	0.24	0.498	0.00172243
THSD4	1.19752e-07	0.332708	0.4	0.179	0.00176694
MINK1	1.25096e-07	-0.466047	0.38	0.632	0.00184579
TSC22D3	1.35468e-07	0.408047	0.8	0.503	0.00199882
SGK1	1.35611e-07	-0.525328	0.51	0.755	0.00200094
MARVELD1	1.40708e-07	0.306886	0.41	0.188	0.00207615
MDK	1.46066e-07	0.334055	0.34	0.142	0.0021552
IVNS1ABP	1.56993e-07	-0.550462	0.36	0.578	0.00231644
PGLYRP3	1.5993e-07	-0.504769	0.06	0.306	0.00235977
HEXB	1.72091e-07	0.270385	0.35	0.145	0.0025392
SELENOP	1.88575e-07	0.425557	0.66	0.403	0.00278242
LAD1	2.07527e-07	-0.519217	0.51	0.739	0.00306206
EPPK1	2.09405e-07	-0.675311	0.63	0.786	0.00308977
FNDC3B	2.23714e-07	0.352932	0.53	0.273	0.0033009
IVL	2.24043e-07	-0.842675	0.71	0.853	0.00330576
RAPGEFL1	2.29594e-07	-0.479385	0.23	0.468	0.00338766
SOCS3	2.36798e-07	0.415856	0.58	0.326	0.00349395
PHLDB1	2.45705e-07	0.328466	0.48	0.238	0.00362537
WLS	2.48546e-07	0.336691	0.51	0.267	0.0036673
CLCA2	2.59189e-07	-0.52314	0.19	0.432	0.00382433
TRIM2	2.97281e-07	0.305782	0.31	0.126	0.00438639
ZBTB7B	3.32773e-07	-0.461499	0.23	0.491	0.00491006
FLNA	3.337e-07	0.413184	0.92	0.736	0.00492374
MIF	3.6161e-07	-0.438157	0.58	0.782	0.00533555
EIF4G1	3.66582e-07	-0.376539	0.73	0.885	0.00540891
SLC40A1	3.80646e-07	0.293942	0.26	0.096	0.00561644
TMEM79	3.83465e-07	-0.40291	0.1	0.346	0.00565802
FKBP9	4.08265e-07	0.464012	0.57	0.347	0.00602395
KLF4	4.57173e-07	-0.437638	0.73	0.863	0.00674559
PCDHGC3	5.24971e-07	0.276255	0.48	0.24	0.00774595
SLC22A17	6.34759e-07	0.322418	0.39	0.181	0.00936587
SH3RF2	6.70927e-07	-0.480476	0.21	0.462	0.00989952
LOXL1	6.72443e-07	0.289764	0.36	0.16	0.00992189
EGR1	8.19882e-07	0.446799	0.83	0.666	0.0120974
CDC42EP5	8.5789e-07	0.255268	0.37	0.166	0.0126582
EHF	8.61269e-07	-0.441286	0.43	0.66	0.012708
ENO1	9.07179e-07	-0.43957	0.73	0.891	0.0133854
FAM83G	9.2907e-07	-0.563519	0.32	0.549	0.0137084
EZR	9.94662e-07	-0.489183	0.35	0.556	0.0146762
S100A2	1.0654e-06	-0.726998	0.79	0.882	0.01572
ZFP36	1.10475e-06	0.38283	0.8	0.699	0.0163007
GIPC1	1.16335e-06	-0.394057	0.44	0.698	0.0171652
MX1	1.39863e-06	-0.412521	0.22	0.472	0.0206368
PHLDB2	1.44337e-06	0.348833	0.37	0.175	0.0212969
LAMB2	1.45989e-06	0.308853	0.68	0.388	0.0215407
IL1RN	1.5028e-06	-0.84728	0.76	0.91	0.0221738
CYP26B1	1.50293e-06	0.476383	0.47	0.267	0.0221758
VAV3	1.62747e-06	-0.462791	0.17	0.399	0.0240133
SERPING1	1.64265e-06	0.301112	0.41	0.197	0.0242373
GPNMB	1.87015e-06	0.371939	0.69	0.426	0.027594
GSTP1	2.01191e-06	-0.384565	0.99	0.977	0.0296857
ZNF185	2.07393e-06	-0.519024	0.35	0.57	0.0306009
TWSG1	2.22702e-06	0.258545	0.32	0.141	0.0328597
CD44	2.27013e-06	-0.464077	0.89	0.93	0.0334958
B4GALNT3	2.5079e-06	-0.353834	0.07	0.285	0.037004
TNS2	2.56035e-06	0.300909	0.35	0.163	0.037778
PGRMC1	2.59351e-06	0.44628	0.54	0.341	0.0382673
TAGLN	2.67467e-06	0.312324	0.39	0.19	0.0394647
LTBP2	2.72565e-06	0.369337	0.41	0.214	0.040217
ZNF750	3.66919e-06	-0.50927	0.29	0.507	0.0541389
DHCR24	3.71842e-06	-0.470964	0.27	0.483	0.0548652
RAB10	3.74658e-06	-0.430597	0.29	0.505	0.0552809
C1orf116	4.05691e-06	-0.544929	0.11	0.321	0.0598597
FXYD3	4.49378e-06	-0.466213	0.33	0.55	0.0663057
P3H3	4.56471e-06	0.29051	0.29	0.127	0.0673523
EPS8L2	4.61985e-06	-0.427813	0.46	0.699	0.068166
ANXA6	5.21277e-06	0.286824	0.37	0.177	0.0769144
ARRDC1	5.34474e-06	-0.279338	0.05	0.258	0.0788617
BCL2L2	5.57481e-06	-0.375363	0.21	0.434	0.0822564
SDC1	5.82693e-06	-0.382511	0.88	0.941	0.0859763
PITX2	6.15757e-06	-0.442163	0.25	0.484	0.0908549
DUOX1	6.51753e-06	-0.468078	0.32	0.513	0.0961662
EHD2	7.0017e-06	0.307274	0.62	0.377	0.10331
ERBB3	7.25387e-06	-0.379429	0.15	0.36	0.107031
TACC2	7.36672e-06	-0.403778	0.29	0.507	0.108696
CAPNS2	7.82421e-06	-0.383834	0.19	0.422	0.115446
TALDO1	7.88191e-06	-0.367727	0.32	0.564	0.116298
PPDPF	8.11946e-06	-0.343969	0.81	0.959	0.119803
ITGB5	8.41883e-06	0.368226	0.63	0.421	0.12422
ELL2	8.72488e-06	-0.358258	0.5	0.735	0.128736
CDC42BPG	9.1829e-06	-0.390275	0.17	0.38	0.135494
TFAP2A	9.49434e-06	-0.421176	0.2	0.404	0.140089
PTGR1	9.5939e-06	-0.382702	0.16	0.373	0.141558
EEF1G	9.71536e-06	-0.392236	0.88	0.932	0.14335
DIAPH1	9.7822e-06	-0.345743	0.14	0.358	0.144336
SH3BGRL3	9.79974e-06	-0.367424	0.41	0.653	0.144595
HSPA4	9.9847e-06	-0.323804	0.11	0.321	0.147324
FOXE1	1.0387e-05	-0.383739	0.23	0.445	0.15326
GLTP	1.12447e-05	-0.713992	0.54	0.684	0.165915
KLK12	1.21608e-05	-0.838678	0.16	0.352	0.179432
TAGLN2	1.24821e-05	-0.388976	0.8	0.897	0.184174
RANGAP1	1.24913e-05	-0.358768	0.19	0.402	0.184309
SDCBP2	1.25702e-05	-0.407293	0.07	0.262	0.185473
LRATD1	1.30668e-05	-0.403188	0.18	0.39	0.192801
S100A11	1.30739e-05	-0.488329	0.71	0.881	0.192906
CSTA	1.30867e-05	-0.800929	0.91	0.906	0.193094
S100A10	1.33476e-05	-0.40322	0.8	0.896	0.196944
PFN1	1.3598e-05	-0.3735	0.91	0.933	0.200638
RAB31	1.38283e-05	0.277121	0.38	0.194	0.204037
KLK7	1.38721e-05	-1.04808	0.28	0.457	0.204683
SLPI	1.47646e-05	-0.780839	0.59	0.722	0.217852
MGLL	1.52061e-05	-0.390226	0.16	0.364	0.224366
MYC	1.55481e-05	-0.57921	0.75	0.839	0.229413
CTNNBIP1	1.62178e-05	-0.391735	0.72	0.862	0.239293
MAL2	1.63426e-05	-0.489643	0.35	0.526	0.241135
NIBAN2	1.64833e-05	-0.428591	0.63	0.807	0.24321
RAB11A	1.69688e-05	-0.466052	0.31	0.494	0.250374
SCEL	1.80588e-05	-0.775009	0.36	0.527	0.266457
TNS4	1.82354e-05	-0.519917	0.27	0.47	0.269063
SLC9A3	1.86301e-05	-0.398925	0.11	0.302	0.274887
REEP4	1.88994e-05	-0.348686	0.15	0.355	0.27886
NECTIN1	2.03638e-05	-0.397154	0.5	0.665	0.300467
RHOV	2.13622e-05	-0.446383	0.27	0.461	0.315199
KRT3	2.14072e-05	-0.861703	0.43	0.6	0.315863
TENT5B	2.26671e-05	-0.379044	0.19	0.384	0.334453
IRF9	2.36246e-05	-0.351914	0.21	0.426	0.34858
ULK3	2.40942e-05	-0.345378	0.05	0.229	0.355509
ITGB8	2.45518e-05	-0.265611	0.09	0.289	0.362262
LENG8	2.46394e-05	0.322478	0.85	0.687	0.363554
CHPF	2.4754e-05	0.282432	0.39	0.209	0.365246
IFI6	2.53759e-05	0.460645	0.76	0.582	0.374421
PBXIP1	2.54114e-05	0.282533	0.49	0.282	0.374945
GSN	2.55437e-05	0.285745	0.87	0.848	0.376897
CD81	2.58477e-05	0.354036	0.75	0.579	0.381382
IRF6	2.71957e-05	-0.379361	0.22	0.424	0.401273
GBP6	2.78979e-05	-0.459114	0.5	0.663	0.411633
NBEAL2	2.86717e-05	-0.424688	0.37	0.536	0.423051
RHCG	2.91548e-05	-1.05852	0.63	0.764	0.430178
SERPINB13	3.02923e-05	-0.676278	0.54	0.666	0.446962
CRYBG2	3.03625e-05	-0.294126	0.05	0.227	0.447999
TTC9	3.07277e-05	-0.47255	0.07	0.252	0.453387
PSMD2	3.10022e-05	-0.287751	0.13	0.334	0.457437
ADH7	3.14241e-05	-0.252437	0.03	0.201	0.463663
PRXL2A	3.20034e-05	-0.359774	0.12	0.318	0.47221
TMEM40	3.2104e-05	-0.433944	0.16	0.358	0.473694
RACK1	3.72291e-05	-0.344389	0.62	0.77	0.549315
KIFC2	3.73558e-05	-0.317979	0.13	0.33	0.551184
HOMER2	3.9202e-05	-0.405547	0.14	0.328	0.578425
SLURP2	3.976e-05	-0.781604	0.23	0.394	0.586659
AACS	3.97778e-05	-0.310446	0.14	0.347	0.586921
PPIB	4.01492e-05	0.393562	0.74	0.622	0.592401
MPZL2	4.07113e-05	-0.48152	0.54	0.675	0.600695
CCDC120	4.20182e-05	-0.302344	0.09	0.273	0.619979
FAM83H	4.41886e-05	-0.397448	0.32	0.509	0.652003
POF1B	4.4355e-05	-0.65535	0.17	0.358	0.654459
ESRP1	4.46344e-05	-0.29977	0.23	0.445	0.658581
CBX6	4.49784e-05	0.276201	0.45	0.257	0.663657
ETS2	4.79461e-05	-0.395929	0.32	0.498	0.707444
DYNLT3	4.93982e-05	-0.317979	0.15	0.345	0.728871
RNF145	5.14212e-05	-0.395929	0.32	0.488	0.758719
IGFBP2	5.50501e-05	-0.415052	0.55	0.714	0.812265
DENND2D	5.53018e-05	-0.274875	0.07	0.249	0.815978
NFE2L2	5.63379e-05	-0.434312	0.52	0.676	0.831266
CERS3	5.64669e-05	-0.385804	0.17	0.359	0.833168
HEBP2	5.64734e-05	-0.350414	0.38	0.569	0.833265
EXOC6B	5.64771e-05	-0.351836	0.32	0.493	0.833319
LGALS7	5.72644e-05	-0.360505	0.11	0.29	0.844937
WEE1	5.84721e-05	-0.358776	0.16	0.346	0.862756
DBI	5.93835e-05	-0.405941	0.66	0.843	0.876204
ECE1	6.02288e-05	0.252291	0.41	0.227	0.888676
TTC22	6.08748e-05	-0.278322	0.11	0.301	0.898207
UBA52	6.11459e-05	-0.313987	0.86	0.936	0.902208
CPEB2	6.15371e-05	-0.401389	0.29	0.49	0.907981
VAMP8	6.38219e-05	-0.345188	0.3	0.483	0.941692
PPP1CB	6.4788e-05	-0.398753	0.4	0.568	0.955947
CD24	6.50297e-05	-0.554055	0.44	0.584	0.959513
COL17A1	6.54385e-05	-0.826215	0.76	0.769	0.965545
SULT2B1	6.694e-05	-0.542065	0.2	0.384	0.9877
TMEM184A	6.8144e-05	-0.317062	0.07	0.241	1
TIAM1	6.85349e-05	-0.273757	0.08	0.256	1
HOPX	6.97223e-05	-0.877031	0.72	0.846	1
TMEM154	7.02765e-05	-0.33789	0.16	0.35	1
CRYAB	7.16818e-05	-0.555116	0.36	0.523	1
WNK1	7.18665e-05	-0.366531	0.64	0.786	1
PRSS27	7.22937e-05	-0.743647	0.13	0.308	1
F3	7.45064e-05	-0.579296	0.23	0.401	1
TSPO	7.54898e-05	-0.322303	0.61	0.777	1
NDFIP2	7.69426e-05	-0.279327	0.07	0.241	1
C10orf99	7.75022e-05	-0.373755	0.13	0.313	1
CNN3	7.75471e-05	0.354741	0.45	0.278	1
MALL	7.84376e-05	-0.418139	0.16	0.344	1
SPRR2A	8.13769e-05	-1.01461	1	0.957	1
MPP7	8.33586e-05	-0.318341	0.17	0.357	1
KLK10	8.41471e-05	-0.971123	0.54	0.691	1
MYD88	8.57656e-05	-0.265479	0.1	0.286	1
NRARP	8.65866e-05	-0.395929	0.16	0.346	1
MYCL	8.73298e-05	-0.290436	0.08	0.251	1
ERBB2	8.90443e-05	-0.362818	0.28	0.469	1
APP	8.98203e-05	0.292813	0.74	0.531	1
SEMA4B	9.11872e-05	-0.426876	0.35	0.506	1
PGAM1	9.39535e-05	-0.265611	0.12	0.307	1
DDR1	9.51451e-05	-0.378754	0.4	0.544	1
LGR4	9.97168e-05	-0.379987	0.2	0.381	1
AP1G2	0.000102942	-0.274478	0.15	0.347	1
HDGF	0.000107648	-0.312419	0.58	0.75	1
FAM110C	0.000117057	-0.346176	0.14	0.322	1
C21orf91	0.000118996	-0.257587	0.06	0.222	1
HSPB8	0.00012014	-0.394929	0.11	0.276	1
VLDLR	0.000122288	-0.294339	0.1	0.275	1
SLC39A6	0.000122783	-0.288223	0.08	0.246	1
PLEKHG6	0.000125061	-0.26046	0.08	0.25	1
GAS6	0.000125837	0.271293	0.43	0.25	1
TMEM54	0.000125918	-0.357826	0.2	0.373	1
ZBTB7C	0.000135535	-0.336595	0.23	0.405	1
DAPL1	0.000139308	-0.324078	0.11	0.286	1
SPPL3	0.000142011	-0.282578	0.12	0.296	1
CYSRT1	0.000142103	-0.482274	0.1	0.264	1
BDH1	0.000142283	-0.368378	0.19	0.367	1
CPEB4	0.000142908	-0.261223	0.06	0.222	1
JPT1	0.000144346	-0.354161	0.22	0.394	1
ZNF219	0.00015204	-0.298226	0.16	0.343	1
MKNK2	0.000158508	-0.301713	0.44	0.634	1
FAM83B	0.000158596	-0.333925	0.2	0.386	1
SLC25A39	0.000159224	-0.266676	0.13	0.307	1
EHBP1L1	0.000160266	-0.299921	0.48	0.665	1
SPINT1	0.000160516	-0.380213	0.3	0.483	1
KANK1	0.000167367	-0.317926	0.12	0.291	1
DYNLL1	0.000170096	-0.328365	0.36	0.543	1
IMPA2	0.000171513	-0.415966	0.32	0.479	1
MBOAT2	0.000173852	-0.327117	0.07	0.231	1
OSBPL2	0.000176887	-0.286501	0.17	0.347	1
EEF1B2	0.000178653	-0.395929	0.45	0.572	1
CDV3	0.000179579	-0.359922	0.53	0.664	1
DMKN	0.000184251	-0.685774	0.36	0.489	1
SDR16C5	0.00018759	-0.408207	0.17	0.332	1
PRSS8	0.000191191	-0.342916	0.11	0.277	1
TPD52	0.000195603	-0.296048	0.15	0.32	1
ARPC3	0.000198794	-0.275556	0.19	0.373	1
SERPINB2	0.000199489	-0.340454	0.04	0.184	1
CASZ1	0.000204411	-0.323705	0.15	0.316	1
PLEKHM2	0.000209162	-0.289887	0.22	0.403	1
EIF4B	0.000210398	-0.352145	0.52	0.688	1
GUK1	0.000213948	-0.309269	0.53	0.705	1
HSP90AB1	0.000216476	-0.322415	0.53	0.689	1
H1FX	0.000219579	0.264983	0.7	0.499	1
ESRP2	0.000226029	-0.32756	0.17	0.337	1
HIST1H1B	0.000226256	-0.574287	0.21	0.359	1
SLC2A1	0.000232216	-0.370158	0.22	0.391	1
CDH1	0.000233109	-0.324949	0.28	0.461	1
FRMD4B	0.000238356	-0.282697	0.07	0.224	1
MAST4	0.000239894	-0.342923	0.31	0.488	1
PLA2G4B	0.00024547	-0.310199	0.16	0.337	1
COL4A1	0.000245945	0.267095	0.35	0.194	1
TGM6	0.000254989	-0.621149	0.1	0.255	1
TMPRSS11A	0.000258758	-0.335888	0.16	0.323	1
GRHL1	0.000259903	-0.506138	0.21	0.365	1
TMEM45B	0.000269955	-0.273565	0.05	0.195	1
CDA	0.000273559	-0.389633	0.06	0.205	1
CWH43	0.000279263	-0.262361	0.07	0.222	1
CXCL13	0.000283061	0.336751	0.28	0.145	1
IL36A	0.000288817	-0.686361	0.08	0.23	1
NAA20	0.000295405	-0.321835	0.24	0.402	1
GSTA4	0.00029888	-0.315266	0.15	0.314	1
THEM5	0.000303263	-0.412978	0.1	0.25	1
VSIG10L	0.000308676	-0.409349	0.07	0.217	1
NOC2L	0.000311587	-0.253734	0.09	0.246	1
IFITM2	0.000311964	0.376367	0.66	0.52	1
RHOD	0.000317121	-0.377749	0.24	0.402	1
ETHE1	0.000323436	-0.260999	0.11	0.272	1
RIPK4	0.000331584	-0.277339	0.15	0.316	1
NDRG1	0.000333958	-0.304457	0.31	0.507	1
HK1	0.000347088	-0.304781	0.33	0.502	1
DUSP7	0.000351291	-0.297799	0.21	0.377	1
TP63	0.000352274	-0.42121	0.42	0.538	1
DNAJB1	0.000369307	-0.344283	0.5	0.631	1
GOLGA7B	0.000371289	-0.305599	0.09	0.24	1
LGALSL	0.000380374	-0.471458	0.36	0.513	1
DEGS1	0.000386209	-0.379866	0.25	0.408	1
INAVA	0.000386802	-0.269747	0.18	0.357	1
HLA-C	0.000393251	0.291585	0.68	0.496	1
IGKV4-1	0.000395477	-0.314783	0.57	0.335	1
TJP1	0.000399703	-0.339799	0.2	0.373	1
CAPN1	0.000407235	-0.302219	0.34	0.518	1
GJA1	0.000408504	-0.472167	0.75	0.829	1
LAMC1	0.000415473	0.285453	0.52	0.352	1
BICDL2	0.000429009	-0.281515	0.09	0.247	1
CITED4	0.000430492	-0.455948	0.29	0.434	1
CLDN17	0.000441474	-0.362583	0.01	0.129	1
CKB	0.000458983	-0.284627	0.14	0.299	1
PLXDC2	0.000485126	0.278609	0.61	0.442	1
NEFL	0.000494369	-0.295953	0.08	0.224	1
IL36RN	0.000501634	-0.642186	0.11	0.254	1
BICD2	0.000502287	-0.298269	0.64	0.79	1
EBPL	0.00051223	-0.338099	0.28	0.445	1
SYTL1	0.000520481	-0.352542	0.33	0.487	1
PLCH2	0.00053821	-0.335493	0.19	0.34	1
C12orf57	0.000558138	0.252545	0.46	0.305	1
TKT	0.000562893	-0.330515	0.17	0.321	1
IGSF3	0.000583929	-0.31998	0.18	0.333	1
SSNA1	0.000588629	-0.254456	0.12	0.272	1
VDAC1	0.000589338	-0.271406	0.19	0.349	1
GRHL3	0.000593917	-0.477218	0.33	0.454	1
SPRR3	0.000597744	-1.34155	1	0.946	1
RNF225	0.000615535	-0.574763	0.09	0.23	1
ATP5F1D	0.000632044	-0.333258	0.37	0.509	1
RAB3D	0.000637802	-0.307318	0.28	0.432	1
HSP90AA1	0.00065543	-0.310199	0.56	0.681	1
CELSR2	0.000664244	-0.297384	0.19	0.343	1
MCL1	0.000672768	0.257205	0.89	0.881	1
PLBD1	0.000717029	-0.359144	0.09	0.231	1
NFIC	0.000718483	0.270385	0.71	0.516	1
TGM3	0.000719905	-0.994254	0.87	0.881	1
MBNL1	0.000742651	-0.262893	0.2	0.364	1
HSPA9	0.000743473	-0.254456	0.2	0.37	1
IPPK	0.000772708	-0.273862	0.23	0.396	1
LETM1	0.000775437	-0.269773	0.13	0.277	1
HSPA1B	0.000777432	-0.302785	0.59	0.763	1
CLDN1	0.000788346	-0.485433	0.26	0.391	1
PLA2G4F	0.000793554	-0.315678	0.15	0.3	1
KRT80	0.000795581	-1.00688	0.38	0.499	1
WFDC5	0.000812801	-0.458419	0.06	0.19	1
GSTO1	0.000815179	-0.27411	0.13	0.277	1
SCD	0.000838982	-0.364283	0.17	0.31	1
KRTDAP	0.000859116	-0.905189	0.77	0.848	1
CLDN4	0.00086655	-0.502844	0.18	0.322	1
P2RY2	0.000886642	-0.264598	0.16	0.323	1
IL20RB	0.000894054	-0.270243	0.24	0.401	1
EXPH5	0.000905921	-0.293854	0.22	0.373	1
PPIF	0.000908811	-0.697584	0.24	0.371	1
SLC6A9	0.000912429	-0.272346	0.14	0.297	1
LAMP2	0.000940266	-0.293051	0.27	0.427	1
CHMP4C	0.000952347	-0.302344	0.08	0.217	1
VSNL1	0.000984769	-0.293417	0.17	0.318	1
RASAL1	0.00102851	-0.319622	0.09	0.225	1
SAMD1	0.00105078	-0.257062	0.14	0.284	1
HORMAD1	0.00107728	-0.269959	0.14	0.285	1
DUOXA1	0.00108144	-0.353891	0.38	0.504	1
CRYBG1	0.00108502	-0.346254	0.19	0.346	1
KIF5B	0.0010884	-0.270836	0.3	0.45	1
STX6	0.00109786	-0.258133	0.14	0.283	1
PDZK1IP1	0.0011172	-0.384599	0.16	0.301	1
RNF141	0.00113464	-0.284487	0.19	0.334	1
DOCK9	0.00115958	-0.273537	0.19	0.338	1
ADRB2	0.00121632	-0.314536	0.19	0.334	1
KRT13	0.00122073	-0.826587	1	0.973	1
EPHX3	0.00122483	-0.267031	0.07	0.2	1
ZNF385A	0.00126541	-0.344582	0.34	0.472	1
BST2	0.00129334	-0.439984	0.23	0.371	1
CNFN	0.00132413	-1.15588	0.85	0.837	1
COL5A3	0.00135264	0.259213	0.3	0.175	1
AFDN	0.00136126	-0.339345	0.19	0.331	1
RAB7A	0.00138466	-0.257115	0.41	0.575	1
AP2S1	0.0013922	-0.268956	0.46	0.597	1
TGM5	0.00140782	-0.347715	0.09	0.221	1
AHNAK2	0.0014289	-0.317263	0.39	0.529	1
TSPAN14	0.0014475	-0.255457	0.23	0.391	1
POLR2A	0.00146239	-0.283007	0.32	0.466	1
GRN	0.0014708	-0.271776	0.31	0.449	1
NUAK2	0.00149423	-0.282656	0.09	0.219	1
HEPHL1	0.00150119	-0.462361	0.1	0.229	1
SMARCA4	0.00152514	-0.254531	0.16	0.303	1
SLC16A9	0.00154654	-0.282405	0.19	0.336	1
CBR1	0.00158154	-0.409868	0.59	0.672	1
ZDHHC13	0.0015835	-0.261172	0.1	0.236	1
TRAK1	0.00161953	-0.286076	0.24	0.381	1
KIF1C	0.00162532	-0.303765	0.26	0.404	1
LPAR6	0.00163034	-0.337981	0.24	0.371	1
TP53	0.00167309	-0.254305	0.14	0.28	1
CDHR1	0.001712	-0.342794	0.15	0.284	1
RAB5B	0.00172923	-0.271174	0.26	0.405	1
HS3ST6	0.001773	-0.279378	0.11	0.242	1
FAM162A	0.00183054	-0.261289	0.18	0.321	1
COX5A	0.00191003	-0.253484	0.42	0.573	1
GPX3	0.00194686	-0.632508	0.28	0.396	1
DHCR7	0.00197888	-0.250636	0.1	0.229	1
KIAA1522	0.00198665	-0.300351	0.33	0.471	1
CLIP4	0.00201907	-0.252512	0.2	0.349	1
SRSF2	0.00201974	-0.287611	0.6	0.69	1
JAG1	0.00202621	-0.37768	0.41	0.502	1
ST14	0.00209629	-0.263034	0.22	0.362	1
ALS2CL	0.0021024	-0.261628	0.29	0.421	1
SLC47A2	0.00214169	-0.351562	0.25	0.372	1
DUOX2	0.00217135	-0.27271	0.09	0.214	1
KRT23	0.00217601	-0.439441	0.03	0.135	1
TOLLIP	0.00220713	-0.300209	0.34	0.456	1
TNK2	0.00221502	-0.251937	0.25	0.396	1
KLK13	0.00223805	-0.874154	0.57	0.629	1
SLK	0.00230839	-0.258793	0.35	0.501	1
LAPTM4A	0.00237416	0.250336	0.33	0.206	1
RMND5A	0.00239051	-0.316625	0.23	0.363	1
MTSS1	0.00240446	-0.259078	0.18	0.314	1
BMP7	0.00242839	-0.288579	0.18	0.308	1
GTF2IRD1	0.00244772	-0.253942	0.18	0.316	1
CRCT1	0.00245111	-1.4128	0.7	0.727	1
TNFRSF21	0.00248586	-0.340261	0.22	0.351	1
MXD1	0.00264635	-0.518548	0.19	0.318	1
EFNA3	0.00270066	-0.289592	0.18	0.307	1
PRKX	0.002706	-0.295519	0.24	0.366	1
CLIP1	0.00272984	-0.270267	0.36	0.495	1
BTG3	0.00273403	-0.270974	0.28	0.42	1
MICALL1	0.00277835	-0.268189	0.25	0.381	1
UQCRC1	0.00279736	-0.291423	0.27	0.399	1
SERPINB11	0.00294786	-0.50197	0.17	0.285	1
SPINK7	0.00294877	-1.19107	0.57	0.651	1
SAT1	0.00296053	-0.365667	0.56	0.633	1
GTF2I	0.00299032	-0.25973	0.5	0.629	1
SERINC2	0.00300135	-0.257468	0.15	0.28	1
RAB25	0.00305624	-0.345386	0.33	0.444	1
GJB6	0.00305819	-0.471898	0.26	0.387	1
TUT7	0.00307825	-0.286683	0.38	0.505	1
TGM1	0.00309238	-0.692775	0.28	0.381	1
SLC7A1	0.00309601	-0.301292	0.21	0.341	1
FAT2	0.00314134	-0.316913	0.3	0.432	1
CITED2	0.00319366	-0.424983	0.18	0.307	1
SPRR2D	0.00327948	-1.23571	0.84	0.821	1
NDRG2	0.00332156	-0.250781	0.23	0.373	1
NME2	0.00346003	-0.280451	0.27	0.403	1
ID1	0.00372372	-0.314675	0.7	0.782	1
PPP1R14C	0.00397159	-0.285033	0.26	0.382	1
MAFB	0.00403963	-0.277305	0.36	0.494	1
MBD2	0.00405916	-0.254957	0.4	0.516	1
NSG1	0.00432187	-0.361434	0.33	0.431	1
SEMA3F	0.00436263	-0.252684	0.37	0.494	1
BNIPL	0.00438049	-0.277037	0.31	0.434	1
ALOX12	0.00444518	-0.830853	0.15	0.261	1
CTBP1	0.0044769	-0.297525	0.44	0.534	1
EIF3A	0.00458014	-0.258199	0.57	0.685	1
LMO4	0.00478333	-0.395264	0.48	0.536	1
NFIX	0.0049097	-0.276025	0.27	0.398	1
FGFR3	0.00491261	-0.261773	0.31	0.437	1
PI3	0.00495814	-0.765438	0.15	0.26	1
PCDH1	0.005006	-0.323973	0.17	0.281	1
BAG1	0.00507761	-0.278948	0.42	0.527	1
CA12	0.00508225	-0.344732	0.32	0.417	1
TMEM134	0.00510011	-0.25533	0.32	0.446	1
PTPN13	0.00526346	-0.270974	0.31	0.433	1
CLDN7	0.00527195	-0.431231	0.15	0.264	1
OCLN	0.00527337	-0.350222	0.1	0.211	1
KRT10	0.0055743	-0.944946	0.99	0.903	1
RORA	0.00587875	-0.291898	0.29	0.405	1
CCL21	0.00616094	0.298472	0.2	0.107	1
HINT1	0.00637039	-0.252653	0.27	0.386	1
HRAS	0.00640176	-0.255109	0.29	0.403	1
SERBP1	0.00657095	-0.264621	0.76	0.83	1
KTN1	0.00734221	-0.301419	0.37	0.468	1
CLIC3	0.00745295	-0.60581	0.28	0.379	1
KLK8	0.0075279	-0.287566	0.14	0.254	1
ATP6V1C2	0.00764116	-0.415321	0.08	0.178	1
NPEPPS	0.00798368	-0.262772	0.26	0.372	1
GM2A	0.00824667	-0.429677	0.39	0.499	1
TMPRSS11B	0.00887554	-0.903453	0.25	0.345	1
MAPK13	0.0093217	-0.28212	0.34	0.444	1
SCRIB	0.00943104	-0.252437	0.35	0.453	1
IER3	0.00960381	-0.318456	0.26	0.358	1
ELOVL4	0.0100289	-0.43065	0.18	0.281	1
TMEM45A	0.0106797	-0.355177	0.14	0.243	1
QSOX1	0.010889	-0.387426	0.31	0.421	1
MAT2A	0.0109088	-0.278104	0.61	0.679	1
IL36G	0.011177	-0.630949	0.18	0.279	1
TNFSF10	0.0126021	-0.297297	0.35	0.465	1
CEACAM5	0.0130003	-0.322144	0.08	0.171	1
IGHG4	0.0130896	-0.567006	0.58	0.393	1
DSC1	0.0136078	-0.442723	0.11	0.205	1
ABCA12	0.0143553	-0.358143	0.19	0.285	1
UBC	0.0147536	-0.264972	1	1	1
GPRC5A	0.0152258	-0.30343	0.08	0.17	1
ERO1A	0.0152452	-0.667255	0.21	0.31	1
S100A7	0.0152873	-1.01631	0.47	0.549	1
SLC38A2	0.0155583	-0.265142	0.36	0.455	1
CYP4F22	0.015694	-0.362445	0.12	0.214	1
ATG9B	0.0157203	-0.299971	0.04	0.117	1
FAM83A	0.0158259	-0.274976	0.1	0.192	1
RAB5A	0.0158461	-0.307743	0.34	0.433	1
FLG	0.0158986	-0.429677	0.13	0.229	1
HMGCR	0.0160686	-0.266117	0.16	0.258	1
ATP1B1	0.016132	-0.453414	0.21	0.303	1
MUC21	0.0166011	-1.15253	0.27	0.352	1
NISCH	0.0166049	-0.282822	0.43	0.487	1
MAL	0.0176488	-1.21417	0.58	0.646	1
EPS8L1	0.017813	-0.472319	0.13	0.222	1
LYPD2	0.018073	-0.267801	0.05	0.129	1
GCLC	0.018689	-0.287448	0.19	0.284	1
DLX3	0.0187166	-0.275516	0.19	0.288	1
TP53AIP1	0.0198249	-0.315807	0.27	0.35	1
ATP1A1	0.0200296	-0.264113	0.31	0.416	1
DNASE1L2	0.0206223	-0.258531	0.05	0.127	1
LCN2	0.0212398	-0.544772	0.08	0.162	1
NAGK	0.0213397	-0.252753	0.38	0.465	1
LMO7	0.0214877	-0.504381	0.28	0.362	1
AKR1B10	0.0219691	-0.347456	0.37	0.435	1
SDR9C7	0.0225048	-0.278264	0.1	0.183	1
ENDOU	0.0227756	-0.295654	0.17	0.256	1
HIST1H3D	0.0234082	-0.26045	0.15	0.237	1
FUT6	0.0240696	-0.287371	0.04	0.11	1
AVPI1	0.0276727	-0.258329	0.14	0.227	1
ANKRD35	0.0335195	-0.292174	0.33	0.408	1
MMP13	0.0342625	-0.33044	0.22	0.135	1
NAB1	0.0350286	-0.278815	0.36	0.429	1
LAMB3	0.0363409	-0.413793	0.31	0.38	1
TMPRSS11E	0.0379479	-0.68255	0.16	0.236	1
ARRDC3	0.0409731	-0.278123	0.43	0.476	1
KRT1	0.042261	-0.819498	1	0.865	1
ITGB4	0.0429171	-0.290367	0.33	0.39	1
PTPRF	0.0440852	-0.291132	0.44	0.467	1
BOC	0.0485425	-0.293275	0.32	0.38	1
SLURP1	0.0497189	-0.594521	0.26	0.327	1
NCCRP1	0.0515455	-0.682092	0.31	0.359	1
CRNN	0.0551867	-1.26826	0.87	0.796	1
LAMA5	0.0563534	-0.274351	0.45	0.476	1
KPRP	0.0572082	-0.267801	0.05	0.108	1
FMO2	0.0574104	-0.343703	0.15	0.223	1
TP53INP2	0.0580372	-0.365908	0.22	0.291	1
KLK14	0.0647875	-0.414801	0.11	0.175	1
ALOX12B	0.0687302	-0.561939	0.2	0.264	1
FAM43A	0.0710037	-0.372494	0.35	0.405	1
PIM1	0.0713857	-0.450376	0.35	0.39	1
LYPD5	0.0748216	-0.390875	0.1	0.161	1
TPPP3	0.0812846	-0.314965	0.33	0.387	1
DUSP14	0.0835877	-0.286304	0.22	0.282	1
CALML5	0.0926964	-0.958039	0.38	0.416	1
SERPINB1	0.0965256	-0.368141	0.21	0.266	1
TGM7	0.103043	-0.250907	0.11	0.165	1
SPRR2B	0.11494	-0.264485	0.06	0.107	1
C15orf48	0.11965	-0.523668	0.13	0.181	1
PLA2G4D	0.124893	-0.572478	0.16	0.211	1
KLK6	0.133933	-0.403764	0.12	0.171	1
PRDM1	0.148885	-0.30197	0.2	0.247	1
SPNS2	0.150986	-0.410064	0.2	0.253	1
CLCA4	0.15901	-0.319622	0.08	0.124	1
KRT15	0.159941	-0.514143	0.99	0.88	1
MAP1LC3A	0.171297	-0.284146	0.25	0.29	1
SPRR2G	0.199167	-1.05753	0.9	0.824	1
MT1X	0.206279	-0.294991	0.49	0.486	1
KRT2	0.248033	-0.870215	0.35	0.369	1
PSORS1C2	0.256791	-0.325385	0.07	0.102	1
CD55	0.260696	-0.277636	0.47	0.475	1
ELF3	0.266361	-0.281506	0.12	0.156	1
RPTN	0.268547	-0.997188	0.4	0.399	1
KRT78	0.299904	-1.11357	0.53	0.489	1
LOR	0.30738	-1.29192	0.8	0.753	1
H1F0	0.326331	-0.269959	0.31	0.324	1
IGHM	0.335818	0.442527	0.24	0.194	1
LCE2C	0.365827	-0.311804	0.1	0.127	1
CCER2	0.378375	-0.828631	0.26	0.2	1
GSDMA	0.400039	-0.262411	0.11	0.136	1
GLUL	0.4061	-0.496513	0.74	0.756	1
TREX2	0.415022	-0.269773	0.13	0.153	1
SPRR2F	0.425408	-0.320334	0.1	0.12	1
WFDC12	0.465444	-0.414937	0.16	0.175	1
ANXA1	0.507537	-0.694001	1	0.988	1
LCE3D	0.592824	-1.16619	0.54	0.501	1
LCE3E	0.654152	-0.594025	0.21	0.216	1
LSP1	0.66994	-0.275457	0.66	0.558	1
KRT4	0.765234	-1.32175	0.92	0.732	1
EMP1	0.88412	-0.617145	0.88	0.857	1
CDSN	0.89503	-1.06527	0.45	0.394	1
ASPRV1	0.963786	-0.714835	0.22	0.209	1

## Sheet: A1 - region 6
	p_val	avg_log2FC	pct.1	pct.2	p_val_adj
PLA2G4F	5.87123e-50	1.11532	0.919	0.232	8.663e-46
DAPL1	9.15466e-49	1.05764	0.907	0.216	1.35077e-44
DSP	1.48678e-46	1.15763	1	0.988	2.19374e-42
CDHR1	1.01758e-42	1.15496	0.849	0.223	1.50144e-38
PKP1	1.77742e-42	1.00222	1	0.965	2.62258e-38
EPPK1	5.69974e-42	1.46225	1	0.752	8.40997e-38
DSC3	1.15631e-41	1.24344	1	0.647	1.70614e-37
TRIM29	1.22404e-40	0.843477	1	0.995	1.80606e-36
GSTA4	3.87191e-40	0.877269	0.895	0.248	5.71301e-36
LGALS7	6.18803e-40	1.00345	0.837	0.226	9.13044e-36
CYP3A5	1.10565e-39	0.779227	0.767	0.168	1.63139e-35
S100A6	3.17702e-39	-2.04458	0.465	0.934	4.6877e-35
SPRR3	3.43286e-39	-3.1324	0.64	0.978	5.06518e-35
DSG1	2.82058e-38	1.1673	1	0.955	4.16176e-34
SLC16A9	3.35622e-38	0.937365	0.884	0.274	4.9521e-34
BTG3	5.15601e-38	1.06261	0.93	0.362	7.60769e-34
CAPNS2	1.14261e-37	0.950854	0.965	0.352	1.68593e-33
IGKC	1.76426e-37	-4.05936	1	1	2.60316e-33
NFE2L2	1.95364e-37	1.19042	1	0.633	2.8826e-33
NSG1	2.3404e-37	1.066	0.942	0.377	3.45327e-33
POU3F1	3.82319e-37	0.677332	0.698	0.144	5.64112e-33
AKR1B10	6.07789e-37	1.04382	0.977	0.382	8.96792e-33
ALAD	4.13522e-36	0.8773	0.86	0.253	6.10151e-32
CD44	4.72343e-36	0.972048	1	0.92	6.96942e-32
GJA1	8.62192e-36	1.29372	1	0.806	1.27216e-31
DEGS1	1.36611e-35	0.94914	0.977	0.343	2.01569e-31
IMPA2	4.60331e-35	1.01068	0.977	0.42	6.79219e-31
SH3RF2	5.83416e-35	0.990447	0.965	0.393	8.60831e-31
IGHG2	7.49051e-35	-4.37129	0.105	0.825	1.10523e-30
RALGPS2	1.11983e-34	0.801288	0.802	0.225	1.65231e-30
TXN	1.22374e-34	0.962995	1	0.921	1.80563e-30
COL3A1	1.48483e-34	-3.87241	0.733	0.945	2.19086e-30
INAVA	3.28487e-34	0.774799	0.907	0.292	4.84682e-30
SPARC	4.14381e-34	-3.95264	0.105	0.814	6.11419e-30
MAPT	5.03986e-34	0.823403	0.826	0.23	7.43631e-30
COL1A2	5.11438e-34	-3.83838	0.919	0.988	7.54627e-30
HES5	7.34786e-34	0.537184	0.547	0.091	1.08418e-29
MYC	7.5831e-34	1.24577	1	0.816	1.11889e-29
COL1A1	1.74612e-33	-4.03188	0.709	0.939	2.5764e-29
VIM	1.81998e-33	-2.62984	0.081	0.799	2.68538e-29
IGSF3	1.83513e-33	0.783888	0.884	0.27	2.70774e-29
TPD52	2.20731e-33	0.728484	0.86	0.256	3.25689e-29
ZNF385A	2.45959e-33	0.977327	0.942	0.418	3.62913e-29
PON2	2.88985e-33	0.911843	0.814	0.262	4.26398e-29
LTB4R	3.397e-33	0.976448	1	0.62	5.01228e-29
AHNAK2	3.51761e-33	0.943787	0.977	0.477	5.19023e-29
DBI	5.25319e-33	1.01128	1	0.811	7.75108e-29
CA12	5.84245e-33	0.994638	0.919	0.364	8.62053e-29
CTNNBIP1	6.87152e-33	0.917005	1	0.836	1.01389e-28
KRT76	8.41317e-33	1.82866	1	1	1.24136e-28
KRT4	1.16601e-32	-2.98922	0.081	0.806	1.72045e-28
PLCH2	1.3026e-32	0.876679	0.849	0.281	1.92198e-28
NMU	1.58151e-32	0.754216	0.767	0.207	2.33352e-28
SEMA4B	1.74934e-32	1.03351	0.977	0.45	2.58115e-28
IGSF8	2.11567e-32	0.776651	0.837	0.255	3.12166e-28
VLDLR	3.12142e-32	0.747354	0.779	0.215	4.60565e-28
LAD1	4.26852e-32	0.984725	0.988	0.695	6.29819e-28
STK39	4.43457e-32	0.745447	0.744	0.199	6.54321e-28
AQP3	6.28389e-32	0.949341	1	0.958	9.27187e-28
IGHA1	6.35132e-32	-3.65529	0.093	0.79	9.37138e-28
ZBTB7B	9.75869e-32	0.892765	0.953	0.425	1.4399e-27
CRNN	1.091e-31	-2.77033	0.186	0.855	1.60978e-27
TIAM1	1.91502e-31	0.640767	0.756	0.196	2.82561e-27
LY6D	3.234e-31	0.978851	1	0.886	4.77177e-27
THBD	3.29123e-31	1.06224	0.942	0.428	4.85621e-27
FAM83B	5.21615e-31	0.950586	0.86	0.326	7.69642e-27
KLF8	6.00552e-31	0.686178	0.733	0.198	8.86114e-27
ZNF750	1.13824e-30	0.947326	0.977	0.445	1.67947e-26
LONRF1	1.2519e-30	0.794694	0.767	0.229	1.84718e-26
ABCC5	1.54837e-30	0.85751	0.919	0.346	2.28462e-26
EFNA3	1.62185e-30	0.778368	0.802	0.251	2.39305e-26
ARAP2	2.01953e-30	0.646496	0.744	0.199	2.97982e-26
ANKRD35	2.51876e-30	1.00978	0.895	0.358	3.71643e-26
SERPINB5	2.88891e-30	0.985129	0.988	0.598	4.26259e-26
NECTIN1	3.26656e-30	0.918572	0.988	0.621	4.81981e-26
RGS12	3.42237e-30	0.704153	0.907	0.297	5.04971e-26
DCN	4.49523e-30	-2.36589	0.174	0.81	6.63272e-26
ARL4D	6.18877e-30	0.683316	0.814	0.241	9.13153e-26
TLCD3A	1.2745e-29	0.74937	0.767	0.232	1.88052e-25
CELSR2	1.34401e-29	0.750666	0.849	0.284	1.98309e-25
EFNA1	1.40381e-29	0.717686	0.721	0.201	2.07132e-25
CRCT1	1.78985e-29	-2.51133	0.105	0.777	2.64092e-25
AKR1C2	1.81883e-29	0.716976	0.64	0.155	2.68368e-25
EPHB6	3.8012e-29	0.686138	0.733	0.205	5.60867e-25
MYH14	4.64709e-29	1.00959	0.988	0.601	6.85678e-25
DSC2	6.54706e-29	0.850925	1	0.957	9.66019e-25
HS3ST6	7.08258e-29	0.690335	0.709	0.189	1.04504e-24
RHOV	7.19593e-29	0.939994	0.907	0.403	1.06176e-24
C10orf99	7.53723e-29	0.884647	0.779	0.254	1.11212e-24
PTPRF	9.14124e-29	0.954161	0.93	0.424	1.34879e-24
MFSD2A	9.38956e-29	0.561767	0.64	0.147	1.38543e-24
FAM83C	1.24071e-28	0.703338	0.733	0.205	1.83067e-24
FAM83G	1.58538e-28	0.947941	0.977	0.489	2.33923e-24
TUBB2A	1.63362e-28	1.02754	0.977	0.532	2.41041e-24
KLF5	1.69358e-28	0.891798	1	0.723	2.49887e-24
EMP2	2.07624e-28	0.799095	0.895	0.362	3.06349e-24
NQO1	2.69453e-28	0.627766	0.674	0.173	3.97578e-24
RANGAP1	3.12846e-28	0.704906	0.907	0.337	4.61604e-24
COL6A2	3.63131e-28	-1.92548	0.023	0.71	5.358e-24
TMEM154	4.70614e-28	0.721646	0.849	0.288	6.94391e-24
JUP	4.87934e-28	0.787689	1	0.978	7.19946e-24
CYB5A	6.40634e-28	0.579877	0.698	0.182	9.45256e-24
SLC39A6	7.27163e-28	0.655109	0.709	0.19	1.07293e-23
ALDH2	7.34789e-28	0.876415	0.919	0.364	1.08418e-23
RAB3D	8.61768e-28	0.809519	0.895	0.377	1.27154e-23
IGHG1	1.12461e-27	-2.93547	0.023	0.708	1.65937e-23
SLC47A2	1.14325e-27	0.802554	0.872	0.317	1.68686e-23
IGLC1	1.20674e-27	-3.15942	0.047	0.711	1.78055e-23
SLC38A2	1.39541e-27	0.858274	0.942	0.404	2.05893e-23
DYNC1LI1	1.54502e-27	0.558549	0.581	0.128	2.27967e-23
TMEM14A	1.65814e-27	0.620468	0.663	0.17	2.44659e-23
SGK1	1.86435e-27	0.915314	0.988	0.711	2.75084e-23
SREBF2	3.0486e-27	0.647651	0.837	0.275	4.49821e-23
COL6A1	3.22222e-27	-1.8821	0.07	0.725	4.75439e-23
FOXN1	4.42543e-27	0.474357	0.5	0.095	6.52973e-23
SPINT2	4.77604e-27	0.811263	1	0.735	7.04704e-23
TMEM165	4.91533e-27	0.806035	0.907	0.394	7.25256e-23
FABP5	6.12429e-27	0.867036	1	0.993	9.0364e-23
IRF6	8.62933e-27	0.767324	0.884	0.364	1.27326e-22
FAM160A1	9.38749e-27	0.526648	0.663	0.166	1.38512e-22
KCTD15	1.44642e-26	0.641304	0.837	0.275	2.13419e-22
NUPR1	1.75291e-26	0.859347	0.953	0.5	2.58641e-22
HAS3	2.29959e-26	0.570511	0.593	0.141	3.39305e-22
FXYD3	3.41344e-26	0.808185	0.988	0.49	5.03653e-22
TPPP3	5.14286e-26	1.12417	0.802	0.345	7.58829e-22
LGR4	5.16485e-26	0.8146	0.86	0.321	7.62073e-22
FGFR3	5.26366e-26	0.753906	0.965	0.379	7.76652e-22
BNIPL	5.31555e-26	0.787515	0.907	0.381	7.84309e-22
P2RY1	5.97256e-26	0.652265	0.767	0.241	8.81252e-22
IGFBP4	7.60146e-26	-1.85525	0.035	0.682	1.12159e-21
TFAP2A	8.07377e-26	0.750184	0.86	0.344	1.19128e-21
ZBTB7C	8.17893e-26	0.701745	0.895	0.345	1.2068e-21
MPZL2	8.87077e-26	0.873936	0.988	0.635	1.30888e-21
ATL2	9.18215e-26	0.627099	0.744	0.229	1.35483e-21
RAPGEFL1	9.87789e-26	0.805738	0.884	0.408	1.45748e-21
STAP2	9.88286e-26	0.663332	0.802	0.271	1.45822e-21
P2RY2	1.1693e-25	0.673147	0.802	0.265	1.7253e-21
TFAP2C	1.21684e-25	0.612365	0.744	0.22	1.79545e-21
HSPB1	1.33206e-25	0.679893	1	0.999	1.96546e-21
NAA50	1.45827e-25	0.610089	0.849	0.288	2.15167e-21
GAN	1.55842e-25	0.55174	0.698	0.194	2.29945e-21
SOX21	2.28733e-25	0.768447	0.791	0.279	3.37496e-21
CTNND1	2.56488e-25	0.733038	0.988	0.813	3.78448e-21
MAF	3.35486e-25	0.721004	1	0.892	4.95009e-21
KIFC2	3.40469e-25	0.685738	0.791	0.27	5.02361e-21
EXPH5	3.73031e-25	0.711769	0.837	0.318	5.50408e-21
BLCAP	3.77281e-25	0.64946	0.86	0.299	5.56678e-21
TSTA3	4.18981e-25	0.591833	0.744	0.226	6.18207e-21
AMD1	5.77858e-25	0.573754	0.686	0.2	8.52629e-21
FOXE1	6.1242e-25	0.769968	0.895	0.385	9.03626e-21
NRARP	6.598e-25	0.950355	0.779	0.29	9.73535e-21
TACC2	6.85059e-25	0.75489	0.953	0.447	1.0108e-20
GRHL2	8.2953e-25	0.685187	0.826	0.293	1.22397e-20
FAT2	9.40461e-25	0.798597	0.884	0.38	1.38765e-20
FAM110C	1.40387e-24	0.710155	0.791	0.263	2.07141e-20
THEM5	1.64663e-24	0.721231	0.686	0.198	2.4296e-20
PGM2	1.68848e-24	0.591534	0.767	0.245	2.49135e-20
SERBP1	1.70953e-24	0.741645	0.988	0.809	2.52241e-20
HRAS	1.74527e-24	0.654495	0.895	0.349	2.57514e-20
CLCA2	1.81898e-24	0.721551	0.907	0.367	2.6839e-20
CLEC2B	1.9905e-24	0.624745	0.779	0.246	2.93699e-20
HSPA1B	2.04451e-24	0.841674	1	0.726	3.01667e-20
IGFBP5	2.05251e-24	-1.84893	0.326	0.812	3.02848e-20
EPHX2	2.13126e-24	0.657172	0.674	0.197	3.14467e-20
TSPO	3.52443e-24	0.70824	1	0.742	5.2003e-20
SYTL1	4.6955e-24	0.787515	0.977	0.429	6.92821e-20
ANKRD22	5.02927e-24	0.458634	0.57	0.132	7.42068e-20
S100A4	5.07716e-24	-1.40821	0.047	0.66	7.49135e-20
SLC9A3R1	6.05706e-24	0.77848	0.977	0.748	8.9372e-20
DENND4C	6.23706e-24	0.549267	0.709	0.211	9.20279e-20
SGMS1	7.03025e-24	0.588206	0.663	0.192	1.03731e-19
SLC22A23	7.08253e-24	0.70697	0.756	0.276	1.04503e-19
MYCBP2	7.61745e-24	0.567733	0.674	0.196	1.12396e-19
SLC9A3	9.30336e-24	0.746661	0.721	0.247	1.37271e-19
SPRR2D	9.75872e-24	-2.1232	0.372	0.861	1.4399e-19
GBP6	1.08695e-23	0.911106	0.977	0.62	1.60379e-19
STXBP5	1.17687e-23	0.601338	0.814	0.288	1.73648e-19
PTGR1	1.31142e-23	0.761042	0.802	0.315	1.93501e-19
PERP	1.36847e-23	0.705901	1	0.982	2.01918e-19
ITM2B	1.46279e-23	0.498229	1	1	2.15834e-19
CARMIL3	1.67997e-23	0.354312	0.291	0.035	2.47879e-19
REEP4	1.78057e-23	0.64475	0.802	0.296	2.62723e-19
UBC	1.78456e-23	0.586529	1	1	2.63312e-19
KLK11	1.91129e-23	1.01341	0.942	0.656	2.82011e-19
UNC13B	2.0127e-23	0.568061	0.651	0.186	2.96974e-19
INPP5J	2.24184e-23	0.399219	0.372	0.06	3.30783e-19
ACSL1	2.31896e-23	0.491435	0.651	0.18	3.42162e-19
ESRP2	3.02504e-23	0.696067	0.767	0.283	4.46345e-19
FAM110A	3.044e-23	0.593261	0.698	0.217	4.49142e-19
ANXA7	3.11163e-23	0.731388	0.872	0.379	4.59121e-19
GTF2IRD1	3.40716e-23	0.589811	0.779	0.262	5.02726e-19
ABCA7	4.22281e-23	0.627563	0.779	0.279	6.23075e-19
NAGK	4.2737e-23	0.763429	0.895	0.419	6.30584e-19
IL17RE	4.37658e-23	0.513281	0.547	0.136	6.45764e-19
CDC42BPG	4.50265e-23	0.688406	0.826	0.32	6.64366e-19
CEBPA	4.54221e-23	0.783859	0.802	0.307	6.70203e-19
SLC6A9	4.63016e-23	0.757415	0.709	0.246	6.8318e-19
LIN7C	6.31028e-23	0.526857	0.64	0.181	9.31082e-19
PARD6G	8.3185e-23	0.59502	0.802	0.281	1.22739e-18
VAV3	9.43418e-23	0.733166	0.837	0.338	1.39201e-18
ALDH3B2	1.26635e-22	0.671902	0.709	0.236	1.8685e-18
FASN	1.60275e-22	0.621131	0.872	0.34	2.36486e-18
CAMSAP3	1.70025e-22	0.61042	0.709	0.227	2.50872e-18
GSDMC	2.25308e-22	0.599483	0.756	0.261	3.32442e-18
CLIP4	2.3073e-22	0.6243	0.814	0.294	3.40443e-18
MBD2	2.59208e-22	0.695223	0.93	0.469	3.82462e-18
CBR3	2.6069e-22	0.362918	0.337	0.051	3.84648e-18
NEFL	3.14204e-22	0.617554	0.616	0.176	4.63608e-18
NOTCH3	3.29788e-22	0.652585	0.86	0.355	4.86602e-18
CBR1	3.51095e-22	0.863298	0.988	0.637	5.18041e-18
PLEKHN1	3.71704e-22	0.572594	0.744	0.244	5.48449e-18
FAM83H	3.9966e-22	0.704177	0.942	0.453	5.89698e-18
PLXNB1	4.02523e-22	0.799213	0.919	0.436	5.93922e-18
DHCR24	4.68911e-22	0.754211	0.919	0.424	6.91878e-18
SS18	5.23399e-22	0.541254	0.663	0.199	7.72275e-18
AACS	5.70173e-22	0.621984	0.791	0.288	8.4129e-18
ABCA12	5.78194e-22	0.802116	0.698	0.241	8.53125e-18
ACAP3	6.17577e-22	0.726566	0.988	0.598	9.11235e-18
EIF6	6.3387e-22	0.725188	0.895	0.46	9.35276e-18
POLR2A	6.78698e-22	0.65059	0.907	0.413	1.00142e-17
HK1	8.34439e-22	0.675519	0.919	0.449	1.23121e-17
STARD10	8.67008e-22	0.574256	0.709	0.235	1.27927e-17
OXCT1	9.78459e-22	0.491418	0.535	0.135	1.44372e-17
CHP2	1.10895e-21	0.327995	0.209	0.018	1.63625e-17
PITPNA	1.30292e-21	0.752734	0.977	0.655	1.92246e-17
AFF1	1.33105e-21	0.567009	0.756	0.256	1.96397e-17
TNNT3	1.43666e-21	0.360199	0.337	0.053	2.1198e-17
CHL1	1.47068e-21	0.507723	0.628	0.183	2.16999e-17
SPRR2A	1.52126e-21	-1.64751	0.779	0.977	2.24462e-17
ADH7	1.53562e-21	0.502874	0.57	0.153	2.26581e-17
MAP7	1.54345e-21	0.595573	0.849	0.329	2.27736e-17
MAL	1.65073e-21	-2.12638	0.128	0.684	2.43565e-17
LRRC4	1.74028e-21	0.408397	0.36	0.062	2.56779e-17
HR	1.98001e-21	0.473198	0.628	0.177	2.92151e-17
SPPL3	2.28498e-21	0.528003	0.733	0.241	3.37149e-17
KLF10	2.40187e-21	0.705468	0.791	0.31	3.54396e-17
PCOLCE	2.66648e-21	-1.63596	0.047	0.61	3.93439e-17
ZNF219	3.0757e-21	0.544441	0.814	0.284	4.53819e-17
NUDT8	3.10305e-21	0.449121	0.465	0.104	4.57855e-17
AFF4	3.4261e-21	0.513027	0.721	0.241	5.05522e-17
C1R	3.46296e-21	-1.6755	0.058	0.618	5.1096e-17
RETSAT	3.4733e-21	0.560989	0.721	0.246	5.12485e-17
ICK	3.65847e-21	0.385786	0.384	0.071	5.39808e-17
PTGDS	3.76108e-21	-1.81011	0.07	0.636	5.54947e-17
EFS	4.25046e-21	0.594159	0.814	0.308	6.27155e-17
IL20RB	4.39555e-21	0.696361	0.814	0.349	6.48564e-17
LRATD1	4.52803e-21	0.723482	0.814	0.332	6.68111e-17
PLD1	4.63525e-21	0.502601	0.558	0.151	6.83931e-17
CXCL12	4.99139e-21	-1.76201	0.012	0.585	7.36479e-17
RIPK4	5.34176e-21	0.549936	0.756	0.261	7.88177e-17
LMO4	5.64857e-21	0.870601	0.919	0.498	8.33446e-17
PPFIA3	8.38253e-21	0.367144	0.395	0.076	1.23684e-16
PRKX	8.49896e-21	0.675784	0.779	0.318	1.25402e-16
SPINK7	8.93277e-21	-1.96437	0.116	0.689	1.31803e-16
CUX1	9.40823e-21	0.627318	0.849	0.361	1.38818e-16
BCL11A	9.70872e-21	0.595487	0.709	0.241	1.43252e-16
EBPL	9.97379e-21	0.653304	0.884	0.391	1.47163e-16
MX1	1.03308e-20	0.683549	0.884	0.411	1.52431e-16
TNFRSF19	1.05786e-20	0.694405	0.686	0.238	1.56087e-16
PLA2R1	1.20385e-20	0.58181	0.686	0.228	1.77629e-16
PRNP	1.29899e-20	0.593184	0.895	0.384	1.91666e-16
ITPRIP	1.35618e-20	0.540062	0.628	0.195	2.00104e-16
ZDHHC5	1.3885e-20	0.602791	0.802	0.327	2.04873e-16
LMAN2	1.56876e-20	0.617151	0.872	0.379	2.3147e-16
ADRB2	1.81768e-20	0.680366	0.744	0.284	2.68199e-16
HNRNPAB	1.87109e-20	0.670951	0.953	0.501	2.7608e-16
EEF1B2	2.03581e-20	0.7011	0.953	0.527	3.00384e-16
C2CD4D	2.04905e-20	0.280481	0.256	0.031	3.02337e-16
TRPS1	2.23614e-20	0.653967	0.988	0.51	3.29942e-16
SDC4	2.26103e-20	0.61265	0.814	0.324	3.33615e-16
VPS53	2.49223e-20	0.544476	0.802	0.308	3.67728e-16
ATP10D	3.27977e-20	0.52877	0.663	0.212	4.8393e-16
CDH1	3.56329e-20	0.694405	0.884	0.406	5.25764e-16
FOXN3	3.91261e-20	0.575955	0.767	0.279	5.77306e-16
ALDH3A1	4.02451e-20	0.761909	0.977	0.571	5.93817e-16
PRXL2A	4.30387e-20	0.670016	0.709	0.264	6.35036e-16
ALDH9A1	4.36638e-20	0.597438	0.744	0.278	6.4426e-16
TSPAN14	4.73966e-20	0.592089	0.837	0.336	6.99337e-16
JAG1	5.00992e-20	0.816637	0.895	0.459	7.39213e-16
TOM1L2	5.42173e-20	0.492858	0.756	0.267	7.99976e-16
FZD6	5.6798e-20	0.528327	0.605	0.184	8.38055e-16
BAG1	5.99715e-20	0.612155	0.977	0.478	8.8488e-16
NECTIN4	7.6762e-20	0.738092	0.895	0.481	1.13262e-15
ITPR2	7.74304e-20	0.611665	0.721	0.262	1.14248e-15
MKNK2	8.04847e-20	0.630871	0.965	0.586	1.18755e-15
DVL1	9.04562e-20	0.537199	0.791	0.303	1.33468e-15
GSTP1	9.59501e-20	0.564538	1	0.976	1.41574e-15
SEMA3F	9.80125e-20	0.692386	0.872	0.449	1.44617e-15
SGPP2	9.93533e-20	0.467474	0.5	0.13	1.46596e-15
PGD	1.04711e-19	0.600443	0.988	0.682	1.54501e-15
MPP7	1.09281e-19	0.613723	0.767	0.303	1.61245e-15
SUSD4	1.61035e-19	0.457401	0.535	0.145	2.37606e-15
SRD5A3	1.69742e-19	0.359069	0.384	0.077	2.50454e-15
KCTD1	1.75034e-19	0.484663	0.651	0.208	2.58263e-15
PTEN	1.79836e-19	0.532942	0.593	0.181	2.65348e-15
CPEB2	1.83016e-19	0.745761	0.849	0.439	2.70041e-15
MPST	1.91154e-19	0.528128	0.802	0.305	2.82048e-15
CBLC	1.96901e-19	0.580325	0.605	0.198	2.90527e-15
ID2	2.21742e-19	0.630205	0.802	0.357	3.27181e-15
GPCPD1	2.24795e-19	0.632657	0.837	0.362	3.31685e-15
PLPP2	2.35602e-19	0.483096	0.523	0.144	3.47631e-15
LIMK2	2.37145e-19	0.482759	0.686	0.226	3.49907e-15
RHBDF2	2.47773e-19	0.58967	0.593	0.189	3.65588e-15
FBLN1	2.60738e-19	-1.3886	0.058	0.586	3.84719e-15
DLX5	2.9818e-19	0.584804	0.64	0.224	4.39964e-15
MINK1	4.15273e-19	0.636584	0.953	0.579	6.12736e-15
WNT2B	4.18015e-19	0.522082	0.465	0.118	6.16781e-15
SLC43A2	4.35268e-19	0.369808	0.372	0.074	6.42238e-15
PLA2G12A	4.37724e-19	0.469445	0.628	0.196	6.45862e-15
NOTCH2	4.58494e-19	0.518978	0.756	0.279	6.76508e-15
PPP1R14C	4.78136e-19	0.61965	0.802	0.333	7.0549e-15
LUM	4.94991e-19	-1.5375	0.023	0.563	7.30359e-15
VSNL1	5.11232e-19	0.562924	0.733	0.267	7.54322e-15
FAM3B	6.31286e-19	0.493822	0.57	0.168	9.31463e-15
TOB2	7.00667e-19	0.578521	0.767	0.312	1.03383e-14
AEBP1	8.25262e-19	-1.50739	0.035	0.56	1.21767e-14
NEBL	8.40531e-19	0.531448	0.698	0.251	1.2402e-14
PRAG1	8.54605e-19	0.451254	0.523	0.143	1.26097e-14
TRIM7	9.22879e-19	0.443549	0.593	0.179	1.36171e-14
STX6	9.84636e-19	0.549056	0.663	0.237	1.45283e-14
FKBP1A	1.04156e-18	0.540389	0.791	0.317	1.53683e-14
FARP2	1.14805e-18	0.476313	0.581	0.177	1.69395e-14
PROM2	1.18345e-18	0.640501	0.93	0.497	1.74619e-14
LPAR6	1.27112e-18	0.671439	0.779	0.323	1.87554e-14
ACTB	1.30775e-18	-0.668586	1	0.997	1.92959e-14
ATG16L2	1.32462e-18	0.506778	0.651	0.222	1.95447e-14
CLUH	1.41445e-18	0.505268	0.721	0.243	2.08702e-14
INKA1	1.41462e-18	0.319554	0.302	0.05	2.08727e-14
RAB40C	1.42016e-18	0.420633	0.5	0.134	2.09545e-14
XBP1	1.45063e-18	-1.37037	0.198	0.676	2.14041e-14
ORMDL1	1.48448e-18	0.506346	0.733	0.263	2.19035e-14
FRAT2	1.56211e-18	0.44554	0.488	0.127	2.3049e-14
TTC39C	1.63637e-18	0.474657	0.57	0.174	2.41447e-14
RRAGD	1.64496e-18	0.446542	0.43	0.103	2.42714e-14
CLTB	1.73146e-18	0.579561	1	0.899	2.55478e-14
GNAI1	1.73853e-18	0.412504	0.535	0.148	2.56521e-14
TP63	1.7476e-18	0.656449	0.942	0.492	2.57859e-14
SMPD2	1.92883e-18	0.474117	0.616	0.199	2.846e-14
ACVR1B	2.028e-18	0.416293	0.465	0.117	2.99231e-14
PAIP2	2.04727e-18	0.507213	0.698	0.25	3.02074e-14
ARHGEF4	2.04837e-18	0.69218	0.919	0.515	3.02237e-14
IGFBP7	2.13038e-18	-1.37212	0.023	0.544	3.14337e-14
TENT5B	2.43866e-18	0.61957	0.779	0.33	3.59825e-14
CRYBG2	2.52541e-18	0.44437	0.593	0.178	3.72624e-14
DCXR	2.54182e-18	0.531033	0.651	0.227	3.75046e-14
SMARCA4	2.55209e-18	0.480626	0.721	0.252	3.76561e-14
KRT13	2.64726e-18	-1.44415	0.895	0.982	3.90603e-14
MYCL	2.76033e-18	0.52161	0.616	0.203	4.07287e-14
KTN1	3.10534e-18	0.59654	0.895	0.421	4.58194e-14
JARID2	3.24958e-18	0.516715	0.733	0.272	4.79476e-14
SCIN	3.4579e-18	0.429963	0.395	0.088	5.10213e-14
TNNT2	3.61887e-18	0.431521	0.477	0.124	5.33965e-14
CNFN	4.10229e-18	-1.72949	0.453	0.871	6.05293e-14
TOLLIP	4.12963e-18	0.602614	0.86	0.41	6.09327e-14
ZC3H15	4.80556e-18	0.425745	0.593	0.18	7.0906e-14
MAFB	4.90274e-18	0.64578	0.907	0.445	7.234e-14
TRPV3	5.20986e-18	0.533124	0.57	0.177	7.68715e-14
PIK3C2G	5.89389e-18	0.487361	0.419	0.101	8.69643e-14
PAPLN	6.25975e-18	0.383618	0.5	0.133	9.23626e-14
MIOS	7.02249e-18	0.429702	0.57	0.169	1.03617e-13
SDC1	7.39015e-18	0.58644	1	0.93	1.09042e-13
ACACA	7.67088e-18	0.46595	0.616	0.202	1.13184e-13
RORA	7.83509e-18	0.583856	0.837	0.356	1.15607e-13
BCO1	7.86464e-18	0.312732	0.302	0.052	1.16043e-13
TIMP2	8.64151e-18	-1.16426	0.035	0.542	1.27505e-13
CKB	9.42796e-18	0.53698	0.686	0.25	1.3911e-13
TMEM189	9.54016e-18	0.488963	0.709	0.26	1.40765e-13
SRC	9.71894e-18	0.46046	0.686	0.244	1.43403e-13
TTC22	9.74223e-18	0.491933	0.686	0.249	1.43747e-13
DDR1	9.80697e-18	0.615344	0.93	0.496	1.44702e-13
ZNF655	9.89421e-18	0.462464	0.616	0.202	1.45989e-13
NLRP1	1.02968e-17	0.571052	0.733	0.291	1.5193e-13
GPX2	1.05428e-17	0.440762	0.512	0.144	1.55559e-13
BAG3	1.16759e-17	0.50194	0.756	0.292	1.72278e-13
PALLD	1.18386e-17	0.610989	0.919	0.489	1.74678e-13
BCAP31	1.23854e-17	0.539616	0.872	0.389	1.82747e-13
HPS4	1.26014e-17	0.471085	0.616	0.205	1.85934e-13
CNKSR1	1.33958e-17	0.503127	0.628	0.22	1.97655e-13
KANK1	1.37259e-17	0.620914	0.651	0.244	2.02525e-13
OAS1	1.42809e-17	0.476176	0.686	0.243	2.10714e-13
IVNS1ABP	1.44924e-17	0.64047	0.93	0.526	2.13835e-13
WNT7B	1.50137e-17	0.490936	0.581	0.186	2.21527e-13
RALGAPA1	1.54655e-17	0.493728	0.628	0.215	2.28194e-13
CITED4	1.61386e-17	0.499459	0.884	0.381	2.38126e-13
WWP1	1.62629e-17	0.466453	0.628	0.209	2.3996e-13
ERBB2	1.65286e-17	0.612628	0.849	0.417	2.4388e-13
PROS1	1.70333e-17	0.367273	0.407	0.094	2.51326e-13
DYNC1H1	1.90203e-17	0.573924	0.895	0.44	2.80645e-13
NCOA4	1.93659e-17	0.510669	0.698	0.256	2.85744e-13
GPC1	1.96762e-17	0.620405	0.953	0.504	2.90322e-13
FBN1	2.10123e-17	-1.26895	0.035	0.538	3.10037e-13
PLP2	2.10277e-17	0.628068	0.884	0.442	3.10264e-13
VPS13D	2.24861e-17	0.470701	0.698	0.251	3.31782e-13
PAQR5	2.39789e-17	0.411158	0.395	0.092	3.53808e-13
S100A9	2.66966e-17	-1.1427	1	1	3.93909e-13
ARHGAP32	2.68764e-17	0.56282	0.686	0.261	3.96562e-13
DYNLT3	2.71776e-17	0.503451	0.756	0.29	4.01005e-13
PLEKHF2	3.19531e-17	0.408131	0.5	0.141	4.71469e-13
SLC12A6	3.47393e-17	0.395561	0.535	0.157	5.12578e-13
CIZ1	3.52029e-17	0.452584	0.593	0.194	5.19419e-13
TMEM9B	3.54525e-17	0.456649	0.64	0.223	5.23102e-13
COL6A3	3.71718e-17	-1.17745	0.023	0.52	5.48469e-13
ATAD2B	3.75343e-17	0.418684	0.593	0.187	5.53818e-13
RBM33	4.16518e-17	0.480183	0.663	0.239	6.14573e-13
SORL1	4.27801e-17	0.434181	0.535	0.161	6.31221e-13
ERBB3	4.64082e-17	0.495976	0.767	0.304	6.84753e-13
EXOC3	4.92314e-17	0.507565	0.802	0.326	7.26409e-13
PKP3	5.09302e-17	0.637803	0.953	0.696	7.51476e-13
CNTN1	5.38643e-17	0.369894	0.419	0.102	7.94767e-13
TUBGCP4	6.56029e-17	0.307858	0.326	0.063	9.6797e-13
RB1	6.7707e-17	0.450203	0.744	0.273	9.99017e-13
HOOK1	7.27488e-17	0.476735	0.651	0.235	1.07341e-12
BDH1	7.6483e-17	0.503302	0.791	0.313	1.12851e-12
EEF1G	7.65184e-17	0.590231	1	0.921	1.12903e-12
CCDC47	7.72976e-17	0.541468	0.837	0.379	1.14053e-12
AP1G2	8.17708e-17	0.513171	0.744	0.293	1.20653e-12
PGRMC2	8.54512e-17	0.555408	0.826	0.377	1.26083e-12
SLAIN2	8.77465e-17	0.457117	0.698	0.256	1.2947e-12
MAP3K6	9.22529e-17	0.511986	0.779	0.312	1.36119e-12
ZNF276	9.25392e-17	0.516715	0.698	0.268	1.36542e-12
AKR1C1	9.46277e-17	0.379062	0.36	0.079	1.39623e-12
NDUFA10	9.71406e-17	0.493941	0.686	0.258	1.43331e-12
EIF4A1	9.81621e-17	0.529548	1	0.888	1.44838e-12
GRTP1	1.00047e-16	0.368665	0.453	0.119	1.4762e-12
MMP2	1.07543e-16	-1.37879	0.012	0.501	1.58679e-12
LSS	1.09087e-16	0.506778	0.744	0.29	1.60958e-12
HDHD3	1.0961e-16	0.460445	0.512	0.155	1.6173e-12
FERMT1	1.10489e-16	0.417189	0.593	0.189	1.63026e-12
HNRNPUL2	1.11039e-16	0.570971	0.977	0.537	1.63838e-12
ABCA5	1.2389e-16	0.43284	0.57	0.183	1.82799e-12
KIF5B	1.37625e-16	0.533277	0.872	0.399	2.03066e-12
ENAH	1.49282e-16	0.544513	0.686	0.272	2.20266e-12
UNC45A	1.66596e-16	0.419185	0.605	0.2	2.45812e-12
PDLIM4	1.69693e-16	0.550864	0.674	0.271	2.50382e-12
NCKAP1	1.91141e-16	0.568112	0.988	0.634	2.82029e-12
ADAM15	1.98592e-16	0.492226	0.721	0.282	2.93022e-12
HORMAD1	2.00846e-16	0.461983	0.674	0.238	2.96348e-12
IPPK	2.04081e-16	0.505801	0.802	0.344	3.01122e-12
PTPN13	2.08136e-16	0.62145	0.814	0.388	3.07104e-12
NXF1	2.17708e-16	0.539644	0.837	0.376	3.21228e-12
TMEM134	2.18235e-16	0.55054	0.849	0.399	3.22006e-12
MARK3	2.1843e-16	0.517005	0.814	0.354	3.22293e-12
MAL2	2.18475e-16	0.649845	0.907	0.476	3.22359e-12
MLLT1	2.2991e-16	0.490695	0.674	0.25	3.39232e-12
KRT75	2.39203e-16	0.497335	0.291	0.054	3.52944e-12
GATAD2A	2.45145e-16	0.526282	0.767	0.332	3.61712e-12
METAP2	2.55955e-16	0.51733	0.674	0.253	3.77661e-12
RAB25	2.59999e-16	0.642669	0.837	0.399	3.83628e-12
NDRG4	2.65953e-16	0.509344	0.581	0.201	3.92414e-12
PPP2R2C	2.72113e-16	0.418667	0.5	0.149	4.01503e-12
PUM2	2.73187e-16	0.492727	0.651	0.239	4.03087e-12
ALS2CL	2.79989e-16	0.570272	0.802	0.375	4.13124e-12
BICDL1	2.8855e-16	0.490788	0.581	0.2	4.25755e-12
TPD52L1	2.9433e-16	0.494039	0.721	0.284	4.34283e-12
MDH2	3.09005e-16	0.496967	0.733	0.296	4.55937e-12
CUL4A	3.26517e-16	0.508599	0.756	0.318	4.81776e-12
BSPRY	3.32686e-16	0.452056	0.57	0.184	4.90878e-12
PTPRE	3.5381e-16	0.518555	0.558	0.195	5.22047e-12
STIM1	3.61303e-16	0.482826	0.756	0.303	5.33103e-12
ZNF57	3.61364e-16	0.267061	0.233	0.034	5.33192e-12
CD74	3.64873e-16	-1.44784	0.128	0.592	5.3837e-12
ANXA1	3.82291e-16	-1.354	0.988	0.989	5.6407e-12
ARRDC3	3.84786e-16	0.738322	0.826	0.441	5.67751e-12
IGF1R	3.8555e-16	0.500516	0.628	0.228	5.68878e-12
ZNF146	4.06248e-16	0.415546	0.523	0.161	5.99419e-12
GPBP1L1	4.29702e-16	0.477862	0.628	0.23	6.34026e-12
EVPL	4.3295e-16	0.543276	1	0.834	6.38818e-12
PITPNM3	4.56053e-16	0.475609	0.616	0.217	6.72906e-12
ARHGEF37	4.56328e-16	0.430981	0.523	0.165	6.73311e-12
UNC5B	4.88246e-16	0.428511	0.558	0.184	7.20407e-12
AP1S1	5.06495e-16	0.383448	0.512	0.152	7.47333e-12
ANK3	5.40239e-16	0.426508	0.465	0.135	7.97122e-12
IGHG3	5.80411e-16	-2.11905	0.023	0.495	8.56397e-12
G6PD	6.10336e-16	0.453298	0.674	0.254	9.0055e-12
KIAA1522	6.3857e-16	0.553872	0.895	0.42	9.4221e-12
ESRP1	6.57658e-16	0.535134	0.849	0.389	9.70374e-12
ARHGEF28	6.58487e-16	0.520741	0.593	0.22	9.71598e-12
CASP14	6.84815e-16	0.334933	0.326	0.067	1.01044e-11
CASZ1	7.00145e-16	0.447054	0.709	0.265	1.03306e-11
DGCR2	7.05396e-16	0.483876	0.651	0.247	1.04081e-11
EPAS1	7.15721e-16	0.585036	0.651	0.257	1.05605e-11
FSTL1	7.80277e-16	-1.05563	0.012	0.482	1.1513e-11
PCDHB14	8.43344e-16	0.307858	0.314	0.063	1.24435e-11
RNF145	9.56812e-16	0.514921	0.919	0.434	1.41178e-11
CLK1	9.70251e-16	0.562478	0.826	0.395	1.43161e-11
FIBP	1.0126e-15	0.367397	0.442	0.12	1.49409e-11
CADM4	1.01293e-15	0.382375	0.477	0.137	1.49459e-11
MTUS1	1.02951e-15	0.507878	0.64	0.247	1.51904e-11
DIAPH2	1.18107e-15	0.443516	0.616	0.221	1.74266e-11
KREMEN1	1.20361e-15	0.523999	0.791	0.352	1.77593e-11
BOK	1.32978e-15	0.461837	0.593	0.213	1.9621e-11
CXADR	1.33476e-15	0.367397	0.442	0.121	1.96944e-11
ANAPC7	1.35418e-15	0.500644	0.686	0.275	1.99809e-11
WNK1	1.35832e-15	0.545026	0.988	0.754	2.0042e-11
SOX4	1.41875e-15	0.444751	0.756	0.296	2.09336e-11
CROT	1.42882e-15	0.396282	0.442	0.123	2.10823e-11
MAST4	1.52839e-15	0.571946	0.86	0.438	2.25514e-11
RNF126	1.55697e-15	0.526186	0.802	0.368	2.29732e-11
KLF4	1.60773e-15	0.535803	0.977	0.84	2.37221e-11
IKBKE	1.65613e-15	0.381482	0.407	0.107	2.44362e-11
COL16A1	1.67934e-15	-1.00946	0.047	0.506	2.47787e-11
PITHD1	1.71097e-15	0.48761	0.616	0.233	2.52453e-11
DLG1	1.71567e-15	0.521703	0.721	0.296	2.53146e-11
NOP9	1.74915e-15	0.433878	0.674	0.253	2.58087e-11
GJA3	1.80717e-15	0.311076	0.326	0.069	2.66648e-11
FLNB	1.83146e-15	0.489787	0.767	0.316	2.70232e-11
CDKN1A	1.88154e-15	0.667933	0.872	0.476	2.77622e-11
TUFT1	1.96035e-15	0.452273	0.674	0.254	2.89249e-11
ATP11B	2.08521e-15	0.55521	0.791	0.389	3.07672e-11
RNPS1	2.20507e-15	0.4436	0.744	0.289	3.25358e-11
FBXO30	2.2416e-15	0.337582	0.349	0.08	3.30749e-11
LAMP2	2.25953e-15	0.561854	0.791	0.38	3.33394e-11
C1S	2.26211e-15	-1.19132	0.023	0.487	3.33775e-11
CD82	2.26504e-15	0.499361	0.849	0.389	3.34207e-11
MAP3K1	2.27154e-15	0.48726	0.616	0.235	3.35165e-11
NDE1	2.34231e-15	0.48196	0.57	0.201	3.45607e-11
EPN2	2.54191e-15	0.50212	0.779	0.35	3.75059e-11
SMO	2.56058e-15	0.38735	0.465	0.135	3.77814e-11
FN1	2.59128e-15	-1.08102	0.047	0.506	3.82343e-11
RALY	2.60783e-15	0.51524	0.698	0.292	3.84785e-11
TMEM79	2.65226e-15	0.519385	0.698	0.291	3.91341e-11
PPP6R3	2.70244e-15	0.446824	0.581	0.203	3.98746e-11
SYK	2.83656e-15	0.364679	0.384	0.096	4.18534e-11
STAC2	2.99568e-15	0.409764	0.43	0.114	4.42012e-11
CA13	3.08217e-15	0.291765	0.302	0.061	4.54774e-11
HOOK2	3.17513e-15	0.46402	0.605	0.219	4.6849e-11
IDH3A	3.24161e-15	0.448075	0.605	0.221	4.783e-11
HERC6	3.53963e-15	0.410983	0.488	0.151	5.22272e-11
PIK3R2	3.6326e-15	0.421721	0.628	0.222	5.35991e-11
EHBP1L1	3.77079e-15	0.535689	0.942	0.623	5.56381e-11
OTX1	3.88231e-15	0.31643	0.314	0.066	5.72835e-11
PPP2R2B	3.91367e-15	0.278002	0.267	0.048	5.77462e-11
SYNGR2	4.05343e-15	0.531544	0.733	0.328	5.98083e-11
HSPA4L	4.25647e-15	0.399844	0.523	0.167	6.28042e-11
ARPC5L	4.47506e-15	0.464711	0.837	0.384	6.60295e-11
MTSS1	5.04375e-15	0.498273	0.674	0.269	7.44205e-11
DUSP7	5.11115e-15	0.532418	0.733	0.329	7.54151e-11
TMEM43	5.43269e-15	0.50928	0.791	0.351	8.01594e-11
HSD17B4	5.4482e-15	0.444222	0.535	0.18	8.03883e-11
STAMBP	5.82488e-15	0.37621	0.465	0.138	8.59462e-11
TMEM238	5.92992e-15	0.43675	0.651	0.244	8.7496e-11
ANAPC5	6.48871e-15	0.484705	0.837	0.381	9.57409e-11
MARK2	6.59756e-15	0.479861	0.651	0.262	9.7347e-11
GJB5	6.72189e-15	0.398607	0.453	0.134	9.91814e-11
ITGB8	6.92224e-15	0.459875	0.64	0.24	1.02138e-10
UCK2	7.05967e-15	0.359607	0.419	0.115	1.04165e-10
BNC1	7.13347e-15	0.446305	0.57	0.199	1.05254e-10
DGKA	7.56056e-15	0.570475	0.884	0.49	1.11556e-10
DAZAP1	7.62682e-15	0.4311	0.826	0.353	1.12534e-10
NEFM	7.9012e-15	0.443044	0.442	0.13	1.16582e-10
COG4	8.20159e-15	0.40126	0.5	0.157	1.21015e-10
CLEC7A	8.89504e-15	0.454385	0.628	0.237	1.31246e-10
KCNK1	9.32628e-15	0.405374	0.547	0.186	1.37609e-10
JMJD7	9.40946e-15	0.454939	0.756	0.315	1.38837e-10
SAP30L	9.67783e-15	0.410831	0.605	0.217	1.42796e-10
DNER	9.71507e-15	0.253514	0.221	0.034	1.43346e-10
BTAF1	1.00071e-14	0.448667	0.709	0.29	1.47655e-10
PTK6	1.01634e-14	0.433599	0.628	0.235	1.49961e-10
NFIX	1.02164e-14	0.543322	0.779	0.352	1.50743e-10
TTLL12	1.02998e-14	0.469725	0.593	0.219	1.51973e-10
SUPT5H	1.03035e-14	0.461983	0.663	0.258	1.52028e-10
LAPTM4B	1.04579e-14	0.4766	0.57	0.204	1.54307e-10
HSPA8	1.08538e-14	0.539441	1	0.813	1.60148e-10
BICD2	1.09583e-14	0.502454	1	0.757	1.61689e-10
ACADVL	1.20941e-14	0.513878	0.988	0.739	1.78448e-10
LGALS1	1.23181e-14	-0.893971	0	0.443	1.81754e-10
TUBA4A	1.25653e-14	0.604884	0.942	0.741	1.85401e-10
DAXX	1.28219e-14	0.389755	0.581	0.203	1.89188e-10
PSMC5	1.28457e-14	0.460366	0.884	0.403	1.89538e-10
IGHG4	1.29666e-14	-2.08831	0	0.445	1.91322e-10
ADSSL1	1.29993e-14	0.305743	0.337	0.078	1.91805e-10
SH3GL3	1.394e-14	0.352731	0.477	0.142	2.05685e-10
RAB38	1.47079e-14	0.421745	0.523	0.176	2.17015e-10
PLCD1	1.4751e-14	0.437839	0.605	0.224	2.17651e-10
MSX2	1.60071e-14	0.406693	0.384	0.101	2.36184e-10
LAMP1	1.62635e-14	0.474705	1	0.738	2.39968e-10
ZHX1	1.67337e-14	0.402249	0.512	0.167	2.46905e-10
ATP10B	1.71489e-14	0.372477	0.43	0.123	2.53032e-10
COX4I1	1.87652e-14	0.538115	0.977	0.555	2.7688e-10
DIP2B	2.07415e-14	0.441898	0.605	0.227	3.0604e-10
TUT7	2.14724e-14	0.57601	0.826	0.465	3.16826e-10
CBX2	2.14752e-14	0.264278	0.221	0.035	3.16867e-10
MFN2	2.16324e-14	0.443816	0.64	0.246	3.19187e-10
STX4	2.19838e-14	0.429433	0.674	0.262	3.2437e-10
NOP16	2.27986e-14	0.409764	0.488	0.157	3.36393e-10
GIPC1	2.28555e-14	0.509507	0.953	0.651	3.37233e-10
ZDHHC3	2.36166e-14	0.437211	0.674	0.266	3.48463e-10
PAQR6	2.43247e-14	0.32478	0.372	0.095	3.5891e-10
PLEKHA1	2.46702e-14	0.496501	0.721	0.312	3.64009e-10
EIF4ENIF1	2.49365e-14	0.39236	0.547	0.186	3.67938e-10
EIF3D	2.55143e-14	0.406791	0.721	0.288	3.76464e-10
BBOX1	2.62557e-14	0.401344	0.407	0.114	3.87403e-10
EPHA4	2.67499e-14	0.339997	0.395	0.106	3.94694e-10
DAAM1	2.69761e-14	0.4436	0.709	0.289	3.98032e-10
NIT2	2.78212e-14	0.425026	0.593	0.218	4.10501e-10
CAVIN1	2.87372e-14	-0.901236	0.616	0.821	4.24018e-10
ZFP64	2.89049e-14	0.370013	0.465	0.14	4.26491e-10
SELENOW	2.92338e-14	0.40867	0.628	0.236	4.31345e-10
NOS1	2.98598e-14	0.318234	0.326	0.075	4.40582e-10
GGT6	2.98622e-14	0.421889	0.419	0.122	4.40616e-10
APRT	2.9977e-14	0.478786	0.791	0.362	4.42311e-10
USP15	3.073e-14	0.442401	0.651	0.253	4.53421e-10
HSD11B2	3.11598e-14	0.295147	0.302	0.065	4.59763e-10
KMT2C	3.41015e-14	0.393671	0.756	0.306	5.03168e-10
GSN	3.45353e-14	-0.867817	0.721	0.861	5.09568e-10
LYPD3	3.61859e-14	0.701553	0.988	0.95	5.33923e-10
EIF3B	3.68205e-14	0.476695	0.721	0.307	5.43287e-10
TAGLN2	3.75891e-14	0.522375	1	0.878	5.54627e-10
TRAF7	3.84573e-14	0.451912	0.733	0.306	5.67437e-10
GTF2I	3.93798e-14	0.520625	0.965	0.587	5.81048e-10
CCT3	3.9703e-14	0.447415	0.814	0.355	5.85818e-10
UBE2E3	4.07624e-14	0.48712	0.826	0.386	6.0145e-10
ECPAS	4.25139e-14	0.399256	0.616	0.227	6.27293e-10
APEX1	4.29669e-14	0.483163	0.686	0.285	6.33977e-10
GJB3	4.42073e-14	0.342023	0.442	0.13	6.52279e-10
DYNLL1	4.51809e-14	0.521712	0.93	0.491	6.66645e-10
EZR	4.6933e-14	0.54316	0.919	0.504	6.92497e-10
DUS1L	5.20624e-14	0.397953	0.616	0.23	7.6818e-10
NCDN	5.55476e-14	0.39236	0.523	0.173	8.19604e-10
C19orf33	5.71354e-14	0.549188	0.953	0.654	8.43033e-10
RUFY3	5.75554e-14	0.461723	0.686	0.287	8.4923e-10
PIAS3	5.77911e-14	0.460253	0.663	0.278	8.52707e-10
FBXW4	6.09837e-14	0.508979	0.616	0.241	8.99815e-10
POLR2I	6.14352e-14	0.411209	0.651	0.249	9.06477e-10
JCHAIN	6.3e-14	-1.84835	0.023	0.45	9.29565e-10
DNAJB12	6.43513e-14	0.300327	0.36	0.09	9.49503e-10
ACTR1A	6.78214e-14	0.412278	0.616	0.233	1.0007e-09
TRPM4	7.27691e-14	0.422663	0.674	0.268	1.07371e-09
ADGRG1	7.41473e-14	0.412584	0.674	0.269	1.09404e-09
COMT	7.82133e-14	0.568158	0.826	0.43	1.15404e-09
ELF1	7.84115e-14	0.417189	0.558	0.204	1.15696e-09
FOSL2	7.95617e-14	0.474839	0.953	0.5	1.17393e-09
C21orf91	8.19331e-14	0.409861	0.523	0.18	1.20892e-09
PUM3	8.25552e-14	0.335672	0.488	0.153	1.2181e-09
NSMCE1	8.27125e-14	0.293803	0.302	0.067	1.22042e-09
PYURF	8.93445e-14	0.449439	0.628	0.25	1.31828e-09
GLRX3	9.0255e-14	0.327207	0.407	0.114	1.33171e-09
TP53	9.57734e-14	0.464158	0.616	0.238	1.41314e-09
KAT6A	9.66249e-14	0.422156	0.628	0.244	1.4257e-09
RNF187	1.00469e-13	0.501782	0.907	0.521	1.48242e-09
TBC1D2	1.00754e-13	0.389197	0.512	0.174	1.48663e-09
HNRNPH1	1.01571e-13	0.535539	0.977	0.775	1.49867e-09
DNASE1L3	1.04322e-13	0.507165	0.709	0.307	1.53928e-09
MFHAS1	1.12394e-13	0.372477	0.512	0.17	1.65838e-09
RABEP2	1.18542e-13	0.378297	0.558	0.199	1.74908e-09
MACROD1	1.29156e-13	0.459354	0.605	0.237	1.9057e-09
NSD3	1.29679e-13	0.395073	0.593	0.225	1.91342e-09
SLC19A2	1.3538e-13	0.342324	0.36	0.094	1.99753e-09
MTCL1	1.36536e-13	0.5039	0.64	0.264	2.01459e-09
CD63	1.36915e-13	-0.90678	0.337	0.679	2.02018e-09
FLNA	1.40483e-13	-0.850389	0.535	0.771	2.07283e-09
ELL2	1.41023e-13	0.511534	0.953	0.693	2.08079e-09
LEO1	1.44496e-13	0.392655	0.5	0.167	2.13204e-09
FXR2	1.4493e-13	0.3844	0.512	0.175	2.13845e-09
RNF135	1.52288e-13	0.341741	0.488	0.158	2.247e-09
WDR47	1.5263e-13	0.364803	0.407	0.119	2.25205e-09
FAM174A	1.55412e-13	0.400383	0.593	0.223	2.2931e-09
AHDC1	1.56307e-13	0.494039	0.826	0.418	2.3063e-09
IDH2	1.57885e-13	0.450537	0.628	0.256	2.3296e-09
THBS2	1.62174e-13	-0.979734	0.023	0.442	2.39288e-09
EIF4G1	1.68695e-13	0.421627	1	0.859	2.4891e-09
TMEM54	1.71045e-13	0.545345	0.686	0.329	2.52376e-09
CHMP3	1.72851e-13	0.439498	0.721	0.306	2.55041e-09
TBC1D8	1.74175e-13	0.410219	0.547	0.196	2.56995e-09
TMEM159	1.77153e-13	0.436458	0.558	0.209	2.61389e-09
NBEAL2	1.79396e-13	0.589164	0.849	0.493	2.64699e-09
CRABP2	1.86395e-13	0.489184	0.988	0.713	2.75026e-09
ID1	1.9315e-13	0.780963	0.93	0.761	2.84992e-09
TMEM184A	1.95591e-13	0.445289	0.547	0.198	2.88595e-09
KIAA0100	2.02812e-13	0.397778	0.628	0.247	2.99249e-09
RNF44	2.08591e-13	0.413927	0.651	0.263	3.07777e-09
ITPR3	2.09498e-13	0.496355	0.756	0.355	3.09114e-09
SLC25A28	2.11846e-13	0.470815	0.709	0.306	3.12579e-09
CWH43	2.15819e-13	0.457869	0.512	0.182	3.1844e-09
SESN3	2.2653e-13	0.469065	0.651	0.276	3.34244e-09
ADGRF4	2.39781e-13	0.254582	0.233	0.042	3.53797e-09
AEBP2	2.4904e-13	0.386283	0.57	0.211	3.67459e-09
IRX3	2.56187e-13	0.456	0.663	0.276	3.78004e-09
HES2	2.58564e-13	0.39401	0.477	0.158	3.81511e-09
KCNMA1	2.60359e-13	0.36183	0.314	0.076	3.84159e-09
LETM1	2.6251e-13	0.448851	0.593	0.236	3.87334e-09
ESPN	2.72424e-13	0.341027	0.36	0.096	4.01962e-09
KPNA4	2.78525e-13	0.481734	0.837	0.417	4.10964e-09
MBTD1	2.92576e-13	0.32757	0.419	0.123	4.31696e-09
EFNA5	2.98178e-13	0.318321	0.419	0.123	4.39962e-09
MGST2	3.03804e-13	0.367553	0.453	0.143	4.48263e-09
GATM	3.07339e-13	0.377575	0.395	0.116	4.53478e-09
PIK3C2B	3.08312e-13	0.333588	0.395	0.113	4.54915e-09
LSM14B	3.14055e-13	0.38414	0.535	0.188	4.63389e-09
CTTNBP2	3.22328e-13	0.35306	0.384	0.109	4.75595e-09
CCDC88C	3.35447e-13	0.429868	0.605	0.24	4.94952e-09
ATP2A2	3.38753e-13	0.482232	0.93	0.527	4.99829e-09
IFNGR2	3.38979e-13	0.418553	0.628	0.247	5.00164e-09
PPP1CB	3.47668e-13	0.470252	0.953	0.518	5.12984e-09
VANGL2	3.62518e-13	0.350782	0.5	0.168	5.34896e-09
KIAA0319L	3.65269e-13	0.388952	0.535	0.195	5.38955e-09
MORC2	3.74444e-13	0.334509	0.43	0.13	5.52493e-09
DNAJA4	3.8229e-13	0.365209	0.488	0.162	5.64069e-09
RALBP1	3.89371e-13	0.420095	0.651	0.264	5.74517e-09
DHRS3	4.13993e-13	0.453865	0.64	0.27	6.10847e-09
NARS	4.20568e-13	0.40154	0.686	0.28	6.20548e-09
SPRR2G	4.26399e-13	-1.84134	0.64	0.847	6.29151e-09
EGFR	4.35529e-13	0.473922	0.756	0.344	6.42622e-09
EPS15L1	4.41524e-13	0.311806	0.372	0.102	6.51469e-09
ATG4D	4.43577e-13	0.354914	0.442	0.139	6.54498e-09
ANXA4	4.45028e-13	0.384948	0.57	0.208	6.56638e-09
CYP2C18	4.46078e-13	0.411045	0.488	0.164	6.58187e-09
ZNF524	4.51013e-13	0.279636	0.291	0.065	6.6547e-09
RNF31	4.5371e-13	0.395561	0.547	0.201	6.69449e-09
NDRG1	4.5871e-13	0.500679	0.872	0.456	6.76826e-09
NME1	5.07873e-13	0.351718	0.57	0.207	7.49366e-09
WDFY2	5.35292e-13	0.389041	0.616	0.24	7.89824e-09
EZH2	5.64603e-13	0.33853	0.442	0.138	8.33072e-09
NOC2L	5.88139e-13	0.380514	0.558	0.204	8.67798e-09
SRP68	6.06022e-13	0.395073	0.581	0.226	8.94185e-09
TXNL4A	6.07344e-13	0.494764	0.698	0.333	8.96136e-09
IGF2R	6.21613e-13	0.443021	0.628	0.256	9.1719e-09
RIC3	6.22638e-13	0.315686	0.36	0.097	9.18703e-09
EVPLL	6.31893e-13	0.377456	0.419	0.128	9.32359e-09
EXOSC4	6.65579e-13	0.36257	0.442	0.14	9.82062e-09
PPP2CB	6.81237e-13	0.453492	1	0.732	1.00517e-08
EEF2K	6.90727e-13	0.466535	0.674	0.285	1.01917e-08
STK11	7.07084e-13	0.405342	0.616	0.245	1.0433e-08
SH3YL1	7.11675e-13	0.367804	0.547	0.197	1.05008e-08
BMP7	7.16546e-13	0.451799	0.651	0.265	1.05726e-08
MICALL1	7.28435e-13	0.475334	0.721	0.338	1.07481e-08
SSU72	7.2858e-13	0.408656	0.767	0.346	1.07502e-08
ATP6V1B2	7.32205e-13	0.394219	0.686	0.282	1.08037e-08
NAPG	7.3642e-13	0.321208	0.488	0.159	1.08659e-08
SAMD1	7.47972e-13	0.437183	0.605	0.243	1.10363e-08
RALA	7.52645e-13	0.450203	0.651	0.28	1.11053e-08
GNG12	8.3173e-13	0.481373	0.628	0.271	1.22722e-08
FMOD	8.32434e-13	-0.858477	0.023	0.425	1.22826e-08
USF2	8.4263e-13	0.427198	0.942	0.467	1.2433e-08
EXOC6B	8.44299e-13	0.44935	0.872	0.443	1.24576e-08
ZFYVE9	8.47111e-13	0.295807	0.302	0.072	1.24991e-08
TMEM63C	8.55783e-13	0.283668	0.291	0.067	1.26271e-08
CC2D1A	8.7467e-13	0.401511	0.581	0.224	1.29058e-08
NUAK2	8.76872e-13	0.504267	0.5	0.182	1.29383e-08
MEIS1	8.88464e-13	0.465586	0.5	0.189	1.31093e-08
STAU2	9.71051e-13	0.433613	0.663	0.289	1.43279e-08
PLEKHG3	9.73458e-13	0.436324	0.593	0.232	1.43634e-08
COL14A1	9.75379e-13	-0.830838	0.012	0.411	1.43917e-08
CCDC137	9.9594e-13	0.347451	0.43	0.135	1.46951e-08
ADIRF	1.01095e-12	-0.944157	0.047	0.451	1.49165e-08
OGDH	1.01512e-12	0.462419	0.767	0.383	1.49781e-08
H2AFY	1.01582e-12	0.410696	0.779	0.356	1.49885e-08
TRIM14	1.01967e-12	0.371263	0.477	0.162	1.50452e-08
CAMK1D	1.03921e-12	0.382673	0.57	0.214	1.53335e-08
UBAC1	1.04377e-12	0.354238	0.488	0.166	1.54009e-08
ARHGAP23	1.04895e-12	0.35837	0.663	0.263	1.54773e-08
ELOVL4	1.05369e-12	0.526272	0.593	0.245	1.55471e-08
ADK	1.06399e-12	0.429146	0.593	0.243	1.56991e-08
IFITM3	1.07377e-12	-0.895264	0.616	0.799	1.58435e-08
OSBPL6	1.10294e-12	0.309479	0.326	0.082	1.62738e-08
ABLIM1	1.18977e-12	0.507992	0.942	0.629	1.75551e-08
TEX2	1.20563e-12	0.326307	0.419	0.129	1.77891e-08
MAPKAPK3	1.20741e-12	0.390525	0.57	0.218	1.78154e-08
PNPLA7	1.21527e-12	0.292529	0.36	0.098	1.79313e-08
COQ2	1.2443e-12	0.291859	0.349	0.093	1.83596e-08
ATP5MC3	1.26994e-12	0.419152	0.779	0.354	1.8738e-08
BAG5	1.32445e-12	0.344049	0.523	0.182	1.95423e-08
ZMYM2	1.34713e-12	0.429133	0.791	0.368	1.98769e-08
SH3GLB1	1.36271e-12	0.385358	0.651	0.265	2.01067e-08
EPGN	1.41967e-12	0.516018	0.477	0.172	2.09472e-08
HINT1	1.45225e-12	0.426283	0.756	0.342	2.14279e-08
XPO6	1.45342e-12	0.403728	0.523	0.195	2.14452e-08
TWISTNB	1.45624e-12	0.299104	0.314	0.078	2.14869e-08
ANG	1.52106e-12	0.254262	0.244	0.049	2.24432e-08
MED20	1.59095e-12	0.270729	0.279	0.063	2.34745e-08
MDN1	1.61427e-12	0.328481	0.395	0.118	2.38186e-08
COASY	1.64391e-12	0.346211	0.442	0.143	2.42558e-08
ABHD5	1.70214e-12	0.35101	0.419	0.131	2.5115e-08
TSTD1	1.77849e-12	0.362721	0.477	0.164	2.62416e-08
KRT78	1.78056e-12	-1.79388	0.14	0.523	2.62722e-08
TMSB4X	1.82862e-12	-0.788573	1	0.965	2.69813e-08
CDCP1	1.89009e-12	0.343404	0.488	0.166	2.78882e-08
B4GALNT3	1.90956e-12	0.418074	0.593	0.238	2.81756e-08
BAIAP2	1.95955e-12	0.41135	0.721	0.315	2.89132e-08
RETREG3	1.96411e-12	0.378173	0.57	0.222	2.89804e-08
MARCKS	2.00154e-12	-0.765099	0.709	0.884	2.95327e-08
DEF6	2.03467e-12	0.405957	0.651	0.273	3.00216e-08
PANX1	2.04094e-12	0.331365	0.407	0.125	3.01141e-08
FOPNL	2.07603e-12	0.318753	0.419	0.129	3.06318e-08
ANKRD13D	2.13805e-12	0.451172	0.756	0.363	3.15469e-08
MAEA	2.22503e-12	0.362105	0.709	0.301	3.28303e-08
DDX6	2.37431e-12	0.424221	0.721	0.339	3.5033e-08
DSG3	2.46331e-12	0.431428	1	0.873	3.63461e-08
GHITM	2.57886e-12	0.417647	0.64	0.278	3.80511e-08
PAPOLA	2.83779e-12	0.407437	0.791	0.379	4.18717e-08
RRM1	2.90563e-12	0.383124	0.5	0.177	4.28726e-08
TNKS1BP1	2.90976e-12	0.487268	0.953	0.705	4.29335e-08
ABR	2.9243e-12	0.435108	0.721	0.324	4.3148e-08
C1orf21	3.13211e-12	0.395898	0.5	0.182	4.62144e-08
CDC123	3.14819e-12	0.378255	0.535	0.201	4.64515e-08
KEAP1	3.17277e-12	0.374819	0.523	0.194	4.68142e-08
LCE3D	3.18574e-12	-1.88031	0.151	0.535	4.70056e-08
MAP4K5	3.25034e-12	0.333531	0.535	0.192	4.79587e-08
ATP2B1	3.34839e-12	0.331093	0.442	0.144	4.94055e-08
LANCL1	3.35282e-12	0.35505	0.43	0.14	4.94708e-08
USP5	3.37105e-12	0.377097	0.535	0.203	4.97399e-08
SC5D	3.3906e-12	0.353813	0.43	0.139	5.00283e-08
GOLPH3L	3.41092e-12	0.407559	0.593	0.243	5.03282e-08
PITX1	3.52254e-12	0.442567	0.977	0.735	5.1975e-08
LRRC8A	3.5415e-12	0.323695	0.453	0.151	5.22548e-08
LDLRAD3	3.58092e-12	0.299546	0.395	0.118	5.28364e-08
SNX1	3.69914e-12	0.429601	0.698	0.319	5.45808e-08
FEM1A	3.77525e-12	0.337712	0.395	0.122	5.57038e-08
CYP2R1	3.79264e-12	0.28274	0.349	0.095	5.59604e-08
FBLN2	3.80153e-12	-0.834567	0.035	0.426	5.60915e-08
ZFP36L1	3.88969e-12	0.48003	1	0.95	5.73923e-08
TBCB	3.89598e-12	0.386821	0.605	0.249	5.74852e-08
PYCARD	3.95377e-12	0.402714	0.605	0.245	5.83379e-08
BGN	3.97986e-12	-0.822478	0.047	0.437	5.87229e-08
DTD1	4.0553e-12	0.345365	0.384	0.116	5.98359e-08
CHMP4B	4.07421e-12	0.484017	0.919	0.54	6.0115e-08
SMIM14	4.10473e-12	0.350666	0.384	0.117	6.05653e-08
AP4E1	4.57268e-12	0.252595	0.267	0.06	6.74698e-08
SPACA9	4.60632e-12	0.291119	0.291	0.071	6.79662e-08
FNBP4	4.66282e-12	0.435408	0.686	0.3	6.88e-08
PATJ	4.68185e-12	0.48071	0.837	0.443	6.90807e-08
EPB41L4B	4.6822e-12	0.34273	0.442	0.145	6.90858e-08
ATAD1	4.68982e-12	0.330767	0.43	0.14	6.91983e-08
PIR	4.82193e-12	0.329756	0.384	0.116	7.11476e-08
C11orf80	4.88507e-12	0.367628	0.465	0.161	7.20791e-08
OGFRL1	4.89593e-12	0.343957	0.453	0.152	7.22394e-08
IFITM2	5.00962e-12	-0.902245	0.209	0.561	7.39169e-08
DARS	5.1751e-12	0.347006	0.477	0.164	7.63586e-08
PAK6	5.3077e-12	0.357756	0.453	0.156	7.83151e-08
VPS9D1	5.3266e-12	0.359663	0.535	0.2	7.8594e-08
HSPA9	5.6453e-12	0.361498	0.733	0.322	8.32964e-08
ZBTB44	5.77436e-12	0.416871	0.523	0.202	8.52007e-08
PYM1	5.83026e-12	0.345805	0.488	0.174	8.60255e-08
PLEKHM2	5.84354e-12	0.40025	0.767	0.353	8.62214e-08
BDP1	5.96617e-12	0.357773	0.57	0.22	8.80309e-08
TMEM131L	6.0512e-12	0.327389	0.337	0.094	8.92854e-08
TMTC3	6.38132e-12	0.310748	0.395	0.12	9.41563e-08
HTATIP2	6.38725e-12	0.340768	0.407	0.129	9.42438e-08
AFMID	6.58105e-12	0.403224	0.477	0.174	9.71033e-08
CCDC85C	6.82145e-12	0.360199	0.593	0.237	1.0065e-07
LCMT1	6.89243e-12	0.343093	0.535	0.2	1.01698e-07
UPF2	6.89498e-12	0.318753	0.395	0.121	1.01735e-07
SMARCA2	6.924e-12	0.376787	0.616	0.25	1.02164e-07
ABCD3	7.00074e-12	0.374737	0.558	0.218	1.03296e-07
KCTD2	7.03463e-12	0.317983	0.465	0.158	1.03796e-07
APOE	7.08004e-12	-0.969578	0.012	0.39	1.04466e-07
PRRX1	7.22997e-12	-0.856276	0.116	0.493	1.06678e-07
ARSG	7.27838e-12	0.275118	0.302	0.076	1.07392e-07
RAPH1	7.28509e-12	0.276262	0.337	0.09	1.07492e-07
AQP1	7.49666e-12	-0.912551	0.023	0.402	1.10613e-07
EIF4A2	7.54019e-12	0.483228	0.802	0.415	1.11255e-07
ADCK2	7.95818e-12	0.27726	0.326	0.087	1.17423e-07
RABGGTB	8.06245e-12	0.378015	0.581	0.232	1.18961e-07
CTSC	8.24742e-12	0.419819	0.535	0.21	1.21691e-07
PTBP3	8.39044e-12	0.440864	0.616	0.271	1.23801e-07
CAPN7	8.59754e-12	0.358504	0.535	0.201	1.26857e-07
PUF60	8.60263e-12	0.395984	0.733	0.328	1.26932e-07
NFKBIZ	8.61401e-12	0.378903	0.628	0.261	1.271e-07
CENPP	8.64824e-12	0.400579	0.547	0.216	1.27605e-07
VCAN	8.89488e-12	-0.910307	0.023	0.4	1.31244e-07
ZBTB5	8.94361e-12	0.351178	0.43	0.145	1.31963e-07
OTUD4	9.11411e-12	0.338358	0.477	0.167	1.34479e-07
TMPRSS13	9.16801e-12	0.343307	0.512	0.185	1.35274e-07
POLR3E	9.19722e-12	0.335314	0.5	0.18	1.35705e-07
ARID1A	9.23705e-12	0.361613	0.616	0.25	1.36293e-07
FAF1	9.26333e-12	0.319597	0.43	0.14	1.3668e-07
PRMT3	9.5201e-12	0.279895	0.326	0.088	1.40469e-07
PLA2G4B	1.00658e-11	0.402472	0.674	0.29	1.48521e-07
POU2F3	1.01095e-11	0.255304	0.256	0.057	1.49166e-07
IGKV4-1	1.017e-11	-1.47101	0.012	0.386	1.50058e-07
DDX3X	1.02e-11	0.485152	0.953	0.719	1.505e-07
LCORL	1.02853e-11	0.356657	0.465	0.164	1.5176e-07
CEP170B	1.03795e-11	0.398276	0.709	0.326	1.53149e-07
WEE1	1.05715e-11	0.447426	0.663	0.3	1.55983e-07
TWF1	1.06894e-11	0.374645	0.616	0.257	1.57722e-07
MAGED1	1.07077e-11	0.381473	0.558	0.222	1.57992e-07
SCAF11	1.09225e-11	0.384125	0.64	0.27	1.61162e-07
HSD17B10	1.10396e-11	0.345101	0.628	0.254	1.6289e-07
TRAK1	1.1072e-11	0.41047	0.733	0.336	1.63367e-07
CPNE1	1.11549e-11	0.394549	0.698	0.309	1.64591e-07
RARS	1.14455e-11	0.378861	0.64	0.269	1.68878e-07
SENP5	1.18717e-11	0.318783	0.442	0.147	1.75167e-07
HGS	1.26691e-11	0.434734	0.721	0.35	1.86933e-07
BCLAF1	1.27262e-11	0.440477	0.767	0.369	1.87776e-07
GTPBP4	1.27723e-11	0.351261	0.512	0.188	1.88455e-07
WDR43	1.27819e-11	0.351823	0.465	0.162	1.88596e-07
TBL1XR1	1.30674e-11	0.368292	0.674	0.291	1.9281e-07
EIF5B	1.36062e-11	0.32823	0.512	0.188	2.00759e-07
DLGAP4	1.37614e-11	0.454495	0.779	0.411	2.03049e-07
NOP56	1.39239e-11	0.412842	0.57	0.242	2.05447e-07
SIKE1	1.41358e-11	0.291859	0.337	0.095	2.08574e-07
TRIR	1.42317e-11	0.425294	0.884	0.472	2.09989e-07
DR1	1.47038e-11	0.376937	0.581	0.238	2.16954e-07
POLD2	1.47825e-11	0.401236	0.605	0.25	2.18116e-07
SLC25A37	1.4991e-11	0.345619	0.535	0.203	2.21193e-07
LPIN3	1.54589e-11	0.418863	0.581	0.248	2.28096e-07
DMXL1	1.60286e-11	0.346194	0.558	0.217	2.36502e-07
TOM1L1	1.66935e-11	0.319179	0.407	0.13	2.46312e-07
POSTN	1.67963e-11	-0.947359	0.07	0.439	2.47829e-07
RPAIN	1.67975e-11	0.357977	0.465	0.166	2.47848e-07
PRR12	1.68724e-11	0.35023	0.593	0.239	2.48952e-07
ZNF512B	1.70608e-11	0.329307	0.581	0.23	2.51733e-07
ZNF84	1.74334e-11	0.260969	0.291	0.072	2.57229e-07
OVOL2	1.75488e-11	0.260969	0.302	0.078	2.58933e-07
ZNF787	1.75511e-11	0.344132	0.57	0.223	2.58967e-07
VARS	1.76742e-11	0.338869	0.488	0.176	2.60783e-07
TFDP1	1.76903e-11	0.420732	0.593	0.251	2.6102e-07
ACADSB	1.78872e-11	0.277773	0.291	0.073	2.63926e-07
PRKDC	1.79885e-11	0.400777	0.535	0.214	2.6542e-07
ATP5F1D	1.8328e-11	0.476115	0.872	0.464	2.70429e-07
MAP6D1	1.88275e-11	0.279895	0.314	0.084	2.778e-07
SLC25A3	1.93208e-11	0.424603	0.837	0.423	2.85078e-07
COL5A1	1.96702e-11	-0.782764	0.035	0.404	2.90235e-07
DYNLL2	2.02163e-11	0.393007	0.767	0.358	2.98292e-07
ACSL3	2.02905e-11	0.357773	0.57	0.226	2.99387e-07
OSBPL2	2.04323e-11	0.420351	0.651	0.303	3.01478e-07
VPS36	2.06576e-11	0.446624	0.698	0.327	3.04803e-07
HSPD1	2.0745e-11	0.387643	0.756	0.331	3.06092e-07
EIF3M	2.09616e-11	0.382166	0.756	0.353	3.09288e-07
ANKHD1	2.20133e-11	0.387364	0.86	0.422	3.24806e-07
YTHDF1	2.26907e-11	0.375966	0.512	0.197	3.34801e-07
SMTN	2.29228e-11	0.433878	0.674	0.307	3.38226e-07
ERLIN1	2.30771e-11	0.29134	0.407	0.13	3.40503e-07
L3MBTL2	2.30822e-11	0.264949	0.302	0.079	3.40578e-07
VPS35	2.35053e-11	0.370104	0.488	0.183	3.4682e-07
PARD3	2.36895e-11	0.358899	0.581	0.237	3.49538e-07
PPFIA1	2.39741e-11	0.309509	0.535	0.202	3.53737e-07
GTF3C1	2.4107e-11	0.422185	0.791	0.408	3.55698e-07
OSBP	2.42202e-11	0.370268	0.593	0.247	3.57368e-07
CTSK	2.48081e-11	-0.917742	0.058	0.428	3.66043e-07
PTGS1	2.6471e-11	0.351774	0.36	0.111	3.9058e-07
ZDHHC18	2.64819e-11	0.29639	0.36	0.107	3.9074e-07
AKAP8L	2.66269e-11	0.370312	0.616	0.259	3.9288e-07
ETFA	2.73988e-11	0.351037	0.581	0.235	4.0427e-07
TPR	2.81287e-11	0.378736	0.651	0.285	4.15039e-07
DSC1	2.81843e-11	0.726867	0.453	0.175	4.1586e-07
PITPNB	2.85268e-11	0.370298	0.605	0.256	4.20913e-07
SFXN1	2.8897e-11	0.299304	0.465	0.161	4.26375e-07
IRF9	2.9017e-11	0.388965	0.791	0.373	4.28145e-07
FAM210B	2.95665e-11	0.300229	0.36	0.108	4.36254e-07
NDUFS6	3.01462e-11	0.414449	0.802	0.404	4.44808e-07
SRD5A1	3.06672e-11	0.322465	0.43	0.145	4.52495e-07
TMEM41B	3.12295e-11	0.336227	0.477	0.173	4.60792e-07
PPAN	3.18499e-11	0.360652	0.488	0.18	4.69945e-07
MUC21	3.21944e-11	-1.5935	0.012	0.373	4.75028e-07
AGO2	3.24359e-11	0.325403	0.535	0.203	4.78592e-07
NELFCD	3.27925e-11	0.366681	0.523	0.205	4.83853e-07
TMEM30B	3.28916e-11	0.283484	0.36	0.108	4.85315e-07
CD99	3.40568e-11	-0.791764	0.488	0.706	5.02508e-07
CCAR1	3.41871e-11	0.374645	0.605	0.253	5.04431e-07
TPSB2	3.52615e-11	-0.985158	0.081	0.446	5.20284e-07
NIPAL2	3.5289e-11	0.363078	0.5	0.189	5.2069e-07
STAT6	3.57625e-11	0.38735	0.872	0.443	5.27675e-07
S100A16	3.6509e-11	0.384095	1	0.881	5.3869e-07
RIOK1	3.67426e-11	0.328963	0.43	0.147	5.42137e-07
MAPRE1	3.74763e-11	0.433103	0.64	0.301	5.52964e-07
ENOPH1	3.80583e-11	0.338358	0.465	0.168	5.6155e-07
COL12A1	3.80712e-11	-0.900351	0.012	0.371	5.61741e-07
PDS5A	3.84204e-11	0.386843	0.651	0.29	5.66894e-07
PDCD4	3.95576e-11	0.545761	0.744	0.428	5.83672e-07
EIF4E	4.04777e-11	0.325403	0.535	0.207	5.97249e-07
TMEM63B	4.07187e-11	0.343622	0.488	0.184	6.00805e-07
2022-03-06	4.19726e-11	0.369456	0.709	0.32	6.19306e-07
EPRS	4.22936e-11	0.364484	0.547	0.221	6.24042e-07
SH2D3A	4.29582e-11	0.290015	0.372	0.114	6.33849e-07
ZKSCAN1	4.338e-11	0.36372	0.605	0.253	6.40072e-07
MAPKAPK2	4.34025e-11	0.411158	0.837	0.438	6.40404e-07
DEAF1	4.37637e-11	0.354904	0.512	0.196	6.45733e-07
PAWR	4.44094e-11	0.316024	0.605	0.244	6.5526e-07
ZMYND19	4.44126e-11	0.309981	0.477	0.172	6.55308e-07
ACOT7	4.53576e-11	0.326365	0.477	0.174	6.69251e-07
CFD	4.59604e-11	-0.867366	0.047	0.406	6.78145e-07
CASP6	4.61967e-11	0.327739	0.43	0.147	6.81633e-07
UTP3	4.66279e-11	0.328369	0.547	0.215	6.87995e-07
UBE2Z	4.69735e-11	0.34654	0.628	0.267	6.93095e-07
TSHZ2	4.83365e-11	0.332642	0.43	0.149	7.13205e-07
MTREX	5.14913e-11	0.309991	0.407	0.135	7.59755e-07
RAB12	5.1811e-11	0.354904	0.512	0.199	7.64471e-07
EIF2B5	5.32155e-11	0.355989	0.605	0.254	7.85194e-07
SLC44A1	5.35627e-11	0.376702	0.628	0.272	7.90317e-07
PSMD7	5.48187e-11	0.362281	0.558	0.23	8.0885e-07
ZNF598	5.64006e-11	0.391401	0.698	0.329	8.3219e-07
MIF	5.6547e-11	0.460756	1	0.744	8.34352e-07
NEDD4L	5.66009e-11	0.357047	0.36	0.115	8.35146e-07
NSFL1C	5.75875e-11	0.35576	0.581	0.242	8.49704e-07
CLCN3	5.82419e-11	0.367179	0.628	0.275	8.5936e-07
NDEL1	5.84029e-11	0.532289	0.814	0.466	8.61735e-07
MYO19	6.07779e-11	0.362281	0.547	0.222	8.96777e-07
ARNTL	6.22483e-11	0.288054	0.349	0.104	9.18474e-07
PBX1	6.3055e-11	0.366763	0.744	0.346	9.30376e-07
GID8	6.6207e-11	0.384715	0.779	0.394	9.76884e-07
ZC2HC1A	6.63601e-11	0.293814	0.314	0.089	9.79143e-07
RAB14	6.6499e-11	0.443014	0.64	0.317	9.81193e-07
REPS1	6.69321e-11	0.334749	0.465	0.17	9.87584e-07
ARPC2	6.70991e-11	0.420633	0.988	0.771	9.90047e-07
COG7	7.03375e-11	0.280387	0.372	0.116	1.03783e-06
CTR9	7.07052e-11	0.298214	0.407	0.135	1.04326e-06
PPP2R3A	7.1135e-11	0.307937	0.349	0.106	1.0496e-06
SFSWAP	7.14543e-11	0.413949	0.558	0.238	1.05431e-06
PLEKHH3	7.40221e-11	0.340344	0.651	0.283	1.0922e-06
TMEM181	7.51908e-11	0.27784	0.372	0.116	1.10944e-06
EIF2AK1	7.60708e-11	0.312838	0.488	0.182	1.12242e-06
ETFDH	7.6312e-11	0.258667	0.291	0.077	1.12598e-06
RAB7B	7.68358e-11	0.369118	0.547	0.223	1.13371e-06
POGLUT1	7.69832e-11	0.332642	0.43	0.15	1.13589e-06
LTO1	7.95744e-11	0.286203	0.384	0.123	1.17412e-06
NCOA6	7.97025e-11	0.343404	0.465	0.172	1.17601e-06
CPT1B	8.25629e-11	0.327389	0.419	0.144	1.21822e-06
PSMG1	8.31512e-11	0.317558	0.43	0.149	1.2269e-06
HADHA	8.51953e-11	0.364065	0.64	0.282	1.25706e-06
TMEM250	8.56124e-11	0.290015	0.372	0.117	1.26321e-06
TNFAIP1	8.58562e-11	0.368	0.57	0.243	1.26681e-06
TRNP1	8.62873e-11	0.304078	0.349	0.106	1.27317e-06
KMT2D	8.7204e-11	0.366695	0.744	0.349	1.2867e-06
ADAP2	8.93177e-11	0.328481	0.36	0.113	1.31788e-06
CDC42SE1	8.96213e-11	0.387942	0.895	0.476	1.32236e-06
ZNF692	8.96412e-11	0.37469	0.57	0.235	1.32266e-06
AAAS	9.28868e-11	0.303708	0.523	0.2	1.37054e-06
YKT6	9.31165e-11	0.318812	0.477	0.177	1.37393e-06
GSS	9.4652e-11	0.399634	0.523	0.215	1.39659e-06
EHF	9.69586e-11	0.4644	0.907	0.616	1.43062e-06
KHSRP	1.00531e-10	0.418281	0.814	0.426	1.48334e-06
EXOSC7	1.01577e-10	0.355404	0.535	0.215	1.49877e-06
MXRA8	1.02278e-10	-0.768004	0.023	0.373	1.50911e-06
MFSD6	1.02558e-10	0.318783	0.43	0.151	1.51324e-06
BCL2L2	1.06671e-10	0.3937	0.767	0.383	1.57393e-06
NUDCD2	1.07172e-10	0.291903	0.349	0.106	1.58132e-06
GLCE	1.07194e-10	0.318279	0.337	0.103	1.58164e-06
RDH11	1.08228e-10	0.336498	0.477	0.176	1.5969e-06
CAPG	1.08596e-10	0.463224	0.872	0.535	1.60234e-06
SEPTIN10	1.08955e-10	0.412321	0.616	0.281	1.60764e-06
PGBD2	1.09716e-10	0.250682	0.291	0.077	1.61887e-06
ERG28	1.10956e-10	0.301281	0.419	0.144	1.63715e-06
TBC1D17	1.1426e-10	0.334972	0.523	0.205	1.68591e-06
RCOR3	1.184e-10	0.365672	0.547	0.227	1.74699e-06
GGH	1.21526e-10	0.374854	0.442	0.162	1.79312e-06
IP6K2	1.24609e-10	0.419755	0.791	0.41	1.8386e-06
VPS26A	1.29715e-10	0.359756	0.512	0.206	1.91395e-06
AKAP9	1.31996e-10	0.412361	0.651	0.307	1.9476e-06
SLC25A10	1.34036e-10	0.333251	0.453	0.168	1.9777e-06
NAB1	1.36053e-10	0.471336	0.744	0.395	2.00746e-06
TIA1	1.37466e-10	0.381579	0.663	0.297	2.02831e-06
HMGN3	1.42989e-10	0.409003	0.64	0.298	2.1098e-06
AGAP3	1.44259e-10	0.336355	0.651	0.275	2.12855e-06
ARPP19	1.45163e-10	0.358921	0.651	0.287	2.14188e-06
LRBA	1.48618e-10	0.354775	0.5	0.199	2.19286e-06
GNG5	1.487e-10	0.300133	0.384	0.126	2.19407e-06
TPM2	1.50471e-10	-0.662712	0.047	0.395	2.2202e-06
DDX42	1.50571e-10	0.369417	0.674	0.309	2.22168e-06
UBA1	1.50729e-10	0.368859	0.814	0.406	2.22401e-06
TMEM147	1.53027e-10	0.318437	0.488	0.186	2.25791e-06
EIF4A3	1.55433e-10	0.385037	0.523	0.221	2.29342e-06
PAQR3	1.57485e-10	0.301281	0.407	0.138	2.3237e-06
CERS3	1.5903e-10	0.416697	0.663	0.314	2.34648e-06
ILVBL	1.61894e-10	0.369475	0.686	0.331	2.38874e-06
RPH3AL	1.63706e-10	0.285494	0.36	0.114	2.41548e-06
CSE1L	1.64211e-10	0.342876	0.488	0.188	2.42293e-06
IKZF5	1.64297e-10	0.257649	0.326	0.094	2.42421e-06
C10orf113	1.64936e-10	0.272469	0.291	0.079	2.43363e-06
NGLY1	1.6701e-10	0.284039	0.326	0.096	2.46423e-06
PSMC4	1.68146e-10	0.358899	0.547	0.23	2.48099e-06
TIAL1	1.68876e-10	0.381755	0.628	0.281	2.49176e-06
ZNF703	1.6959e-10	0.30801	0.407	0.139	2.5023e-06
TSC22D1	1.72412e-10	0.360199	0.674	0.309	2.54394e-06
GUK1	1.73272e-10	0.437553	0.965	0.666	2.55663e-06
MGME1	1.74849e-10	0.271493	0.372	0.118	2.57989e-06
IFI27	1.7515e-10	0.380839	1	0.967	2.58434e-06
EAPP	1.75238e-10	0.323979	0.477	0.182	2.58564e-06
SARS	1.75937e-10	0.375212	0.802	0.398	2.59594e-06
CRK	1.784e-10	0.358162	0.674	0.305	2.6323e-06
TM9SF3	1.96838e-10	0.388705	0.581	0.255	2.90435e-06
SNU13	1.98077e-10	0.368122	0.593	0.262	2.92262e-06
HSPA4	2.01228e-10	0.364966	0.616	0.274	2.96912e-06
CLTC	2.03401e-10	0.394914	0.791	0.417	3.00118e-06
SLC35F6	2.07264e-10	0.34768	0.558	0.234	3.05819e-06
MEX3D	2.11433e-10	0.356976	0.57	0.241	3.11969e-06
ZNF462	2.15515e-10	0.362423	0.558	0.235	3.17993e-06
UGDH	2.28702e-10	0.33633	0.419	0.148	3.3745e-06
ATG2B	2.29268e-10	0.309981	0.453	0.165	3.38285e-06
UQCRQ	2.29996e-10	0.386333	0.837	0.427	3.39359e-06
RCAN3	2.34232e-10	0.302029	0.5	0.193	3.45609e-06
FBXL19	2.35058e-10	0.307382	0.488	0.187	3.46828e-06
NOL3	2.37285e-10	0.285534	0.465	0.171	3.50114e-06
TRAPPC12	2.42208e-10	0.342372	0.523	0.21	3.57379e-06
CHID1	2.46796e-10	0.370086	0.453	0.174	3.64148e-06
FAM83F	2.48263e-10	0.287025	0.395	0.132	3.66312e-06
TMX1	2.49422e-10	0.367108	0.593	0.26	3.68023e-06
C6orf132	2.53791e-10	0.391352	0.988	0.647	3.74468e-06
LAMTOR1	2.57426e-10	0.314374	0.64	0.277	3.79832e-06
STAM	2.63379e-10	0.313268	0.372	0.123	3.88615e-06
FDCSP	2.67226e-10	-1.6345	0	0.334	3.94291e-06
RBM25	2.688e-10	0.37441	0.709	0.337	3.96614e-06
TALDO1	2.71659e-10	0.406136	0.895	0.511	4.00833e-06
VPS45	2.78313e-10	0.361464	0.57	0.241	4.1065e-06
TM7SF3	2.81775e-10	0.379266	0.523	0.213	4.15758e-06
AP5M1	2.82813e-10	0.283484	0.337	0.103	4.17291e-06
OSTF1	2.8746e-10	0.333815	0.512	0.204	4.24147e-06
POLR1D	2.87905e-10	0.38141	0.86	0.463	4.24804e-06
ANP32B	2.87927e-10	0.370449	0.663	0.306	4.24836e-06
TET2	2.88179e-10	0.343093	0.5	0.202	4.25209e-06
STX16	2.89509e-10	0.363023	0.767	0.363	4.2717e-06
TAF15	2.90975e-10	0.435378	0.919	0.536	4.29333e-06
TRIM13	3.03047e-10	0.340297	0.488	0.194	4.47145e-06
SH3GLB2	3.0861e-10	0.442305	0.872	0.511	4.55354e-06
MCUR1	3.11197e-10	0.367937	0.523	0.215	4.59171e-06
FBH1	3.19393e-10	0.29793	0.512	0.198	4.71265e-06
DDI2	3.19608e-10	0.340314	0.535	0.219	4.71582e-06
EML4	3.25971e-10	0.370172	0.5	0.202	4.8097e-06
POLR1A	3.28019e-10	0.282793	0.43	0.152	4.83991e-06
AGPAT5	3.28613e-10	0.262676	0.267	0.07	4.84868e-06
PLXNA2	3.31975e-10	0.305539	0.407	0.142	4.89829e-06
TNS4	3.32973e-10	0.517714	0.744	0.426	4.91302e-06
DNAJB1	3.33586e-10	0.445389	0.907	0.594	4.92206e-06
DKC1	3.35229e-10	0.336609	0.419	0.15	4.94631e-06
MAPK13	3.38658e-10	0.369052	0.802	0.403	4.9969e-06
ECHS1	3.39971e-10	0.357593	0.628	0.286	5.01627e-06
PRRG4	3.44992e-10	0.342876	0.488	0.194	5.09035e-06
SLMAP	3.47184e-10	0.307382	0.488	0.19	5.12271e-06
SNRNP48	3.5384e-10	0.253042	0.302	0.086	5.2209e-06
IFFO2	3.573e-10	0.478843	0.791	0.447	5.27196e-06
ZFP91	3.5905e-10	0.400723	0.57	0.25	5.29778e-06
HAGH	3.61764e-10	0.341008	0.453	0.173	5.33782e-06
TP53AIP1	3.67688e-10	0.407111	0.674	0.314	5.42524e-06
ARHGEF19	3.79988e-10	0.345019	0.465	0.178	5.60672e-06
PBDC1	3.82652e-10	0.282196	0.337	0.104	5.64603e-06
MORC3	3.84551e-10	0.33931	0.442	0.166	5.67406e-06
IFT57	4.02302e-10	0.312606	0.314	0.094	5.93596e-06
FBXO9	4.09602e-10	0.307085	0.442	0.162	6.04367e-06
MTFR1L	4.24134e-10	0.361464	0.558	0.24	6.2581e-06
BLOC1S2	4.33411e-10	0.351979	0.453	0.176	6.39498e-06
COPS2	4.47499e-10	0.299782	0.477	0.182	6.60285e-06
THEM6	4.52078e-10	0.264674	0.349	0.11	6.67041e-06
SET	4.55053e-10	0.465793	0.942	0.592	6.71431e-06
PPM1K	4.57839e-10	0.321298	0.337	0.108	6.75541e-06
PMVK	4.65651e-10	0.34768	0.547	0.233	6.87067e-06
IARS	4.93738e-10	0.323311	0.407	0.144	7.2851e-06
APEH	5.0521e-10	0.297467	0.453	0.168	7.45437e-06
RNF144B	5.64715e-10	0.305539	0.407	0.144	8.33237e-06
SLC7A1	5.7296e-10	0.401217	0.651	0.301	8.45403e-06
SCRIB	5.74043e-10	0.419271	0.779	0.415	8.47e-06
CHD7	5.90831e-10	0.284215	0.349	0.112	8.71771e-06
MAVS	6.0199e-10	0.359362	0.57	0.25	8.88237e-06
SERPINF1	6.03196e-10	-0.678272	0.035	0.371	8.90016e-06
TOMM7	6.14891e-10	0.363294	0.779	0.374	9.07272e-06
ARHGAP35	6.16746e-10	0.380345	0.535	0.235	9.10009e-06
ANKRD12	6.20632e-10	0.289421	0.372	0.125	9.15742e-06
CARD14	6.2757e-10	0.281662	0.349	0.112	9.25979e-06
BIRC6	6.48325e-10	0.29325	0.419	0.151	9.56603e-06
KIF21A	6.53284e-10	0.288014	0.465	0.176	9.63921e-06
PRIMA1	6.5631e-10	0.312413	0.267	0.074	9.68385e-06
FAM117B	6.57228e-10	0.378471	0.43	0.164	9.69739e-06
ANKRD9	6.61769e-10	0.314031	0.465	0.18	9.76441e-06
PI4K2B	6.64502e-10	0.307186	0.349	0.114	9.80472e-06
LTB4R2	6.74937e-10	0.298276	0.36	0.12	9.9587e-06
ADNP	6.77634e-10	0.323302	0.581	0.254	9.99849e-06
DKK3	6.88247e-10	-0.676972	0.093	0.425	1.01551e-05
GPS1	6.93211e-10	0.31292	0.616	0.268	1.02283e-05
MAPK14	6.96425e-10	0.324671	0.698	0.324	1.02758e-05
SMG6	6.9989e-10	0.307794	0.442	0.167	1.03269e-05
KDM1A	7.17717e-10	0.329821	0.523	0.219	1.05899e-05
TNPO2	7.18473e-10	0.315754	0.5	0.198	1.06011e-05
MAMDC2	7.32929e-10	0.468624	0.547	0.239	1.08144e-05
YWHAQ	7.40387e-10	0.410332	0.965	0.717	1.09244e-05
SENP3	7.69135e-10	0.285787	0.407	0.144	1.13486e-05
MED4	7.93117e-10	0.281	0.5	0.194	1.17024e-05
AVEN	8.02228e-10	0.381168	0.547	0.241	1.18369e-05
BAZ1A	8.03414e-10	0.29016	0.419	0.152	1.18544e-05
PDGFRB	8.28026e-10	-0.689224	0.035	0.362	1.22175e-05
SLK	8.36831e-10	0.375786	0.849	0.456	1.23474e-05
EEF2	8.41015e-10	0.378568	1	0.96	1.24092e-05
RNF149	8.46263e-10	0.358565	0.767	0.389	1.24866e-05
ZNF317	8.51234e-10	0.274029	0.36	0.119	1.256e-05
SOD3	8.59512e-10	-0.73782	0.07	0.403	1.26821e-05
CYFIP1	8.63111e-10	0.332119	0.57	0.249	1.27352e-05
PCNX2	8.7938e-10	0.280083	0.442	0.16	1.29753e-05
UBE2I	9.00861e-10	0.359749	0.698	0.344	1.32922e-05
EIF4B	9.01989e-10	0.404532	1	0.645	1.33088e-05
C1orf122	9.62965e-10	0.309329	0.663	0.297	1.42086e-05
MGLL	9.63258e-10	0.370512	0.663	0.318	1.42129e-05
TPRG1L	9.69686e-10	0.408678	0.465	0.197	1.43077e-05
ATP13A4	9.98701e-10	0.398436	0.605	0.274	1.47358e-05
TMEM106B	1.00351e-09	0.27861	0.372	0.126	1.48068e-05
NOP10	1.01777e-09	0.279368	0.384	0.133	1.50172e-05
GDE1	1.03996e-09	0.285244	0.419	0.152	1.53446e-05
TMBIM1	1.10624e-09	0.370764	0.802	0.412	1.63226e-05
SOX7	1.12749e-09	0.337683	0.465	0.183	1.66361e-05
TGS1	1.13638e-09	0.27726	0.291	0.085	1.67673e-05
MIA2	1.13853e-09	0.321237	0.395	0.142	1.67991e-05
SLC7A8	1.18613e-09	0.267698	0.372	0.126	1.75013e-05
TP53RK	1.19502e-09	0.268526	0.337	0.108	1.76325e-05
ACTR1B	1.21376e-09	0.334509	0.628	0.286	1.7909e-05
PGLYRP3	1.24435e-09	0.324972	0.605	0.255	1.83604e-05
KIAA1671	1.27026e-09	0.428511	0.686	0.341	1.87427e-05
CBR4	1.34219e-09	0.290745	0.395	0.141	1.98039e-05
SCP2	1.3438e-09	0.414994	0.709	0.385	1.98277e-05
ZFR	1.34522e-09	0.314596	0.5	0.204	1.98487e-05
SP3	1.37744e-09	0.335002	0.651	0.3	2.03242e-05
NDUFB2	1.39409e-09	0.3108	0.605	0.266	2.05697e-05
TRAPPC1	1.39432e-09	0.3324	0.57	0.247	2.05732e-05
LDB1	1.40196e-09	0.494468	0.791	0.471	2.06859e-05
MGAT4B	1.41015e-09	0.331254	0.523	0.222	2.08068e-05
LCOR	1.41278e-09	0.318437	0.477	0.192	2.08455e-05
IGLV3-1	1.41947e-09	-1.52294	0.012	0.328	2.09443e-05
TIMP1	1.44826e-09	-0.589195	0.023	0.347	2.13691e-05
RTF1	1.47768e-09	0.282938	0.349	0.116	2.18032e-05
DNAJC7	1.49354e-09	0.326333	0.616	0.278	2.20372e-05
BCL6	1.51881e-09	0.352577	0.616	0.285	2.241e-05
TMEM160	1.55172e-09	0.333842	0.453	0.181	2.28956e-05
DPM1	1.57353e-09	0.26774	0.407	0.146	2.32174e-05
LPAR5	1.57738e-09	0.278383	0.407	0.146	2.32743e-05
USP3	1.64463e-09	0.289809	0.465	0.181	2.42665e-05
TBC1D3B	1.68896e-09	0.370397	0.628	0.297	2.49206e-05
CDV3	1.75398e-09	0.407103	0.919	0.629	2.588e-05
AASDHPPT	1.77108e-09	0.283484	0.337	0.111	2.61322e-05
ITGB6	1.78709e-09	0.268109	0.326	0.103	2.63684e-05
CLU	1.79017e-09	-0.790344	0.047	0.378	2.64139e-05
DNMBP	1.82188e-09	0.254057	0.302	0.091	2.68818e-05
MTX2	1.82547e-09	0.294475	0.407	0.148	2.69348e-05
PPP4C	1.84796e-09	0.367476	0.674	0.331	2.72667e-05
GPBP1	1.91678e-09	0.320406	0.453	0.179	2.82821e-05
YDJC	1.95956e-09	0.266359	0.326	0.104	2.89133e-05
CAPN1	1.96109e-09	0.371655	0.872	0.47	2.89359e-05
F11R	2.00299e-09	0.350046	0.651	0.311	2.95541e-05
SMAGP	2.00338e-09	0.267295	0.372	0.128	2.95599e-05
DPY30	2.03491e-09	0.285787	0.395	0.142	3.00251e-05
NET1	2.07415e-09	0.326805	0.651	0.299	3.0604e-05
SEM1	2.10123e-09	0.346879	0.802	0.421	3.10037e-05
GNPTAB	2.12199e-09	0.271937	0.349	0.117	3.13099e-05
QSER1	2.12429e-09	0.296328	0.395	0.143	3.13439e-05
DUOXA1	2.14064e-09	0.42351	0.802	0.466	3.15851e-05
LARP4	2.14516e-09	0.321526	0.512	0.216	3.16518e-05
ARHGEF12	2.2056e-09	0.311646	0.442	0.172	3.25436e-05
DHX15	2.21786e-09	0.316198	0.733	0.35	3.27246e-05
MAML1	2.27907e-09	0.312571	0.674	0.312	3.36277e-05
PPP1CA	2.29632e-09	0.357016	0.721	0.369	3.38822e-05
NOTCH1	2.3019e-09	0.355826	0.442	0.175	3.39646e-05
FAM193B	2.30455e-09	0.359488	0.744	0.379	3.40037e-05
SH3BP2	2.3221e-09	0.293904	0.512	0.21	3.42626e-05
COX7A2L	2.34422e-09	0.281569	0.407	0.148	3.45889e-05
AGPAT3	2.3599e-09	0.314166	0.477	0.192	3.48203e-05
LDLR	2.43636e-09	0.325527	0.453	0.181	3.59485e-05
ALDH3A2	2.44794e-09	0.449165	0.93	0.648	3.61193e-05
CAND1	2.48891e-09	0.313156	0.512	0.214	3.67238e-05
SLC38A1	2.4991e-09	0.320815	0.43	0.166	3.68742e-05
RNF141	2.50058e-09	0.3083	0.64	0.293	3.6896e-05
FAM135A	2.56252e-09	0.266959	0.43	0.16	3.781e-05
ATP6V1D	2.56909e-09	0.327551	0.523	0.226	3.79069e-05
BBS2	2.61902e-09	0.326561	0.488	0.204	3.86437e-05
GK	2.66243e-09	0.285494	0.337	0.112	3.92842e-05
IMPAD1	2.70883e-09	0.273803	0.442	0.169	3.99688e-05
ABCF1	2.72858e-09	0.33266	0.5	0.214	4.02602e-05
VEZT	2.7553e-09	0.271343	0.477	0.188	4.06545e-05
FOXP2	2.75736e-09	0.311918	0.419	0.16	4.06848e-05
SMAD2	2.83111e-09	0.328686	0.512	0.22	4.1773e-05
DNAJB2	2.85643e-09	0.354423	0.593	0.278	4.21466e-05
CCN1	2.89569e-09	-0.660973	0.047	0.361	4.2726e-05
LLGL2	2.92349e-09	0.327389	0.477	0.196	4.31361e-05
CTTN	2.98946e-09	0.358605	0.686	0.347	4.41095e-05
NGEF	3.04995e-09	0.286062	0.326	0.107	4.5002e-05
CD55	3.07017e-09	0.622572	0.721	0.453	4.53004e-05
CMPK1	3.09097e-09	0.351143	0.802	0.422	4.56073e-05
RHOB	3.12308e-09	0.625265	0.86	0.612	4.6081e-05
E4F1	3.17822e-09	0.286843	0.488	0.199	4.68946e-05
HDAC5	3.21992e-09	0.301611	0.442	0.172	4.751e-05
SLC3A2	3.25935e-09	0.335815	0.802	0.418	4.80917e-05
SMG1	3.26296e-09	0.433972	0.86	0.494	4.8145e-05
PGLS	3.30161e-09	0.362954	0.605	0.283	4.87152e-05
CD9	3.36108e-09	0.401328	1	0.857	4.95928e-05
ELOA	3.39396e-09	0.316842	0.465	0.19	5.00778e-05
NDST1	3.5681e-09	0.373461	0.674	0.341	5.26474e-05
HECTD3	3.69901e-09	0.308077	0.453	0.182	5.45789e-05
RAD9A	3.69942e-09	0.287145	0.419	0.159	5.45849e-05
TMED3	3.70169e-09	0.315631	0.57	0.256	5.46185e-05
PPP3R1	3.73958e-09	0.30243	0.512	0.215	5.51775e-05
FKBP10	3.75734e-09	-0.559787	0	0.3	5.54395e-05
SRSF8	3.78663e-09	0.305192	0.442	0.176	5.58718e-05
MTPAP	3.98227e-09	0.257949	0.349	0.117	5.87584e-05
FAM89A	4.00794e-09	0.324343	0.453	0.185	5.91371e-05
HTRA1	4.01183e-09	-0.64806	0.081	0.395	5.91946e-05
UFC1	4.05647e-09	0.277239	0.465	0.185	5.98533e-05
AC118549.1	4.06199e-09	0.259898	0.326	0.106	5.99347e-05
DDB1	4.08287e-09	0.294998	0.616	0.277	6.02428e-05
PDZD2	4.09004e-09	0.319217	0.43	0.168	6.03486e-05
HYAL1	4.09912e-09	0.312963	0.384	0.142	6.04825e-05
ARL2BP	4.14762e-09	0.277152	0.407	0.152	6.11981e-05
RALGPS1	4.20858e-09	0.26155	0.302	0.094	6.20976e-05
SCAMP2	4.28649e-09	0.333975	0.651	0.32	6.32471e-05
STK38	4.31362e-09	0.300611	0.395	0.147	6.36474e-05
KPNA1	4.42411e-09	0.2853	0.512	0.214	6.52777e-05
FARSA	4.65953e-09	0.293325	0.488	0.2	6.87513e-05
RAB5IF	4.67552e-09	0.335027	0.744	0.382	6.89873e-05
TUFM	4.71348e-09	0.336785	0.779	0.395	6.95475e-05
ANO1	4.91656e-09	0.412818	0.407	0.162	7.25439e-05
UBXN4	5.02412e-09	0.343711	0.674	0.328	7.41308e-05
EIF2S1	5.07688e-09	0.348748	0.465	0.198	7.49094e-05
PLEKHG5	5.09173e-09	0.393579	0.686	0.359	7.51284e-05
JPT1	5.10831e-09	0.343794	0.698	0.35	7.53731e-05
NYNRIN	5.1176e-09	0.293877	0.442	0.174	7.55102e-05
VAMP3	5.20114e-09	0.339016	0.698	0.355	7.67429e-05
PCYT1A	5.23516e-09	0.271255	0.535	0.227	7.72447e-05
CHFR	5.24323e-09	0.301724	0.43	0.171	7.73638e-05
FDX1	5.31347e-09	0.275615	0.372	0.133	7.84002e-05
USP14	5.35215e-09	0.312282	0.488	0.206	7.8971e-05
EBNA1BP2	5.49602e-09	0.287181	0.535	0.227	8.10937e-05
CRISPLD2	5.52605e-09	-0.631203	0.012	0.311	8.15369e-05
COL11A1	5.54785e-09	-0.679102	0.012	0.311	8.18585e-05
PKP4	5.75838e-09	0.313583	0.593	0.268	8.49649e-05
SDR39U1	5.79836e-09	0.315848	0.512	0.221	8.55548e-05
FBXW2	5.84961e-09	0.263822	0.453	0.178	8.63109e-05
TBC1D10B	5.89999e-09	0.285927	0.419	0.161	8.70544e-05
DDX55	5.99503e-09	0.258156	0.477	0.187	8.84566e-05
ASXL2	6.05913e-09	0.312007	0.36	0.131	8.94025e-05
MDM4	6.19457e-09	0.322957	0.779	0.397	9.14009e-05
VAMP8	6.42403e-09	0.372477	0.791	0.438	9.47866e-05
R3HDM4	6.43636e-09	0.32431	0.581	0.269	9.49685e-05
CCNK	6.44283e-09	0.266043	0.36	0.126	9.50639e-05
GYS1	6.49707e-09	0.283836	0.477	0.197	9.58643e-05
TMEM259	6.56682e-09	0.338484	0.977	0.629	9.68934e-05
LSM14A	6.60768e-09	0.287588	0.5	0.209	9.74963e-05
PYGO2	6.76267e-09	0.29327	0.419	0.162	9.97833e-05
PRPF38B	6.94047e-09	0.298038	0.442	0.176	0.000102407
MAPKAPK5	6.98114e-09	0.306995	0.488	0.206	0.000103007
KSR1	6.98375e-09	0.296813	0.465	0.191	0.000103045
HARS2	7.10166e-09	0.27066	0.337	0.115	0.000104785
KAT2A	7.25768e-09	0.311076	0.523	0.227	0.000107087
LSR	7.36451e-09	0.373467	0.651	0.318	0.000108663
SMPDL3A	7.45017e-09	0.329521	0.372	0.138	0.000109927
BHLHE40	7.45559e-09	0.517201	0.779	0.462	0.000110007
ISOC1	7.51586e-09	0.27885	0.314	0.104	0.000110896
C1orf43	7.52528e-09	0.349287	0.547	0.25	0.000111036
RHCG	7.55962e-09	-1.18523	0.523	0.771	0.000111542
SLC25A25	7.62236e-09	0.350281	0.384	0.147	0.000112468
ABI1	7.89426e-09	0.361957	0.709	0.384	0.00011648
NOP53	7.93627e-09	0.3461	1	0.691	0.0001171
CPSF4	7.99808e-09	0.288555	0.442	0.175	0.000118012
BRD2	8.05411e-09	0.3677	0.849	0.485	0.000118838
WDR83OS	8.19215e-09	0.333949	0.651	0.322	0.000120875
UPF1	8.33647e-09	0.32001	0.535	0.239	0.000123005
PAPSS1	8.36295e-09	0.340314	0.5	0.219	0.000123395
UBQLN1	8.40062e-09	0.318914	0.558	0.254	0.000123951
VDAC1	8.41637e-09	0.371443	0.616	0.31	0.000124184
LNPEP	8.42006e-09	0.302312	0.512	0.221	0.000124238
FOXP4	8.48413e-09	0.257322	0.314	0.102	0.000125183
UBA2	8.51666e-09	0.309741	0.512	0.224	0.000125663
NR1H2	8.77489e-09	0.318506	0.523	0.233	0.000129474
PPIL3	8.78829e-09	0.263392	0.326	0.109	0.000129671
ENO1	8.94235e-09	0.401732	1	0.865	0.000131944
SSH3	9.06262e-09	0.377795	0.57	0.278	0.000133719
CNKSR3	9.07381e-09	0.293867	0.407	0.157	0.000133884
PSMF1	9.09922e-09	0.318914	0.558	0.256	0.000134259
ELP2	9.20611e-09	0.263329	0.419	0.159	0.000135836
PRPF40A	9.25215e-09	0.322449	0.605	0.283	0.000136515
RAB35	9.35634e-09	0.318234	0.593	0.278	0.000138053
ANKRD17	9.38002e-09	0.322607	0.523	0.231	0.000138402
FZR1	9.54473e-09	0.29036	0.465	0.192	0.000140833
IKZF2	9.81223e-09	0.275463	0.407	0.155	0.000144779
RNH1	9.90873e-09	0.397945	0.919	0.67	0.000146203
XPO1	9.953e-09	0.262294	0.465	0.188	0.000146857
UBE2D2	1.0061e-08	0.291746	0.581	0.265	0.000148451
RASSF5	1.04576e-08	0.346202	0.453	0.193	0.000154302
HSP90AB1	1.06435e-08	0.401009	0.953	0.651	0.000157044
ATP5F1B	1.0745e-08	0.366079	0.977	0.715	0.000158542
TIMP3	1.09576e-08	-0.710579	0.047	0.344	0.000161679
FBXO46	1.09779e-08	0.304306	0.395	0.154	0.000161979
LNX2	1.11653e-08	0.272241	0.407	0.157	0.000164744
MCCC1	1.12433e-08	0.311646	0.43	0.172	0.000165895
EIF4G2	1.1336e-08	0.344372	0.988	0.828	0.000167262
NELFA	1.14753e-08	0.266435	0.349	0.123	0.000169318
CYBA	1.15492e-08	-0.659584	0.035	0.331	0.000170408
SZRD1	1.19455e-08	0.316813	0.709	0.366	0.000176256
EXOC5	1.20382e-08	0.295082	0.407	0.159	0.000177624
KRT14	1.20401e-08	0.348539	1	1	0.000177652
RASSF10	1.25364e-08	0.305027	0.442	0.181	0.000184975
RRP1	1.27954e-08	0.291534	0.453	0.188	0.000188796
TNFRSF25	1.2853e-08	0.379552	0.593	0.295	0.000189646
ATP11A	1.3051e-08	0.355447	0.407	0.166	0.000192567
PRKD2	1.3142e-08	0.315429	0.581	0.273	0.00019391
UBN2	1.31453e-08	0.31097	0.384	0.147	0.000193959
PPP2R5A	1.31652e-08	0.326602	0.547	0.25	0.000194252
MREG	1.33424e-08	0.257949	0.349	0.123	0.000196867
SUPT6H	1.36458e-08	0.27855	0.628	0.29	0.000201344
YARS	1.38226e-08	0.304362	0.465	0.197	0.000203952
TTC37	1.38695e-08	0.282353	0.488	0.207	0.000204644
ERC1	1.38912e-08	0.306995	0.5	0.222	0.000204965
C9orf78	1.38974e-08	0.257627	0.372	0.137	0.000205056
POLDIP2	1.4018e-08	0.303064	0.477	0.203	0.000206835
EEA1	1.41094e-08	0.300238	0.477	0.204	0.000208184
EIF2B1	1.41215e-08	0.300768	0.488	0.211	0.000208363
BTF3L4	1.42194e-08	0.269384	0.419	0.165	0.000209808
C6orf62	1.43813e-08	0.303928	0.535	0.243	0.000212196
EIF2S3	1.44788e-08	0.323234	0.791	0.414	0.000213634
INO80B	1.46459e-08	0.275735	0.721	0.345	0.000216101
QARS	1.48793e-08	0.352821	0.674	0.348	0.000219545
TBRG4	1.50578e-08	0.346005	0.488	0.219	0.000222178
BRD1	1.50862e-08	0.288492	0.674	0.324	0.000222596
S100A7	1.53455e-08	-1.36449	0.256	0.566	0.000226423
TRAP1	1.55185e-08	0.352138	0.744	0.404	0.000228975
VCP	1.5556e-08	0.343246	0.86	0.481	0.000229528
CARM1	1.55998e-08	0.323527	0.453	0.194	0.000230176
VPS28	1.60183e-08	0.325076	0.709	0.36	0.00023635
SUGT1	1.60957e-08	0.275011	0.419	0.166	0.000237492
EHBP1	1.61573e-08	0.292813	0.535	0.237	0.000238401
UTP4	1.66201e-08	0.255054	0.302	0.099	0.000245229
CTSD	1.70193e-08	0.341902	0.977	0.865	0.00025112
SIN3A	1.73419e-08	0.264417	0.372	0.138	0.00025588
MSL1	1.73465e-08	0.281197	0.628	0.289	0.000255948
PPP6C	1.76862e-08	0.284185	0.43	0.176	0.00026096
COL5A2	1.79045e-08	-0.560409	0.023	0.311	0.000264181
HIVEP3	1.83036e-08	0.298214	0.36	0.134	0.000270069
UBAP2L	1.85029e-08	0.319657	0.581	0.277	0.000273011
KRT6B	1.85199e-08	0.74593	0.988	0.993	0.000273261
SOX2	1.85444e-08	0.284386	0.36	0.134	0.000273623
LGALSL	1.86193e-08	0.537441	0.767	0.476	0.000274728
SELENOM	1.89348e-08	-0.521458	0.012	0.295	0.000279384
KHDC4	1.92834e-08	0.3259	0.593	0.281	0.000284527
RSL1D1	1.9352e-08	0.326582	0.674	0.337	0.000285538
SLC2A4RG	1.9683e-08	0.374049	0.826	0.457	0.000290423
WIPF2	1.98222e-08	0.328998	0.5	0.224	0.000292477
HMGCR	2.02627e-08	0.494813	0.477	0.23	0.000298977
TIPRL	2.03591e-08	0.288264	0.372	0.139	0.000300398
EMC7	2.05042e-08	0.318074	0.465	0.201	0.00030254
PLXND1	2.0552e-08	-0.543109	0.012	0.294	0.000303245
KCTD3	2.06395e-08	0.256684	0.337	0.118	0.000304536
LAMA4	2.09742e-08	-0.550835	0.023	0.309	0.000309474
PRRC2B	2.09805e-08	0.410262	0.907	0.589	0.000309567
DOK4	2.11063e-08	0.277152	0.395	0.154	0.000311423
HLA-DRA	2.1235e-08	-0.763585	0.058	0.349	0.000313323
SS18L1	2.12775e-08	0.274445	0.465	0.195	0.000313949
STX17	2.16675e-08	0.256394	0.419	0.165	0.000319705
GPR87	2.20973e-08	0.261188	0.314	0.107	0.000326046
TARBP1	2.22462e-08	0.28471	0.395	0.153	0.000328243
MLLT10	2.23452e-08	0.252496	0.43	0.172	0.000329704
YME1L1	2.24676e-08	0.323234	0.57	0.279	0.000331509
SF3B6	2.26584e-08	0.306287	0.558	0.261	0.000334325
ATP6V0D1	2.27629e-08	0.303353	0.744	0.392	0.000335866
NPTN	2.34732e-08	0.301027	0.64	0.307	0.000346347
STRN3	2.37118e-08	0.301805	0.5	0.222	0.000349867
MFN1	2.38864e-08	0.311935	0.547	0.255	0.000352444
SLC25A46	2.40788e-08	0.27861	0.337	0.121	0.000355283
YWHAG	2.40877e-08	0.333882	0.907	0.532	0.000355414
CYCS	2.42705e-08	0.362696	0.547	0.259	0.000358111
SAMM50	2.4574e-08	0.255767	0.384	0.146	0.000362589
TENT4A	2.48207e-08	0.251552	0.419	0.166	0.000366229
ULK1	2.53266e-08	0.330073	0.593	0.293	0.000373694
LAMTOR2	2.53432e-08	0.255725	0.337	0.12	0.000373939
MAP1B	2.54966e-08	-0.521293	0.035	0.326	0.000376202
WSB1	2.59027e-08	0.356019	0.756	0.442	0.000382194
PCNX3	2.62145e-08	0.264417	0.5	0.215	0.000386796
RAD50	2.62591e-08	0.295054	0.465	0.2	0.000387453
CACNB3	2.67277e-08	0.26155	0.291	0.095	0.000394367
AKT2	2.68085e-08	0.292367	0.593	0.273	0.000395559
CST3	2.69389e-08	0.302289	0.965	0.892	0.000397484
HDLBP	2.7696e-08	0.334908	0.919	0.582	0.000408654
CCT5	2.77112e-08	0.32753	0.663	0.326	0.000408879
PSMA4	2.77142e-08	0.34923	0.709	0.384	0.000408923
KIAA1211L	2.80245e-08	0.272389	0.302	0.101	0.000413502
OSBPL1A	2.82946e-08	0.292624	0.36	0.133	0.000417487
MTERF4	2.96211e-08	0.294475	0.512	0.225	0.00043706
ELMO3	2.99831e-08	0.268568	0.384	0.146	0.000442401
FBXO21	3.00741e-08	0.2598	0.36	0.133	0.000443744
METTL17	3.05384e-08	0.318029	0.43	0.18	0.000450595
EMD	3.05632e-08	0.316411	0.558	0.265	0.000450961
PRPF19	3.07914e-08	0.365813	0.512	0.245	0.000454327
SYPL1	3.11055e-08	0.309741	0.547	0.257	0.000458962
BRK1	3.11424e-08	0.336322	0.686	0.379	0.000459506
STOML2	3.16457e-08	0.272107	0.465	0.197	0.000466932
GRSF1	3.18342e-08	0.304132	0.57	0.269	0.000469714
RAE1	3.19469e-08	0.268548	0.36	0.135	0.000471376
FUBP3	3.26546e-08	0.280939	0.523	0.235	0.000481818
CPSF7	3.27295e-08	0.303928	0.512	0.23	0.000482923
RRP36	3.27674e-08	0.283836	0.453	0.192	0.000483483
AP2S1	3.33956e-08	0.381328	0.895	0.558	0.000492751
SIRT7	3.34053e-08	0.298359	0.523	0.237	0.000492895
SOD1	3.40897e-08	0.391003	0.814	0.46	0.000502993
ZNF131	3.42494e-08	0.279604	0.442	0.185	0.000505351
DDX27	3.47113e-08	0.254157	0.337	0.12	0.000512166
CCN2	3.50503e-08	-0.546036	0.012	0.287	0.000517167
PCYOX1	3.52279e-08	0.276299	0.547	0.252	0.000519788
GRIPAP1	3.5268e-08	0.277959	0.453	0.191	0.000520379
FAM20B	3.61378e-08	0.25275	0.279	0.089	0.000533214
DAB2IP	3.63239e-08	0.296813	0.453	0.192	0.000535959
CYTH2	3.64455e-08	0.322354	0.779	0.433	0.000537753
SUFU	3.71686e-08	0.269384	0.442	0.183	0.000548423
COX5A	3.77015e-08	0.349094	0.849	0.534	0.000556285
HACD2	3.77813e-08	0.264156	0.291	0.097	0.000557464
GOT2	3.80662e-08	0.286959	0.477	0.207	0.000561666
ITPA	3.84082e-08	0.264868	0.5	0.214	0.000566714
FOXK2	3.84858e-08	0.317436	0.523	0.242	0.000567858
EFNB1	3.86511e-08	0.299228	0.419	0.173	0.000570297
PTPA	3.87484e-08	0.302707	0.616	0.306	0.000571732
ZNF185	3.90476e-08	0.313064	0.884	0.521	0.000576148
VDAC2	4.11238e-08	0.335951	0.64	0.335	0.000606782
PLEKHJ1	4.23319e-08	0.280788	0.43	0.177	0.000624607
TUBGCP2	4.34184e-08	0.286185	0.535	0.246	0.000640638
NFATC4	4.34729e-08	-0.483279	0.012	0.284	0.000641442
CUL5	4.38525e-08	0.259215	0.337	0.123	0.000647044
SLC25A23	4.41553e-08	0.279852	0.407	0.164	0.000651511
OTUB1	4.46315e-08	0.338004	0.721	0.399	0.000658538
IGFBP2	4.69553e-08	0.36206	0.977	0.675	0.000692826
SAFB	4.70767e-08	0.345365	0.674	0.347	0.000694617
TTC23	4.72565e-08	0.254451	0.326	0.116	0.00069727
DDX19B	4.73374e-08	0.254157	0.337	0.122	0.000698464
MYL9	4.7425e-08	-0.574987	0.012	0.283	0.000699755
TBRG1	4.7589e-08	0.303179	0.535	0.25	0.000702176
GLUL	4.84691e-08	-0.930627	0.535	0.773	0.000715162
ASCC2	4.88521e-08	0.262468	0.395	0.156	0.000720813
PAN3	4.88974e-08	0.334096	0.465	0.207	0.000721481
FKBP8	4.90276e-08	0.327565	0.942	0.722	0.000723402
HEXIM1	4.94286e-08	0.322499	0.558	0.274	0.000729319
CCDC120	4.95045e-08	0.342103	0.5	0.236	0.000730439
CKAP4	5.11811e-08	0.34997	0.884	0.55	0.000755177
RAB7A	5.31463e-08	0.355293	0.86	0.534	0.000784173
CRY1	5.39865e-08	0.250409	0.267	0.085	0.000796571
NDUFS8	5.59111e-08	0.332164	0.57	0.28	0.000824968
UBE2E2	5.64694e-08	0.286806	0.698	0.365	0.000833205
ITPRID2	5.68843e-08	0.276407	0.523	0.236	0.000839327
TRAPPC5	5.69071e-08	0.292904	0.593	0.285	0.000839664
GNB1	5.69916e-08	0.299001	0.744	0.385	0.00084091
SMIM15	5.7549e-08	0.260704	0.372	0.143	0.000849135
PCSK7	5.76701e-08	0.288563	0.57	0.269	0.000850923
NSMAF	5.7917e-08	0.258233	0.372	0.143	0.000854565
RARRES2	5.90153e-08	-0.499477	0.012	0.28	0.00087077
ISG20L2	5.96958e-08	0.266898	0.36	0.137	0.000880811
PRICKLE2	6.02217e-08	0.270569	0.43	0.181	0.000888571
HERC2	6.03e-08	0.273699	0.442	0.187	0.000889726
SART1	6.06626e-08	0.262791	0.477	0.208	0.000895077
PLPP3	6.09345e-08	-0.602311	0.081	0.362	0.000899089
NFYC	6.27319e-08	0.26282	0.384	0.15	0.000925609
NDUFS1	6.29098e-08	0.292243	0.512	0.237	0.000928235
FBXO3	6.31294e-08	0.252895	0.349	0.131	0.000931474
ATP6V1F	6.43923e-08	0.252496	0.43	0.18	0.000950109
PSMD14	6.44891e-08	0.286599	0.407	0.168	0.000951537
ATOX1	6.48436e-08	0.293449	0.628	0.31	0.000956767
PRPF39	6.48916e-08	0.31292	0.57	0.277	0.000957476
ABCE1	6.54751e-08	0.273215	0.314	0.112	0.000966085
TGM7	6.59417e-08	0.45437	0.36	0.143	0.000972971
BACE1	6.61765e-08	0.264049	0.372	0.145	0.000976434
BUB3	6.84163e-08	0.263741	0.512	0.23	0.00100948
UBXN6	6.92959e-08	0.351647	0.802	0.455	0.00102246
AGGF1	7.02942e-08	0.285159	0.465	0.205	0.00103719
EMC9	7.20125e-08	0.263392	0.314	0.112	0.00106254
BOP1	7.2617e-08	0.280524	0.465	0.204	0.00107146
NADSYN1	7.30537e-08	0.300768	0.465	0.206	0.00107791
NDUFAB1	7.36243e-08	0.271391	0.407	0.167	0.00108633
FN3KRP	7.3738e-08	0.265562	0.326	0.119	0.001088
PRICKLE3	7.47919e-08	0.262654	0.349	0.133	0.00110355
NFX1	7.48788e-08	0.25469	0.477	0.206	0.00110484
MFAP4	7.5596e-08	-0.501992	0	0.26	0.00111542
FAM174C	7.71397e-08	0.292737	0.465	0.208	0.0011382
MTA2	7.77425e-08	0.289421	0.628	0.312	0.00114709
SRSF9	7.79222e-08	0.31442	0.512	0.241	0.00114974
BPIFC	7.81151e-08	0.29016	0.326	0.118	0.00115259
GLYR1	8.07209e-08	0.316485	0.57	0.284	0.00119104
ESF1	8.12819e-08	0.262294	0.349	0.132	0.00119931
NDUFA11	8.16254e-08	0.303435	0.767	0.419	0.00120438
SCD	8.23977e-08	0.316689	0.57	0.273	0.00121578
CUL9	8.24166e-08	0.282353	0.477	0.212	0.00121606
NFAT5	8.27894e-08	0.335186	0.616	0.318	0.00122156
MX2	8.34397e-08	0.28284	0.453	0.196	0.00123115
LGALS3	8.4097e-08	0.289636	0.86	0.465	0.00124085
DVL3	8.46484e-08	0.323534	0.663	0.352	0.00124899
KDM5A	8.48483e-08	0.264177	0.407	0.166	0.00125194
TSR1	8.6665e-08	0.251552	0.407	0.165	0.00127874
GPR107	8.72913e-08	0.267072	0.465	0.202	0.00128798
TAF10	8.7385e-08	0.271676	0.698	0.353	0.00128937
ADAMTS2	8.76547e-08	-0.48666	0	0.258	0.00129335
CSAD	8.79083e-08	0.303283	0.581	0.279	0.00129709
HSPA5	8.97723e-08	-0.546115	0.64	0.787	0.00132459
ZNF460	9.35726e-08	0.277057	0.477	0.214	0.00138066
RAB11A	9.40298e-08	0.319748	0.837	0.446	0.00138741
PNP	9.49816e-08	0.282244	0.512	0.234	0.00140145
HNRNPD	9.73443e-08	0.34233	0.86	0.513	0.00143632
URI1	9.74816e-08	0.277762	0.477	0.213	0.00143834
AP1G1	9.82889e-08	0.262979	0.419	0.175	0.00145025
ZNF609	9.93775e-08	0.296068	0.57	0.272	0.00146632
OAT	1.00208e-07	0.443774	0.523	0.271	0.00147858
CNP	1.00938e-07	0.326602	0.512	0.248	0.00148934
BOC	1.02432e-07	0.323778	0.686	0.347	0.00151138
FAM162A	1.04378e-07	0.318627	0.581	0.284	0.0015401
TRIP6	1.05453e-07	0.296126	0.814	0.435	0.00155597
GDI2	1.07092e-07	0.294964	0.651	0.341	0.00158014
ST6GALNAC2	1.07333e-07	0.325746	0.43	0.187	0.00158369
MBNL2	1.08414e-07	0.323567	0.558	0.283	0.00159964
MPHOSPH10	1.08495e-07	0.291706	0.523	0.25	0.00160085
SLC30A1	1.08508e-07	0.282659	0.43	0.184	0.00160104
HNRNPC	1.10414e-07	0.320541	0.837	0.462	0.00162916
DDX1	1.12191e-07	0.29556	0.547	0.267	0.00165538
AFAP1L2	1.1376e-07	0.335178	0.477	0.225	0.00167853
ITM2A	1.15797e-07	0.290484	0.465	0.207	0.00170859
CLASP1	1.19075e-07	0.284865	0.407	0.171	0.00175695
GLO1	1.215e-07	0.270939	0.453	0.201	0.00179274
IFI6	1.22149e-07	-0.761651	0.407	0.615	0.00180231
COPS5	1.23858e-07	0.271812	0.395	0.164	0.00182753
ATF3	1.24765e-07	0.61769	0.477	0.246	0.00184091
POLR2B	1.25241e-07	0.265395	0.547	0.259	0.00184793
POLE3	1.28217e-07	0.308347	0.442	0.196	0.00189185
SEC23IP	1.28247e-07	0.262122	0.407	0.17	0.00189228
NAPA	1.28545e-07	0.334243	0.884	0.571	0.00189667
TRABD	1.32751e-07	0.253125	0.605	0.288	0.00195874
ATP6V0A1	1.34119e-07	0.32628	0.5	0.242	0.00197892
UNG	1.34192e-07	0.252076	0.372	0.147	0.00198001
GART	1.37925e-07	0.257291	0.453	0.196	0.00203508
MPLKIP	1.38292e-07	0.259215	0.326	0.121	0.00204049
BRI3BP	1.40216e-07	0.264905	0.395	0.164	0.00206889
TAX1BP3	1.42226e-07	0.261993	0.581	0.276	0.00209854
RAB22A	1.44808e-07	0.265834	0.43	0.185	0.00213664
PTGFRN	1.46365e-07	0.329583	0.628	0.321	0.00215962
PWP1	1.50333e-07	0.257311	0.349	0.135	0.00221817
TGFBR3	1.52758e-07	0.28313	0.326	0.123	0.00225395
FARSB	1.53044e-07	0.290229	0.384	0.159	0.00225817
KLC1	1.53281e-07	0.320828	0.814	0.479	0.00226166
SLC26A2	1.55321e-07	0.258882	0.337	0.128	0.00229176
PPP3CA	1.57817e-07	0.250594	0.384	0.154	0.00232858
PTS	1.59182e-07	0.261308	0.453	0.195	0.00234873
DDX21	1.6185e-07	0.289061	0.547	0.263	0.00238809
ZSWIM8	1.64378e-07	0.276812	0.57	0.278	0.0024254
UBE4B	1.64771e-07	0.283078	0.605	0.301	0.0024312
OAZ1	1.64998e-07	0.350399	0.977	0.776	0.00243455
PA2G4	1.67316e-07	0.326948	0.826	0.478	0.00246874
PACS1	1.71693e-07	0.295643	0.43	0.188	0.00253332
MAX	1.77337e-07	0.333633	0.709	0.409	0.0026166
NSMF	1.79622e-07	0.303404	0.57	0.283	0.00265032
WDTC1	1.81981e-07	0.311646	0.419	0.188	0.00268514
FTSJ3	1.87889e-07	0.252895	0.43	0.182	0.0027723
N4BP2L2	1.9178e-07	0.303377	0.616	0.313	0.00282972
EFNB2	1.96333e-07	0.252761	0.384	0.155	0.00289689
COL18A1	1.99276e-07	-0.569106	0.128	0.399	0.00294031
RBM15B	1.9933e-07	0.260268	0.535	0.25	0.00294112
FGFR2	1.9982e-07	0.289566	0.512	0.243	0.00294834
DNPEP	2.04434e-07	0.259544	0.477	0.213	0.00301642
PAIP2B	2.06639e-07	0.250141	0.279	0.097	0.00304897
GPAA1	2.06767e-07	0.278061	0.535	0.254	0.00305085
SNX2	2.07319e-07	0.251552	0.384	0.155	0.00305899
PITX2	2.07598e-07	0.267234	0.802	0.433	0.00306312
DUOX1	2.08802e-07	0.35847	0.779	0.471	0.00308087
VDAC3	2.12711e-07	0.282141	0.558	0.271	0.00313856
HDGF	2.12864e-07	0.336213	0.953	0.716	0.00314081
LARP4B	2.13811e-07	0.308683	0.558	0.279	0.00315477
CEBPD	2.15367e-07	0.308028	0.849	0.486	0.00317774
UBE2K	2.15659e-07	0.250555	0.453	0.201	0.00318205
RALGDS	2.19712e-07	0.316858	0.558	0.281	0.00324186
SPTSSA	2.23186e-07	0.299701	0.43	0.192	0.00329311
AHSA1	2.30143e-07	0.287588	0.558	0.273	0.00339575
DNAJC21	2.33071e-07	0.272448	0.453	0.203	0.00343896
DHX9	2.34216e-07	0.281403	0.477	0.219	0.00345586
IMPDH2	2.35319e-07	0.31749	0.523	0.252	0.00347213
GTF2H1	2.37912e-07	0.257917	0.384	0.159	0.00351039
ECM1	2.41869e-07	-0.90558	0.07	0.332	0.00356877
TSC22D3	2.41909e-07	-0.695533	0.326	0.548	0.00356936
ANXA5	2.42329e-07	-0.570809	0.14	0.406	0.00357557
KCNJ15	2.42923e-07	0.346588	0.407	0.178	0.00358433
MFGE8	2.46194e-07	0.262429	0.686	0.347	0.00363259
EFTUD2	2.46994e-07	0.278457	0.477	0.22	0.00364439
GALNT7	2.47995e-07	0.256068	0.349	0.138	0.00365917
ATF4	2.54698e-07	0.288804	0.593	0.306	0.00375807
CCDC86	2.58065e-07	0.264417	0.36	0.146	0.00380774
GSPT1	2.60756e-07	0.305852	0.477	0.228	0.00384745
INTS10	2.65875e-07	0.296241	0.419	0.186	0.00392298
ZXDC	2.67132e-07	0.257569	0.488	0.226	0.00394153
ATP5PF	2.68071e-07	0.271821	0.593	0.294	0.00395538
SCPEP1	2.68799e-07	0.269384	0.523	0.25	0.00396613
MYOF	2.69461e-07	0.303941	0.721	0.386	0.00397589
GPNMB	2.69624e-07	0.354587	0.733	0.426	0.00397831
HERC4	2.7097e-07	0.25476	0.5	0.23	0.00399816
BUD23	2.72448e-07	0.272044	0.465	0.212	0.00401997
TRIM26	2.74944e-07	0.310986	0.57	0.29	0.00405679
ZC3H8	2.7557e-07	0.271016	0.372	0.152	0.00406604
PALMD	2.80466e-07	0.378736	0.558	0.294	0.00413828
MICOS10	2.80746e-07	0.255239	0.628	0.31	0.00414241
CRKL	2.82129e-07	0.256713	0.453	0.202	0.00416281
RAB11B	2.82698e-07	0.255438	0.593	0.293	0.00417121
MXD3	2.9242e-07	0.251046	0.395	0.164	0.00431465
ARPC1B	2.97527e-07	-0.495324	0.07	0.332	0.00439001
KCTD12	3.05827e-07	-0.518112	0.035	0.289	0.00451247
RAB18	3.1311e-07	0.31715	0.663	0.362	0.00461994
SULF2	3.13436e-07	0.435929	0.686	0.405	0.00462475
GRN	3.17288e-07	0.330055	0.721	0.412	0.00468159
LOR	3.197e-07	-1.7302	0.581	0.772	0.00471717
SLBP	3.24856e-07	0.268992	0.43	0.191	0.00479325
RAD23A	3.29304e-07	0.300644	0.581	0.295	0.00485888
DOCK9	3.32684e-07	0.31156	0.593	0.301	0.00490875
EPHA1	3.33033e-07	0.298601	0.407	0.18	0.00491389
ATF7	3.39399e-07	0.267395	0.407	0.175	0.00500784
CXXC1	3.47295e-07	0.290762	0.547	0.277	0.00512434
CD24	3.57854e-07	0.306832	0.872	0.545	0.00528014
IDH3B	3.63438e-07	0.264763	0.453	0.204	0.00536253
SRSF2	3.73047e-07	0.350976	0.942	0.66	0.00550431
NOP2	3.74115e-07	0.261116	0.43	0.191	0.00552006
UCKL1	3.80519e-07	0.269772	0.442	0.201	0.00561455
GAS1	3.81226e-07	-0.715272	0.36	0.576	0.00562499
NDUFV1	3.81288e-07	0.312232	0.756	0.437	0.0056259
CTHRC1	3.86872e-07	-0.437538	0	0.238	0.0057083
TNFAIP2	3.90528e-07	0.275336	0.477	0.224	0.00576225
WDR33	3.94595e-07	0.286792	0.523	0.26	0.00582225
OLFM2	4.11196e-07	0.297421	0.395	0.171	0.0060672
ISG15	4.15986e-07	-0.522961	0.035	0.285	0.00613787
NCAPH2	4.17854e-07	0.264538	0.384	0.162	0.00616544
ZNF326	4.18177e-07	0.252076	0.36	0.147	0.00617021
EXOC4	4.30177e-07	0.299546	0.477	0.229	0.00634726
ANKLE2	4.30945e-07	0.266933	0.558	0.271	0.0063586
IQGAP1	4.46689e-07	0.314327	0.756	0.458	0.0065909
SEPTIN5	4.58851e-07	0.335512	0.43	0.202	0.00677035
FBXO7	4.60596e-07	0.267854	0.453	0.208	0.0067961
APOD	4.61999e-07	-0.692955	0.047	0.301	0.00681679
GPAT4	4.96844e-07	0.266203	0.407	0.178	0.00733093
FTL	5.02442e-07	-0.636551	0.733	0.776	0.00741353
MMS19	5.03443e-07	0.278421	0.419	0.189	0.0074283
GTF3C2	5.10703e-07	0.265115	0.453	0.21	0.00753542
PPP4R1	5.12234e-07	0.260989	0.477	0.225	0.00755802
SIN3B	5.14198e-07	0.270206	0.36	0.151	0.00758699
DUSP6	5.16717e-07	0.388368	0.43	0.204	0.00762416
CHTOP	5.21423e-07	0.29082	0.709	0.395	0.00769359
NAA20	5.23808e-07	0.272536	0.686	0.361	0.00772878
SDR9C7	5.34979e-07	0.258948	0.384	0.158	0.00789361
TNKS2	5.53542e-07	0.255695	0.779	0.422	0.00816751
ODC1	5.72405e-07	0.540218	0.442	0.226	0.00844584
AUTS2	5.83491e-07	0.272313	0.628	0.327	0.00860941
BECN1	5.89675e-07	0.286901	0.523	0.257	0.00870065
KDM3B	5.92216e-07	0.272521	0.419	0.189	0.00873815
PYGB	6.07501e-07	0.276455	0.465	0.215	0.00896368
RELCH	6.10709e-07	0.316143	0.721	0.409	0.00901101
LGALS8	6.16622e-07	0.256413	0.43	0.193	0.00909826
CCT7	6.17052e-07	0.278521	0.558	0.28	0.00910461
MGST3	6.24074e-07	0.277821	0.512	0.252	0.00920822
SPNS2	6.31259e-07	-0.693532	0.023	0.267	0.00931422
WASF2	6.31343e-07	0.292568	0.86	0.532	0.00931547
IRX4	6.36724e-07	0.267017	0.407	0.177	0.00939486
PSMB6	6.39563e-07	0.273242	0.57	0.291	0.00943675
TENM4	6.43021e-07	0.263913	0.314	0.122	0.00948777
COX7C	6.43025e-07	0.295328	0.767	0.419	0.00948784
STX7	6.53604e-07	0.251725	0.43	0.193	0.00964393
PCBP2	6.58494e-07	0.267395	0.628	0.33	0.00971608
GTPBP1	6.69866e-07	0.284559	0.57	0.296	0.00988387
NDUFS5	6.70978e-07	0.296201	0.756	0.425	0.00990028
SMARCE1	6.71761e-07	0.259149	0.663	0.344	0.00991183
CSNK1D	6.93334e-07	0.254234	0.616	0.308	0.0102301
EPS8L2	6.939e-07	0.283846	0.919	0.657	0.0102385
DHX36	7.01978e-07	0.261116	0.419	0.187	0.0103577
ENDOU	7.03675e-07	0.352707	0.465	0.23	0.0103827
SLC2A1	7.31162e-07	0.311396	0.663	0.35	0.0107883
KRIT1	7.33416e-07	0.256098	0.384	0.165	0.0108215
ARIH1	7.38056e-07	0.277946	0.756	0.417	0.01089
ATP5F1A	7.39809e-07	0.272562	0.547	0.274	0.0109159
THY1	7.46895e-07	-0.434615	0.012	0.246	0.0110204
PMEPA1	7.55512e-07	-0.467582	0.047	0.292	0.0111476
GRHL3	7.60587e-07	0.42154	0.686	0.422	0.0112225
AJUBA	7.66333e-07	0.274019	0.43	0.198	0.0113072
COX7A2	8.10914e-07	0.300696	0.651	0.358	0.011965
RCC2	8.12093e-07	0.257507	0.616	0.32	0.0119824
SEMA4D	8.12669e-07	0.270489	0.5	0.241	0.0119909
STK25	8.12983e-07	0.252039	0.5	0.237	0.0119956
NCK2	8.1722e-07	0.266335	0.721	0.402	0.0120581
MAU2	8.17534e-07	0.261308	0.442	0.202	0.0120627
TRIM28	8.21548e-07	0.272941	0.721	0.395	0.0121219
NPLOC4	8.24149e-07	0.263543	0.523	0.259	0.0121603
PNRC1	8.25158e-07	0.321426	0.744	0.431	0.0121752
U2AF2	8.27021e-07	0.340013	0.64	0.362	0.0122027
ARRDC1	8.32012e-07	0.262942	0.465	0.22	0.0122763
CLIP1	8.34353e-07	0.265377	0.791	0.456	0.0123109
ETV3	8.3521e-07	0.259624	0.43	0.196	0.0123235
ENY2	8.36693e-07	0.252761	0.372	0.158	0.0123454
COL4A1	8.36849e-07	-0.440724	0	0.227	0.0123477
ZNF207	8.37739e-07	0.274995	0.616	0.324	0.0123608
PYGL	8.64983e-07	0.269384	0.465	0.223	0.0127628
MAP4	8.8072e-07	0.279928	0.698	0.388	0.012995
ATF6B	8.90152e-07	0.272189	0.558	0.287	0.0131342
EIF1	9.1178e-07	0.28225	0.709	0.395	0.0134533
SVIL	9.23255e-07	0.312317	0.663	0.366	0.0136226
OPA1	9.28635e-07	0.273186	0.453	0.215	0.013702
SRRM2	9.42819e-07	0.341186	0.988	0.853	0.0139113
RAB10	9.48718e-07	0.290785	0.791	0.459	0.0139983
PIGL	9.57761e-07	0.265657	0.337	0.139	0.0141318
ILRUN	9.60687e-07	0.264836	0.581	0.305	0.0141749
DUS3L	9.6124e-07	0.257274	0.5	0.24	0.0141831
OGA	9.84181e-07	0.263329	0.721	0.402	0.0145216
CERS4	9.87635e-07	0.263086	0.5	0.245	0.0145725
GTF3C5	9.94612e-07	0.250753	0.465	0.219	0.0146755
HUWE1	1.01125e-06	0.256431	0.465	0.223	0.0149209
TWIST2	1.01767e-06	-0.432045	0.035	0.273	0.0150158
TMEM237	1.06837e-06	0.268982	0.372	0.161	0.0157638
MKRN1	1.08438e-06	0.269384	0.5	0.248	0.016
DCTN1	1.08517e-06	0.252802	0.802	0.45	0.0160117
NDUFS3	1.09184e-06	0.261977	0.5	0.245	0.0161101
FCGRT	1.11275e-06	-0.492002	0.163	0.414	0.0164187
IST1	1.12357e-06	0.260566	0.512	0.252	0.0165782
MYH9	1.13538e-06	0.261424	0.977	0.736	0.0167526
LARP1	1.14847e-06	0.280209	0.535	0.273	0.0169456
GAB1	1.15706e-06	0.259314	0.442	0.207	0.0170724
DCAF8	1.16491e-06	0.26736	0.767	0.424	0.0171883
EIF3I	1.16924e-06	0.269384	0.523	0.263	0.0172521
YTHDF2	1.17272e-06	0.26196	0.419	0.192	0.0173034
NONO	1.17968e-06	0.284011	0.791	0.457	0.0174061
CNPPD1	1.18815e-06	0.266349	0.465	0.224	0.0175312
TERF2	1.19548e-06	0.254251	0.372	0.162	0.0176393
VPS4A	1.21905e-06	0.262442	0.57	0.292	0.017987
PLEKHG6	1.23249e-06	0.267486	0.453	0.216	0.0181854
RUFY1	1.23391e-06	0.256394	0.36	0.153	0.0182064
YY1AP1	1.24732e-06	0.269755	0.488	0.24	0.0184043
ZDHHC8	1.28202e-06	0.270465	0.512	0.254	0.0189161
AZIN1	1.29862e-06	0.255725	0.593	0.3	0.0191612
CNN3	1.32908e-06	-0.455636	0.07	0.313	0.0196106
PIM3	1.36173e-06	0.278366	0.616	0.338	0.0200923
KIF13A	1.37064e-06	0.257291	0.419	0.192	0.0202238
ILKAP	1.40216e-06	0.262634	0.407	0.185	0.0206889
THOC7	1.43417e-06	0.268302	0.512	0.257	0.0211612
HSPA1A	1.46022e-06	0.371014	0.779	0.519	0.0215456
HMG20B	1.46581e-06	0.264785	0.709	0.389	0.0216281
RCN3	1.48039e-06	-0.352134	0	0.218	0.0218431
DHPS	1.49609e-06	0.2711	0.57	0.293	0.0220748
SHTN1	1.56245e-06	0.290015	0.465	0.227	0.023054
ZNF280D	1.5641e-06	0.251297	0.384	0.169	0.0230783
ZNF410	1.61076e-06	0.251644	0.488	0.242	0.0237668
PUM1	1.61475e-06	0.273913	0.453	0.22	0.0238256
EVL	1.6623e-06	0.286062	0.605	0.324	0.0245272
ERO1A	1.69738e-06	-0.926868	0.081	0.319	0.0250448
VPS29	1.75576e-06	0.253641	0.477	0.236	0.0259062
HDAC2	1.7857e-06	0.259939	0.407	0.187	0.026348
HEBP2	1.80302e-06	0.290829	0.884	0.523	0.0266035
E2F4	1.82593e-06	0.257	0.512	0.254	0.0269415
HECA	1.82794e-06	0.256737	0.558	0.289	0.0269713
EIF3A	1.82922e-06	0.299546	0.93	0.653	0.0269901
EMP3	1.84028e-06	-0.376598	0.012	0.233	0.0271533
CD47	1.8782e-06	0.279368	0.477	0.24	0.0277128
ARGLU1	1.90036e-06	-0.531122	0.826	0.812	0.0280398
KDM4B	1.91284e-06	0.259939	0.407	0.187	0.0282239
S100A8	1.99632e-06	-0.600912	1	1	0.0294558
SUCLG1	2.04021e-06	0.253833	0.547	0.282	0.0301032
TCEAL4	2.04148e-06	0.263178	0.558	0.292	0.030122
CHKB	2.04457e-06	0.251652	0.593	0.313	0.0301676
TRA2A	2.05884e-06	0.321243	0.849	0.539	0.0303782
MSL2	2.06885e-06	0.260035	0.36	0.157	0.030526
SNRPC	2.07087e-06	0.279771	0.581	0.304	0.0305558
KRT1	2.07249e-06	1.32949	0.884	0.877	0.0305796
EPS8L1	2.08826e-06	-0.675542	0.012	0.231	0.0308122
YWHAB	2.10838e-06	0.263086	0.488	0.245	0.0311092
SQSTM1	2.11644e-06	-0.518127	0.767	0.835	0.031228
TKT	2.13507e-06	0.337736	0.535	0.287	0.0315029
ENOSF1	2.14175e-06	0.273186	0.442	0.213	0.0316015
STAT1	2.14389e-06	0.258412	0.453	0.218	0.0316331
CSDE1	2.16329e-06	0.261993	0.547	0.282	0.0319193
KDM6B	2.20643e-06	0.253833	0.547	0.28	0.0325558
RNF167	2.27816e-06	0.25277	0.465	0.227	0.0336142
EIF4E2	2.35548e-06	0.258762	0.407	0.189	0.0347552
GP1BB	2.37171e-06	0.355016	0.453	0.241	0.0349945
MANF	2.38366e-06	0.263047	0.547	0.286	0.0351709
PRDM1	2.43038e-06	-0.550771	0.035	0.26	0.0358603
PPP1R7	2.43507e-06	0.251476	0.43	0.204	0.0359295
ECE1	2.45178e-06	-0.392316	0.035	0.261	0.036176
COX6A1	2.48827e-06	0.321606	0.895	0.609	0.0367145
SMARCC1	2.53187e-06	0.263986	0.523	0.267	0.0373578
VPS39	2.53534e-06	0.252637	0.43	0.205	0.0374089
CCAR2	2.54183e-06	0.259397	0.535	0.275	0.0375047
ATXN7L3B	2.58388e-06	0.296025	0.558	0.293	0.0381252
SSBP1	2.6496e-06	0.269384	0.558	0.299	0.0390949
MEPCE	2.69731e-06	0.262791	0.419	0.197	0.0397988
CPXM1	2.72445e-06	-0.423382	0.023	0.244	0.0401993
CREG1	2.7479e-06	0.263482	0.535	0.276	0.0405453
OSBPL8	2.77511e-06	0.260989	0.442	0.213	0.0409467
TMED2	2.77627e-06	0.296506	0.791	0.485	0.0409639
CAVIN3	2.77836e-06	-0.376598	0.012	0.227	0.0409948
LUC7L2	2.77955e-06	0.255151	0.674	0.366	0.0410123
TAGLN	2.97287e-06	-0.428282	0.012	0.226	0.0438646
SENP6	2.98593e-06	0.289345	0.442	0.22	0.0440573
A2M	3.04241e-06	-0.468045	0	0.208	0.0448907
RPTN	3.07093e-06	-1.30377	0.174	0.418	0.0453116
AP2M1	3.08074e-06	0.297546	0.826	0.51	0.0454563
PER2	3.10316e-06	0.277464	0.523	0.272	0.0457871
ID3	3.12739e-06	0.346267	0.721	0.442	0.0461446
H3F3B	3.15568e-06	0.261738	0.977	0.849	0.0465621
ADAM33	3.18066e-06	-0.390484	0.023	0.242	0.0469307
FNDC3B	3.18857e-06	-0.432167	0.081	0.315	0.0470473
MZB1	3.28497e-06	-0.515149	0	0.207	0.0484698
SH3PXD2A	3.28588e-06	0.290575	0.709	0.414	0.0484832
NPEPL1	3.39497e-06	0.322724	0.547	0.3	0.0500927
PMP22	3.40154e-06	-0.431452	0.012	0.224	0.0501897
CCNL1	3.47494e-06	0.300327	0.674	0.413	0.0512727
PPP1R13L	3.51244e-06	0.251725	0.419	0.2	0.0518261
SLC66A2	3.64676e-06	0.275765	0.384	0.182	0.053808
UBE2B	3.66551e-06	0.28292	0.535	0.284	0.0540846
RIOK3	3.73803e-06	0.253739	0.512	0.262	0.0551546
SIGMAR1	3.89922e-06	0.268992	0.407	0.197	0.057533
ELAC2	3.90796e-06	0.256704	0.395	0.185	0.0576619
PHLDA1	3.9247e-06	-0.469842	0.023	0.239	0.057909
RREB1	3.97297e-06	0.261601	0.64	0.357	0.0586211
SF3B1	4.01521e-06	0.302243	0.779	0.497	0.0592445
ATP5MF	4.37284e-06	0.275495	0.64	0.367	0.0645213
CEBPG	4.4506e-06	0.286532	0.523	0.282	0.0656685
SREK1	4.5241e-06	0.272704	0.477	0.243	0.0667531
DNM1	4.59967e-06	-0.374182	0.035	0.252	0.0678681
TPM1	4.78249e-06	-0.406031	0.035	0.251	0.0705656
IFITM1	4.86888e-06	-0.426234	0.081	0.309	0.0718403
IL13RA1	4.87586e-06	0.263867	0.488	0.255	0.0719433
ANXA11	4.97116e-06	-0.477498	0.14	0.373	0.0733495
GGT5	5.09003e-06	-0.373306	0.012	0.218	0.0751034
VASN	5.44476e-06	-0.412329	0.012	0.217	0.0803374
IL36A	5.48189e-06	-0.774599	0.023	0.233	0.0808853
MT1X	5.51264e-06	0.8066	0.674	0.47	0.081339
FMO2	5.63031e-06	-0.570867	0.023	0.233	0.0830752
KIAA1217	5.72737e-06	0.283286	0.686	0.392	0.0845073
ESYT2	6.17668e-06	0.278763	0.581	0.323	0.0911369
IGHM	6.18484e-06	-0.709883	0.012	0.215	0.0912572
HLA-C	6.35094e-06	-0.606841	0.349	0.527	0.0937081
EMC10	6.42115e-06	0.282535	0.581	0.323	0.0947441
TMPRSS11E	6.47427e-06	-0.886499	0.035	0.246	0.0955279
TMUB2	6.59665e-06	0.250063	0.465	0.236	0.0973335
CLEC3B	6.66227e-06	-0.408618	0.023	0.231	0.0983017
PHLDB1	6.74077e-06	-0.390672	0.058	0.277	0.09946
FBXO42	6.7419e-06	0.268982	0.36	0.167	0.0994767
RBM23	6.86574e-06	0.272632	0.5	0.259	0.101304
SFRP4	6.90984e-06	-0.630284	0.012	0.213	0.101955
INTS3	7.07014e-06	0.259009	0.419	0.207	0.10432
RXRA	7.27403e-06	0.269384	0.756	0.47	0.107328
PRRC2A	7.37457e-06	0.254443	0.651	0.365	0.108812
H1F0	7.40173e-06	-0.576218	0.116	0.34	0.109212
SRSF1	7.41474e-06	0.277827	0.802	0.489	0.109404
XRCC5	7.42037e-06	0.29797	0.686	0.413	0.109488
RSRC2	7.43452e-06	0.281137	0.465	0.24	0.109696
PILRB	7.58605e-06	0.278834	0.674	0.389	0.111932
CTBP1	7.60169e-06	0.282376	0.814	0.501	0.112163
DENND5A	7.78626e-06	-0.312104	0	0.193	0.114886
PHRF1	7.93816e-06	0.2631	0.628	0.353	0.117128
TMPRSS11B	8.08374e-06	-1.05854	0.128	0.354	0.119276
VSIR	8.39096e-06	0.260367	0.453	0.232	0.123809
DRAP1	8.44533e-06	0.324037	0.791	0.511	0.124611
CRIP1	8.51655e-06	-0.599685	0.337	0.525	0.125662
C15orf48	8.67904e-06	-0.703759	0	0.192	0.128059
CTSZ	8.80237e-06	-0.388861	0.047	0.258	0.129879
PRSS27	9.13019e-06	-0.825594	0.093	0.308	0.134716
HSPG2	9.44636e-06	-0.52617	0.198	0.416	0.139381
UQCRC2	9.81483e-06	0.289948	0.442	0.233	0.144818
RXRB	9.84481e-06	0.26087	0.465	0.243	0.14526
HEG1	1.00997e-05	-0.364489	0.023	0.225	0.149022
CDK16	1.03923e-05	0.264763	0.407	0.202	0.153338
HNRNPU	1.04551e-05	0.251483	0.744	0.428	0.154265
ACIN1	1.04954e-05	0.278101	0.674	0.399	0.15486
CD46	1.05398e-05	0.253494	0.5	0.264	0.155514
ALOX12	1.08919e-05	-0.947688	0.058	0.267	0.160711
FGFR1	1.09257e-05	-0.336903	0.023	0.224	0.161208
CFH	1.09386e-05	-0.429891	0.07	0.283	0.161399
PRKG1	1.09884e-05	-0.339129	0.012	0.21	0.162134
CCL19	1.1174e-05	-0.530182	0	0.188	0.164872
EPN1	1.13046e-05	0.265292	0.709	0.428	0.166799
ARFGAP2	1.13903e-05	0.260989	0.43	0.218	0.168064
CACUL1	1.17645e-05	0.258156	0.419	0.213	0.173586
RTCB	1.32562e-05	0.255293	0.442	0.231	0.195595
VWF	1.32679e-05	-0.374292	0.023	0.221	0.195768
UQCR11	1.36514e-05	0.250018	0.593	0.332	0.201427
CCDC6	1.36988e-05	0.27091	0.651	0.391	0.202126
ACP1	1.44751e-05	0.263329	0.349	0.166	0.213579
HBEGF	1.45569e-05	0.274567	0.314	0.139	0.214786
GTPBP6	1.466e-05	0.251436	0.57	0.317	0.216308
C4orf3	1.53375e-05	-0.595515	0.372	0.524	0.226305
CLEC11A	1.56664e-05	-0.332067	0.012	0.201	0.231157
URB1	1.64586e-05	0.259388	0.349	0.162	0.242846
OGT	1.70544e-05	0.271071	0.709	0.429	0.251638
SERPING1	1.73501e-05	-0.375255	0.035	0.233	0.256001
KLK6	1.74169e-05	-0.585922	0	0.181	0.256987
HMGB1	1.74664e-05	0.31304	0.663	0.403	0.257716
APP	1.75097e-05	-0.57372	0.395	0.564	0.258356
ACTA2	1.76961e-05	-0.4739	0.023	0.216	0.261105
A4GALT	1.79528e-05	-0.293428	0	0.18	0.264893
PRSS23	1.82736e-05	-0.451951	0.105	0.318	0.269627
LCE3E	1.84632e-05	-0.897744	0.035	0.231	0.272424
COX6C	1.85399e-05	0.263287	0.698	0.424	0.273556
COL4A2	1.87299e-05	-0.318967	0.023	0.216	0.27636
KRT16	2.00076e-05	0.307128	1	1	0.295212
GLRX5	2.00855e-05	0.251871	0.535	0.295	0.296362
CCT2	2.00926e-05	0.261056	0.477	0.26	0.296466
RASD1	2.02437e-05	-0.342207	0.012	0.197	0.298696
PKD1	2.03108e-05	0.256532	0.616	0.36	0.299685
EXT1	2.07134e-05	0.291177	0.581	0.334	0.305627
PSMG3	2.18008e-05	0.252637	0.407	0.21	0.32167
EMILIN1	2.31125e-05	-0.313862	0.012	0.195	0.341025
ATP1B1	2.35368e-05	-0.612256	0.105	0.31	0.347285
DDX39B	2.46998e-05	0.271636	0.907	0.593	0.364446
AP3D1	2.48794e-05	0.260729	0.593	0.345	0.367096
HNRNPA3	2.53992e-05	0.251341	0.953	0.739	0.374765
CREB3L1	2.63036e-05	-0.317293	0.012	0.193	0.388109
DCHS1	2.63353e-05	-0.292253	0	0.174	0.388578
ANXA6	2.70407e-05	-0.336903	0.023	0.21	0.398985
LRRC15	2.70745e-05	-0.36011	0.023	0.21	0.399484
RASSF4	2.80536e-05	-0.325954	0	0.173	0.41393
ARHGEF40	2.93712e-05	-0.257745	0	0.172	0.433373
SAT1	2.97508e-05	0.557352	0.744	0.616	0.438973
LIMS2	2.99226e-05	-0.287542	0	0.172	0.441508
HOPX	3.00472e-05	-0.864415	0.721	0.844	0.443346
WIPF1	3.20062e-05	-0.366624	0.047	0.24	0.472251
CLEC14A	3.20872e-05	-0.314422	0	0.171	0.473446
ATP2A3	3.22008e-05	-0.305129	0	0.171	0.475123
CANX	3.26833e-05	0.255753	0.709	0.454	0.482243
DDIT4	3.28376e-05	-0.35947	0.105	0.314	0.484519
LYZ	3.35116e-05	-0.514851	0.023	0.206	0.494463
MYLK	3.38801e-05	-0.310423	0.012	0.189	0.499901
CCND2	3.39548e-05	-0.438284	0.093	0.294	0.501003
ATP1A1	3.44486e-05	0.264919	0.64	0.386	0.508289
BRD9	3.64118e-05	0.250798	0.372	0.189	0.537256
HLA-DPB1	3.67003e-05	-0.545963	0.081	0.281	0.541513
OGN	3.78071e-05	-0.370006	0.012	0.187	0.557844
MATR3	3.81783e-05	0.280517	0.57	0.339	0.563321
[truncated: 214 more rows]

## Sheet: A1 - region 7
	p_val	avg_log2FC	pct.1	pct.2	p_val_adj
FUT6	2.98151e-106	1.87198	0.836	0.051	4.39922e-102
CLCA4	1.24871e-96	2.19521	0.849	0.068	1.84248e-92
CRISP3	2.62736e-89	1.33178	0.63	0.028	3.87667e-85
PSCA	4.21002e-86	1.38978	0.589	0.024	6.21189e-82
PADI1	1.28266e-81	1.24684	0.534	0.019	1.89257e-77
ELF3	2.24082e-78	2.04271	0.863	0.101	3.30632e-74
CEACAM1	2.39084e-77	1.4511	0.685	0.049	3.52768e-73
TMPRSS11E	1.12503e-75	2.99489	0.973	0.175	1.65998e-71
CD177	4.54023e-74	1.21383	0.644	0.043	6.6991e-70
ADGRF1	1.26963e-73	0.729586	0.411	0.008	1.87333e-69
LYPD2	4.53241e-72	1.51605	0.767	0.075	6.68757e-68
CXCL17	5.08101e-71	0.991406	0.726	0.065	7.49703e-67
CLDN17	1.90319e-70	1.71255	0.74	0.073	2.80815e-66
AIF1L	2.03078e-70	1.38854	0.712	0.065	2.99641e-66
GPRC5A	2.12756e-63	1.59043	0.822	0.114	3.13921e-59
ALOX12	2.0356e-62	3.10926	0.932	0.202	3.00353e-58
MUC21	1.30265e-59	3.64689	1	0.298	1.92206e-55
ABLIM3	1.02795e-58	0.75578	0.507	0.032	1.51674e-54
CLDN7	1.16325e-57	1.9625	0.918	0.206	1.71637e-53
CDA	1.31879e-57	1.3797	0.863	0.144	1.94587e-53
C15orf48	3.22447e-57	2.48021	0.808	0.131	4.75771e-53
ERO1A	5.57031e-57	2.8791	0.973	0.252	8.21899e-53
SH3BGRL2	6.97766e-57	1.36324	0.781	0.12	1.02955e-52
EPS8L1	3.26692e-56	1.89483	0.89	0.165	4.82033e-52
TMPRSS11B	1.36316e-55	2.93853	0.986	0.29	2.01134e-51
ATP1B1	5.16826e-55	2.06327	0.945	0.247	7.62576e-51
KLK6	1.77772e-54	2.09136	0.781	0.122	2.62303e-50
SERPINB1	2.61223e-54	1.84007	0.945	0.212	3.85435e-50
SAMD9	8.25196e-54	1.00768	0.767	0.113	1.21758e-49
PRSS27	4.42322e-53	2.32469	0.959	0.243	6.52645e-49
SLC6A14	4.81943e-53	0.968351	0.671	0.078	7.11107e-49
CEACAM5	4.97332e-53	1.57869	0.767	0.119	7.33813e-49
UPP1	8.68254e-53	1.43085	0.767	0.129	1.28111e-48
ECM1	1.01908e-52	2.64953	0.959	0.265	1.50366e-48
DKK4	1.09141e-52	0.402999	0.288	0.005	1.61037e-48
ATG9B	1.72611e-52	1.5562	0.63	0.073	2.54687e-48
CYSRT1	2.21276e-52	1.69883	0.904	0.202	3.26493e-48
DHRS9	3.27682e-52	1.10848	0.507	0.04	4.83494e-48
FMO2	8.8306e-52	1.78509	0.849	0.17	1.30296e-47
TTC9	2.04105e-51	1.54708	0.904	0.187	3.01157e-47
ZNF365	1.61738e-50	0.401585	0.288	0.006	2.38645e-46
CLIC3	7.59051e-50	1.91888	1	0.324	1.11998e-45
TMPRSS2	9.73801e-49	0.657458	0.425	0.027	1.43684e-44
LCN2	1.79168e-48	2.05712	0.726	0.113	2.64362e-44
C1orf116	1.8132e-48	1.683	0.945	0.255	2.67537e-44
SHROOM3	2.33123e-48	0.922102	0.63	0.079	3.43972e-44
PDZK1IP1	2.4516e-48	1.41557	0.932	0.241	3.61734e-44
CEACAM7	7.24184e-48	0.537498	0.301	0.009	1.06853e-43
SLPI	9.88496e-47	2.27516	1	0.689	1.45853e-42
MAL	1.32366e-46	3.71756	1	0.614	1.95307e-42
GPX3	1.79266e-46	1.88874	0.986	0.342	2.64507e-42
NCCRP1	2.05562e-46	1.67924	0.986	0.309	3.03307e-42
MUC20	2.82104e-46	1.097	0.603	0.077	4.16244e-42
KRT4	3.67712e-46	3.83593	1	0.731	5.42559e-42
DUOXA2	3.69542e-46	0.454243	0.301	0.01	5.45259e-42
CRNN	3.94999e-46	3.60322	1	0.788	5.8282e-42
ANXA1	1.08099e-45	2.71	1	0.988	1.595e-41
SPRR3	1.24125e-45	3.44119	1	0.948	1.83147e-41
CSTB	5.05423e-45	2.82115	1	1	7.45751e-41
DUOX2	1.36923e-44	1.17513	0.781	0.161	2.0203e-40
IL1RN	1.76743e-44	2.38901	1	0.889	2.60785e-40
SERPINB2	2.44914e-44	0.974768	0.753	0.129	3.6137e-40
KLK12	3.32867e-44	1.98038	0.932	0.292	4.91146e-40
SCNN1A	5.77748e-44	1.14015	0.836	0.184	8.52467e-40
KRT78	6.39946e-44	3.34636	1	0.456	9.4424e-40
TM4SF1	7.18874e-44	1.62148	0.932	0.281	1.0607e-39
UPK3B	8.02348e-44	0.71883	0.438	0.035	1.18386e-39
PPL	1.56332e-43	2.21476	1	0.872	2.30668e-39
VPS37B	3.22815e-43	1.38753	0.767	0.165	4.76314e-39
MUC1	5.03972e-43	1.298	0.575	0.074	7.43611e-39
KRT13	5.45784e-43	2.10039	1	0.973	8.05305e-39
EMP1	5.91593e-43	3.17528	1	0.849	8.72896e-39
SPRR2A	7.83504e-43	2.3643	1	0.959	1.15606e-38
TGM1	1.32636e-42	1.9091	0.945	0.33	1.95704e-38
SERPINB3	3.3375e-42	1.02185	0.603	0.083	4.92449e-38
SBSN	5.91488e-42	1.88408	1	0.925	8.72741e-38
IL36A	1.00389e-41	2.19782	0.781	0.175	1.48124e-37
S100A14	1.3514e-41	1.65017	1	0.964	1.994e-37
LRRC20	1.82691e-41	1.22122	0.616	0.094	2.69561e-37
CSTA	1.83299e-41	1.93523	1	0.9	2.70458e-37
S100A8	2.70703e-41	1.4523	1	1	3.99422e-37
SPINK7	3.98501e-41	2.72852	1	0.618	5.87988e-37
TGM3	4.25178e-41	2.31063	1	0.871	6.2735e-37
DTX2	6.19643e-41	1.26235	0.74	0.155	9.14283e-37
RAB11FIP1	1.80812e-40	0.97535	0.726	0.141	2.66788e-36
S100A12	4.7701e-40	0.618116	0.493	0.053	7.03828e-36
ATP6V0A4	6.5165e-40	0.312296	0.219	0.004	9.61509e-36
S100A9	7.38833e-40	1.39424	1	1	1.09015e-35
SCEL	1.87042e-39	2.28183	0.973	0.479	2.7598e-35
SFTA2	3.26062e-39	0.297771	0.205	0.003	4.81104e-35
CNFN	4.66496e-39	2.3532	1	0.827	6.88315e-35
CRYAB	1.0089e-38	1.52591	0.986	0.474	1.48863e-34
PPP1R3C	1.43277e-38	1.56722	0.849	0.249	2.11404e-34
SPRR2D	2.268e-38	2.63471	1	0.81	3.34643e-34
HIST1H2AC	5.72911e-38	0.818592	0.658	0.114	8.4533e-34
SPINK5	7.69045e-38	1.95993	1	0.787	1.13473e-33
MYEOV	7.93142e-38	0.326648	0.219	0.005	1.17028e-33
TPRG1	1.03189e-37	0.947723	0.63	0.105	1.52255e-33
GLTP	1.12769e-37	1.6225	0.986	0.648	1.6639e-33
SLC12A8	1.39349e-37	0.655843	0.411	0.037	2.05609e-33
HOPX	5.72526e-37	1.74377	1	0.823	8.44762e-33
PAX9	1.04174e-36	0.892487	0.562	0.087	1.53709e-32
TACSTD2	1.14618e-36	1.55078	1	0.872	1.6912e-32
RHOD	1.22488e-36	1.27103	0.918	0.349	1.80731e-32
MXD1	1.36113e-36	1.74994	0.863	0.266	2.00835e-32
VSIG10L	2.74218e-36	1.12598	0.74	0.165	4.04609e-32
GRHL1	3.06191e-36	1.29584	0.904	0.311	4.51784e-32
FAM83D	4.38664e-36	1.21116	0.507	0.07	6.47249e-32
SLC5A1	6.79744e-36	0.923817	0.575	0.09	1.00296e-31
MAB21L4	1.06418e-35	1.17353	0.726	0.178	1.5702e-31
SORT1	1.50655e-35	0.909914	0.849	0.216	2.22292e-31
SPRR1B	2.047e-35	1.85138	0.959	0.594	3.02035e-31
HS3ST1	2.29293e-35	0.472792	0.425	0.043	3.38322e-31
APOBEC3A	2.32916e-35	0.725677	0.37	0.032	3.43668e-31
SDCBP2	2.43654e-35	1.1605	0.795	0.205	3.59512e-31
KRT6B	5.71964e-35	1.48009	1	0.992	8.43933e-31
S100A16	1.35533e-34	1.33947	1	0.883	1.99978e-30
MALL	3.94576e-34	1.29159	0.849	0.29	5.82196e-30
H1F0	9.66227e-34	1.4044	0.863	0.284	1.42567e-29
MDFIC	9.68545e-34	1.0006	0.726	0.183	1.42909e-29
PITX1	1.0919e-33	1.13429	1	0.736	1.61109e-29
PHLDA1	1.22105e-33	1.55443	0.726	0.185	1.80166e-29
CGNL1	1.32666e-33	0.71887	0.575	0.096	1.95749e-29
LMO7	1.33589e-33	1.96461	0.877	0.317	1.97111e-29
FOS	1.4076e-33	-2.10146	0.616	0.963	2.07691e-29
FAM3D	1.48581e-33	0.886212	0.589	0.103	2.19231e-29
GJB2	1.92568e-33	1.38103	1	0.871	2.84135e-29
KLK13	3.34375e-33	1.76328	0.973	0.598	4.9337e-29
BEX4	6.64573e-33	0.781361	0.658	0.137	9.80577e-29
RHCG	8.79756e-33	2.70157	0.973	0.736	1.29808e-28
PIM1	1.13355e-32	1.47053	0.918	0.348	1.67255e-28
PRSS3	1.23382e-32	0.825741	0.603	0.113	1.8205e-28
DDX5	1.3589e-32	-1.59839	0.466	0.961	2.00506e-28
LPIN1	1.62744e-32	0.962604	0.521	0.084	2.40129e-28
SULT2B1	2.73165e-32	1.34585	0.89	0.329	4.03055e-28
GRPEL2	3.04797e-32	0.928226	0.479	0.07	4.49728e-28
CRCT1	5.7393e-32	3.19317	1	0.704	8.46834e-28
KRT1	6.18567e-32	-2.93058	0.274	0.921	9.12696e-28
FUT3	8.24472e-32	0.615737	0.507	0.075	1.21651e-27
NIBAN2	1.6485e-31	1.52782	0.973	0.777	2.43237e-27
A2ML1	3.34031e-31	1.54235	0.973	0.61	4.92863e-27
SLURP2	4.44915e-31	1.55797	0.877	0.343	6.56472e-27
TP53INP2	5.33811e-31	1.32329	0.822	0.246	7.87637e-27
SERPINB11	7.57733e-31	1.27985	0.808	0.236	1.11803e-26
RAB11A	9.19784e-31	1.01902	0.959	0.442	1.35714e-26
C4orf3	1.28228e-30	1.2479	0.973	0.479	1.89201e-26
IVL	1.30063e-30	1.30588	1	0.829	1.91908e-26
DSG3	1.3021e-30	1.31697	0.986	0.876	1.92125e-26
USP6NL	2.18523e-30	0.78228	0.589	0.114	3.22431e-26
FBXO34	2.32891e-30	0.880899	0.534	0.095	3.4363e-26
CLDN4	2.33176e-30	1.2556	0.836	0.271	3.44052e-26
PPIF	2.37442e-30	1.31851	0.945	0.317	3.50346e-26
HNRNPDL	4.08935e-30	-1.49276	0.233	0.905	6.03383e-26
UBC	4.63544e-30	0.986537	1	1	6.83959e-26
KRT10	8.03488e-30	-2.74056	0.521	0.939	1.18555e-25
TMEM45B	1.91624e-29	0.616867	0.685	0.146	2.8274e-25
UPK1A	1.96921e-29	0.424105	0.356	0.036	2.90557e-25
TRIM16	2.40848e-29	0.735782	0.699	0.169	3.55371e-25
KIFC3	2.69891e-29	1.06088	0.616	0.138	3.98224e-25
B3GNT3	3.41214e-29	0.284488	0.137	0.001	5.03462e-25
IGFBP5	3.8493e-29	-2.34455	0.123	0.821	5.67964e-25
CD68	5.53796e-29	0.867172	0.562	0.114	8.17126e-25
C18orf25	6.14856e-29	1.2005	0.644	0.156	9.0722e-25
ST3GAL4	7.08083e-29	0.705517	0.534	0.099	1.04478e-24
PTMS	7.99264e-29	-1.59333	0.37	0.901	1.17931e-24
FAM83A	8.62969e-29	1.27299	0.63	0.152	1.27331e-24
F3	1.60654e-28	1.62218	0.877	0.35	2.37045e-24
MBOAT2	2.37755e-28	0.873675	0.712	0.18	3.50808e-24
CHMP4C	2.47415e-28	0.870531	0.685	0.169	3.6506e-24
TMEM40	3.23182e-28	0.943945	0.877	0.301	4.76855e-24
B3GNT8	3.35935e-28	0.544193	0.452	0.068	4.95672e-24
SFPQ	4.64211e-28	-1.37332	0.164	0.873	6.84943e-24
CTSV	5.46839e-28	0.52123	0.342	0.036	8.06861e-24
PCSK5	1.3087e-27	0.730565	0.562	0.113	1.93098e-23
PLEC	1.52929e-27	-1.31818	0.288	0.878	2.25646e-23
GPAT3	2.20089e-27	0.491783	0.342	0.037	3.24742e-23
PPP1CB	2.54019e-27	1.07074	0.959	0.523	3.74804e-23
KLK10	2.55922e-27	1.1011	0.973	0.656	3.77612e-23
CRYBG1	4.31342e-27	1.27986	0.836	0.296	6.36446e-23
RMND5A	4.6473e-27	1.02177	0.849	0.315	6.85709e-23
IL36RN	6.5013e-27	0.654336	0.767	0.203	9.59267e-23
PRSS22	6.66347e-27	0.772777	0.562	0.113	9.83195e-23
NPEPPS	7.22043e-27	1.0146	0.836	0.328	1.06537e-22
SRRM2	1.12744e-26	-1.27996	0.288	0.905	1.66353e-22
SERPINB13	1.55796e-26	1.1965	1	0.63	2.29877e-22
IL18	1.98347e-26	0.402377	0.329	0.035	2.92661e-22
TMPRSS11D	2.13616e-26	1.29022	0.959	0.792	3.1519e-22
HSPB8	2.18301e-26	1.03935	0.74	0.227	3.22104e-22
SPNS2	2.25454e-26	1.54307	0.712	0.215	3.32657e-22
CAVIN1	2.71515e-26	-1.47286	0.233	0.846	4.00621e-22
SCD	3.73143e-26	0.94329	0.781	0.262	5.50573e-22
ME1	3.80506e-26	0.782098	0.671	0.179	5.61436e-22
DAPP1	4.08977e-26	0.53981	0.507	0.093	6.03446e-22
FTL	4.31503e-26	-1.39589	0.151	0.818	6.36682e-22
KRT15	4.34451e-26	-2.15547	0.507	0.917	6.41032e-22
ARGLU1	5.14347e-26	-1.39139	0.274	0.852	7.58919e-22
PADI3	6.81286e-26	0.259692	0.178	0.007	1.00524e-21
BICDL2	7.1101e-26	0.794124	0.712	0.198	1.0491e-21
CD24	7.13247e-26	1.20992	0.973	0.542	1.0524e-21
CARHSP1	7.13557e-26	0.722791	0.753	0.221	1.05285e-21
RNF222	9.78814e-26	0.68362	0.493	0.088	1.44424e-21
SPRR2F	1.4562e-25	1.14243	0.493	0.092	2.14862e-21
CST6	1.61264e-25	0.516587	0.438	0.069	2.37945e-21
ANGPTL4	1.65124e-25	0.52531	0.397	0.056	2.43641e-21
CXCL14	1.75486e-25	-1.82456	0.411	0.907	2.58929e-21
HSPB1	2.08214e-25	0.71389	1	0.999	3.07219e-21
SORBS1	2.2322e-25	0.424596	0.356	0.044	3.29361e-21
PLBD1	2.2869e-25	0.909479	0.685	0.184	3.37431e-21
PDZRN3	2.45131e-25	0.443953	0.356	0.045	3.6169e-21
SNRNP70	2.784e-25	-1.32216	0.178	0.827	4.10779e-21
DCN	3.68305e-25	-2.36333	0.205	0.8	5.43435e-21
FBXO32	4.00315e-25	0.499098	0.425	0.066	5.90665e-21
IGFL1	4.36672e-25	0.472766	0.274	0.025	6.4431e-21
COL1A1	4.40596e-25	-3.61004	0.726	0.935	6.501e-21
LRP10	6.64121e-25	0.943186	0.986	0.58	9.7991e-21
SPARC	7.20497e-25	-3.47589	0.233	0.796	1.06309e-20
HNRNPA2B1	7.72248e-25	-1.27697	0.342	0.884	1.13945e-20
WNK1	7.9644e-25	-1.24551	0.151	0.818	1.17515e-20
ANKRD37	8.33599e-25	0.627514	0.452	0.079	1.22998e-20
RAB10	1.27129e-24	0.890129	0.932	0.453	1.87578e-20
PORCN	1.2743e-24	0.558274	0.356	0.047	1.88022e-20
MGLL	1.4336e-24	0.924309	0.822	0.311	2.11527e-20
COL3A1	1.49094e-24	-3.382	0.795	0.938	2.19989e-20
NT5C2	2.23367e-24	0.872525	0.74	0.24	3.29578e-20
FRMD4B	2.68045e-24	0.799768	0.644	0.178	3.95501e-20
VIM	3.20858e-24	-2.29975	0.205	0.781	4.73426e-20
RND1	3.50966e-24	0.423605	0.288	0.03	5.1785e-20
DNAJB1	4.59099e-24	0.914883	0.959	0.594	6.77401e-20
JUN	6.483e-24	-1.50054	0.096	0.748	9.56566e-20
DYNAP	7.54828e-24	0.833216	0.507	0.105	1.11375e-19
EPHA2	8.68633e-24	1.16443	0.849	0.352	1.28167e-19
ZNRF1	1.12875e-23	0.684625	0.699	0.212	1.66547e-19
LMNA	1.29619e-23	-1.15856	0.644	0.949	1.91252e-19
FNDC4	1.33612e-23	0.456403	0.342	0.045	1.97144e-19
HLA-A	1.68031e-23	-1.25289	0.452	0.909	2.47929e-19
NIPAL1	1.68695e-23	0.498677	0.466	0.087	2.4891e-19
TRIP10	1.69016e-23	0.975368	0.808	0.324	2.49384e-19
HEPHL1	1.86954e-23	0.839977	0.671	0.184	2.7585e-19
COL6A1	2.7256e-23	-1.89878	0.082	0.715	4.02163e-19
CRYBG2	2.93414e-23	0.765339	0.63	0.18	4.32933e-19
BST2	3.00108e-23	0.848277	0.877	0.321	4.4281e-19
ARNTL2	3.37769e-23	0.37287	0.342	0.045	4.98378e-19
DUSP4	3.82462e-23	0.616595	0.315	0.039	5.64323e-19
TGFA	3.92027e-23	0.464664	0.342	0.046	5.78436e-19
EEF2	4.35103e-23	-1.11989	0.603	0.989	6.41995e-19
TMOD3	4.4243e-23	1.02553	0.973	0.475	6.52806e-19
ZNF185	4.53406e-23	1.11748	0.904	0.524	6.69e-19
FOSB	5.39727e-23	-1.68396	0.37	0.849	7.96367e-19
FAM171A2	7.09757e-23	0.365025	0.329	0.042	1.04725e-18
KRT80	8.4829e-23	1.14072	0.918	0.457	1.25165e-18
AFDN	1.03897e-22	0.875599	0.767	0.286	1.533e-18
GLUL	1.10843e-22	2.45368	0.918	0.743	1.63549e-18
ARHGAP40	1.15417e-22	0.331121	0.288	0.032	1.70298e-18
RAPGEF3	1.78098e-22	0.52883	0.397	0.067	2.62783e-18
CIRBP	1.82047e-22	-1.1099	0.342	0.862	2.6861e-18
RNF141	1.87349e-22	0.746516	0.781	0.288	2.76434e-18
UBL3	2.36597e-22	0.70527	0.63	0.18	3.49099e-18
VSIG10	2.62297e-22	0.43818	0.315	0.04	3.8702e-18
MTPN	2.74164e-22	1.15178	0.822	0.377	4.04529e-18
TMPRSS4	2.85895e-22	0.532592	0.452	0.086	4.21838e-18
ZFP36L1	3.86843e-22	-1.11799	0.658	0.975	5.70786e-18
HMOX1	4.19087e-22	0.726319	0.479	0.099	6.18362e-18
CNN3	4.22919e-22	0.754339	0.753	0.261	6.24018e-18
HEBP2	4.35442e-22	0.775812	0.973	0.521	6.42495e-18
EEF1G	4.36454e-22	-1.10077	0.534	0.956	6.43988e-18
DDX17	4.86369e-22	-1.14021	0.397	0.878	7.17638e-18
RNF208	5.6853e-22	0.504916	0.466	0.094	8.38866e-18
SPINT1	6.27212e-22	0.921859	0.918	0.433	9.25452e-18
NUAK2	8.74749e-22	0.759304	0.63	0.176	1.29069e-17
RASAL1	9.02152e-22	0.579439	0.671	0.179	1.33113e-17
PRRC2C	1.02337e-21	-1.11425	0.192	0.771	1.50998e-17
COL1A2	1.07805e-21	-3.28427	0.973	0.983	1.59067e-17
PGLYRP3	1.35966e-21	0.746238	0.74	0.25	2.00618e-17
ASPG	1.39117e-21	0.418394	0.384	0.063	2.05266e-17
TOM1	1.4082e-21	0.756248	0.726	0.253	2.07781e-17
GJB6	1.59647e-21	0.95978	0.836	0.342	2.35558e-17
HSBP1	1.77373e-21	0.710941	0.849	0.341	2.61714e-17
RBMS2	1.9279e-21	0.552706	0.466	0.097	2.84462e-17
TJP1	2.27917e-21	0.956137	0.795	0.326	3.36292e-17
RNF225	2.46013e-21	0.577221	0.685	0.183	3.62992e-17
NAPRT	3.0083e-21	0.732601	0.699	0.233	4.43875e-17
PCDH1	3.2723e-21	0.742674	0.74	0.237	4.82828e-17
MSMO1	4.30796e-21	0.470227	0.397	0.069	6.35639e-17
IGFBP4	5.10923e-21	-1.81122	0.068	0.671	7.53866e-17
SNCG	5.34723e-21	0.490011	0.384	0.066	7.88984e-17
RHOB	6.57392e-21	-1.28457	0.068	0.672	9.69982e-17
STN1	7.08285e-21	0.476789	0.479	0.101	1.04507e-16
FLNA	7.09289e-21	-1.19791	0.247	0.789	1.04656e-16
SLURP1	7.26847e-21	0.89169	0.781	0.288	1.07246e-16
COL6A2	1.12059e-20	-1.73825	0.11	0.695	1.65343e-16
HNRNPUL1	1.17896e-20	-1.03471	0.356	0.824	1.73955e-16
NCL	1.22842e-20	-1.11365	0.274	0.82	1.81254e-16
EBP	2.37503e-20	0.498537	0.562	0.139	3.50435e-16
RNASE7	2.39531e-20	0.611166	0.274	0.033	3.53428e-16
ANXA11	2.40762e-20	0.996842	0.781	0.324	3.55244e-16
PLS3	2.53937e-20	0.754155	0.863	0.394	3.74684e-16
BLVRB	2.68163e-20	0.555853	0.466	0.103	3.95674e-16
FAM43A	4.514e-20	1.00216	0.849	0.367	6.6604e-16
LENG8	6.41133e-20	-1.05888	0.164	0.741	9.45992e-16
LOR	9.44119e-20	-2.0039	0.219	0.796	1.39305e-15
MAPK3	9.62309e-20	0.686754	0.822	0.33	1.41989e-15
IFITM3	1.55803e-19	-1.25159	0.315	0.819	2.29888e-15
RACK1	1.77195e-19	-1.02987	0.274	0.791	2.61451e-15
SRSF11	1.93018e-19	-1.07914	0.178	0.745	2.84798e-15
EEF1A2	2.16461e-19	0.336642	0.288	0.038	3.19389e-15
WFDC12	2.27875e-19	1.02586	0.548	0.147	3.36229e-15
KRT16	2.8376e-19	-1.12005	1	1	4.18687e-15
HNRNPH1	3.00249e-19	-1.04131	0.274	0.829	4.43017e-15
IER3	3.33097e-19	0.877558	0.795	0.317	4.91484e-15
FUT2	3.36664e-19	0.471753	0.507	0.122	4.96748e-15
SULT1B1	3.74596e-19	0.251247	0.178	0.013	5.52717e-15
S100A10	3.97973e-19	0.825214	1	0.879	5.8721e-15
PITX2	6.8478e-19	0.837257	0.863	0.433	1.01039e-14
CPEB4	7.12822e-19	0.587404	0.603	0.178	1.05177e-14
TUBB6	7.46271e-19	0.724351	0.808	0.335	1.10112e-14
PTGDS	7.54957e-19	-1.89157	0.068	0.629	1.11394e-14
ATP6V1C2	1.16525e-18	0.573307	0.548	0.142	1.71933e-14
ABLIM1	1.27077e-18	0.913106	0.945	0.633	1.87502e-14
EGR1	1.2812e-18	-1.21038	0.151	0.719	1.89042e-14
ZDHHC13	1.66913e-18	0.723263	0.63	0.194	2.4628e-14
ADIPOR2	2.26721e-18	0.504154	0.466	0.108	3.34527e-14
EYA2	2.3822e-18	0.396641	0.411	0.084	3.51494e-14
PLEKHM1	2.94673e-18	0.504905	0.507	0.128	4.3479e-14
MAF	4.22192e-18	-0.994642	0.562	0.925	6.22944e-14
UBE2G1	4.29692e-18	0.591835	0.685	0.23	6.34011e-14
RTKN2	4.79356e-18	0.345979	0.342	0.059	7.0729e-14
ZNF426	5.54348e-18	0.587669	0.438	0.103	8.1794e-14
FLVCR2	7.28253e-18	0.505631	0.493	0.122	1.07454e-13
COL17A1	7.79769e-18	-1.52542	0.301	0.802	1.15055e-13
CLDN1	8.34215e-18	0.657785	0.836	0.346	1.23088e-13
RALA	9.82578e-18	0.602259	0.74	0.279	1.44979e-13
MCL1	1.04871e-17	-0.957847	0.534	0.906	1.54738e-13
TMPRSS11A	1.26963e-17	0.701259	0.712	0.279	1.87333e-13
LNX1	1.73541e-17	0.439887	0.301	0.049	2.56059e-13
HEG1	1.94914e-17	0.761356	0.575	0.182	2.87596e-13
ALDH1A3	2.06321e-17	0.618036	0.288	0.045	3.04427e-13
EPPK1	2.54618e-17	-1.18181	0.329	0.804	3.75689e-13
EREG	3.06232e-17	0.608705	0.397	0.085	4.51846e-13
SEPTIN2	3.46136e-17	-0.964819	0.219	0.727	5.10723e-13
MYL12A	4.39813e-17	0.676637	0.685	0.258	6.48945e-13
PCOLCE	4.69574e-17	-1.55527	0.068	0.601	6.92857e-13
NABP1	4.84866e-17	1.00985	0.603	0.217	7.1542e-13
RIN3	6.2446e-17	0.607919	0.493	0.136	9.21391e-13
MAP1LC3A	6.56993e-17	0.556089	0.726	0.255	9.69393e-13
HNRNPA3	6.96995e-17	-0.951386	0.329	0.786	1.02842e-12
CDV3	8.66531e-17	-0.94781	0.178	0.686	1.27857e-12
ENDOU	9.02517e-17	0.669453	0.658	0.219	1.33166e-12
EPS8L2	9.86841e-17	0.991373	0.918	0.66	1.45608e-12
YOD1	1.01287e-16	0.67482	0.534	0.156	1.49448e-12
CCNL2	1.04701e-16	-0.91385	0.356	0.789	1.54486e-12
GNE	1.08458e-16	0.317447	0.274	0.041	1.6003e-12
QSOX1	1.24978e-16	1.09492	0.836	0.38	1.84405e-12
RANBP9	1.26062e-16	0.677952	0.644	0.23	1.86004e-12
SDR16C5	1.77049e-16	0.577303	0.753	0.286	2.61235e-12
LYPD3	1.77505e-16	0.754503	1	0.95	2.61908e-12
TNFAIP8L3	1.82032e-16	0.351052	0.37	0.075	2.68588e-12
C1R	1.90174e-16	-1.57278	0.096	0.608	2.80601e-12
PPP1R3B	1.985e-16	0.347407	0.301	0.051	2.92887e-12
ETHE1	2.10138e-16	0.538389	0.658	0.229	3.10058e-12
KLK5	2.17055e-16	0.692379	0.452	0.116	3.20265e-12
KRT14	2.469e-16	-0.894071	1	1	3.643e-12
FCHO2	2.56701e-16	0.607337	0.644	0.232	3.78762e-12
TMEM259	2.66899e-16	-0.942693	0.219	0.688	3.9381e-12
MYO5B	2.69679e-16	0.491631	0.575	0.173	3.97912e-12
TSC22D2	2.95421e-16	0.757395	0.562	0.186	4.35894e-12
HMGA1	3.65636e-16	0.456403	0.575	0.175	5.39496e-12
MYC	3.95452e-16	-1.14534	0.397	0.862	5.8349e-12
ID1	4.01435e-16	-0.961624	0.342	0.806	5.92317e-12
NOP53	4.44113e-16	-0.951086	0.274	0.747	6.55289e-12
FBLN1	4.5572e-16	-1.36269	0.068	0.578	6.72415e-12
IGHG1	4.69818e-16	-2.52823	0.247	0.683	6.93216e-12
CXCL12	5.3029e-16	-1.63092	0.055	0.574	7.82442e-12
HIST1H1E	5.51706e-16	-0.975492	0.274	0.746	8.14043e-12
SGK1	5.62124e-16	-0.954877	0.274	0.766	8.29414e-12
CD44	6.91701e-16	-0.962272	0.575	0.952	1.02061e-11
TSC22D3	7.12731e-16	-1.11315	0.041	0.566	1.05163e-11
KLK7	8.08251e-16	0.728429	0.822	0.414	1.19257e-11
ARG2	9.74762e-16	0.401854	0.37	0.08	1.43826e-11
CAP1	1.07417e-15	0.609252	0.753	0.312	1.58494e-11
TMEM184A	1.74521e-15	0.634256	0.589	0.199	2.57506e-11
SLC37A1	1.84246e-15	0.294493	0.301	0.053	2.71856e-11
DMKN	2.14806e-15	0.710297	0.863	0.449	3.16946e-11
SCNN1B	2.1868e-15	0.555551	0.507	0.155	3.22662e-11
NAA20	2.58101e-15	0.616042	0.781	0.359	3.80828e-11
CD99	2.78507e-15	-1.00313	0.288	0.717	4.10937e-11
DENND10	2.88985e-15	0.864444	0.493	0.154	4.26398e-11
ANXA2	2.94172e-15	0.734667	0.945	0.724	4.34051e-11
PTGES3	2.96906e-15	-0.882382	0.288	0.745	4.38085e-11
ATP6V1D	3.63197e-15	0.486739	0.63	0.222	5.35898e-11
ANXA3	3.83416e-15	0.30218	0.26	0.041	5.6573e-11
CRIP1	4.23066e-15	-1.07469	0.041	0.544	6.24233e-11
SLK	4.51713e-15	0.750746	0.836	0.462	6.66502e-11
PTK6	5.79007e-15	0.484282	0.658	0.237	8.54324e-11
KRT7	6.12888e-15	0.391728	0.151	0.013	9.04316e-11
PI3	6.93689e-15	0.950074	0.603	0.225	1.02354e-10
IGHG2	6.9523e-15	-2.87788	0.507	0.787	1.02581e-10
PSAP	7.19576e-15	-0.795564	0.753	0.959	1.06173e-10
LSP1	7.42288e-15	-1.22387	0.123	0.599	1.09525e-10
TMBIM1	8.49654e-15	0.820702	0.767	0.42	1.25366e-10
MACF1	9.14994e-15	-0.816043	0.247	0.706	1.35007e-10
ZFP36L2	1.00468e-14	-1.08909	0.164	0.626	1.48241e-10
GAS1	1.03059e-14	-1.13948	0.11	0.591	1.52063e-10
GDPD3	1.06492e-14	0.434184	0.493	0.141	1.57129e-10
PMAIP1	1.08405e-14	0.658625	0.342	0.078	1.59952e-10
SDC1	1.18898e-14	0.655752	0.986	0.932	1.75433e-10
LTBP4	1.30962e-14	-0.969421	0.082	0.567	1.93234e-10
TSPAN6	1.38216e-14	0.326013	0.315	0.062	2.03938e-10
NUCKS1	1.77823e-14	-0.929472	0.096	0.573	2.62378e-10
ILF3	1.80212e-14	-0.924419	0.219	0.653	2.65902e-10
H2AFJ	2.38072e-14	0.534965	0.808	0.351	3.51275e-10
EIF4B	2.69039e-14	-0.892202	0.274	0.701	3.96967e-10
AEBP1	3.56196e-14	-1.37395	0.068	0.551	5.25567e-10
RAB5IF	4.20626e-14	0.618225	0.781	0.384	6.20633e-10
DIAPH1	4.49361e-14	0.601042	0.699	0.312	6.63033e-10
RNF11	4.73343e-14	0.572809	0.767	0.361	6.98417e-10
IGLC1	5.21343e-14	-2.6118	0.315	0.683	7.69241e-10
RHBDL2	5.81851e-14	0.422095	0.479	0.142	8.58521e-10
QKI	6.22701e-14	-0.879641	0.205	0.648	9.18795e-10
EGLN3	7.07895e-14	0.496447	0.425	0.118	1.0445e-09
PABPC1	7.63478e-14	0.734353	1	0.982	1.12651e-09
PRRC2B	7.8025e-14	-0.863438	0.192	0.644	1.15126e-09
TCP11L2	8.17762e-14	0.738166	0.548	0.208	1.20661e-09
FBN1	8.21734e-14	-1.2272	0.068	0.529	1.21247e-09
LDB1	8.34012e-14	-0.868443	0.055	0.528	1.23058e-09
AVPI1	8.56855e-14	0.590154	0.562	0.194	1.26429e-09
KLK8	9.73402e-14	0.584351	0.589	0.219	1.43625e-09
MAL2	1.01991e-13	0.755963	0.863	0.485	1.50488e-09
ADIRF	1.05099e-13	1.42538	0.699	0.399	1.55074e-09
NFE2L2	1.08898e-13	-0.948873	0.233	0.693	1.60679e-09
MARCKS	1.0898e-13	-0.901568	0.63	0.888	1.608e-09
GJA1	1.31394e-13	-0.972317	0.466	0.847	1.93872e-09
RDH12	1.41233e-13	0.515296	0.479	0.151	2.08389e-09
LUM	1.41734e-13	-1.40259	0.096	0.551	2.09129e-09
CXCR2	1.7284e-13	0.263575	0.233	0.037	2.55025e-09
S100A11	1.94769e-13	0.895752	0.973	0.857	2.87382e-09
GMDS	2.5876e-13	0.400635	0.37	0.093	3.81801e-09
CERS3	2.76596e-13	0.506357	0.753	0.312	4.08118e-09
VPS4B	2.85477e-13	0.565802	0.671	0.303	4.21222e-09
DHX32	2.94037e-13	0.339269	0.411	0.109	4.33851e-09
AMOTL2	3.0391e-13	0.746516	0.63	0.271	4.48419e-09
MYL12B	3.04078e-13	0.554149	0.767	0.367	4.48667e-09
ARHGEF18	3.15599e-13	0.469462	0.466	0.145	4.65667e-09
PRRX1	3.8934e-13	-0.967956	0.041	0.494	5.74472e-09
IGFBP7	3.9189e-13	-1.25893	0.096	0.532	5.78233e-09
ISG15	4.19346e-13	1.07687	0.562	0.244	6.18745e-09
KRT5	4.84413e-13	-0.996153	1	0.995	7.14751e-09
CHP1	5.09806e-13	0.481798	0.671	0.268	7.52218e-09
GNA15	5.7376e-13	0.46022	0.534	0.186	8.46583e-09
COL16A1	6.43477e-13	-0.988342	0.055	0.5	9.49451e-09
RTN4	6.66685e-13	-0.75619	0.493	0.838	9.83693e-09
IFITM2	6.79399e-13	-1.01053	0.137	0.562	1.00245e-08
KAT2B	7.28371e-13	0.423761	0.479	0.153	1.07471e-08
EVPL	8.04302e-13	0.693189	0.986	0.837	1.18675e-08
NDRG2	8.47631e-13	0.710941	0.699	0.336	1.25068e-08
ATN1	1.01513e-12	-0.871033	0.137	0.576	1.49782e-08
LGMN	1.03212e-12	0.48189	0.644	0.258	1.5229e-08
SOD1	1.10093e-12	-0.855156	0.082	0.517	1.62443e-08
INF2	1.10518e-12	-0.795976	0.055	0.502	1.6307e-08
ID3	1.10622e-12	-0.869465	0.055	0.494	1.63223e-08
USH1G	1.2519e-12	0.321873	0.288	0.061	1.84717e-08
ARHGAP5	1.26841e-12	0.336735	0.384	0.1	1.87153e-08
PITPNA	1.34563e-12	-0.824822	0.315	0.706	1.98548e-08
CAMK2N1	1.40452e-12	0.25587	0.205	0.032	2.07238e-08
SRSF2	1.41782e-12	-0.787523	0.315	0.708	2.09199e-08
GFOD2	1.43322e-12	0.512037	0.493	0.169	2.11472e-08
SLC13A4	1.53027e-12	0.252193	0.178	0.024	2.25791e-08
XBP1	1.60402e-12	-1.21706	0.288	0.663	2.36673e-08
SRSF1	1.79677e-12	-0.801385	0.11	0.543	2.65113e-08
FN1	1.85079e-12	-1.05671	0.068	0.499	2.73084e-08
RND3	1.86861e-12	0.535309	0.548	0.206	2.75714e-08
GRHL3	1.87047e-12	0.545321	0.863	0.413	2.75988e-08
SH3BGRL3	1.87813e-12	0.648958	0.904	0.611	2.77119e-08
C1S	1.92016e-12	-1.15252	0.041	0.48	2.8332e-08
EZR	2.21459e-12	0.604154	0.877	0.512	3.26763e-08
DNAJC5	2.26654e-12	0.655843	0.671	0.312	3.34428e-08
CTBP1	2.81024e-12	-0.798928	0.123	0.555	4.14651e-08
COL6A3	3.03412e-12	-1.06489	0.082	0.509	4.47685e-08
SYNE2	3.45288e-12	-0.889698	0.178	0.585	5.09473e-08
ABHD12	4.36156e-12	0.422695	0.507	0.176	6.43548e-08
ATP13A4	4.37322e-12	0.530403	0.658	0.275	6.45268e-08
RBM47	4.73254e-12	0.457737	0.507	0.179	6.98287e-08
PPDPF	4.98437e-12	0.576745	0.986	0.942	7.35443e-08
PDCD6	5.05925e-12	0.712349	0.699	0.353	7.46492e-08
KLHL2	5.06535e-12	0.332718	0.301	0.069	7.47392e-08
TTC22	5.08031e-12	0.410499	0.644	0.257	7.496e-08
HDGF	5.10124e-12	-0.741719	0.37	0.761	7.52688e-08
HNRNPD	5.57129e-12	-0.839768	0.151	0.568	8.22044e-08
ITM2B	5.61313e-12	-0.542963	1	1	8.28217e-08
PRDM1	5.76489e-12	0.659136	0.562	0.22	8.50609e-08
MVK	5.87654e-12	0.520599	0.534	0.2	8.67084e-08
HNRNPA0	6.11665e-12	-0.770159	0.288	0.679	9.02511e-08
HMOX2	6.45784e-12	0.543515	0.575	0.232	9.52854e-08
FUS	6.62382e-12	-0.75176	0.233	0.652	9.77345e-08
PELI1	6.75095e-12	0.417946	0.438	0.14	9.96103e-08
EPHX3	6.79645e-12	0.364933	0.507	0.166	1.00282e-07
CAST	7.76088e-12	0.468232	0.959	0.767	1.14512e-07
KIF1C	7.93674e-12	0.528951	0.753	0.365	1.17107e-07
EID1	8.38524e-12	-0.793598	0.082	0.499	1.23724e-07
MFSD5	8.50036e-12	0.365951	0.452	0.144	1.25423e-07
APP	8.51729e-12	-0.896681	0.178	0.577	1.25673e-07
HLA-E	8.59824e-12	-0.652355	0.932	0.968	1.26867e-07
MMP2	8.9136e-12	-1.26729	0.082	0.49	1.3152e-07
TP53BP2	9.35904e-12	0.393196	0.397	0.116	1.38093e-07
GPNMB	1.02477e-11	-0.741322	0.055	0.479	1.51205e-07
SET	1.08842e-11	-0.768576	0.233	0.647	1.60596e-07
LRATD2	1.10559e-11	0.359819	0.342	0.091	1.6313e-07
C6orf132	1.12042e-11	0.846971	0.89	0.658	1.65318e-07
ARPC3	1.1584e-11	0.409577	0.753	0.328	1.70922e-07
ITSN2	1.21128e-11	0.330313	0.37	0.102	1.78725e-07
MRC2	1.53708e-11	-0.78057	0.055	0.474	2.26796e-07
FLG	1.59801e-11	0.614058	0.521	0.198	2.35786e-07
RAB5B	1.80488e-11	0.49897	0.74	0.367	2.6631e-07
LAMA5	1.81559e-11	-0.82168	0.096	0.5	2.67891e-07
WDR26	1.97663e-11	0.682278	0.671	0.349	2.91652e-07
CREBZF	2.06034e-11	-0.733251	0.082	0.49	3.04004e-07
PNRC1	2.07495e-11	-0.712561	0.068	0.484	3.06159e-07
COL14A1	2.16578e-11	-0.840079	0	0.407	3.19561e-07
CUL3	2.35737e-11	0.424574	0.616	0.251	3.47831e-07
NUCB2	2.48186e-11	0.330461	0.397	0.116	3.66198e-07
FSTL1	2.54828e-11	-0.964282	0.068	0.472	3.75999e-07
BGN	2.58781e-11	-0.858676	0.027	0.433	3.81832e-07
ABHD17C	2.71798e-11	0.377536	0.425	0.132	4.01037e-07
HNRNPAB	2.84353e-11	-0.733769	0.164	0.564	4.19563e-07
CHAC1	2.99472e-11	0.264153	0.164	0.023	4.4187e-07
MACC1	3.13453e-11	0.338008	0.37	0.105	4.62501e-07
LAYN	3.27812e-11	0.315203	0.26	0.056	4.83686e-07
FAM180A	3.75586e-11	0.25587	0.192	0.032	5.54177e-07
SERPINB6	3.83561e-11	0.372332	0.507	0.179	5.65945e-07
CLIP1	4.14944e-11	0.562691	0.822	0.458	6.12249e-07
NCK2	4.436e-11	0.550427	0.753	0.404	6.54531e-07
SOWAHC	4.75564e-11	0.296637	0.37	0.104	7.01695e-07
CRIP2	5.60335e-11	-0.751768	0.096	0.491	8.26774e-07
DUSP14	6.55066e-11	0.592214	0.589	0.254	9.6655e-07
EHD3	6.55862e-11	0.301206	0.247	0.052	9.67724e-07
SPON2	6.77841e-11	-0.778478	0.082	0.481	1.00015e-06
NCOA2	6.80689e-11	0.362811	0.479	0.167	1.00436e-06
SERBP1	7.14752e-11	-0.672726	0.562	0.842	1.05462e-06
THBS2	7.2192e-11	-0.944737	0.041	0.435	1.06519e-06
COL18A1	9.00188e-11	-0.739622	0.014	0.404	1.32823e-06
NUPR1	9.20418e-11	-0.749455	0.178	0.562	1.35808e-06
AREG	9.60737e-11	0.308733	0.37	0.106	1.41757e-06
DYNLT3	9.61958e-11	0.479581	0.658	0.303	1.41937e-06
LTA4H	9.66625e-11	0.403958	0.507	0.188	1.42626e-06
NBL1	1.16169e-10	-0.850533	0.137	0.521	1.71408e-06
VAT1	1.25315e-10	0.602423	0.699	0.354	1.84902e-06
CALD1	1.28903e-10	-0.764332	0.11	0.494	1.90196e-06
EIF4A2	1.50888e-10	-0.728473	0.082	0.472	2.22635e-06
IGKC	1.60404e-10	-2.69486	1	1	2.36676e-06
TPSB2	1.60431e-10	-1.00992	0.055	0.443	2.36716e-06
NFIC	1.60634e-10	-0.759937	0.205	0.558	2.37015e-06
GALNT1	1.6945e-10	0.701096	0.644	0.337	2.50023e-06
ITGB5	1.7355e-10	-0.711759	0.082	0.466	2.56073e-06
WWC1	1.77361e-10	0.370198	0.315	0.087	2.61696e-06
RAET1E	1.94069e-10	0.434223	0.507	0.192	2.86349e-06
MPRIP	1.99733e-10	0.454893	0.589	0.262	2.94706e-06
POSTN	2.0593e-10	-0.959528	0.055	0.435	3.0385e-06
SLC37A2	2.11964e-10	0.45291	0.342	0.099	3.12752e-06
DST	2.18034e-10	-0.933171	0.178	0.552	3.21709e-06
STRN	2.55698e-10	0.327317	0.493	0.177	3.77282e-06
HLA-C	2.59313e-10	-0.850391	0.178	0.537	3.82617e-06
DDX39B	2.67371e-10	-0.681981	0.274	0.642	3.94505e-06
LGALS1	2.71305e-10	-0.805368	0.055	0.433	4.00311e-06
DENND2C	2.81262e-10	0.417297	0.493	0.189	4.15002e-06
CITED2	3.18311e-10	0.712777	0.589	0.274	4.69668e-06
DUOX1	3.21748e-10	0.557974	0.808	0.473	4.74738e-06
CFD	3.22916e-10	-0.886631	0.027	0.403	4.76462e-06
UGCG	3.65892e-10	0.418338	0.603	0.248	5.39874e-06
PINK1	3.90286e-10	0.371785	0.425	0.148	5.75867e-06
NECTIN2	3.99532e-10	0.330603	0.425	0.144	5.89509e-06
N4BP3	4.08571e-10	0.318272	0.301	0.081	6.02847e-06
MT1X	4.3073e-10	-0.954301	0.151	0.51	6.35542e-06
PHACTR4	4.42634e-10	0.559748	0.493	0.197	6.53107e-06
GPX4	4.56057e-10	-0.722471	0.164	0.528	6.72912e-06
HSPG2	6.70857e-10	-0.726937	0.055	0.424	9.89849e-06
B2M	6.76327e-10	-0.672824	1	0.987	9.97921e-06
BLZF1	7.14091e-10	0.401018	0.479	0.185	1.05364e-05
SELENOP	7.18473e-10	-0.672743	0.082	0.451	1.06011e-05
CNBP	7.32285e-10	-0.59545	0.479	0.766	1.08049e-05
ACOX1	7.6278e-10	0.334335	0.425	0.147	1.12548e-05
PTPN3	8.13118e-10	0.492026	0.452	0.174	1.19976e-05
TLE5	8.33582e-10	-0.682759	0.397	0.715	1.22995e-05
GTF2I	8.55842e-10	-0.666399	0.288	0.64	1.2628e-05
STK38L	8.7874e-10	0.355602	0.356	0.111	1.29658e-05
SQSTM1	9.10282e-10	-0.613934	0.534	0.851	1.34312e-05
GIPC1	9.24995e-10	0.459499	0.918	0.657	1.36483e-05
IGHA1	9.83014e-10	-2.29734	0.507	0.752	1.45044e-05
FCGRT	1.00386e-09	-0.649161	0.055	0.419	1.4812e-05
UBTF	1.10639e-09	-0.662812	0.096	0.458	1.63247e-05
PA2G4	1.12405e-09	-0.71163	0.178	0.529	1.65854e-05
KIF13B	1.17715e-09	0.359831	0.411	0.142	1.73688e-05
CST3	1.18037e-09	-0.557567	0.808	0.904	1.74163e-05
OGT	1.21201e-09	-0.661992	0.11	0.476	1.78832e-05
TM7SF2	1.23172e-09	0.360231	0.452	0.163	1.8174e-05
RAB5A	1.23538e-09	0.455404	0.753	0.401	1.82281e-05
ERV3-1	1.24603e-09	0.328235	0.411	0.139	1.83852e-05
ANXA5	1.29825e-09	-0.661992	0.041	0.41	1.91556e-05
RASSF5	1.44331e-09	0.356534	0.493	0.193	2.12961e-05
HK2	1.48423e-09	0.378847	0.452	0.169	2.18998e-05
ZRANB1	1.55151e-09	0.306869	0.329	0.098	2.28925e-05
SLC25A23	1.6612e-09	0.316313	0.452	0.164	2.4511e-05
MAP3K9	1.73603e-09	0.46712	0.411	0.15	2.56151e-05
KRT24	1.74903e-09	0.335512	0.301	0.083	2.5807e-05
HBP1	1.81873e-09	0.457728	0.534	0.233	2.68354e-05
SLC12A6	1.9855e-09	0.334403	0.452	0.167	2.9296e-05
RAB25	2.05471e-09	0.535884	0.726	0.413	3.03173e-05
TXNDC5	2.0581e-09	-0.879855	0.137	0.5	3.03672e-05
RGS2	2.10038e-09	0.396799	0.315	0.095	3.0991e-05
MLLT6	2.23077e-09	-0.684212	0.11	0.467	3.29149e-05
IDI1	2.30728e-09	0.396631	0.521	0.218	3.40439e-05
KTN1	2.51307e-09	-0.694027	0.137	0.482	3.70803e-05
UBA52	2.58148e-09	-0.548102	0.849	0.935	3.80898e-05
WDR6	2.59565e-09	-0.627058	0.041	0.392	3.82988e-05
RNF169	2.62723e-09	0.480452	0.37	0.13	3.87647e-05
PLSCR1	2.67775e-09	0.412522	0.493	0.2	3.95102e-05
CLU	2.81611e-09	-0.859438	0.027	0.375	4.15517e-05
CEBPD	2.87726e-09	-0.664936	0.192	0.538	4.24539e-05
VCAN	2.88183e-09	-0.856127	0.041	0.394	4.25215e-05
TICAM1	3.05313e-09	0.323508	0.288	0.081	4.5049e-05
LGALS3BP	3.10839e-09	-0.718936	0.315	0.63	4.58643e-05
NR4A1	3.22563e-09	-0.948183	0.11	0.451	4.75942e-05
LUC7L	3.48127e-09	-0.59577	0.055	0.404	5.13662e-05
HNRNPR	3.48152e-09	-0.668535	0.178	0.532	5.13698e-05
SFT2D2	3.63036e-09	0.404082	0.603	0.268	5.3566e-05
TSG101	3.63935e-09	0.327507	0.493	0.194	5.36985e-05
MAZ	3.75023e-09	-0.679066	0.123	0.477	5.53346e-05
SYTL1	3.79516e-09	-0.689933	0.151	0.496	5.59975e-05
CTSD	3.84161e-09	-0.535268	0.658	0.89	5.66829e-05
SASH1	3.96969e-09	0.418061	0.562	0.252	5.85727e-05
BTG2	3.98334e-09	-0.669871	0.11	0.466	5.87741e-05
AMFR	4.00175e-09	0.375161	0.507	0.208	5.90459e-05
HNRNPUL2	4.10033e-09	-0.662661	0.26	0.594	6.05004e-05
TOP1	4.22674e-09	0.697904	0.685	0.403	6.23656e-05
BX255925.3	4.28887e-09	0.342742	0.452	0.171	6.32823e-05
HOMER2	4.31336e-09	0.372634	0.63	0.288	6.36436e-05
HP1BP3	4.34178e-09	-0.658344	0.192	0.534	6.4063e-05
PDLIM2	4.45485e-09	0.52473	0.658	0.363	6.57314e-05
NAMPT	4.51275e-09	0.429314	0.507	0.219	6.65856e-05
B4GALT1	4.73901e-09	0.463448	0.534	0.24	6.99241e-05
ST14	4.75846e-09	0.362321	0.685	0.325	7.0211e-05
HNRNPH3	4.93598e-09	-0.592267	0.068	0.421	7.28303e-05
H1FX	5.04575e-09	-0.724728	0.219	0.539	7.44501e-05
MYO1E	5.07171e-09	0.336794	0.425	0.156	7.48331e-05
TMEM165	5.16576e-09	-0.630461	0.11	0.458	7.62209e-05
SF1	5.81592e-09	-0.628045	0.151	0.498	8.58139e-05
RSRP1	5.88992e-09	-0.631586	0.151	0.494	8.69057e-05
ARL6IP4	6.54305e-09	-0.634227	0.219	0.562	9.65426e-05
DKK3	6.68429e-09	-0.685049	0.082	0.422	9.86266e-05
SLC2A4RG	6.71497e-09	-0.689615	0.178	0.508	9.90794e-05
RNF213	6.88567e-09	-0.619024	0.068	0.416	0.000101598
TCF25	7.33603e-09	-0.657048	0.205	0.553	0.000108243
FBLN2	7.68261e-09	-0.776064	0.082	0.418	0.000113357
ARHGAP32	8.23774e-09	0.348455	0.603	0.273	0.000121548
ITPKC	8.42573e-09	0.513929	0.534	0.253	0.000124322
AQP1	8.51428e-09	-0.838999	0.055	0.395	0.000125628
ZRANB2	8.7649e-09	-0.59742	0.11	0.448	0.000129326
YPEL5	8.85592e-09	0.455925	0.603	0.299	0.000130669
LAMB2	8.86889e-09	-0.665227	0.096	0.437	0.000130861
FMOD	9.05814e-09	-0.766059	0.082	0.416	0.000133653
CTNNA1	9.18204e-09	0.432541	0.822	0.49	0.000135481
SRSF3	9.24125e-09	-0.653222	0.356	0.641	0.000136355
TPM2	9.50538e-09	-0.643996	0.055	0.39	0.000140252
HNRNPU	9.53758e-09	-0.618403	0.137	0.476	0.000140727
PNISR	9.69018e-09	-0.611951	0.137	0.478	0.000142979
TIMP3	9.69346e-09	-0.75133	0.014	0.343	0.000143027
NUMA1	9.78903e-09	-0.622521	0.288	0.596	0.000144437
KPRP	1.04688e-08	0.340331	0.301	0.089	0.000154467
OCLN	1.04786e-08	0.426457	0.466	0.181	0.000154612
RBM25	1.1388e-08	-0.562396	0.055	0.389	0.00016803
AUTS2	1.1402e-08	-0.555475	0.041	0.373	0.000168236
ZBED2	1.16553e-08	0.29229	0.26	0.071	0.000171974
MPZL3	1.172e-08	0.384266	0.479	0.193	0.000172928
DDRGK1	1.18968e-08	-0.635672	0.164	0.507	0.000175537
SH2D4A	1.19998e-08	0.263673	0.329	0.102	0.000177058
SOD3	1.26448e-08	-0.748466	0.068	0.399	0.000186574
FAM193B	1.26703e-08	-0.572376	0.096	0.431	0.000186951
PPP2R2A	1.28279e-08	0.4035	0.562	0.266	0.000189276
TRIM22	1.30312e-08	-0.592233	0.068	0.402	0.000192276
PLXNB1	1.30403e-08	-0.679031	0.164	0.497	0.00019241
BRD4	1.31684e-08	-0.590186	0.178	0.515	0.0001943
CTSK	1.33249e-08	-0.835822	0.082	0.422	0.000196608
SPRR2B	1.37326e-08	0.272152	0.301	0.089	0.000202624
RSL1D1	1.37873e-08	-0.598442	0.055	0.386	0.000203431
ACAP3	1.44635e-08	-0.66378	0.356	0.648	0.000213408
MXI1	1.45797e-08	0.500429	0.603	0.298	0.000215124
COL5A1	1.49208e-08	-0.726926	0.068	0.397	0.000220157
ADAR	1.51269e-08	-0.580387	0.11	0.441	0.000223197
CMPK1	1.55988e-08	0.417707	0.767	0.43	0.00023016
F11R	1.56771e-08	0.35188	0.658	0.315	0.000231316
ARHGAP10	1.77019e-08	0.316313	0.329	0.106	0.000261192
LAMTOR4	1.81533e-08	-0.607391	0.123	0.449	0.000267852
BTBD11	1.81768e-08	0.261643	0.315	0.098	0.000268199
OTOP3	1.82028e-08	0.285146	0.233	0.059	0.000268582
LY6K	1.99763e-08	0.294037	0.205	0.048	0.000294751
ABCC5	2.01124e-08	-0.639688	0.082	0.414	0.000296759
MED13L	2.015e-08	-0.661271	0.219	0.534	0.000297313
LTBP3	2.10155e-08	-0.628825	0.137	0.466	0.000310083
SQOR	2.22726e-08	0.402542	0.603	0.297	0.000328632
SDF4	2.2943e-08	-0.570472	0.151	0.496	0.000338524
IVNS1ABP	2.33708e-08	-0.650258	0.274	0.578	0.000344836
UBE2G2	2.41335e-08	-0.533591	0.068	0.401	0.00035609
NONO	2.44238e-08	-0.617091	0.178	0.505	0.000360373
HTRA1	2.45207e-08	-0.659468	0.068	0.392	0.000361802
PILRB	2.60029e-08	-0.603335	0.11	0.433	0.000383672
CTSB	2.82714e-08	0.404222	0.918	0.723	0.000417145
SCAMP2	2.92029e-08	0.353104	0.658	0.324	0.000430889
TAF15	3.03916e-08	-0.648155	0.288	0.586	0.000448428
PFN1	3.07949e-08	-0.584818	0.726	0.946	0.000454379
ITGB4	3.09201e-08	-0.707975	0.082	0.406	0.000456226
USP22	3.10143e-08	-0.629194	0.233	0.534	0.000457616
JAG1	3.11651e-08	-0.646395	0.192	0.515	0.000459841
PDGFRB	3.27345e-08	-0.673166	0.041	0.358	0.000482997
IER2	3.37314e-08	-0.661412	0.452	0.69	0.000497706
COX6B1	3.45036e-08	0.433182	0.836	0.499	0.000509101
GTPBP6	3.45436e-08	-0.504418	0.041	0.359	0.000509691
SF3B1	3.56255e-08	-0.612689	0.233	0.54	0.000525654
PARK7	3.56399e-08	-0.590683	0.123	0.443	0.000525867
MAP1B	3.56654e-08	-0.563912	0.014	0.324	0.000526243
CUL4A	3.60209e-08	-0.507527	0.055	0.374	0.000531488
HCAR2	3.67151e-08	0.298923	0.233	0.062	0.000541732
CLSTN1	3.70773e-08	-0.648532	0.205	0.527	0.000547076
CNKSR3	3.71821e-08	0.360634	0.411	0.16	0.000548622
NAB1	3.75457e-08	-0.661992	0.123	0.444	0.000553987
BOC	3.80025e-08	-0.657888	0.068	0.396	0.000560727
TMEM154	3.80564e-08	0.410038	0.63	0.311	0.000561523
CYB5R3	3.85856e-08	-0.629202	0.205	0.511	0.00056933
NFE2L1	3.8654e-08	-0.551289	0.096	0.418	0.00057034
ARHGEF1	4.01139e-08	-0.540327	0.041	0.363	0.000591881
DGCR8	4.23756e-08	-0.530248	0.027	0.339	0.000625252
SOCS3	4.27863e-08	-0.635346	0.055	0.37	0.000631312
IFI6	4.41218e-08	-0.804365	0.315	0.619	0.000651017
SPRR2G	4.59448e-08	-1.06665	0.479	0.856	0.000677915
USP53	4.69093e-08	0.369636	0.37	0.135	0.000692147
DLGAP4	4.705e-08	-0.549726	0.137	0.462	0.000694223
DMPK	4.82748e-08	-0.544546	0.027	0.337	0.000712295
IGKV4-1	4.9965e-08	-1.37813	0.068	0.377	0.000737234
RBM17	5.03701e-08	-0.525379	0.068	0.399	0.00074321
PPP1CC	5.24735e-08	0.473422	0.562	0.283	0.000774247
ACTB	5.35775e-08	0.289071	1	0.997	0.000790536
MYO6	5.37922e-08	0.417235	0.548	0.268	0.000793704
ZNF431	5.38237e-08	0.353221	0.315	0.105	0.000794169
TOB1	5.4591e-08	0.366249	0.616	0.302	0.000805491
TENT5A	5.54174e-08	-0.560113	0.041	0.352	0.000817684
KLK11	5.56757e-08	0.387183	0.945	0.659	0.000821495
MYH9	5.74053e-08	-0.567238	0.466	0.775	0.000847014
PHRF1	5.81115e-08	-0.554311	0.082	0.396	0.000857435
CSK	6.12408e-08	0.364276	0.603	0.293	0.000903608
MEGF6	6.1948e-08	-0.568008	0.082	0.401	0.000914043
ZFAND5	6.21464e-08	0.631925	0.671	0.415	0.00091697
SON	6.32353e-08	-0.574894	0.192	0.513	0.000933037
NME3	6.43246e-08	-0.5216	0.027	0.333	0.00094911
GANAB	6.44354e-08	-0.53921	0.068	0.381	0.000950744
MCM7	6.84801e-08	-0.519	0.068	0.387	0.00101042
NDST1	7.31367e-08	0.329291	0.685	0.345	0.00107913
MMP14	7.4752e-08	-0.700366	0.164	0.469	0.00110297
TENT5B	7.71187e-08	0.357003	0.671	0.344	0.00113789
SAFB	7.79068e-08	-0.532683	0.082	0.394	0.00114952
IP6K2	7.82909e-08	-0.598107	0.151	0.461	0.00115518
MAN2C1	7.86782e-08	-0.462586	0.027	0.33	0.0011609
EIF2S3	8.14729e-08	-0.549726	0.151	0.465	0.00120213
EIF3G	8.17782e-08	-0.543434	0.151	0.473	0.00120664
SIAH2	8.68987e-08	0.356212	0.479	0.213	0.00128219
NISCH	8.78643e-08	-0.610998	0.205	0.501	0.00129644
ANKRD11	8.89742e-08	-0.554504	0.178	0.491	0.00131281
ALDH2	8.92967e-08	-0.628007	0.123	0.429	0.00131757
COL7A1	8.97277e-08	-0.74663	0.123	0.424	0.00132393
EHD2	8.97298e-08	-0.52191	0.096	0.421	0.00132396
HDAC7	9.0463e-08	-0.523552	0.055	0.362	0.00133478
STAT2	9.06446e-08	-0.516141	0.068	0.377	0.00133746
ACER1	9.37353e-08	0.252223	0.205	0.051	0.00138306
EXT1	9.62026e-08	-0.57537	0.068	0.374	0.00141947
SRSF7	9.98046e-08	-0.557279	0.151	0.473	0.00147262
AZIN1	1.00241e-07	-0.489908	0.041	0.344	0.00147905
NFIX	1.02502e-07	-0.578673	0.096	0.407	0.00151241
PON2	1.04308e-07	-0.51774	0.027	0.326	0.00153907
ANKRD36C	1.06151e-07	-0.514966	0.041	0.343	0.00156625
LAMC1	1.09126e-07	-0.572089	0.082	0.388	0.00161015
MDM4	1.09321e-07	-0.559275	0.137	0.448	0.00161303
TRIM28	1.13025e-07	-0.563077	0.137	0.441	0.00166768
CRISPLD2	1.14016e-07	-0.621553	0.014	0.307	0.0016823
TNK2	1.1455e-07	-0.52899	0.096	0.403	0.00169019
LCE3E	1.15065e-07	0.939662	0.438	0.199	0.00169779
TAOK2	1.17799e-07	-0.420004	0	0.286	0.00173812
CENPB	1.22139e-07	-0.551835	0.096	0.407	0.00180216
APOE	1.23341e-07	-0.859506	0.082	0.38	0.0018199
DUT	1.25391e-07	-0.534498	0.068	0.377	0.00185015
REX1BD	1.30615e-07	-0.51401	0.041	0.34	0.00192722
DHX15	1.33491e-07	-0.522684	0.096	0.401	0.00196966
GRN	1.36235e-07	0.432603	0.726	0.416	0.00201015
RBM5	1.36716e-07	-0.522661	0.082	0.386	0.00201725
SIVA1	1.36903e-07	-0.537624	0.11	0.42	0.00202
TAPBP	1.38726e-07	-0.602576	0.178	0.483	0.0020469
DEK	1.39007e-07	-0.576552	0.137	0.437	0.00205105
TGOLN2	1.39142e-07	-0.528046	0.11	0.415	0.00205304
COMT	1.39787e-07	-0.615264	0.192	0.481	0.00206256
CWH43	1.40138e-07	0.273877	0.466	0.189	0.00206774
COLGALT1	1.42742e-07	-0.462749	0.014	0.303	0.00210616
KAZN	1.45639e-07	0.341622	0.397	0.159	0.00214891
JDP2	1.49699e-07	-0.586265	0.096	0.396	0.00220881
RHOT2	1.54205e-07	-0.488936	0.041	0.338	0.00227529
MXRA8	1.55233e-07	-0.695235	0.068	0.366	0.00229046
DSG1	1.55533e-07	-0.661992	0.932	0.961	0.00229489
GRB7	1.56531e-07	0.353451	0.384	0.15	0.00230962
GADD45GIP1	1.59329e-07	-0.510549	0.068	0.369	0.0023509
AGAP9	1.66208e-07	-0.500852	0.068	0.38	0.00245241
XPA	1.67279e-07	0.30929	0.356	0.131	0.0024682
SLC35C1	1.67279e-07	0.260143	0.342	0.121	0.00246821
HSPA1A	1.70037e-07	-0.619896	0.288	0.558	0.0025089
FAM214A	1.74494e-07	0.486318	0.507	0.247	0.00257467
COL12A1	1.83578e-07	-0.809701	0.068	0.363	0.0027087
TRAP1	1.84651e-07	-0.538678	0.137	0.452	0.00272453
RBM6	1.88145e-07	-0.552553	0.137	0.44	0.00277607
SMAGP	1.93019e-07	0.278806	0.356	0.132	0.002848
PPP4R2	1.96381e-07	-0.5109	0.082	0.387	0.0028976
CD9	1.98444e-07	0.379694	0.986	0.86	0.00292804
GPR157	2.01867e-07	0.294543	0.411	0.166	0.00297855
ATP5IF1	2.0192e-07	-0.584824	0.247	0.544	0.00297933
SUMO3	2.03896e-07	-0.520877	0.096	0.395	0.00300849
TNIP1	2.0585e-07	0.402977	0.521	0.245	0.00303731
PKD1	2.09591e-07	-0.522706	0.096	0.401	0.00309251
ADIPOR1	2.10276e-07	0.36448	0.534	0.248	0.00310262
RNF39	2.14585e-07	0.283949	0.274	0.086	0.0031662
GSTK1	2.17468e-07	-0.557656	0.178	0.469	0.00320874
SMG1	2.17846e-07	-0.574404	0.233	0.544	0.00321432
TCEAL4	2.19423e-07	-0.472302	0.041	0.333	0.00323758
IGHG4	2.23183e-07	-1.79943	0.137	0.43	0.00329307
BCL2L1	2.28076e-07	0.268708	0.466	0.197	0.00336527
[truncated: 1,471 more rows]

## Sheet: A1 - region 8
	p_val	avg_log2FC	pct.1	pct.2	p_val_adj
[truncated: 2,887 more rows]

[truncated: 1 more sheets: A1 - region 9]
