# Supplementary material for: Spatially resolved transcriptomics reveals pro-inflammatory fibroblast involved in lymphocyte recruitment through CXCL8 and CXCL10
Source: eLife. 2023 Jan 17;12:e81525. doi: 10.7554/eLife.81525 (PMC9897724; doi:10.7554/eLife.81525)
Supplement: Figure 2—source data 1. [file elife-81525-fig2-data1.xlsx]

## Sheet: B1 - cluster 1
	p_val	avg_log2FC	pct.1	pct.2	p_val_adj
SPRR2G	1.50386e-162	7.33731	1	0.999	2.69838e-158
LOR	1.64982e-162	8.00905	1	0.984	2.96027e-158
CDSN	9.16924e-162	7.20718	1	1	1.64524e-157
KLK10	3.25714e-161	3.97226	1	0.998	5.84429e-157
RPTN	5.49336e-161	7.70495	1	0.99	9.85673e-157
KLK5	2.26746e-160	3.475	1	1	4.06851e-156
HOPX	3.77839e-160	3.62956	1	1	6.77957e-156
POF1B	3.79167e-160	3.93222	1	1	6.80339e-156
LYPD5	8.62358e-160	4.47864	1	1	1.54733e-155
SPINK7	9.66771e-160	4.84795	1	1	1.73468e-155
IL36RN	1.03849e-159	4.34002	1	1	1.86337e-155
KRT80	1.22314e-159	5.16362	1	1	2.19469e-155
LCE3D	1.62929e-159	7.2706	1	0.995	2.92344e-155
ALOX12B	1.89439e-159	3.70267	1	1	3.3991e-155
SPINK5	2.1497e-159	3.5564	1	1	3.85721e-155
SLURP1	6.73864e-159	4.15889	1	1	1.20911e-154
HSPB8	1.03456e-158	3.22174	1	1	1.85631e-154
KLK7	1.30459e-158	3.35949	1	1	2.34082e-154
GLTP	5.84498e-158	2.20407	1	1	1.04877e-153
SLURP2	6.30593e-157	3.12664	1	0.998	1.13147e-152
LGALS1	2.87454e-156	-2.90922	1	1	5.15778e-152
CD74	6.82131e-156	-3.53199	1	1	1.22395e-151
CALML5	3.10082e-155	4.05626	1	0.982	5.5638e-151
KRT78	4.17003e-155	4.62297	1	0.999	7.48228e-151
TMPRSS11D	1.13395e-154	2.32814	1	1	2.03465e-150
GPX3	3.96655e-154	2.90391	1	1	7.11719e-150
TGM3	4.39484e-154	3.58734	1	1	7.88566e-150
PI3	8.18182e-154	4.13005	1	1	1.46806e-149
DMKN	3.60253e-153	3.02574	1	1	6.46402e-149
PPIF	5.09373e-153	4.11425	1	0.995	9.13967e-149
SPNS2	1.02029e-152	3.78622	1	1	1.8307e-148
FBLN1	1.64847e-152	-4.85789	1	1	2.95785e-148
LCE3E	2.47608e-152	5.18137	1	1	4.44283e-148
NCCRP1	6.39924e-152	3.54701	1	1	1.14822e-147
NR4A2	1.08084e-151	-3.37649	0.986	1	1.93936e-147
COL12A1	1.1856e-151	-5.10132	1	1	2.12732e-147
CNFN	5.61411e-150	3.97643	1	1	1.00734e-145
DCN	4.78373e-149	-6.67738	1	1	8.58344e-145
HSPG2	1.43419e-148	-3.53999	1	1	2.57337e-144
S100A4	7.89106e-148	-3.56998	1	1	1.41589e-143
SPRR2D	1.69977e-147	3.79602	1	0.997	3.04989e-143
KRT24	4.14309e-146	2.99281	1	1	7.43395e-142
CTSK	3.56587e-145	-4.01754	1	1	6.39824e-141
TMPRSS11B	5.02653e-145	3.27477	1	1	9.0191e-141
COL5A1	4.55576e-144	-3.80595	0.986	1	8.1744e-140
LAMA4	4.84707e-142	-2.23299	1	1	8.69709e-138
HTRA1	5.4931e-141	-3.90966	1	1	9.85627e-137
CRCT1	8.43671e-141	4.02544	1	0.982	1.5138e-136
COL6A1	1.54414e-140	-5.83965	0.996	0.991	2.77065e-136
KRT10	1.29305e-139	3.3328	1	1	2.32011e-135
S100A7	5.18614e-139	3.39915	1	0.998	9.30549e-135
CRNN	5.72558e-139	3.03179	1	1	1.02734e-134
KCTD12	1.08843e-138	-2.48037	1	1	1.95298e-134
PPL	1.85849e-138	2.7887	1	1	3.33469e-134
KLK6	5.17074e-138	2.7807	1	1	9.27785e-134
PRSS27	4.89896e-135	1.83053	1	0.998	8.79021e-131
SPRR3	7.10488e-135	2.7826	1	1	1.27483e-130
SERPINB13	1.48566e-134	2.14591	1	1	2.66572e-130
KLK12	4.45557e-134	2.76173	1	1	7.99463e-130
FSTL1	5.33428e-134	-3.9148	0.993	1	9.57129e-130
CLIC3	6.28279e-134	2.58228	1	1	1.12732e-129
SBSN	1.07492e-133	2.42766	1	1	1.92873e-129
MT1X	3.58659e-133	-3.76152	1	1	6.43543e-129
COL6A3	4.57551e-133	-4.40056	1	1	8.20984e-129
SCEL	1.33621e-132	1.90164	1	1	2.39755e-128
SAT1	1.71297e-132	-3.71569	0.986	0.999	3.07358e-128
KLK13	1.83558e-132	2.18425	1	1	3.29358e-128
FMOD	2.50302e-132	-3.93163	1	1	4.49117e-128
C1S	1.15536e-131	-4.78485	0.982	0.99	2.07307e-127
IGFBP4	1.31086e-131	-5.65116	1	1	2.35207e-127
NR4A1	3.45843e-131	-5.4417	1	1	6.20547e-127
IGFBP7	4.95729e-131	-5.54029	1	0.994	8.89487e-127
VIM	2.27691e-130	-6.60345	0.989	1	4.08546e-126
BGN	6.72478e-130	-3.92304	1	1	1.20663e-125
SOCS3	1.12039e-129	-3.76999	0.993	0.999	2.01032e-125
SPRR1B	1.23344e-129	1.91903	1	1	2.21316e-125
PLPP3	2.14999e-129	-2.78334	0.968	0.989	3.85773e-125
PRRX1	8.28159e-129	-3.6504	0.978	0.999	1.48597e-124
GJB6	1.81719e-128	2.24279	1	1	3.26059e-124
LCN2	2.61802e-128	2.37888	1	1	4.6975e-124
CFD	3.75984e-126	-3.33009	0.914	0.999	6.74628e-122
COL6A2	3.03815e-125	-5.57321	1	1	5.45135e-121
ATF3	3.19477e-124	-3.66031	0.996	1	5.73238e-120
MT2A	3.54406e-124	-3.26779	1	1	6.3591e-120
COL5A2	5.83702e-124	-3.19834	1	1	1.04734e-119
IL36G	1.11221e-123	1.93764	1	0.975	1.99564e-119
S100A2	1.17592e-123	-4.08083	1	1	2.10996e-119
GJB2	2.69726e-123	1.70186	1	1	4.83969e-119
RGS3	1.31256e-122	-1.79079	1	1	2.35513e-118
LUM	2.29253e-122	-6.71066	1	1	4.11348e-118
IFITM3	3.99399e-122	-4.24313	1	1	7.16641e-118
SPARC	1.42867e-120	-6.93032	1	1	2.56346e-116
MMP2	1.67112e-118	-6.45697	1	0.998	2.99849e-114
DST	3.61647e-118	-3.89673	0.982	1	6.48903e-114
RHCG	1.49149e-117	2.00707	1	1	2.67618e-113
IFITM2	6.05894e-117	-4.14257	0.996	0.999	1.08716e-112
KRTDAP	6.32292e-116	2.37906	1	0.998	1.13452e-111
TGM1	1.49809e-115	1.74372	1	0.989	2.68802e-111
SOD3	7.7347e-115	-4.20513	1	0.995	1.38784e-110
FBN1	3.64287e-114	-3.6711	0.996	0.999	6.5364e-110
PDGFRB	1.02239e-113	-2.36415	1	1	1.83447e-109
COL4A2	2.54045e-113	-2.25973	0.996	0.998	4.55834e-109
C1R	2.91631e-113	-5.04357	0.957	1	5.23274e-109
MAL	8.41923e-113	0.358068	1	0.99	1.51066e-108
CXCL14	1.13922e-112	-3.71048	1	1	2.0441e-108
CCN1	3.32921e-112	-4.35598	0.996	0.991	5.97359e-108
CTNNBIP1	3.50297e-112	1.59336	1	1	6.28538e-108
SERPING1	4.89481e-112	-2.32508	1	1	8.78275e-108
FGFR1	2.05888e-111	-2.53311	1	1	3.69425e-107
COL3A1	2.68417e-111	-7.7306	1	1	4.81621e-107
KRT76	2.8722e-111	2.51524	1	1	5.15359e-107
APOD	3.67871e-110	-3.10694	0.939	0.998	6.6007e-106
AQP1	3.31008e-109	-3.88353	1	1	5.93928e-105
CXCL12	8.02743e-109	-4.72797	1	1	1.44036e-104
CCN2	1.13663e-108	-4.28504	0.993	1	2.03946e-104
TIMP3	1.78086e-108	-3.74866	0.964	0.968	3.1954e-104
TPM1	7.67495e-107	-1.99128	1	1	1.37712e-102
MYL9	1.05271e-106	-3.66625	1	1	1.88887e-102
COL14A1	1.79528e-106	-2.3529	1	1	3.22127e-102
DKK3	3.95112e-106	-3.07707	1	1	7.08949e-102
CFH	5.51578e-106	-2.88786	1	1	9.89697e-102
COL4A1	3.44374e-105	-2.24265	0.943	0.975	6.17909e-101
IGFBP5	3.73295e-103	-5.48736	1	1	6.69803e-99
KRT1	3.89447e-103	1.99451	1	1	6.98786e-99
IVL	3.00007e-102	1.93755	1	1	5.38303e-98
TNS4	4.01059e-101	-3.01664	0.907	0.993	7.1962e-97
KRT15	4.3465e-101	-4.4305	1	1	7.79892e-97
KRT3	3.4803e-100	1.7731	1	0.992	6.24471e-96
RGS5	7.37951e-100	-2.0215	1	0.997	1.32411e-95
FBLN2	1.57035e-99	-2.923	0.803	0.972	2.81768e-95
THBS2	2.35019e-99	-4.23011	0.95	0.997	4.21695e-95
PDGFRA	2.48469e-99	-2.20173	0.978	0.997	4.45827e-95
SOD2	3.58894e-98	-3.72808	1	1	6.43963e-94
LAMB3	2.09824e-97	-2.87607	1	0.99	3.76486e-93
SLIT3	3.20005e-96	-2.11626	1	0.995	5.74186e-92
PCOLCE	8.5225e-95	-3.82723	1	0.99	1.52919e-90
THY1	1.86526e-94	-2.79554	0.946	0.993	3.34683e-90
SPARCL1	6.07324e-93	-2.88076	0.982	0.997	1.08972e-88
SLPI	1.68123e-92	1.30722	1	1	3.01664e-88
ACTA2	2.1294e-91	-3.78462	0.932	0.988	3.82079e-87
CD24	4.22279e-91	1.40735	1	1	7.57695e-87
SERPINF1	8.76089e-91	-4.12015	1	1	1.57197e-86
EVPL	7.9693e-88	1.10574	1	1	1.42993e-83
AEBP1	5.43739e-87	-5.77772	1	0.998	9.75631e-83
COL1A1	1.9218e-86	-8.22178	1	1	3.44829e-82
SPRR2F	5.03114e-79	0.296164	1	0.984	9.02737e-75
COL1A2	6.80663e-79	-7.24745	1	1	1.22131e-74
MXRA8	3.24557e-78	-3.4798	0.986	0.999	5.82353e-74
CLDN4	4.13057e-78	0.400776	1	1	7.41148e-74
IGFBP2	6.1937e-78	-2.48746	1	1	1.11134e-73
RARRES2	7.17597e-78	-2.19047	1	1	1.28758e-73
HIST1H1B	1.80848e-77	-2.16048	1	0.999	3.24495e-73
RASD1	2.29161e-75	-2.16907	0.986	0.997	4.11184e-71
NFATC4	1.14511e-74	-2.57732	1	0.999	2.05467e-70
DSG1	1.95888e-73	1.36474	1	1	3.51482e-69
COL17A1	1.4587e-71	-3.20564	1	1	2.61734e-67
PTGDS	2.10448e-71	-1.9347	1	0.995	3.77607e-67
IGHG2	6.37435e-71	-6.92581	1	0.999	1.14375e-66
FOSB	1.7921e-69	-4.18424	1	1	3.21556e-65
DSC2	1.93827e-69	1.14995	1	1	3.47783e-65
ODAPH	2.34155e-68	-1.44705	1	1	4.20144e-64
TACSTD2	4.5082e-65	0.333715	1	1	8.08906e-61
ASPN	2.85961e-64	-4.48949	0.853	0.962	5.131e-60
SELE	9.70409e-64	-1.75055	0.986	0.997	1.7412e-59
VCAN	1.29112e-61	-1.61535	1	1	2.31665e-57
JCHAIN	1.96317e-61	-5.15244	0.968	0.981	3.52252e-57
IGKC	5.49237e-61	-8.16881	1	1	9.85495e-57
IGHG4	4.66916e-60	-5.65326	0.982	0.998	8.37787e-56
A2M	4.34012e-57	-3.93059	0.968	0.951	7.78748e-53
IGHG1	1.76055e-55	-7.25336	1	1	3.15896e-51
EGR1	8.54565e-54	-3.28651	1	1	1.53335e-49
LRRC15	6.22896e-53	-3.28703	0.989	0.995	1.11766e-48
FN1	2.0268e-51	-4.43629	1	0.994	3.63669e-47
CLDN5	1.43121e-49	-2.38386	0.896	0.957	2.56802e-45
FDCSP	2.17515e-48	-5.49293	1	1	3.90287e-44
MFAP4	9.38238e-48	-2.28957	0.996	1	1.68348e-43
PHLDA1	9.51935e-48	-1.25675	1	1	1.70806e-43
TAGLN	5.41068e-47	-3.70306	0.996	0.987	9.70838e-43
IGHA1	5.40616e-45	-5.90676	0.996	0.999	9.70027e-41
KRT13	8.31351e-40	-2.7182	1	1	1.49169e-35
CRISPLD2	1.22878e-39	-2.87275	0.975	1	2.2048e-35
IGLC1	4.2955e-38	-5.2245	1	0.995	7.70741e-34
IGKV4-1	2.74623e-37	-2.61788	0.975	0.98	4.92756e-33
LAD1	5.57579e-35	0.617485	1	0.997	1.00046e-30
TM4SF1	1.63461e-34	-1.54843	0.978	0.998	2.93298e-30
GLUL	7.19891e-34	0.656288	1	1	1.2917e-29
CLU	1.40748e-27	-2.11049	1	1	2.52545e-23
TIMP2	2.31725e-27	-3.83581	1	0.994	4.15785e-23
POSTN	8.03757e-23	-5.74165	1	0.995	1.44218e-18
OLFML2B	2.13962e-21	-2.0243	1	1	3.83912e-17
IGFBP3	6.43965e-16	-1.16895	1	1	1.15547e-11
C11orf96	5.54122e-13	-2.57812	0.996	0.884	9.94262e-09
SFRP4	2.00181e-11	-4.87143	0.785	0.886	3.59184e-07
S100A14	6.65244e-11	-1.10628	1	1	1.19365e-06
OGN	5.56287e-08	-2.76417	0.989	0.972	0.000998145
ALDH3A1	4.02831e-07	-1.6297	1	0.999	0.00722799
CRTAC1	0.00127656	-2.65928	1	0.99	1
KRT4	0.0146954	-1.29851	0.993	0.99	1

## Sheet: B1 - cluster 2
	p_val	avg_log2FC	pct.1	pct.2	p_val_adj
KRT13	1.58045e-67	4.80798	1	1	2.8358e-63
KRT4	1.88061e-67	4.61708	1	0.99	3.37439e-63
TMPRSS11E	2.35608e-67	4.96722	1	0.997	4.22751e-63
MAL	3.65458e-67	5.73256	1	0.991	6.55741e-63
SPRR2F	4.13467e-67	5.52348	1	0.985	7.41884e-63
GJB2	5.20361e-67	2.78075	1	1	9.33684e-63
SLPI	6.41829e-67	2.80373	1	1	1.15163e-62
SPRR1B	6.60916e-67	2.09975	1	1	1.18588e-62
SCEL	1.44122e-66	3.52487	1	1	2.58597e-62
TGM1	2.063e-66	3.55187	1	0.99	3.70164e-62
EVPL	2.46176e-66	1.64689	1	1	4.41713e-62
KLK13	2.05722e-65	4.15171	1	1	3.69127e-61
CLIC3	2.57441e-65	3.03724	1	1	4.61926e-61
CD24	3.07647e-65	2.14319	1	1	5.52011e-61
KLK12	3.13796e-65	3.41131	1	1	5.63045e-61
SPRR3	1.07877e-64	3.75135	1	1	1.93564e-60
TACSTD2	2.61867e-64	2.73694	1	1	4.69868e-60
RHCG	1.92671e-63	3.09612	1	1	3.4571e-59
PRSS27	9.69995e-63	4.48041	1	0.998	1.74046e-58
A2M	1.23353e-62	-4.45364	0.226	0.985	2.21333e-58
SBSN	2.9768e-62	2.28581	1	1	5.34127e-58
IGFBP3	5.3609e-62	-2.67418	1	1	9.61906e-58
PPL	7.25801e-62	2.71854	1	1	1.3023e-57
TPM1	1.19346e-61	-1.96644	1	1	2.14142e-57
TIMP3	1.29214e-61	-3.97017	0.406	0.993	2.31849e-57
CLDN4	1.48584e-61	2.89825	1	1	2.66605e-57
CRISPLD2	2.42142e-61	-3.24583	1	0.997	4.34475e-57
CLU	2.70646e-61	-3.30974	1	1	4.8562e-57
S100A7	4.67784e-61	2.92075	1	0.998	8.39344e-57
LCN2	5.78051e-61	3.94254	1	1	1.0372e-56
GLUL	9.63395e-61	3.8077	1	1	1.72862e-56
TM4SF1	2.06242e-60	2.87643	1	0.996	3.70059e-56
RGS5	4.51828e-60	-2.07825	0.934	1	8.10715e-56
DST	5.60094e-60	-4.63389	0.991	0.998	1.00498e-55
LRRC15	1.00235e-59	-3.29705	0.981	0.995	1.79853e-55
BGN	1.20028e-58	-3.86672	0.991	1	2.15366e-54
CRNN	1.27395e-58	3.97477	1	1	2.28586e-54
COL17A1	2.32474e-58	-4.55946	1	1	4.17127e-54
PDGFRB	2.65905e-58	-2.30646	1	1	4.77114e-54
CXCL14	5.66965e-58	-4.60432	1	1	1.01731e-53
KRT1	4.79028e-57	-5.44823	1	1	8.59519e-53
IFITM2	6.68727e-57	-4.27924	0.981	1	1.1999e-52
PLPP3	2.33481e-56	-2.80595	0.991	0.986	4.18936e-52
FGFR1	7.31092e-56	-2.46335	1	1	1.3118e-51
PHLDA1	1.87667e-55	2.50979	1	1	3.36731e-51
KLK6	1.92077e-55	3.54678	1	1	3.44644e-51
GJB6	1.03449e-54	2.03987	1	1	1.85618e-50
COL5A2	3.20393e-53	-3.14054	1	1	5.74882e-49
ACTA2	5.31668e-53	-4.00632	0.849	0.987	9.53972e-49
SERPINB13	6.87039e-53	1.9554	1	1	1.23275e-48
TAGLN	1.42238e-52	-3.95138	0.858	0.994	2.55218e-48
SPRR2D	3.7191e-52	2.83779	1	0.997	6.67318e-48
TMPRSS11B	4.44908e-52	2.90372	1	1	7.98298e-48
AQP1	6.0229e-52	-4.11005	1	1	1.08069e-47
SERPINF1	1.34356e-51	-4.14555	1	1	2.41075e-47
SOD3	2.28844e-51	-4.23521	0.972	0.997	4.10615e-47
DKK3	7.76302e-51	-3.13506	1	1	1.39292e-46
COL6A2	8.2713e-51	-5.69692	1	1	1.48412e-46
PRRX1	2.48725e-50	-3.55206	0.972	0.997	4.46287e-46
RASD1	2.58672e-50	-2.16318	0.972	0.997	4.64135e-46
S100A14	1.51157e-49	1.43262	1	1	2.71222e-45
NCCRP1	6.56016e-48	2.39664	1	1	1.17709e-43
KRT10	6.74203e-48	-4.35862	1	1	1.20972e-43
CNFN	1.27366e-47	2.68737	1	1	2.28533e-43
KRT76	1.62818e-47	-4.79512	1	1	2.92145e-43
DMKN	1.95294e-47	2.1762	1	1	3.50415e-43
COL14A1	3.3885e-47	-2.29543	1	1	6.07998e-43
COL1A2	3.60175e-47	-7.68532	1	1	6.46263e-43
CRCT1	4.25905e-47	2.78498	1	0.984	7.64201e-43
PI3	8.40803e-47	2.08465	1	1	1.50865e-42
LAMA4	5.09767e-46	-2.14238	1	1	9.14675e-42
IL36G	4.04591e-45	2.25162	1	0.977	7.25958e-41
HTRA1	5.54953e-45	-3.73334	1	1	9.95753e-41
MT2A	6.18435e-45	-3.03337	1	1	1.10966e-40
GPX3	8.796e-45	2.13242	1	1	1.57827e-40
IGFBP7	3.32807e-44	-5.39352	0.896	0.999	5.97156e-40
KRT78	3.74081e-44	2.1018	1	0.999	6.71214e-40
FBN1	3.87661e-44	-3.5784	1	0.999	6.95581e-40
PPIF	5.66584e-44	1.89299	1	0.996	1.01662e-39
MYL9	8.01794e-44	-3.65964	1	1	1.43866e-39
NR4A2	1.0704e-43	-2.84728	1	0.998	1.92063e-39
IFITM3	1.1745e-43	-4.41792	1	1	2.10741e-39
TMPRSS11D	1.95762e-43	1.71351	1	1	3.51257e-39
COL5A1	4.40883e-43	-3.5961	1	0.998	7.91076e-39
SERPING1	9.94739e-43	-2.26909	1	1	1.78486e-38
SPNS2	1.14327e-42	1.81228	1	1	2.05138e-38
C1R	1.36572e-42	-4.93325	1	0.995	2.45051e-38
SLURP2	2.82831e-41	2.19354	1	0.998	5.07484e-37
SPARC	6.69833e-41	-6.75398	1	1	1.20188e-36
GLTP	7.5139e-41	1.75335	1	1	1.34822e-36
FBLN2	1.49501e-40	-2.88599	0.745	0.962	2.6825e-36
KRT3	8.45008e-40	-3.18259	0.991	0.993	1.5162e-35
VIM	1.03047e-38	-6.27963	1	0.999	1.84897e-34
KLK10	1.15045e-38	1.63993	1	0.998	2.06426e-34
HSPG2	1.40964e-38	-3.24066	1	1	2.52932e-34
KRT80	1.44994e-38	0.576212	1	1	2.60162e-34
COL6A3	2.40813e-38	-4.21201	1	1	4.3209e-34
POSTN	3.49897e-38	-5.89229	0.962	0.997	6.27821e-34
THY1	3.90045e-38	-2.68564	0.962	0.989	6.99858e-34
LUM	4.83243e-38	-6.53728	1	1	8.67082e-34
SPINK5	7.80839e-38	1.60738	1	1	1.40106e-33
HOPX	2.91072e-37	1.21599	1	1	5.2227e-33
MMP2	3.26321e-37	-6.31245	1	0.998	5.85517e-33
LYPD5	6.75873e-37	1.36334	1	1	1.21272e-32
SPINK7	2.72144e-36	1.68259	1	1	4.88307e-32
IL36RN	4.2255e-36	1.07754	1	1	7.58182e-32
CCN1	1.94299e-35	-4.17061	0.991	0.992	3.4863e-31
IGFBP4	3.34125e-35	-5.41179	1	1	5.9952e-31
FMOD	4.37914e-35	-3.80183	1	1	7.85749e-31
COL4A1	7.50387e-35	-2.1234	0.698	0.983	1.34642e-30
COL6A1	1.05998e-34	-5.27468	0.991	0.992	1.90193e-30
MT1X	1.98402e-33	-3.17917	1	1	3.55992e-29
NFATC4	2.84895e-33	-2.53338	1	0.999	5.11188e-29
HSPB8	5.24614e-33	0.894832	1	1	9.41314e-29
IGFBP5	8.90716e-33	-5.4044	1	1	1.59821e-28
CTSK	5.20892e-32	-3.78518	1	1	9.34636e-28
FN1	6.64046e-32	-4.56382	1	0.995	1.1915e-27
CFD	8.28117e-32	-3.11269	1	0.989	1.48589e-27
OGN	3.27307e-31	-2.79054	0.708	0.986	5.87287e-27
S100A4	4.49334e-31	-2.9305	1	1	8.0624e-27
IVL	4.70415e-31	1.45368	1	1	8.44065e-27
C1S	5.30256e-31	-4.44518	0.962	0.99	9.51439e-27
LAMB3	1.49582e-30	-2.44754	0.877	0.996	2.68395e-26
DCN	7.37844e-30	-5.32392	1	1	1.32391e-25
KLK7	8.82675e-30	1.16218	1	1	1.58378e-25
MXRA8	1.31782e-29	-3.47609	1	0.997	2.36457e-25
IGFBP2	5.39237e-29	-2.54807	1	1	9.67553e-25
CD74	7.57071e-29	-2.80843	1	1	1.35841e-24
AEBP1	1.04818e-28	-5.75261	1	0.998	1.88074e-24
FBLN1	1.98669e-28	-4.26514	1	1	3.56472e-24
KCTD12	2.9491e-28	-2.20018	1	1	5.29156e-24
NR4A1	3.63593e-28	-4.43078	1	1	6.52394e-24
HIST1H1B	5.08951e-28	-1.92615	1	0.999	9.13211e-24
COL1A1	1.79438e-27	-8.06378	1	1	3.21966e-23
COL3A1	8.58245e-27	-7.19817	1	1	1.53995e-22
ALOX12B	1.00334e-26	0.37938	1	1	1.80029e-22
LOR	2.31195e-25	-5.2237	0.915	0.989	4.14833e-21
FDCSP	3.26169e-25	2.47321	1	1	5.85245e-21
COL12A1	6.40442e-24	-4.65414	1	1	1.14915e-19
LGALS1	1.48475e-23	-2.55714	1	1	2.66408e-19
POF1B	1.8164e-23	-0.29428	1	1	3.25917e-19
FSTL1	2.65914e-23	-3.59292	1	0.999	4.7713e-19
SLURP1	3.29644e-23	-0.296525	1	1	5.9148e-19
COL4A2	1.58174e-22	-2.01121	0.962	1	2.83811e-18
RPTN	1.07172e-21	-3.97897	0.896	0.995	1.92299e-17
ODAPH	5.23634e-21	1.14982	1	1	9.39556e-17
EPPK1	9.79772e-21	-2.17404	1	1	1.75801e-16
RGS3	2.40925e-20	-1.59707	1	1	4.32293e-16
OLFML2B	4.9018e-20	-2.06892	1	1	8.7953e-16
PCOLCE	5.55849e-20	-3.59576	1	0.991	9.97361e-16
PTGDS	2.21759e-19	-1.88076	0.943	0.998	3.97903e-15
THBS2	2.22601e-19	-3.83465	1	0.992	3.99414e-15
RARRES2	2.77526e-19	-1.88257	1	1	4.97964e-15
CXCL12	2.69443e-18	-4.6295	1	1	4.83461e-14
KLK5	8.1e-17	0.461323	1	1	1.45338e-12
KRT15	1.24221e-16	-3.507	1	1	2.22889e-12
CLDN5	3.04088e-16	-2.38846	0.887	0.953	5.45625e-12
SELE	7.72476e-15	-1.61128	0.972	0.997	1.38605e-10
ALDH3A1	5.80371e-14	-2.0531	1	0.999	1.04136e-09
TNS4	9.87338e-14	-2.25591	1	0.982	1.77158e-09
ATF3	1.8371e-13	-1.92295	1	0.999	3.29631e-09
TIMP2	3.64721e-13	-3.44896	1	0.994	6.54419e-09
SFRP4	3.66253e-13	-4.94481	0.66	0.885	6.57168e-09
MFAP4	4.52134e-13	-2.21186	1	1	8.11264e-09
SPARCL1	4.9002e-13	-2.68861	1	0.995	8.79243e-09
APOD	5.22573e-13	-2.91119	0.991	0.991	9.37653e-09
DSG1	2.50404e-12	-2.71138	1	1	4.493e-08
CRTAC1	5.29479e-12	-2.74544	0.972	0.992	9.50044e-08
LCE3E	7.65325e-12	-0.816357	1	1	1.37322e-07
SLIT3	1.21736e-09	-1.89035	1	0.995	2.18431e-05
CCN2	3.28564e-09	-3.22309	1	0.999	5.89542e-05
KRTDAP	5.50639e-08	-1.21703	1	0.998	0.000988012
IGKV4-1	4.15408e-07	-2.5662	1	0.979	0.00745367
VCAN	4.25344e-06	-1.43557	1	1	0.0763194
SOCS3	6.94573e-06	-1.8554	1	0.998	0.124627
FOSB	7.04569e-06	-1.07122	1	1	0.126421
PDGFRA	1.08728e-05	-1.686	1	0.995	0.195091
ASPN	0.000108105	-4.22172	0.981	0.949	1
CDSN	0.000150141	-4.00331	1	1	1
SPRR2G	0.000574776	-2.84749	1	0.999	1
IGHG4	0.0143855	-4.67422	1	0.996	1
CFH	0.0342362	-0.846506	1	1	1
IGLC1	0.0415662	-4.74797	1	0.996	1
CTNNBIP1	0.0546519	-0.529245	1	1	1
SOD2	0.0938254	-0.500199	1	1	1
C11orf96	0.110366	-2.14123	1	0.892	1
LCE3D	0.286095	-1.62351	1	0.996	1
IGHG1	0.311646	-5.40515	1	1	1
IGHA1	0.346839	-4.68053	1	0.999	1
LAD1	0.403419	-0.434542	1	0.997	1
JCHAIN	0.503659	-3.91893	1	0.979	1
S100A2	0.657868	-0.679	1	1	1
CALML5	0.784403	-2.52475	1	0.984	1
IGHG2	0.986065	-5.09002	1	0.999	1
IGKC	0.989149	-5.51448	1	1	1

## Sheet: B1 - cluster 3
	p_val	avg_log2FC	pct.1	pct.2	p_val_adj
SOD2	4.06847e-122	-4.4152	1	1	7.30005e-118
DSC2	2.13804e-120	2.28828	1	1	3.83629e-116
TIMP2	2.47732e-120	-5.26565	0.933	1	4.44505e-116
DSG1	3.02465e-120	2.22662	1	1	5.42714e-116
LAD1	1.63294e-119	1.69678	1	0.997	2.92998e-115
IVL	2.54211e-118	2.35542	1	1	4.56131e-114
PHLDA1	9.20181e-117	-2.76571	1	1	1.65108e-112
NFATC4	4.13755e-116	-2.66695	0.995	1	7.42401e-112
SELE	7.41228e-115	-1.89311	0.995	0.996	1.32999e-110
EGR1	1.67469e-113	-4.43355	0.995	1	3.0049e-109
CFH	3.59655e-113	-2.89906	1	1	6.4533e-109
PCOLCE	4.01982e-113	-3.86693	0.919	0.998	7.21275e-109
KRTDAP	4.78627e-113	2.73267	1	0.998	8.588e-109
FOSB	2.96105e-108	-5.0305	1	1	5.31301e-104
THBS2	1.85313e-106	-4.3758	1	0.991	3.32508e-102
GLUL	2.73194e-106	-4.32744	1	1	4.90192e-102
IGFBP5	2.34241e-105	-5.83428	1	1	4.20298e-101
C11orf96	1.31706e-104	-2.85019	0.281	0.953	2.3632e-100
CTNNBIP1	1.14964e-102	1.59736	1	1	2.06279e-98
COL1A2	1.30974e-101	-7.83213	1	1	2.35006e-97
CCN2	7.22935e-101	-4.37308	0.995	0.999	1.29716e-96
SERPINF1	8.29653e-100	-4.19448	1	1	1.48865e-95
COL1A1	9.71088e-100	-8.83462	1	1	1.74242e-95
ATF3	5.69693e-99	-3.68632	0.995	1	1.0222e-94
RGS3	1.49273e-98	-1.77099	1	1	2.67841e-94
MXRA8	2.09579e-98	-3.60754	0.99	0.998	3.76047e-94
AEBP1	2.11777e-97	-6.10509	1	0.998	3.79991e-93
FN1	5.76259e-97	-4.74677	0.952	0.999	1.03398e-92
COL4A2	9.34851e-97	-2.25017	1	0.998	1.6774e-92
KRT3	1.3398e-96	2.73346	1	0.993	2.404e-92
COL3A1	2.12549e-95	-7.96755	1	1	3.81376e-91
CCN1	4.03764e-95	-4.43969	0.914	0.999	7.24474e-91
THY1	1.45725e-92	-2.82592	0.981	0.988	2.61474e-88
FDCSP	2.50187e-92	-6.11986	0.995	1	4.4891e-88
NR4A1	2.84496e-92	-5.531	1	1	5.1047e-88
VCAN	3.52701e-91	-1.66311	1	1	6.32852e-87
KRT1	6.54555e-91	2.0445	1	1	1.17447e-86
PDGFRA	1.71851e-90	-2.23675	0.971	0.997	3.08353e-86
SOCS3	2.42675e-90	-3.74137	0.99	0.999	4.35433e-86
TM4SF1	2.97401e-90	-2.9759	1	0.996	5.33627e-86
MFAP4	1.70876e-89	-2.40085	1	1	3.06603e-85
KRT76	2.63845e-89	2.43445	1	1	4.73418e-85
KRT10	2.48856e-88	2.16696	1	1	4.46522e-84
C1R	4.39401e-88	-5.05397	1	0.995	7.88418e-84
PTGDS	1.32664e-87	-1.9839	0.986	0.996	2.38038e-83
SERPING1	1.54028e-87	-2.3216	1	1	2.76373e-83
CXCL12	2.29384e-87	-4.74917	1	1	4.11583e-83
POSTN	3.19962e-85	-5.97333	0.986	0.997	5.74108e-81
KCTD12	1.19115e-84	-2.38656	1	1	2.13728e-80
SLPI	1.49566e-84	1.38695	1	1	2.68366e-80
FSTL1	1.99507e-84	-3.83831	1	0.999	3.57975e-80
ODAPH	3.22848e-84	-1.56417	1	1	5.79286e-80
IGHG4	6.88622e-84	-6.5041	0.986	0.997	1.23559e-79
EVPL	1.77589e-83	1.20964	1	1	3.18648e-79
COL14A1	9.92492e-83	-2.33369	1	1	1.78083e-78
MMP2	2.4042e-82	-6.3809	1	0.998	4.31385e-78
FBN1	3.12946e-82	-3.63683	1	0.999	5.6152e-78
MT1X	4.1951e-82	-3.67511	1	1	7.52727e-78
SPARC	1.02813e-81	-6.82599	1	1	1.84476e-77
FBLN2	1.28703e-81	-2.95719	0.876	0.96	2.30931e-77
IFITM3	1.30297e-81	-4.20113	1	1	2.33793e-77
KRT24	5.61627e-81	2.07926	1	1	1.00773e-76
IGKV4-1	1.2125e-80	-2.79462	0.838	0.993	2.17558e-76
MT2A	1.46215e-80	-3.19443	1	1	2.62353e-76
SAT1	6.26935e-80	-3.42949	1	0.997	1.12491e-75
COL6A3	2.20114e-79	-4.30426	1	1	3.94951e-75
CALML5	3.75582e-78	1.58728	1	0.983	6.73907e-74
RASD1	5.17591e-78	-2.17317	1	0.996	9.28714e-74
ASPN	1.25695e-77	-4.65851	0.867	0.958	2.25535e-73
IGFBP4	2.0137e-77	-5.52432	1	1	3.61317e-73
LUM	2.95952e-77	-6.61979	1	1	5.31026e-73
FGFR1	5.76727e-77	-2.48337	1	1	1.03482e-72
IGHA1	9.74376e-77	-6.26201	1	0.999	1.74832e-72
TPM1	1.31923e-76	-1.97389	1	1	2.3671e-72
CLDN5	1.97668e-76	-2.52424	0.719	0.972	3.54676e-72
DKK3	2.29637e-76	-3.03947	1	1	4.12037e-72
TGM3	2.29691e-76	2.04852	1	1	4.12134e-72
PDGFRB	1.59681e-75	-2.3281	1	1	2.86515e-71
IFITM2	1.61277e-75	-4.0456	1	0.999	2.8938e-71
JCHAIN	2.31807e-75	-5.29093	0.876	0.989	4.15932e-71
VIM	4.85228e-74	-6.30165	1	0.999	8.70645e-70
C1S	6.55755e-74	-4.60211	0.914	0.996	1.17662e-69
DCN	1.10784e-73	-6.1059	1	1	1.9878e-69
KRT15	1.11526e-73	-4.61787	1	1	2.0011e-69
CTSK	2.88153e-73	-3.88902	1	1	5.17033e-69
APOD	5.99958e-73	-3.10513	0.995	0.991	1.07651e-68
FBLN1	9.61651e-73	-4.60172	1	1	1.72549e-68
COL6A1	1.29444e-72	-5.36987	0.91	0.999	2.32261e-68
S100A4	2.66218e-72	-3.08998	1	1	4.77675e-68
IGHG1	1.43106e-71	-7.97073	1	1	2.56775e-67
SLURP1	4.91358e-71	1.30227	1	1	8.81645e-67
COL5A2	6.80383e-71	-3.08525	1	1	1.22081e-66
ALOX12B	1.2156e-70	0.987641	1	1	2.18115e-66
POF1B	2.80199e-70	0.675692	1	1	5.02761e-66
IGHG2	4.34961e-70	-7.40788	1	0.999	7.80451e-66
GJB6	1.24417e-69	1.69413	1	1	2.23241e-65
PRRX1	1.5747e-69	-3.52452	1	0.996	2.82548e-65
TGM1	2.52595e-69	1.30656	1	0.989	4.53231e-65
IGKC	2.84648e-69	-8.69974	1	1	5.10743e-65
CD74	8.35172e-69	-2.97583	1	1	1.49855e-64
OLFML2B	1.75645e-68	-2.13408	1	1	3.1516e-64
EPPK1	2.39595e-68	1.38628	1	1	4.29906e-64
FMOD	7.62546e-68	-3.89523	1	1	1.36824e-63
KLK7	1.45381e-67	1.58783	1	1	2.60858e-63
HSPG2	1.71468e-67	-3.19688	1	1	3.07666e-63
RGS5	4.3969e-67	-1.96341	1	0.997	7.88935e-63
SPRR2F	6.55652e-67	-4.56274	0.99	0.985	1.17644e-62
KLK5	6.92e-67	0.710027	1	1	1.24166e-62
COL6A2	9.31406e-67	-5.28421	1	1	1.67122e-62
CFD	1.38704e-66	-3.22771	0.995	0.989	2.48877e-62
A2M	1.98495e-65	-4.09296	0.957	0.953	3.56159e-61
RARRES2	2.3235e-65	-2.06549	1	1	4.16905e-61
COL5A1	2.3939e-65	-3.53633	1	0.998	4.29538e-61
BGN	5.74275e-65	-3.85388	1	1	1.03042e-60
COL12A1	2.11991e-64	-4.8634	1	1	3.80375e-60
HSPB8	7.26025e-64	0.8967	1	1	1.30271e-59
CD24	5.02487e-63	1.28814	1	1	9.01613e-59
LAMA4	7.41908e-63	-2.10955	1	1	1.33121e-58
SERPINB13	1.50466e-62	1.48622	1	1	2.6998e-58
AQP1	2.267e-62	-3.66439	1	1	4.06768e-58
HTRA1	2.83895e-62	-3.48605	1	1	5.09392e-58
MYL9	1.63338e-61	-3.61351	1	1	2.93078e-57
IGLC1	2.69397e-61	-5.96114	0.986	0.997	4.83379e-57
IGFBP7	6.32492e-61	-5.12353	0.995	0.994	1.13488e-56
HIST1H1B	2.85316e-60	-2.16393	1	0.999	5.11942e-56
SPINK5	3.53729e-60	0.832242	1	1	6.34696e-56
GLTP	9.54812e-60	1.57269	1	1	1.71322e-55
KRT80	1.81931e-59	-1.0802	1	1	3.2644e-55
HOPX	6.72349e-59	0.314013	1	1	1.2064e-54
TMPRSS11D	7.75069e-59	1.24488	1	1	1.39071e-54
SLIT3	1.66089e-58	-2.03275	1	0.995	2.98013e-54
SBSN	2.27689e-58	1.40906	1	1	4.08543e-54
PLPP3	2.64599e-58	-2.44448	0.914	0.993	4.7477e-54
S100A14	2.65883e-58	1.06425	1	1	4.77075e-54
KLK10	2.69051e-58	0.406224	1	0.998	4.82759e-54
ACTA2	6.03993e-58	-3.81483	0.99	0.981	1.08374e-53
GPX3	3.22519e-57	1.13475	1	1	5.78696e-53
NCCRP1	5.38174e-57	0.255775	1	1	9.65645e-53
SLURP2	8.20349e-57	0.823692	1	0.998	1.47195e-52
SPRR1B	2.11518e-56	1.314	1	1	3.79527e-52
CLIC3	2.5517e-56	0.868057	1	1	4.57851e-52
DMKN	2.59739e-56	0.383323	1	1	4.6605e-52
SCEL	3.09673e-56	0.433662	1	1	5.55646e-52
NR4A2	3.28111e-56	-2.30285	1	0.998	5.8873e-52
KRT78	4.26152e-56	-1.26794	1	0.999	7.64644e-52
GJB2	4.03297e-55	0.945422	1	1	7.23636e-51
SOD3	4.59951e-55	-4.13555	0.99	0.996	8.2529e-51
LGALS1	2.88445e-52	-2.63261	1	1	5.17557e-48
SPINK7	8.45297e-51	-1.10785	1	1	1.51672e-46
TIMP3	3.39022e-48	-3.3157	0.99	0.966	6.08307e-44
LYPD5	6.55068e-48	-1.24739	1	1	1.17539e-43
COL4A1	7.83393e-48	-2.06359	0.943	0.974	1.40564e-43
LRRC15	6.67939e-46	-3.26244	0.99	0.994	1.19848e-41
TNS4	2.05203e-45	-2.64744	0.986	0.983	3.68196e-41
TAGLN	2.25739e-44	-3.76254	0.971	0.99	4.05044e-40
CNFN	2.05001e-43	-1.07326	1	1	3.67834e-39
CRTAC1	1.03968e-40	-2.65955	0.99	0.991	1.8655e-36
TMPRSS11B	4.80653e-38	-0.58681	1	1	8.62436e-34
CRNN	2.56439e-33	-1.72833	1	1	4.60129e-29
RPTN	4.87673e-32	-2.79955	1	0.99	8.75032e-28
PPIF	1.43669e-31	-1.3511	1	0.996	2.57786e-27
CDSN	1.51754e-31	-2.94457	1	1	2.72292e-27
SPARCL1	2.95679e-31	-2.74498	1	0.995	5.30537e-27
KRT13	1.82938e-30	-3.18084	1	1	3.28246e-26
SFRP4	7.99295e-30	-5.19955	0.976	0.866	1.43418e-25
PRSS27	1.16149e-28	-1.5053	1	0.998	2.08406e-24
LAMB3	4.53742e-27	-2.1982	0.99	0.991	8.1415e-23
PI3	4.89868e-27	-1.6777	1	1	8.78971e-23
S100A7	5.03576e-27	-0.58315	1	0.998	9.03566e-23
SPRR3	2.8277e-26	-0.607667	1	1	5.07375e-22
CRISPLD2	7.17191e-26	-2.8047	1	0.996	1.28686e-21
SPNS2	2.38921e-24	-2.26763	1	1	4.28696e-20
SPRR2D	7.35017e-23	-1.77903	1	0.997	1.31884e-18
ALDH3A1	1.45578e-21	0.376405	1	0.999	2.6121e-17
CLU	3.95125e-19	-2.04899	1	1	7.08972e-15
S100A2	1.35745e-17	-1.88264	1	1	2.43568e-13
DST	1.82676e-17	-2.18025	1	0.997	3.27775e-13
LOR	1.79021e-15	-4.19182	0.99	0.986	3.21217e-11
KRT4	1.06511e-14	-1.56262	1	0.989	1.91114e-10
IGFBP2	1.20668e-14	0.397483	1	1	2.16514e-10
CXCL14	4.84471e-14	-1.71402	1	1	8.69285e-10
LCE3E	2.81373e-13	-2.76853	1	1	5.04867e-09
CRCT1	1.03065e-12	-4.70102	1	0.983	1.84929e-08
RHCG	1.71708e-12	-0.73561	1	1	3.08096e-08
LCE3D	3.80467e-08	-4.44761	1	0.996	0.000682672
TACSTD2	7.32699e-08	-0.672653	1	1	0.00131468
MAL	4.84758e-07	-2.1022	1	0.99	0.00869801
LCN2	1.04901e-06	-3.0833	1	1	0.0188225
IL36G	0.000226673	-1.7066	1	0.976	1
KLK6	0.01153	-2.4579	1	1	1
OGN	0.018793	-2.44822	1	0.972	1
SPRR2G	0.0294065	-3.41587	1	0.999	1
CLDN4	0.106247	-1.5303	1	1	1
COL17A1	0.229129	-1.4076	1	1	1
TMPRSS11E	0.667228	-2.03247	1	0.997	1

## Sheet: B1 - cluster 4
	p_val	avg_log2FC	pct.1	pct.2	p_val_adj
EPPK1	2.02343e-136	1.80918	1	1	3.63064e-132
IGFBP2	1.88616e-130	1.58192	1	1	3.38434e-126
GLUL	2.50105e-123	-4.13974	1	1	4.48763e-119
ALDH3A1	4.86924e-115	1.75946	1	0.999	8.73688e-111
SPRR2F	1.48455e-112	-4.84836	0.979	0.986	2.66373e-108
IGFBP3	3.75487e-109	1.45106	1	1	6.73737e-105
RHCG	4.75446e-106	-4.44933	1	1	8.53093e-102
OLFML2B	8.2145e-105	-2.17052	1	1	1.47393e-100
IGLC1	1.85925e-104	-5.47181	0.997	0.996	3.33605e-100
EGR1	3.09354e-101	-3.70915	1	1	5.55074e-97
LAD1	1.92072e-100	1.23805	1	0.997	3.44635e-96
CLDN4	2.84906e-99	-2.92202	1	1	5.11206e-95
PHLDA1	1.51075e-97	-2.43504	1	1	2.71073e-93
VCAN	3.99749e-96	-1.67416	1	1	7.17269e-92
IGKC	6.93313e-96	-7.90928	1	1	1.24401e-91
COL17A1	8.80385e-93	1.6886	1	1	1.57968e-88
SPNS2	1.6958e-91	-2.61008	1	1	3.04277e-87
C11orf96	6.9916e-91	-2.81388	0.84	0.904	1.2545e-86
IGHG1	7.33544e-91	-7.3248	1	1	1.3162e-86
FDCSP	3.47321e-90	-5.9018	1	1	6.23198e-86
CRTAC1	1.56702e-88	-2.88238	1	0.99	2.8117e-84
KRT13	2.00408e-87	-5.00691	1	1	3.59593e-83
POSTN	4.24336e-86	-5.95262	1	0.995	7.61386e-82
S100A14	1.4698e-84	1.18987	1	1	2.63726e-80
DSG1	1.0299e-80	1.42145	1	1	1.84795e-76
DST	1.74524e-80	0.920273	1	0.997	3.13148e-76
CRISPLD2	5.37764e-78	-3.00477	1	0.996	9.64909e-74
SPRR3	2.36807e-77	-4.72366	1	1	4.24903e-73
IGHA1	1.90639e-76	-6.12756	1	0.999	3.42063e-72
LCN2	2.60089e-76	-3.46093	1	1	4.66677e-72
JCHAIN	1.51045e-74	-4.97596	0.986	0.979	2.71021e-70
TMPRSS11E	8.86449e-74	-2.79345	0.993	0.998	1.59055e-69
FN1	2.83401e-73	-4.60096	1	0.994	5.08506e-69
KRT1	4.23804e-71	1.37226	1	1	7.60432e-67
SELE	1.49107e-70	-1.77135	1	0.995	2.67543e-66
IGHG2	3.86829e-70	-6.72308	1	0.999	6.94087e-66
MFAP4	2.14923e-69	-2.35355	1	1	3.85636e-65
RARRES2	1.81452e-67	-2.186	1	1	3.2558e-63
DSC2	7.35192e-67	0.956049	1	1	1.31916e-62
IGHG4	1.79257e-64	-5.5292	0.993	0.996	3.21641e-60
CCN2	4.58153e-63	-3.99137	1	0.999	8.22065e-59
CTNNBIP1	6.13757e-62	1.12838	1	1	1.10126e-57
FOSB	9.84009e-61	-3.88073	1	1	1.76561e-56
CNFN	1.48508e-60	-4.7608	1	1	2.66467e-56
PI3	4.64473e-60	-3.16911	1	1	8.33404e-56
S100A7	5.3161e-59	-4.05029	1	0.998	9.53867e-55
CFH	7.7548e-59	-2.42158	1	1	1.39144e-54
TM4SF1	1.33193e-58	-2.50078	1	0.995	2.38988e-54
MXRA8	1.55801e-58	-3.46437	1	0.997	2.79554e-54
TIMP2	1.40803e-56	-4.3592	1	0.994	2.52643e-52
LRRC15	2.98542e-56	-3.29045	1	0.993	5.35674e-52
SOD2	1.4474e-55	-2.96766	1	1	2.59707e-51
CXCL12	2.36934e-55	-4.53796	1	1	4.25131e-51
SPRR2D	5.71555e-55	-4.32521	1	0.997	1.02554e-50
COL1A1	1.07416e-54	-7.79155	1	1	1.92737e-50
ODAPH	1.36736e-54	-1.557	1	1	2.45345e-50
CRCT1	1.09284e-52	-5.25326	0.976	0.985	1.96088e-48
AEBP1	3.71379e-52	-5.50296	1	0.998	6.66366e-48
RASD1	7.96814e-52	-2.15397	1	0.995	1.42972e-47
OGN	3.25266e-51	-2.94631	0.993	0.972	5.83624e-47
PCOLCE	1.42369e-49	-3.63684	1	0.99	2.55452e-45
LGALS1	1.28362e-48	-2.60204	1	1	2.30321e-44
NFATC4	2.41514e-48	-2.42271	1	0.999	4.33349e-44
KRT4	2.47691e-48	-2.20342	1	0.989	4.44432e-44
PTGDS	7.95722e-48	-1.91614	1	0.995	1.42776e-43
IL36G	2.55509e-47	-3.2165	1	0.975	4.5846e-43
COL3A1	7.41566e-46	-6.63762	1	1	1.33059e-41
COL1A2	2.47386e-43	-6.72501	1	1	4.43884e-39
CRNN	6.31489e-43	-4.73633	1	1	1.13308e-38
IGKV4-1	3.6775e-42	-2.69939	0.99	0.978	6.59854e-38
TMPRSS11B	5.01703e-42	-2.8086	1	1	9.00206e-38
KLK5	9.69194e-42	-0.540392	1	1	1.73902e-37
FSTL1	3.00041e-41	-3.44588	1	0.999	5.38364e-37
CLDN5	4.93888e-41	-2.44569	0.986	0.946	8.86183e-37
EVPL	6.60595e-41	0.74905	1	1	1.1853e-36
CXCL14	6.74433e-40	0.450999	1	1	1.21014e-35
IGFBP5	8.43485e-40	-3.80166	1	1	1.51346e-35
CFD	3.0281e-39	-3.04669	1	0.988	5.43332e-35
POF1B	5.75643e-39	-1.20556	1	1	1.03288e-34
CLU	1.4973e-38	-2.10109	1	1	2.6866e-34
LUM	9.1042e-38	-5.54866	1	1	1.63357e-33
S100A2	1.25602e-37	0.394663	1	1	2.25367e-33
CALML5	1.95568e-37	-2.07148	1	0.982	3.50908e-33
SERPINF1	2.24699e-37	-3.74849	1	1	4.03178e-33
CD74	4.51411e-37	-2.47729	1	1	8.09967e-33
DCN	5.73666e-37	-4.07537	1	1	1.02933e-32
FMOD	1.2014e-36	-3.60179	1	1	2.15567e-32
PDGFRA	1.53121e-36	-1.92098	1	0.994	2.74744e-32
COL4A2	2.03137e-36	-2.01349	1	0.998	3.64488e-32
MAL	2.61209e-36	-4.02	1	0.99	4.68687e-32
THBS2	3.89404e-36	-3.82408	1	0.991	6.98708e-32
KCTD12	5.72304e-36	-1.91599	1	1	1.02688e-31
DKK3	1.65867e-35	-2.6115	1	1	2.97615e-31
KRT24	1.80616e-35	-1.0481	1	1	3.24079e-31
FBLN2	1.89938e-35	-2.56939	0.997	0.947	3.40806e-31
SLIT3	3.18591e-35	-2.02416	1	0.995	5.71648e-31
SOCS3	3.92684e-35	-2.39948	1	0.998	7.04593e-31
HSPG2	5.77561e-35	-2.06646	1	1	1.03632e-30
NR4A1	7.43531e-35	-2.75143	1	1	1.33412e-30
VIM	3.48532e-34	-4.87657	1	0.999	6.25371e-30
S100A4	3.53305e-34	-2.4446	1	1	6.33935e-30
FGFR1	4.6491e-34	-2.35717	1	1	8.34188e-30
PRRX1	5.64774e-34	-3.00273	1	0.996	1.01337e-29
FBN1	9.62412e-34	-3.26457	0.993	1	1.72686e-29
THY1	1.23449e-33	-2.51386	1	0.986	2.21504e-29
MMP2	1.58358e-33	-5.74483	1	0.998	2.84142e-29
HIST1H1B	2.23787e-33	0.455174	1	0.999	4.01542e-29
CTSK	3.08879e-33	-3.56483	1	1	5.54221e-29
KRT10	3.8597e-33	-1.11901	1	1	6.92546e-29
BGN	3.95911e-33	-3.5962	1	1	7.10384e-29
KLK12	4.4093e-33	-2.83773	1	1	7.9116e-29
COL14A1	4.36073e-32	-2.22157	1	1	7.82445e-28
RGS3	5.85291e-32	-1.61412	1	1	1.05019e-27
C1S	1.88377e-31	-3.9335	1	0.988	3.38005e-27
IGFBP4	2.05577e-31	-4.26555	1	1	3.68866e-27
TAGLN	5.15534e-31	-3.66755	1	0.987	9.25023e-27
SPARC	6.15893e-31	-5.63333	1	1	1.1051e-26
GJB6	8.28962e-31	-0.801137	1	1	1.48741e-26
GLTP	1.07583e-30	-0.3218	1	1	1.93037e-26
APOD	1.56987e-30	-2.82803	1	0.99	2.81682e-26
C1R	7.21252e-30	-3.76922	1	0.995	1.29414e-25
SOD3	1.71853e-29	-3.95675	1	0.995	3.08357e-25
IFITM2	2.35904e-29	-2.30435	1	0.999	4.23283e-25
COL12A1	5.05064e-29	-4.54091	1	1	9.06236e-25
ASPN	6.87348e-29	-4.46799	0.962	0.949	1.23331e-24
SBSN	7.82358e-29	-0.453616	1	1	1.40378e-24
PDGFRB	1.11574e-28	-2.19716	1	1	2.00197e-24
SERPING1	2.25437e-28	-2.04863	1	1	4.04502e-24
COL6A2	3.12568e-28	-4.35568	1	1	5.6084e-24
IFITM3	6.3432e-28	-1.84495	1	1	1.13816e-23
FBLN1	9.08183e-28	-3.51095	1	1	1.62955e-23
CCN1	1.03255e-27	-3.0887	1	0.991	1.85271e-23
HOPX	2.58975e-27	-1.11173	1	1	4.64679e-23
TNS4	1.05152e-26	0.319849	1	0.981	1.88674e-22
SPINK7	1.29418e-26	-4.46365	1	1	2.32215e-22
COL6A3	1.99857e-26	-3.66735	1	1	3.58604e-22
PLPP3	3.70682e-26	-2.01932	1	0.985	6.65115e-22
LAMA4	6.52163e-26	-1.88352	1	1	1.17018e-21
PPL	5.62452e-25	-1.23572	1	1	1.00921e-20
ALOX12B	7.79937e-25	-1.67136	1	1	1.39944e-20
KLK6	8.13465e-25	-2.73022	1	1	1.4596e-20
TMPRSS11D	2.12157e-24	-0.327489	1	1	3.80673e-20
COL4A1	3.18299e-24	-1.88245	1	0.967	5.71124e-20
SPRR2G	5.16572e-24	-5.49858	1	0.999	9.26885e-20
IGFBP7	1.19188e-23	-4.28549	1	0.994	2.13859e-19
SFRP4	2.10851e-23	-5.19693	0.965	0.863	3.7833e-19
COL6A1	3.54266e-23	-4.08965	1	0.99	6.35659e-19
ATF3	9.62439e-23	-1.50102	1	0.999	1.7269e-18
COL5A1	9.78275e-23	-2.85889	1	0.998	1.75532e-18
KLK7	2.13778e-22	-1.60007	1	1	3.83582e-18
COL5A2	4.21091e-22	-2.71684	1	1	7.55564e-18
LCE3E	7.3611e-22	-2.82503	1	1	1.3208e-17
MYL9	8.22706e-22	-3.31132	1	1	1.47618e-17
TPM1	1.53445e-21	-1.83082	1	1	2.75327e-17
SPARCL1	7.22897e-21	-2.67378	1	0.995	1.29709e-16
HTRA1	1.64196e-20	-2.79365	1	1	2.94617e-16
A2M	2.70888e-20	-3.62014	1	0.947	4.86055e-16
HSPB8	3.56957e-20	-0.953148	1	1	6.40488e-16
ACTA2	6.09681e-17	-3.44997	1	0.979	1.09395e-12
PPIF	2.06875e-16	-2.78393	1	0.995	3.71196e-12
MT2A	2.24837e-16	-0.973386	1	1	4.03425e-12
DMKN	6.21587e-16	-1.1853	1	1	1.11531e-11
TGM3	9.97613e-16	-2.1217	1	1	1.79002e-11
AQP1	8.40474e-15	-2.47983	1	1	1.50806e-10
TIMP3	2.2874e-14	-3.15898	1	0.964	4.10427e-10
PRSS27	1.92869e-13	-2.88469	1	0.998	3.46064e-09
SPRR1B	3.45002e-11	-0.562129	1	1	6.19037e-07
KRT15	1.55671e-10	-0.615404	1	1	2.79321e-06
SERPINB13	2.35079e-10	-0.928596	1	1	4.21802e-06
SLURP2	3.98838e-09	-2.44619	1	0.998	7.15635e-05
KLK10	4.03616e-09	-2.29134	1	0.998	7.24208e-05
CD24	5.19884e-09	-0.500476	1	1	9.32829e-05
RGS5	1.83068e-07	-1.79269	1	0.997	0.00328479
SLURP1	8.80846e-07	-2.8641	1	1	0.015805
SPINK5	2.28393e-06	-1.90849	1	1	0.0409806
GJB2	6.67958e-06	-0.904846	1	1	0.119852
IL36RN	1.01949e-05	-2.78499	1	1	0.182926
LOR	2.35063e-05	-5.42571	0.997	0.985	0.421773
GPX3	0.000157433	-1.94248	1	1	1
CDSN	0.000158149	-4.59223	1	1	1
NR4A2	0.000250249	-0.962354	1	0.998	1
CLIC3	0.000273482	-1.98418	1	1	1
LCE3D	0.000373992	-5.25147	1	0.995	1
KRT80	0.000449923	-3.18821	1	1	1
SAT1	0.000546655	-0.746166	1	0.997	1
NCCRP1	0.0011799	-2.67633	1	1	1
TACSTD2	0.0188852	-1.29868	1	1	1
SCEL	0.0828494	-1.33628	1	1	1
MT1X	0.292093	-0.406885	1	1	1
LYPD5	0.292661	-2.79877	1	1	1
RPTN	0.373728	-5.39429	1	0.99	1
KRT78	0.441883	-3.90717	1	0.999	1
KLK13	0.664537	-2.76282	1	1	1
TGM1	0.75523	-1.99949	1	0.989	1

## Sheet: B1 - cluster 5
	p_val	avg_log2FC	pct.1	pct.2	p_val_adj
DST	7.79437e-172	3.11743	1	0.997	1.39854e-167
COL17A1	7.33567e-169	2.66869	1	1	1.31624e-164
KRT15	1.21346e-168	3.49434	1	1	2.17731e-164
TNS4	5.67874e-154	2.04688	1	0.981	1.01894e-149
CXCL14	4.99893e-147	2.0881	1	1	8.96958e-143
MT1X	5.20021e-139	1.74439	1	1	9.33073e-135
CLDN4	7.39767e-139	-2.87297	1	1	1.32736e-134
HIST1H1B	5.9277e-131	1.52051	1	0.999	1.06361e-126
ALDH3A1	9.35834e-130	1.73779	1	0.999	1.67917e-125
IGFBP2	6.19727e-116	1.48668	1	1	1.11198e-111
RHCG	3.50379e-99	-4.2666	1	1	6.28685e-95
LAMB3	8.91541e-97	1.10174	1	0.989	1.59969e-92
S100A2	3.27684e-90	1.21196	1	1	5.87964e-86
S100A7	1.06935e-89	-4.40591	1	0.998	1.91873e-85
OGN	2.48668e-89	-2.96446	0.987	0.972	4.46185e-85
TGM1	2.38583e-78	-3.2067	0.997	0.989	4.2809e-74
MAL	5.45554e-77	-4.15575	0.997	0.99	9.78888e-73
LCN2	1.63686e-75	-3.35913	1	1	2.93702e-71
NR4A2	7.01892e-75	1.05309	1	0.998	1.25941e-70
SPRR3	6.2995e-69	-4.49925	1	1	1.13032e-64
SPRR2D	1.60708e-67	-4.35977	1	0.997	2.88359e-63
EPPK1	1.13146e-65	1.00816	1	1	2.03017e-61
SPNS2	1.42666e-65	-2.56634	1	1	2.55986e-61
SLURP2	4.23669e-64	-2.93869	1	0.998	7.60189e-60
SFRP4	1.96595e-60	-5.22991	0.744	0.894	3.52751e-56
GPX3	9.1424e-60	-2.76103	1	1	1.64042e-55
IL36G	1.35672e-58	-3.23637	0.994	0.976	2.43436e-54
MT2A	3.06137e-58	0.833983	1	1	5.49301e-54
SCEL	1.76461e-56	-2.40237	1	1	3.16625e-52
SAT1	7.66721e-56	0.635919	1	0.997	1.37573e-51
TMPRSS11E	9.4061e-51	-2.73041	0.991	0.998	1.68774e-46
IGFBP3	4.69461e-50	0.547152	1	1	8.42354e-46
SLPI	7.29708e-50	-2.1369	1	1	1.30931e-45
CRNN	6.81113e-49	-4.75936	1	1	1.22212e-44
TMPRSS11B	7.21033e-49	-2.81883	1	1	1.29375e-44
CNFN	2.92765e-45	-4.56203	1	1	5.25309e-41
IGHA1	5.11172e-45	-5.25113	0.997	0.999	9.17195e-41
KLK13	5.52098e-42	-3.40667	1	1	9.9063e-38
KRT4	2.32987e-41	-1.94695	1	0.988	4.18049e-37
KRT13	5.20826e-41	-3.88276	1	1	9.34518e-37
TACSTD2	1.17735e-40	-1.77541	1	1	2.11252e-36
ODAPH	3.43718e-40	-1.49327	1	1	6.16733e-36
GLUL	1.37132e-38	-2.59544	1	1	2.46056e-34
SPRR1B	1.31062e-37	-1.78354	1	1	2.35164e-33
CRTAC1	1.03138e-35	-2.79523	0.997	0.99	1.8506e-31
ASPN	2.65207e-34	-4.4277	0.921	0.954	4.7586e-30
CLIC3	3.16711e-34	-2.76018	1	1	5.68275e-30
CDSN	1.84061e-33	-4.76075	1	1	3.30261e-29
SPRR2F	3.34448e-33	-4.22315	0.997	0.984	6.001e-29
ATF3	5.69068e-33	0.493141	1	0.999	1.02108e-28
KLK6	6.51439e-33	-2.7446	1	1	1.16888e-28
JCHAIN	5.2061e-30	-4.40663	0.962	0.982	9.34131e-26
KLK12	5.87286e-30	-2.96092	1	1	1.05377e-25
NCCRP1	2.29421e-29	-3.12742	1	1	4.1165e-25
FDCSP	2.0311e-28	-4.68828	1	1	3.64441e-24
IGKC	2.16824e-27	-5.17656	1	1	3.89047e-23
C11orf96	3.90772e-27	-2.52206	0.991	0.883	7.01163e-23
KRT80	4.07329e-27	-3.60504	1	1	7.3087e-23
DMKN	5.26053e-26	-2.25464	1	1	9.43897e-22
SPINK7	7.98478e-25	-4.46025	1	1	1.43271e-20
NR4A1	2.10008e-24	0.339926	1	1	3.76818e-20
IGHG2	3.49704e-24	-4.45422	1	0.999	6.27474e-20
IGKV4-1	3.76391e-24	-2.58391	0.981	0.979	6.75359e-20
IGHG1	4.60544e-23	-5.20394	1	1	8.26354e-19
LAD1	2.70111e-22	0.376865	1	0.997	4.84661e-18
IGHG4	3.70515e-22	-4.43309	1	0.995	6.64815e-18
PRSS27	4.22325e-22	-2.87406	1	0.998	7.57778e-18
OLFML2B	1.35191e-21	-1.96878	1	1	2.42574e-17
SBSN	2.68843e-21	-2.36903	1	1	4.82386e-17
GJB6	1.07307e-18	-2.04479	1	1	1.92541e-14
IGLC1	1.04379e-17	-4.47383	1	0.995	1.87288e-13
S100A14	4.80631e-17	0.329608	1	1	8.62396e-13
KLK10	7.10183e-16	-3.21464	1	0.998	1.27428e-11
CRCT1	3.72284e-15	-4.62375	0.994	0.983	6.67989e-11
TGM3	7.97123e-13	-3.69709	1	1	1.43028e-08
PPIF	1.0183e-12	-2.74103	1	0.995	1.82714e-08
POSTN	3.41294e-12	-5.50651	1	0.995	6.12384e-08
DSG1	3.9467e-12	-0.486143	1	1	7.08156e-08
SOD2	2.55911e-11	-1.88407	1	1	4.59181e-07
GJB2	2.64055e-11	-1.74674	1	1	4.73795e-07
PI3	4.1445e-11	-2.90772	1	1	7.43647e-07
RGS3	2.1306e-10	-1.44029	1	1	3.82293e-06
KLK7	3.14097e-10	-2.86097	1	1	5.63584e-06
SPRR2G	3.34005e-10	-5.1899	1	0.999	5.99305e-06
HOPX	1.23804e-09	-1.36933	1	1	2.22142e-05
EGR1	1.4936e-09	-1.34384	1	1	2.67997e-05
KRTDAP	3.22711e-09	-3.0964	1	0.998	5.7904e-05
KRT3	7.94169e-09	-1.79319	1	0.992	0.000142498
CD24	4.59449e-07	-1.62302	1	1	0.00824389
SELE	4.73933e-07	-1.42127	1	0.995	0.00850378
POF1B	8.64725e-07	-1.84154	1	1	0.0155158
IVL	1.89609e-06	-2.18719	1	1	0.0340215
SERPINB13	2.10714e-06	-1.93497	1	1	0.0378083
CLU	3.37231e-06	-0.872043	1	1	0.0605093
KRT78	3.48079e-06	-4.20393	1	0.999	0.0624558
COL1A1	4.16919e-06	-4.86153	1	1	0.0748078
TAGLN	5.7502e-06	-2.48765	1	0.987	0.103176
RASD1	7.47343e-06	-1.72462	0.997	0.996	0.134096
PHLDA1	7.5223e-06	-0.814803	1	1	0.134973
HSPB8	1.46038e-05	-1.93428	1	1	0.262037
TIMP2	2.10536e-05	-3.25304	1	0.994	0.377765
RGS5	3.14661e-05	-1.68625	1	0.997	0.564597
APOD	8.27806e-05	-1.71968	1	0.99	1
LYPD5	8.41986e-05	-2.85403	1	1	1
COL4A1	8.58831e-05	-1.33279	1	0.967	1
MXRA8	0.000102704	-2.81118	1	0.997	1
SLURP1	0.000133911	-3.22598	1	1	1
COL12A1	0.000245911	-3.71718	1	1	1
CALML5	0.000294982	-2.93541	1	0.982	1
CD74	0.000398126	-1.07698	1	1	1
DKK3	0.000478641	-1.30987	1	1	1
RARRES2	0.000479029	-1.65833	1	1	1
CLDN5	0.000518747	-2.07327	0.997	0.944	1
LRRC15	0.000682325	-2.89657	1	0.993	1
COL3A1	0.00167715	-3.71489	1	1	1
PPL	0.00186505	-1.7364	1	1	1
CFH	0.00324259	-0.840952	1	1	1
SPARC	0.00336571	-4.13359	1	1	1
TPM1	0.00420117	-1.48583	1	1	1
DSC2	0.00580513	-0.692172	1	1	1
CRISPLD2	0.005814	-2.29518	1	0.996	1
MMP2	0.00996394	-4.08906	1	0.998	1
CCN1	0.0115113	-0.682193	1	0.991	1
SPARCL1	0.0139162	-2.16945	0.997	0.995	1
SERPING1	0.0147126	-1.62284	1	1	1
KLK5	0.0157832	-1.78628	1	1	1
KRT1	0.018044	-1.46192	1	1	1
KRT24	0.0268673	-2.30383	1	1	1
C1R	0.0269888	-1.38342	1	0.994	1
COL1A2	0.0318343	-4.17912	1	1	1
TM4SF1	0.0335906	-1.51518	1	0.995	1
MFAP4	0.0350967	-1.6302	1	1	1
IL36RN	0.0376143	-3.02534	1	1	1
FOSB	0.0402765	-2.04363	1	1	1
LCE3D	0.0409159	-4.89006	0.997	0.996	1
IGFBP4	0.0451207	-2.35315	1	1	1
LGALS1	0.0471508	-1.88884	1	1	1
VIM	0.0581174	-2.7713	1	0.999	1
VCAN	0.0596194	-1.20007	1	1	1
COL6A3	0.0637395	-2.46594	1	1	1
FN1	0.0683444	-2.82523	1	0.994	1
KRT76	0.0744567	-2.15089	1	1	1
ALOX12B	0.0798194	-2.36196	1	1	1
CTSK	0.0798488	-2.73131	1	1	1
CXCL12	0.0800316	-2.92033	1	1	1
CCN2	0.0902915	-1.72088	1	0.999	1
LAMA4	0.0974525	-1.16621	1	1	1
PDGFRB	0.114141	-1.71811	1	1	1
PLPP3	0.133231	-0.980679	1	0.984	1
IGFBP5	0.142291	-0.978217	1	1	1
TIMP3	0.147727	-2.82925	1	0.963	1
COL4A2	0.14814	-1.35285	1	0.998	1
BGN	0.190621	-2.82845	1	1	1
PDGFRA	0.195175	-1.30791	1	0.994	1
FBN1	0.200662	-1.84448	1	0.999	1
SOCS3	0.203594	-0.804146	1	0.998	1
GLTP	0.205297	-1.56578	1	1	1
THBS2	0.209575	-2.33969	1	0.991	1
FBLN1	0.214175	-2.362	1	1	1
TMPRSS11D	0.244102	-1.18372	1	1	1
PCOLCE	0.244798	-2.56304	1	0.99	1
AEBP1	0.314282	-3.23869	1	0.998	1
HTRA1	0.314522	-2.13019	1	1	1
PTGDS	0.336937	-1.50992	1	0.995	1
IGFBP7	0.347709	-2.50281	1	0.994	1
KCTD12	0.353004	-0.992764	1	1	1
RPTN	0.357957	-5.31644	1	0.99	1
LOR	0.366548	-5.23447	1	0.984	1
LUM	0.373737	-3.28265	1	1	1
COL5A1	0.384633	-2.21275	1	0.998	1
HSPG2	0.386071	-1.13639	1	1	1
KRT10	0.388836	-2.67615	1	1	1
PRRX1	0.405143	-1.70235	1	0.996	1
THY1	0.40635	-1.59717	1	0.986	1
SPINK5	0.409849	-2.36012	1	1	1
FSTL1	0.426436	-2.01872	1	0.999	1
COL5A2	0.465164	-2.19505	1	1	1
SLIT3	0.477388	-1.44067	1	0.994	1
NFATC4	0.508756	-1.78082	1	0.999	1
FMOD	0.551629	-2.27897	1	1	1
MYL9	0.559739	-2.203	1	1	1
SERPINF1	0.593298	-2.15879	1	1	1
A2M	0.595032	-2.42411	0.994	0.947	1
LCE3E	0.615522	-2.68444	1	1	1
FBLN2	0.665288	-1.25626	1	0.946	1
FGFR1	0.751878	-1.83269	1	1	1
ACTA2	0.765375	-2.62639	1	0.979	1
S100A4	0.769779	-1.20744	1	1	1
COL6A1	0.8282	-1.85206	1	0.99	1
CFD	0.833611	-1.84769	1	0.988	1
AQP1	0.931723	-1.3801	1	1	1
C1S	0.93894	-2.25362	1	0.988	1
DCN	0.944063	-1.20199	1	1	1
COL6A2	0.965947	-1.99426	1	1	1
SOD3	0.966147	-2.47383	1	0.995	1
COL14A1	0.99933	-1.61871	1	1	1

## Sheet: B1 - cluster 6
	p_val	avg_log2FC	pct.1	pct.2	p_val_adj
IGHA1	5.26043e-157	4.2124	1	0.999	9.43879e-153
IGKV4-1	1.61985e-154	3.6506	1	0.977	2.90649e-150
JCHAIN	3.24084e-147	4.07215	1	0.977	5.81504e-143
IGKC	5.20242e-147	5.06714	1	1	9.33471e-143
IGHG2	7.49384e-146	4.74407	1	0.999	1.34462e-141
IGHG1	2.32337e-141	4.56208	1	1	4.16882e-137
IGHG4	1.62151e-139	5.12713	1	0.995	2.90948e-135
IGLC1	1.07207e-133	3.6919	1	0.995	1.92361e-129
CD74	1.5336e-103	1.40104	1	1	2.75174e-99
SOCS3	3.09705e-101	1.62432	1	0.998	5.55704e-97
SELE	2.96603e-93	1.34979	1	0.995	5.32196e-89
FDCSP	1.87925e-80	0.438388	1	1	3.37195e-76
CLDN5	4.45611e-77	0.365161	1	0.944	7.9956e-73
MXRA8	1.30353e-73	0.446212	1	0.997	2.33892e-69
C11orf96	2.41815e-70	0.400961	1	0.882	4.33889e-66
PTGDS	8.74305e-68	0.799654	1	0.995	1.56877e-63
CXCL12	1.89472e-64	1.23799	1	1	3.39969e-60
COL4A1	7.02557e-64	0.80714	1	0.967	1.2606e-59
POSTN	8.52481e-64	-1.17578	0.997	0.996	1.52961e-59
FOSB	4.92855e-63	0.872672	1	1	8.8433e-59
CCN2	1.92747e-60	1.12924	1	0.999	3.45846e-56
ASPN	4.01977e-60	-1.05888	0.987	0.945	7.21267e-56
PHLDA1	2.88599e-59	0.691775	1	1	5.17833e-55
RGS3	3.1342e-58	0.29648	1	1	5.6237e-54
COL3A1	3.83721e-58	0.81072	1	1	6.8851e-54
RASD1	3.39492e-55	0.329753	0.994	0.996	6.0915e-51
CRISPLD2	3.53545e-55	0.369964	1	0.996	6.34366e-51
ACTA2	4.28131e-55	-0.804684	1	0.979	7.68196e-51
CTNNBIP1	3.07053e-54	-2.25239	1	1	5.50946e-50
LAMA4	5.63151e-54	0.575499	1	1	1.01046e-49
ODAPH	2.1019e-53	-0.325333	1	1	3.77143e-49
VCAN	2.85902e-53	0.795766	1	1	5.12995e-49
MMP2	3.40229e-53	-0.338621	1	0.998	6.10473e-49
IGFBP5	8.95809e-53	1.00486	1	1	1.60735e-48
LRRC15	1.74655e-52	-0.618911	1	0.993	3.13384e-48
A2M	3.11418e-50	-0.583762	1	0.946	5.58777e-46
KLK6	4.2144e-50	-1.1895	1	1	7.56189e-46
FBLN2	5.3525e-50	0.773199	0.997	0.947	9.60399e-46
PDGFRB	1.22377e-49	0.722772	1	1	2.19582e-45
COL4A2	2.80676e-49	0.331578	1	0.998	5.03617e-45
COL6A3	1.67526e-48	0.384726	1	1	3.00592e-44
OGN	2.14956e-48	-1.56397	1	0.971	3.85695e-44
COL12A1	4.79096e-48	-0.294585	1	1	8.59643e-44
SPARCL1	5.70572e-48	-0.83159	0.987	0.997	1.02378e-43
TAGLN	1.03857e-47	-1.07407	1	0.987	1.86351e-43
EPPK1	1.64985e-46	-2.16697	1	1	2.96033e-42
LCN2	1.71344e-46	-1.19108	1	1	3.07442e-42
DSC2	8.50623e-46	-2.31172	1	1	1.52627e-41
LUM	3.87446e-45	-0.361907	1	1	6.95194e-41
EGR1	4.56547e-45	0.935793	1	1	8.19182e-41
CRTAC1	5.1792e-45	-1.15625	0.99	0.991	9.29304e-41
ATF3	4.85618e-44	0.746794	1	0.999	8.71344e-40
FBN1	1.61475e-43	0.674699	1	0.999	2.89735e-39
POF1B	5.68477e-41	-2.74684	1	1	1.02002e-36
HOPX	1.11019e-40	-2.63171	1	1	1.99202e-36
SPNS2	2.16106e-40	-1.22987	1	1	3.87759e-36
HSPG2	3.33233e-40	0.462794	1	1	5.9792e-36
CRCT1	6.06188e-40	-1.66636	0.994	0.983	1.08768e-35
SOD2	5.01988e-39	0.856473	1	1	9.00717e-35
IFITM2	8.42902e-39	0.460744	1	0.999	1.51242e-34
SFRP4	2.27142e-38	-1.64851	0.942	0.866	4.07562e-34
EVPL	4.51843e-38	-1.77616	1	1	8.10742e-34
LAD1	5.37714e-38	-1.71709	0.997	0.997	9.6482e-34
THBS2	1.1377e-37	-0.279794	1	0.991	2.04138e-33
RARRES2	1.37536e-36	0.330903	1	1	2.46782e-32
VIM	3.12421e-36	0.565279	1	0.999	5.60577e-32
SERPING1	3.96335e-35	0.514186	1	1	7.11144e-31
KCTD12	1.29975e-34	0.455604	1	1	2.33214e-30
PRRX1	1.37016e-34	0.292709	1	0.996	2.45847e-30
IGFBP4	6.38955e-34	0.710789	1	1	1.14648e-29
FGFR1	8.41226e-34	-0.530741	1	1	1.50941e-29
COL6A1	2.31032e-33	0.362699	1	0.99	4.1454e-29
CLDN4	5.37964e-33	-0.294223	1	1	9.65268e-29
IVL	1.29056e-31	-2.5691	1	1	2.31565e-27
GLTP	2.47622e-31	-1.95781	1	1	4.44308e-27
KRT24	6.02093e-31	-2.57283	1	1	1.08034e-26
SPRR2F	1.46035e-30	-1.58837	0.997	0.984	2.6203e-26
AEBP1	1.50118e-30	-0.385813	1	0.998	2.69356e-26
APOD	3.29564e-30	-1.13057	0.997	0.99	5.91337e-26
MYL9	3.54319e-30	-0.774113	1	1	6.35754e-26
S100A7	8.47151e-30	-1.7105	1	0.998	1.52004e-25
DSG1	8.54475e-30	-2.7869	1	1	1.53318e-25
CNFN	1.40254e-29	-2.32618	1	1	2.51658e-25
BGN	4.51153e-29	-0.57697	1	1	8.09503e-25
GLUL	1.43765e-28	-0.46816	1	1	2.57957e-24
CFD	8.09675e-28	-0.360048	1	0.988	1.4528e-23
S100A14	9.01507e-28	-1.34486	1	1	1.61757e-23
MAL	3.37871e-27	-1.41106	0.994	0.991	6.06243e-23
HSPB8	1.92656e-26	-2.05894	1	1	3.45683e-22
CCN1	2.70355e-26	0.559992	1	0.991	4.85099e-22
SPRR3	5.17096e-26	-1.87666	1	1	9.27825e-22
SERPINF1	1.41257e-25	-0.577452	1	1	2.53458e-21
MT2A	5.41135e-25	0.586706	1	1	9.70958e-21
TMPRSS11D	6.96983e-25	-2.01075	1	1	1.2506e-20
SOD3	2.82262e-23	-0.753119	0.997	0.996	5.06462e-19
NR4A1	6.7777e-22	0.326508	1	1	1.21612e-17
KRT1	3.25583e-21	-2.83513	1	1	5.84194e-17
LAMB3	6.01799e-21	0.338362	0.997	0.99	1.07981e-16
ALOX12B	9.26559e-21	-2.37053	1	1	1.66252e-16
C1S	1.06139e-20	-0.329024	1	0.988	1.90445e-16
THY1	2.44818e-20	-0.282369	1	0.986	4.39276e-16
PRSS27	2.46666e-20	-1.33364	0.994	0.999	4.42593e-16
TMPRSS11E	4.2328e-20	-1.7064	1	0.997	7.59491e-16
TMPRSS11B	2.37178e-19	-2.05571	1	1	4.25568e-15
IGFBP2	3.52771e-18	-1.47046	1	1	6.32977e-14
RHCG	2.2168e-17	-1.22205	1	1	3.97761e-13
SPRR2G	2.30395e-17	-4.23787	1	0.999	4.13397e-13
CALML5	7.19221e-17	-3.34543	0.981	0.985	1.2905e-12
DST	7.31703e-17	-2.22393	1	0.997	1.31289e-12
IL36G	1.02499e-16	-1.23655	0.997	0.975	1.83914e-12
SPRR2D	8.13754e-16	-2.21347	1	0.997	1.46012e-11
KLK5	1.80817e-15	-2.19723	1	1	3.2444e-11
PLPP3	2.11713e-15	-0.322845	0.997	0.985	3.79877e-11
DKK3	3.86188e-15	-0.523825	1	1	6.92936e-11
IGFBP3	4.94947e-15	-1.25631	1	1	8.88083e-11
SLIT3	1.0398e-14	-0.762508	0.994	0.995	1.86571e-10
SPINK7	3.07628e-14	-3.31926	1	1	5.51977e-10
CD24	7.82194e-14	-1.61478	1	1	1.40349e-09
IFITM3	1.11078e-13	0.364952	1	1	1.99307e-09
PPL	1.87821e-13	-1.88956	1	1	3.37007e-09
CXCL14	3.69203e-13	-1.61533	1	1	6.62461e-09
SLURP2	3.84092e-12	-1.64567	1	0.998	6.89177e-08
ALDH3A1	6.25331e-12	-1.643	1	0.999	1.12203e-07
SERPINB13	2.8518e-10	-1.96307	1	1	5.11698e-06
KRT76	3.26802e-10	-2.80453	1	1	5.86381e-06
CRNN	1.12386e-09	-3.21676	1	1	2.01653e-05
GJB6	7.62092e-09	-1.97236	1	1	0.000136742
HIST1H1B	3.76976e-08	-0.25835	1	0.999	0.000676409
SLURP1	4.16566e-08	-2.91737	1	1	0.000747444
LYPD5	8.33221e-08	-2.45206	1	1	0.00149505
LCE3E	2.23828e-07	-2.31099	1	1	0.00401614
CLIC3	1.3338e-06	-2.46021	1	1	0.0239324
KRTDAP	3.32921e-06	-3.06094	1	0.998	0.059736
CDSN	2.65196e-05	-4.49626	1	1	0.475841
COL17A1	2.65409e-05	-2.07971	1	1	0.476223
KRT10	9.51974e-05	-2.88898	1	1	1
KRT15	0.000289434	-1.31451	1	1	1
SPINK5	0.000396586	-2.4774	1	1	1
LOR	0.00054946	-4.81058	1	0.984	1
GJB2	0.000752088	-1.49586	1	1	1
PI3	0.00185401	-2.26472	1	1	1
KLK7	0.00421137	-2.65351	1	1	1
TGM3	0.00443716	-3.39291	1	1	1
GPX3	0.0103266	-2.07947	1	1	1
CLU	0.0130464	-1.03224	1	1	1
SLPI	0.0162889	-1.53933	1	1	1
RPTN	0.0226254	-5.1174	0.997	0.99	1
IL36RN	0.0259897	-2.9869	1	1	1
SPRR1B	0.0370185	-0.840838	1	1	1
KLK12	0.0569227	-2.17824	1	1	1
KLK10	0.0583021	-2.475	1	0.998	1
KRT80	0.0758641	-3.20631	1	1	1
KRT3	0.16123	-1.28733	0.994	0.993	1
LCE3D	0.203481	-4.37466	0.994	0.996	1
S100A2	0.206616	-1.03851	1	1	1
SCEL	0.304351	-1.57599	1	1	1
SBSN	0.307403	-1.75259	1	1	1
NCCRP1	0.308671	-2.59908	1	1	1
TGM1	0.469792	-1.93787	0.981	0.991	1
PPIF	0.480137	-2.30468	0.997	0.996	1
DMKN	0.533071	-1.49623	1	1	1
NR4A2	0.580892	-0.63614	1	0.998	1
KLK13	0.722268	-2.53003	1	1	1
KRT78	0.892522	-3.91076	1	0.999	1

## Sheet: B1 - cluster 7
	p_val	avg_log2FC	pct.1	pct.2	p_val_adj
PLPP3	1.09181e-99	2.07162	1	0.985	1.95904e-95
IL36G	3.5276e-94	-3.6426	0.783	0.998	6.32957e-90
CLU	2.44909e-90	1.77155	1	1	4.3944e-86
CFD	1.28105e-85	2.12382	1	0.988	2.29858e-81
APOD	3.14717e-85	1.96528	0.996	0.991	5.64697e-81
CXCL14	4.88097e-85	1.63065	1	1	8.75792e-81
C1R	4.565e-79	1.75247	1	0.995	8.19099e-75
SLIT3	2.82194e-76	1.51409	1	0.995	5.06341e-72
THY1	3.03334e-76	1.81646	1	0.986	5.44272e-72
THBS2	9.06999e-76	1.52493	1	0.991	1.62743e-71
DCN	2.55169e-73	1.57199	1	1	4.57849e-69
IGFBP4	1.07643e-68	1.54016	1	1	1.93143e-64
AQP1	1.7083e-66	1.30823	1	1	3.0652e-62
CCN1	5.44969e-65	1.39507	1	0.991	9.77838e-61
MFAP4	6.36245e-65	1.49608	1	1	1.14161e-60
COL6A2	1.53939e-63	1.30643	1	1	2.76213e-59
LUM	2.68036e-62	0.75296	1	1	4.80937e-58
TMPRSS11D	4.29357e-62	-2.7189	1	1	7.70396e-58
PDGFRA	1.67408e-61	1.12007	1	0.994	3.0038e-57
TACSTD2	1.70117e-61	-2.29274	1	1	3.0524e-57
FBLN2	4.15957e-60	1.37991	0.996	0.949	7.46351e-56
AEBP1	4.69558e-60	1.23352	1	0.998	8.42528e-56
COL6A1	5.58567e-60	1.48613	1	0.991	1.00224e-55
COL14A1	6.472e-59	1.29604	1	1	1.16127e-54
GJB2	7.30375e-59	-2.45138	1	1	1.31051e-54
COL1A2	1.05677e-58	0.896177	1	1	1.89616e-54
RARRES2	2.53327e-57	1.07706	1	1	4.54545e-53
DKK3	1.09198e-56	0.862868	1	1	1.95934e-52
SLPI	6.86827e-56	-2.39562	1	1	1.23237e-51
C1S	7.34301e-56	1.01472	1	0.988	1.31756e-51
CD24	1.62901e-53	-2.50332	1	1	2.92294e-49
GLTP	5.48118e-53	-2.23035	1	1	9.83488e-49
S100A4	2.10256e-52	1.1203	1	1	3.77262e-48
FBLN1	4.61756e-52	0.740796	1	1	8.28529e-48
PRSS27	4.56125e-51	-2.92714	1	0.998	8.18425e-47
COL5A1	4.22261e-49	0.528062	1	0.998	7.57663e-45
SERPINF1	1.07119e-48	0.771082	1	1	1.92204e-44
TIMP2	4.57546e-47	0.46457	1	0.994	8.20974e-43
FMOD	9.62075e-47	0.654996	1	1	1.72625e-42
COL1A1	3.23484e-46	0.340357	1	1	5.80428e-42
SLURP1	4.34765e-46	-3.6261	1	1	7.80099e-42
PCOLCE	3.37201e-45	0.744332	1	0.99	6.05039e-41
FSTL1	1.24614e-43	0.76073	1	0.999	2.23595e-39
SOD3	4.68435e-43	0.577808	0.996	0.996	8.40513e-39
CTSK	1.92028e-42	0.478708	1	1	3.44556e-38
SPRR1B	1.6386e-40	-1.94628	1	1	2.94014e-36
COL3A1	2.8319e-40	0.39537	1	1	5.08127e-36
LCE3E	5.17429e-40	-1.99676	1	1	9.28423e-36
PTGDS	1.7157e-39	0.504435	0.991	0.996	3.07847e-35
KRT24	3.85296e-39	-2.5827	1	1	6.91337e-35
IGHG1	2.6586e-37	-1.20303	1	1	4.77033e-33
SERPINB13	3.71874e-36	-2.54322	1	1	6.67254e-32
IL36RN	1.51694e-35	-3.29356	1	1	2.72185e-31
SPRR2G	2.32424e-35	-3.52225	1	0.999	4.17038e-31
FN1	2.54245e-35	0.568405	0.996	0.995	4.56192e-31
MYL9	1.01044e-34	-0.547406	1	1	1.81304e-30
LRRC15	1.25905e-34	-0.67847	1	0.993	2.25911e-30
PPL	9.30522e-34	-2.15384	1	1	1.66963e-29
SERPING1	1.3546e-33	0.545415	1	1	2.43055e-29
EVPL	1.12893e-31	-1.73162	1	1	2.02564e-27
VIM	1.28348e-31	0.702363	1	0.999	2.30294e-27
IGKC	4.25944e-31	-2.03654	1	1	7.64271e-27
SPARCL1	2.76846e-30	-1.06854	1	0.995	4.96744e-26
NCCRP1	3.21012e-29	-3.16725	1	1	5.75992e-25
GJB6	3.54557e-28	-2.16384	1	1	6.36181e-24
CXCL12	1.06586e-27	0.757449	1	1	1.91247e-23
ACTA2	1.35663e-27	-1.25942	0.996	0.98	2.4342e-23
KCTD12	5.79703e-27	0.415246	1	1	1.04016e-22
COL5A2	1.18391e-26	-0.33126	1	1	2.12429e-22
PRRX1	6.61234e-26	0.319923	1	0.996	1.18645e-21
CTNNBIP1	1.43783e-25	-1.86413	1	1	2.57989e-21
TAGLN	2.39337e-25	-1.05519	1	0.987	4.29442e-21
HOPX	3.61492e-25	-2.50945	1	1	6.48625e-21
FBN1	7.52152e-24	0.336366	1	0.999	1.34959e-19
IFITM3	1.96174e-23	0.616021	1	1	3.51994e-19
SELE	3.64224e-22	0.281254	1	0.995	6.53527e-18
CRCT1	4.32782e-22	-2.35652	1	0.983	7.76542e-18
CD74	4.77771e-22	0.655574	1	1	8.57264e-18
TPM1	8.29423e-22	-0.485957	1	1	1.48823e-17
LAD1	1.02356e-21	-1.39855	0.996	0.997	1.83657e-17
SFRP4	1.39655e-21	-3.78338	0.578	0.905	2.50584e-17
IGFBP5	6.69682e-21	0.404506	1	1	1.20161e-16
POF1B	2.22676e-20	-2.58429	1	1	3.99548e-16
OLFML2B	3.0757e-20	-0.396203	1	1	5.51872e-16
CLIC3	1.21781e-19	-2.61501	1	1	2.18512e-15
COL17A1	1.28121e-19	-0.358537	0.996	1	2.29888e-15
CRISPLD2	7.27811e-19	-0.506627	1	0.996	1.30591e-14
FOSB	1.50229e-18	-2.79308	1	1	2.69556e-14
KLK10	6.87443e-18	-3.17467	0.991	0.999	1.23348e-13
HSPB8	8.15071e-18	-1.99533	1	1	1.46248e-13
KLK6	1.29493e-17	-2.57422	1	1	2.32348e-13
CLDN4	1.58228e-17	-2.21435	1	1	2.83909e-13
IGLC1	2.20974e-17	-1.85371	1	0.996	3.96493e-13
IGHG2	2.46455e-16	-2.16446	1	0.999	4.42214e-12
LAMB3	3.5111e-16	-1.42103	0.978	0.992	6.29996e-12
RPTN	6.37053e-16	-4.26195	0.983	0.992	1.14306e-11
SOCS3	7.68805e-16	-1.75741	1	0.998	1.37947e-11
MXRA8	1.57734e-15	-0.798094	1	0.997	2.83023e-11
LYPD5	1.10931e-14	-2.75126	1	1	1.99043e-10
DMKN	1.1389e-14	-2.10024	1	1	2.04353e-10
RGS3	7.56547e-14	-0.463667	1	1	1.35747e-09
CDSN	1.88063e-13	-4.26533	1	1	3.37441e-09
KRT4	3.51826e-13	-1.13429	1	0.989	6.31282e-09
IGHG4	6.38003e-13	-2.72131	1	0.996	1.14477e-08
TGM1	4.02687e-12	-2.48031	0.996	0.989	7.22542e-08
COL4A2	7.20965e-12	-0.461449	1	0.998	1.29363e-07
SAT1	1.3563e-11	-1.07112	1	0.997	2.43362e-07
SCEL	5.57073e-11	-1.98056	1	1	9.99556e-07
KRT76	1.55671e-10	-1.55512	1	1	2.7932e-06
KRT10	2.35317e-10	-2.00368	1	1	4.22229e-06
ALOX12B	1.01429e-09	-2.29082	1	1	1.81994e-05
CRNN	1.14087e-09	-3.27501	1	1	2.04707e-05
ATF3	2.29715e-09	-1.09672	1	0.999	4.12178e-05
OGN	2.65087e-09	-1.5961	0.97	0.975	4.75646e-05
TIMP3	3.35328e-09	-1.09552	0.996	0.965	6.0168e-05
IGHA1	6.44142e-09	-2.38689	1	0.999	0.000115578
LCE3D	6.82976e-09	-3.85114	1	0.996	0.000122546
S100A14	1.69393e-08	-1.00955	1	1	0.000303942
TMPRSS11E	4.33625e-08	-2.44496	0.996	0.997	0.000778054
IGFBP3	6.11874e-08	-0.919233	1	1	0.00109789
DSC2	7.2468e-08	-1.4426	1	1	0.00130029
KRT1	1.35989e-07	-1.31561	1	1	0.00244006
SBSN	3.33842e-07	-2.24023	1	1	0.00599013
IGKV4-1	6.17385e-07	-1.8573	0.996	0.978	0.0110777
SPNS2	6.41395e-07	-2.24222	1	1	0.0115085
CLDN5	6.56017e-07	-0.856787	0.957	0.95	0.0117709
LCN2	1.09597e-06	-2.93448	1	1	0.0196651
CRTAC1	2.1656e-06	-1.61787	0.952	0.995	0.0388574
KRT78	2.96016e-06	-3.9453	1	0.999	0.0531142
JCHAIN	3.75599e-06	-2.49089	1	0.977	0.0673937
KLK5	4.5231e-06	-2.09094	1	1	0.081158
TM4SF1	5.46482e-06	-1.36971	0.991	0.996	0.0980552
C11orf96	2.35556e-05	-1.87503	0.774	0.909	0.422658
TGM3	2.5717e-05	-2.89612	1	1	0.461441
PPIF	5.29103e-05	-2.19687	1	0.996	0.949369
GPX3	0.000100458	-2.28232	1	1	1
SPINK7	0.000155185	-3.50397	1	1	1
S100A2	0.000162849	-0.514335	1	1	1
KRT13	0.00022482	-2.55671	1	1	1
POSTN	0.000241379	-3.06818	0.996	0.996	1
RHCG	0.000367069	-2.51573	1	1	1
SPRR3	0.000440366	-2.42117	1	1	1
IVL	0.000806617	-2.06802	1	1	1
TMPRSS11B	0.00165603	-2.34994	1	1	1
CALML5	0.00167281	-3.14866	0.996	0.983	1
TNS4	0.0018172	-0.457376	1	0.981	1
A2M	0.00242475	-1.84293	0.978	0.95	1
MAL	0.00385798	-2.22491	0.996	0.991	1
GLUL	0.0057873	-1.67927	1	1	1
LOR	0.0114723	-4.9483	0.974	0.987	1
EPPK1	0.0124417	-1.25351	1	1	1
MT2A	0.017053	-0.393596	1	1	1
ASPN	0.0284815	-2.33831	0.957	0.95	1
CFH	0.0340442	-0.351347	1	1	1
KRT80	0.0499649	-3.19004	1	1	1
KRT3	0.105592	-1.46155	0.983	0.994	1
SLURP2	0.125131	-2.04482	1	0.998	1
NR4A2	0.199754	-0.628418	1	0.998	1
RGS5	0.219485	-1.36356	1	0.997	1
DSG1	0.289063	-1.12405	0.996	1	1
KLK13	0.297729	-2.69398	1	1	1
EGR1	0.318689	-0.722254	1	1	1
KLK7	0.343155	-2.56754	1	1	1
S100A7	0.428554	-2.61006	1	0.998	1
ALDH3A1	0.546931	-0.915852	1	0.999	1
KLK12	0.558483	-1.99415	1	1	1
KRTDAP	0.602823	-2.41846	0.996	0.999	1
COL4A1	0.663041	-0.680077	0.961	0.972	1
PI3	0.681619	-2.50399	1	1	1
SOD2	0.83163	-0.822348	1	1	1
PHLDA1	0.891103	-0.484203	1	1	1
SPRR2F	0.936658	-2.57565	0.996	0.985	1
ODAPH	0.949697	-1.06291	1	1	1
SPINK5	0.953763	-2.32475	1	1	1
CNFN	0.973658	-3.21287	1	1	1
HIST1H1B	0.993932	-0.635862	1	0.999	1
SPRR2D	0.993932	-2.80195	0.996	0.998	1
FDCSP	0.998771	-3.35989	1	1	1

## Sheet: B1 - cluster 8
	p_val	avg_log2FC	pct.1	pct.2	p_val_adj
S100A2	3.65232e-135	2.49762	1	1	6.55335e-131
CDSN	3.60306e-125	-5.2298	1	1	6.46497e-121
LAMB3	3.98638e-115	2.21917	1	0.99	7.15276e-111
TACSTD2	7.70292e-114	2.0759	1	1	1.38213e-109
TM4SF1	1.59952e-112	1.9116	1	0.996	2.87002e-108
ATF3	3.06965e-109	1.78453	1	0.999	5.50788e-105
SAT1	1.58284e-107	1.99663	1	0.997	2.84009e-103
TGM3	3.91229e-107	-5.45304	1	1	7.01981e-103
CLDN4	6.1798e-106	2.30995	1	1	1.10884e-101
FOSB	1.85512e-104	2.36688	1	1	3.32864e-100
KRT13	9.5493e-103	1.50374	1	1	1.71343e-98
CLU	1.06828e-101	-2.74336	1	1	1.91681e-97
KRT1	1.49279e-101	-4.81396	1	1	2.67852e-97
FDCSP	1.99652e-100	3.35891	1	1	3.58236e-96
SPRR2G	2.35537e-98	-6.65845	0.996	1	4.22625e-94
HIST1H1B	4.32118e-98	1.72693	1	0.999	7.75349e-94
MT2A	1.10254e-97	1.32398	1	1	1.97829e-93
TMPRSS11E	1.36197e-96	0.768276	1	0.997	2.44379e-92
KRT10	2.86952e-96	-4.49727	1	1	5.14878e-92
KRT76	1.55703e-94	-4.5482	1	1	2.79378e-90
ODAPH	7.44362e-91	2.91973	1	1	1.33561e-86
RPTN	9.79702e-84	-6.61374	0.996	0.991	1.75788e-79
LCE3D	2.39779e-83	-5.85339	0.996	0.996	4.30236e-79
GLUL	2.01769e-82	1.08812	1	1	3.62034e-78
MT1X	4.30935e-82	1.4438	1	1	7.73227e-78
KRT4	1.2189e-76	0.256999	1	0.989	2.18707e-72
IL36G	1.1669e-72	2.24564	1	0.976	2.09378e-68
CALML5	4.31985e-70	-3.82356	0.996	0.983	7.75112e-66
TNS4	8.02643e-70	1.43321	1	0.981	1.44018e-65
SPINK7	1.94509e-69	-4.94793	1	1	3.49008e-65
LCE3E	5.83763e-68	-2.91976	1	1	1.04745e-63
KRTDAP	9.75855e-67	-3.84669	1	0.998	1.75098e-62
RHCG	9.02272e-65	1.39118	1	1	1.61895e-60
ALOX12B	2.51725e-64	-2.55675	1	1	4.51671e-60
SPARCL1	6.07457e-61	-2.7241	0.996	0.996	1.08996e-56
SPRR2F	1.97487e-56	-0.342052	1	0.984	3.54351e-52
CD24	1.02608e-51	1.02337	1	1	1.84109e-47
SLURP1	2.48912e-51	-3.56491	1	1	4.46623e-47
SLURP2	4.53975e-51	-2.83598	1	0.998	8.14568e-47
IGFBP3	1.97797e-50	-1.69043	1	1	3.54908e-46
HSPB8	2.80653e-50	-2.22304	1	1	5.03575e-46
EGR1	2.04485e-49	0.996948	1	1	3.66907e-45
PHLDA1	3.97436e-48	0.581523	1	1	7.13119e-44
KLK7	1.13153e-47	-3.35152	1	1	2.0303e-43
KRT3	1.12766e-45	-2.56842	0.966	0.996	2.02335e-41
SLIT3	3.66424e-45	-1.93001	0.958	0.999	6.57475e-41
LYPD5	3.77099e-45	-2.93911	1	1	6.76629e-41
SOD2	4.93589e-45	1.02829	1	1	8.85647e-41
SOCS3	9.84923e-45	0.717277	1	0.998	1.76725e-40
S100A14	1.00323e-41	0.889348	1	1	1.80009e-37
GJB2	2.41502e-37	0.382105	1	1	4.33327e-33
CFH	7.87047e-35	0.619647	1	1	1.4122e-30
DSG1	1.11705e-34	-2.99438	1	1	2.00433e-30
LCN2	4.81962e-34	-1.01276	1	1	8.64785e-30
CXCL14	8.76245e-34	-2.12812	1	1	1.57225e-29
TAGLN	1.24801e-33	-3.48391	0.971	0.99	2.2393e-29
KRT24	3.35049e-33	-2.55838	1	1	6.01178e-29
KRT78	4.21989e-33	-4.53471	1	0.999	7.57175e-29
KLK5	9.9724e-32	-2.40558	1	1	1.78935e-27
AQP1	3.26494e-30	-2.79466	1	1	5.85828e-26
SERPINB13	4.88034e-30	0.293378	1	1	8.7568e-26
CRISPLD2	4.88376e-30	-2.45914	0.996	0.997	8.76293e-26
CRNN	9.36374e-30	-4.44949	1	1	1.68014e-25
LOR	3.50188e-28	-5.68047	0.992	0.985	6.28342e-24
ACTA2	2.42701e-27	-3.47459	0.971	0.983	4.35478e-23
SPINK5	3.43265e-27	-2.77479	1	1	6.15921e-23
MYL9	1.87633e-26	-3.2541	1	1	3.36669e-22
HOPX	4.27285e-24	-2.43233	1	1	7.66678e-20
TIMP2	6.77277e-24	-3.496	1	0.994	1.21524e-19
PDGFRA	1.58477e-23	-1.77203	0.996	0.995	2.84356e-19
SPNS2	1.71203e-23	-2.39585	1	1	3.07189e-19
MFAP4	5.1676e-23	-1.97205	1	1	9.27222e-19
KRT80	7.97356e-23	-3.54798	1	1	1.4307e-18
A2M	2.03678e-21	-3.57597	0.958	0.952	3.6546e-17
APOD	6.59262e-20	-2.63575	0.996	0.991	1.18291e-15
TIMP3	5.28022e-19	-3.15784	0.983	0.966	9.4743e-15
LRRC15	7.89186e-19	-2.87298	0.966	0.997	1.41604e-14
CRTAC1	1.08045e-18	-2.62082	0.992	0.991	1.93866e-14
OGN	1.12196e-18	-2.68412	0.937	0.978	2.01314e-14
SBSN	2.1458e-18	-2.04354	1	1	3.85021e-14
DST	2.44505e-17	-2.07588	1	0.997	4.38716e-13
PRSS27	3.80953e-16	-1.97805	1	0.998	6.83544e-12
SPRR2D	7.10427e-16	-2.12809	1	0.997	1.27472e-11
TMPRSS11B	1.15321e-15	-2.67816	1	1	2.0692e-11
PTGDS	2.4784e-15	-1.78014	1	0.995	4.44699e-11
PPIF	2.96455e-15	-2.09635	1	0.996	5.31929e-11
CNFN	3.81378e-15	-4.12837	1	1	6.84307e-11
EPPK1	2.05994e-14	-1.32848	1	1	3.69616e-10
CCN1	3.05809e-14	-2.50251	1	0.991	5.48712e-10
MAL	3.74388e-14	-1.98139	1	0.99	6.71764e-10
NCCRP1	4.90627e-14	-2.21584	1	1	8.80333e-10
CLIC3	5.59268e-14	-1.55298	1	1	1.00349e-09
IGHA1	7.4494e-14	-2.82108	1	0.999	1.33665e-09
IGFBP7	1.00785e-13	-3.50408	0.992	0.995	1.80839e-09
HTRA1	1.40789e-13	-2.57634	1	1	2.52618e-09
TMPRSS11D	6.16741e-13	-0.428939	1	1	1.10662e-08
SOD3	1.28429e-12	-3.23194	0.987	0.997	2.3044e-08
KLK10	7.09257e-12	-2.98791	1	0.998	1.27262e-07
DKK3	1.20715e-11	-2.21165	1	1	2.16599e-07
GPX3	5.21117e-11	-2.14038	1	1	9.35041e-07
CRCT1	5.73389e-11	-4.39499	0.987	0.984	1.02883e-06
COL5A2	9.4698e-11	-2.36808	1	1	1.69917e-06
COL17A1	1.84754e-10	-1.97934	1	1	3.31504e-06
COL6A1	3.68879e-10	-2.64676	1	0.991	6.61879e-06
C1R	4.13353e-10	-2.80051	1	0.995	7.41679e-06
RARRES2	5.26671e-10	-1.7046	1	1	9.45007e-06
COL14A1	1.12422e-09	-1.8774	1	1	2.01719e-05
THY1	1.45384e-09	-2.03611	0.971	0.989	2.60863e-05
COL6A2	1.73694e-09	-2.85237	1	1	3.1166e-05
VCAN	5.65925e-09	-1.25647	1	1	0.000101544
FBLN2	6.42619e-09	-1.79714	0.975	0.951	0.000115305
PLPP3	8.44205e-09	-1.6422	0.979	0.987	0.000151476
THBS2	2.0394e-08	-2.92284	0.975	0.994	0.00036593
C1S	2.66722e-08	-2.96652	1	0.988	0.000478579
CLDN5	4.26262e-08	-2.05527	0.971	0.948	0.000764843
KLK6	5.32311e-08	-2.38582	1	1	0.000955126
TGM1	5.72538e-08	-1.10764	0.992	0.99	0.0010273
KLK12	5.75274e-08	-2.63292	1	1	0.00103221
COL5A1	6.96422e-08	-2.24687	1	0.998	0.00124959
CFD	1.13307e-07	-2.45239	0.996	0.989	0.00203307
DMKN	1.18313e-07	-1.93133	1	1	0.00212289
IFITM2	3.20302e-07	-1.23039	1	0.999	0.00574717
TPM1	3.49855e-07	-1.55602	1	1	0.00627745
IGHG4	4.31557e-07	-2.841	1	0.996	0.00774344
SCEL	9.18141e-07	-1.23367	1	1	0.0164742
JCHAIN	1.12258e-06	-3.14416	1	0.977	0.0201424
FBLN1	1.18765e-06	-2.62899	1	1	0.02131
IFITM3	1.48227e-06	-0.810467	1	1	0.0265963
LAMA4	1.57131e-06	-1.29872	1	1	0.028194
SERPING1	1.86077e-06	-1.71434	1	1	0.0333879
ASPN	2.22047e-06	-3.38798	0.992	0.946	0.0398418
FMOD	2.62453e-06	-2.66679	1	1	0.0470919
PDGFRB	2.79769e-06	-1.75761	1	1	0.050199
FN1	4.24908e-06	-2.91768	0.992	0.995	0.0762412
AEBP1	4.85682e-06	-4.19202	0.979	1	0.0871459
SERPINF1	1.19148e-05	-2.76894	1	1	0.213788
FGFR1	1.41515e-05	-1.89637	1	1	0.253921
S100A4	1.55549e-05	-1.72801	1	1	0.279102
COL6A3	2.93414e-05	-2.42978	1	1	0.526472
IGHG2	5.21335e-05	-2.66397	0.996	0.999	0.935432
IGFBP4	7.9428e-05	-2.63381	1	1	1
NFATC4	8.8069e-05	-1.88154	0.996	1	1
S100A7	0.000126458	-1.98962	1	0.998	1
OLFML2B	0.000151045	-1.709	1	1	1
GLTP	0.000187771	-1.10258	1	1	1
CXCL12	0.000190417	-3.15151	1	1	1
VIM	0.000192449	-2.87162	1	0.999	1
FBN1	0.000292743	-1.89308	1	0.999	1
COL12A1	0.000299964	-3.52685	1	1	1
RGS5	0.000320315	-1.57162	1	0.997	1
FSTL1	0.000647455	-2.26222	1	0.999	1
IGLC1	0.000795127	-2.91787	0.996	0.996	1
PRRX1	0.00130631	-1.81927	1	0.996	1
CTSK	0.0016447	-2.69955	1	1	1
PCOLCE	0.00179297	-2.37377	0.979	0.992	1
LUM	0.00223255	-3.1869	1	1	1
PI3	0.00225779	-2.46969	1	1	1
IGKC	0.00239298	-3.34076	1	1	1
IL36RN	0.00266912	-2.99459	1	1	1
SFRP4	0.00293921	-4.35071	0.983	0.864	1
KCTD12	0.00303365	-1.15271	1	1	1
MMP2	0.00384329	-3.61289	0.983	1	1
COL4A2	0.00406898	-1.34029	1	0.998	1
C11orf96	0.00657733	-2.07422	1	0.885	1
POF1B	0.00969023	-2.21536	1	1	1
COL1A2	0.0140172	-3.46132	1	1	1
CCN2	0.0154131	-1.84153	1	0.999	1
GJB6	0.0159145	-1.31973	1	1	1
BGN	0.0169983	-2.83913	1	1	1
LGALS1	0.0212837	-1.66073	1	1	1
SPARC	0.0249249	-3.11818	1	1	1
CTNNBIP1	0.0254593	-1.15697	1	1	1
DCN	0.028075	-1.47065	1	1	1
SPRR1B	0.0326555	-0.615882	1	1	1
HSPG2	0.0423407	-1.1493	1	1	1
POSTN	0.0455391	-4.64516	0.996	0.996	1
IGFBP5	0.0787445	-0.355312	1	1	1
PPL	0.10785	-1.45736	1	1	1
RGS3	0.276632	-1.1919	1	1	1
SPRR3	0.303808	-2.43619	1	1	1
MXRA8	0.362121	-2.21905	1	0.997	1
RASD1	0.427481	-1.2027	1	0.996	1
IVL	0.480207	-1.62506	1	1	1
COL3A1	0.677303	-1.96099	1	1	1
IGHG1	0.691895	-3.77678	1	1	1
IGKV4-1	0.697946	-2.22934	1	0.977	1
NR4A1	0.722485	-0.46728	1	1	1
COL1A1	0.744578	-3.45814	1	1	1
LAD1	0.78639	-0.303447	1	0.997	1
COL4A1	0.805959	-0.755796	0.996	0.968	1
DSC2	0.809155	-0.7795	1	1	1
KLK13	0.842003	-2.57354	1	1	1
SELE	0.844235	-1.08773	0.987	0.996	1
CD74	0.85751	-0.559098	1	1	1

## Sheet: B1 - cluster 9
	p_val	avg_log2FC	pct.1	pct.2	p_val_adj
ASPN	2.7136e-155	5.69597	1	0.944	4.86901e-151
CRTAC1	6.22631e-155	4.58994	1	0.99	1.11719e-150
MMP2	8.42425e-155	4.5313	1	0.998	1.51156e-150
OLFML2B	9.15755e-155	3.30823	1	1	1.64314e-150
SPARC	1.44802e-154	3.93657	1	1	2.59818e-150
POSTN	1.63e-154	6.05665	1	0.996	2.92471e-150
LGALS1	2.76141e-154	3.12554	1	1	4.9548e-150
COL6A3	3.44865e-154	3.25531	1	1	6.18791e-150
LRRC15	7.04441e-154	4.42122	1	0.993	1.26398e-149
COL5A1	9.07489e-154	3.44226	1	0.998	1.62831e-149
COL1A1	2.15591e-153	4.08165	1	1	3.86836e-149
COL12A1	2.51156e-153	4.2112	1	1	4.5065e-149
SFRP4	3.10372e-153	5.92044	1	0.86	5.569e-149
OGN	3.16207e-153	4.99602	1	0.971	5.6737e-149
COL5A2	3.75008e-153	3.65104	1	1	6.72878e-149
LUM	4.38416e-153	4.09301	1	1	7.8665e-149
BGN	7.39631e-153	3.53459	1	1	1.32712e-148
FMOD	9.44647e-153	3.24876	1	1	1.69498e-148
FBLN1	1.06659e-152	3.36266	1	1	1.91379e-148
MXRA8	1.15607e-152	3.66066	1	0.997	2.07433e-148
HOPX	1.5172e-152	-4.54225	1	1	2.72232e-148
COL3A1	7.69558e-152	3.37861	1	1	1.38082e-147
CTSK	1.18579e-151	3.57229	1	1	2.12766e-147
COL1A2	1.82229e-151	4.0013	1	1	3.26973e-147
HTRA1	6.97151e-151	3.31127	1	1	1.2509e-146
FGFR1	8.81165e-151	3.55253	1	1	1.58107e-146
SPINK5	1.14367e-150	-3.95635	1	1	2.05208e-146
PCOLCE	1.22333e-150	3.1697	1	0.99	2.19502e-146
COL6A2	1.42291e-150	2.85552	1	1	2.55312e-146
FSTL1	3.2082e-150	2.72183	1	0.999	5.75648e-146
RGS3	6.29961e-150	2.61807	1	1	1.13034e-145
VIM	8.69082e-150	2.5817	1	0.999	1.55939e-145
PPL	1.9313e-149	-3.50513	1	1	3.46533e-145
TIMP2	2.81463e-149	3.48635	1	0.994	5.05029e-145
SERPINF1	3.31043e-149	3.36757	1	1	5.9399e-145
KLK7	1.18831e-148	-4.43708	1	1	2.13219e-144
NCCRP1	3.22437e-148	-3.75066	1	1	5.78548e-144
NFATC4	1.34284e-147	2.56499	1	0.999	2.40946e-143
EPPK1	1.45551e-147	-3.31544	1	1	2.61161e-143
DKK3	2.21335e-147	2.81479	1	1	3.97142e-143
AEBP1	2.61067e-147	3.38254	1	0.998	4.68432e-143
NR4A1	5.15606e-147	2.24483	1	1	9.25151e-143
SERPING1	2.3364e-146	2.11041	1	1	4.1922e-142
PRRX1	3.32288e-146	2.6263	1	0.996	5.96225e-142
POF1B	4.52714e-146	-3.24448	1	1	8.12306e-142
SBSN	3.41271e-145	-4.4732	1	1	6.12343e-141
ALDH3A1	7.50025e-145	-3.38378	0.992	1	1.34577e-140
KLK13	1.61992e-144	-4.38315	1	1	2.90663e-140
SCEL	2.35845e-144	-2.94967	1	1	4.23178e-140
EVPL	3.76833e-144	-3.60157	1	1	6.76151e-140
CTNNBIP1	2.59512e-143	-3.43511	1	1	4.65643e-139
CRISPLD2	3.75476e-143	2.95399	1	0.996	6.73716e-139
DSG1	1.41542e-142	-4.78533	1	1	2.53969e-138
THBS2	3.97139e-142	3.30152	1	0.991	7.12586e-138
DCN	4.3266e-142	2.28413	1	1	7.76322e-138
IVL	2.8745e-141	-4.42401	0.996	1	5.15771e-137
C1S	3.20865e-141	3.00039	1	0.988	5.75728e-137
IL36RN	6.27921e-141	-3.51372	1	1	1.12668e-136
GJB2	7.26524e-141	-3.61231	1	1	1.3036e-136
SPRR1B	3.14814e-139	-3.38436	1	1	5.6487e-135
FN1	1.20721e-138	2.72533	1	0.994	2.1661e-134
COL6A1	1.50771e-138	2.54145	1	0.991	2.70528e-134
PDGFRA	1.69509e-138	2.26698	1	0.994	3.0415e-134
GLTP	2.01015e-138	-2.70798	1	1	3.60681e-134
LAD1	7.42137e-138	-3.82816	0.992	0.998	1.33162e-133
HSPB8	1.46809e-137	-2.62655	1	1	2.6342e-133
RASD1	9.56927e-137	2.36818	1	0.996	1.71701e-132
LAMA4	2.84749e-135	2.01603	1	1	5.10926e-131
DSC2	1.05572e-134	-4.12354	1	1	1.89427e-130
IGFBP4	4.09858e-134	2.07482	1	1	7.35409e-130
GPX3	3.64456e-133	-3.19357	1	1	6.53944e-129
IGFBP5	7.78053e-133	2.13914	1	1	1.39606e-128
GJB6	1.18652e-132	-2.66698	1	1	2.12897e-128
IGFBP2	2.57742e-131	-3.21069	1	1	4.62467e-127
C1R	1.22553e-129	2.3863	1	0.995	2.19897e-125
TMPRSS11D	4.01251e-129	-3.25057	1	1	7.19964e-125
RARRES2	4.18605e-129	2.22505	1	1	7.51104e-125
CLIC3	1.95626e-128	-3.28859	1	1	3.51011e-124
VCAN	3.18661e-128	1.53828	1	1	5.71773e-124
S100A14	4.572e-128	-3.29932	1	1	8.20354e-124
FBN1	6.24616e-128	2.19262	1	0.999	1.12075e-123
SPINK7	1.15197e-127	-5.38955	1	1	2.06699e-123
CALML5	1.8566e-127	-4.16698	0.883	0.996	3.3313e-123
KLK10	1.07726e-126	-4.73996	0.992	0.999	1.93293e-122
TACSTD2	1.87772e-126	-3.1673	1	1	3.36919e-122
DMKN	1.61898e-125	-3.0921	1	1	2.90494e-121
MFAP4	2.17732e-125	2.00567	1	1	3.90676e-121
SLPI	2.32457e-124	-2.941	1	1	4.17098e-120
NR4A2	1.41467e-122	2.00098	1	0.998	2.53835e-118
PRSS27	3.96047e-122	-3.21373	0.992	0.999	7.10628e-118
S100A4	2.58946e-119	1.80572	1	1	4.64626e-115
MAL	3.89664e-119	-4.64575	0.936	0.998	6.99174e-115
KRT80	4.60167e-118	-3.97549	1	1	8.25678e-114
PDGFRB	3.69662e-117	1.83814	1	1	6.63285e-113
KRTDAP	9.37298e-116	-4.8973	0.989	1	1.68179e-111
TIMP3	3.00205e-115	2.61366	1	0.964	5.38658e-111
SERPINB13	1.84908e-114	-3.39084	1	1	3.3178e-110
CD24	1.97407e-112	-2.91754	1	1	3.54208e-108
KLK5	1.00649e-110	-2.90222	1	1	1.80595e-106
CNFN	1.48894e-110	-5.343	1	1	2.67161e-106
THY1	2.69934e-109	1.89507	1	0.986	4.84342e-105
SOD2	3.19038e-109	1.6927	1	1	5.72449e-105
KLK12	1.7793e-108	-3.2222	1	1	3.1926e-104
KRT78	5.20563e-108	-5.03377	0.989	1	9.34047e-104
PPIF	1.53751e-107	-3.59172	0.974	0.999	2.75875e-103
TMPRSS11B	4.34553e-106	-2.92499	1	1	7.79719e-102
LCE3E	1.56784e-105	-2.95868	1	1	2.81317e-101
TGM3	1.03693e-103	-5.23759	1	1	1.86056e-99
SLURP1	2.05048e-102	-3.91797	1	1	3.67918e-98
SLIT3	3.32126e-102	1.78478	1	0.995	5.95933e-98
KLK6	6.95342e-101	-2.75936	1	1	1.24765e-96
SPRR2D	1.24852e-99	-4.81216	0.989	0.999	2.24023e-95
SPRR3	2.01759e-99	-5.02059	1	1	3.62016e-95
CRCT1	1.00927e-98	-5.68045	0.921	0.992	1.81093e-94
COL14A1	1.05024e-97	1.55701	1	1	1.88445e-93
CCN2	2.32229e-97	1.69064	1	0.999	4.16689e-93
S100A2	3.67492e-97	-3.60139	1	1	6.59391e-93
KCTD12	4.00111e-95	1.07435	1	1	7.17919e-91
EGR1	8.25409e-95	1.5293	1	1	1.48103e-90
ALOX12B	2.37748e-94	-2.63851	1	1	4.26592e-90
KRT3	3.03737e-94	-3.29457	0.992	0.993	5.44995e-90
TPM1	3.54482e-92	0.938575	1	1	6.36047e-88
SLURP2	4.38494e-91	-3.22227	0.992	0.999	7.86789e-87
TGM1	5.19991e-90	-3.40634	0.944	0.996	9.3302e-86
RPTN	2.15617e-89	-6.60366	0.985	0.992	3.86882e-85
KRT76	3.00853e-88	-4.00234	1	1	5.3982e-84
TMPRSS11E	1.67667e-87	-2.78677	1	0.997	3.00846e-83
COL17A1	5.32578e-87	-3.76502	1	1	9.55605e-83
IFITM3	5.94544e-87	1.02295	1	1	1.06679e-82
SELE	2.08171e-85	1.29015	1	0.995	3.73521e-81
COL4A2	1.88364e-84	1.23488	1	0.998	3.37982e-80
HSPG2	1.89352e-82	1.02055	1	1	3.39755e-78
S100A7	1.90557e-82	-4.38197	0.989	1	3.41917e-78
PLPP3	7.18975e-81	1.28101	1	0.985	1.29006e-76
RGS5	4.7303e-80	0.911735	1	0.997	8.48758e-76
KRT10	7.11861e-80	-4.05496	1	1	1.27729e-75
KRT1	7.30586e-79	-4.10116	1	1	1.31089e-74
KRT24	1.61397e-78	-2.70693	1	1	2.89595e-74
LYPD5	3.28236e-78	-2.95705	1	1	5.88955e-74
FOSB	2.18975e-73	1.87068	1	1	3.92907e-69
SOD3	6.67142e-72	1.24681	1	0.996	1.19705e-67
KRT4	1.59776e-71	-2.31843	0.94	0.996	2.86687e-67
TNS4	2.67234e-71	-2.79601	0.955	0.987	4.79498e-67
CFH	1.28322e-68	1.02398	1	1	2.30247e-64
SOCS3	1.73055e-67	1.45687	1	0.998	3.10513e-63
COL4A1	7.69769e-67	1.01749	0.992	0.969	1.3812e-62
A2M	6.59947e-66	0.276585	1	0.947	1.18414e-61
CLU	7.65265e-66	1.2931	1	1	1.37312e-61
IGFBP7	2.5313e-65	0.758086	1	0.994	4.54191e-61
C11orf96	2.58555e-65	0.921231	0.981	0.886	4.63926e-61
PI3	1.29039e-64	-3.20468	1	1	2.31535e-60
CCN1	1.99088e-64	1.20695	1	0.991	3.57223e-60
SPRR2G	5.59824e-64	-5.99123	0.996	1	1.00449e-59
LOR	5.12069e-62	-6.00514	0.944	0.991	9.18806e-58
HIST1H1B	1.88932e-61	-1.99517	0.996	1	3.39e-57
CRNN	1.66365e-60	-4.79323	1	1	2.98509e-56
LCN2	7.48141e-58	-3.03953	1	1	1.34239e-53
IGFBP3	2.04164e-56	-1.58629	1	1	3.66332e-52
IFITM2	4.02412e-56	0.770006	1	0.999	7.22048e-52
CXCL12	8.54836e-56	1.3215	1	1	1.53383e-51
LAMB3	1.79413e-53	-1.98297	0.996	0.99	3.2192e-49
LCE3D	7.30237e-52	-5.5981	0.996	0.996	1.31026e-47
RHCG	3.85205e-49	-3.67759	1	1	6.91173e-45
KRT15	3.01873e-48	-3.31531	0.996	1	5.41651e-44
AQP1	2.05983e-46	0.645028	1	1	3.69594e-42
FBLN2	4.87561e-44	0.770123	1	0.947	8.7483e-40
SPARCL1	3.08795e-39	-0.825764	1	0.995	5.54072e-35
PHLDA1	4.68309e-39	0.414885	1	1	8.40287e-35
ACTA2	1.92744e-37	-0.950366	0.996	0.98	3.45841e-33
CD74	2.70203e-33	0.782871	1	1	4.84826e-29
ODAPH	8.08457e-29	-0.513523	1	1	1.45061e-24
CLDN5	4.33743e-27	-0.832178	0.996	0.945	7.78266e-23
PTGDS	2.56991e-26	-0.541791	1	0.995	4.61118e-22
IL36G	4.1822e-23	-2.62723	0.992	0.976	7.50411e-19
SPRR2F	5.23184e-23	-3.66863	0.917	0.994	9.38749e-19
ATF3	1.25794e-20	0.556501	1	0.999	2.25712e-16
JCHAIN	1.54466e-20	-1.81803	1	0.977	2.77158e-16
MT1X	1.33838e-17	-1.55463	1	1	2.40146e-13
IGKV4-1	2.33547e-17	-1.33301	1	0.977	4.19053e-13
SAT1	5.83323e-15	-1.06838	0.992	0.998	1.04666e-10
IGHA1	5.69645e-13	-1.91519	0.996	0.999	1.02211e-08
CDSN	5.07851e-12	-4.58091	1	1	9.11236e-08
IGHG1	5.91832e-12	-3.08414	1	1	1.06192e-07
APOD	2.23714e-11	-1.39449	1	0.99	4.01411e-07
CLDN4	1.54932e-10	-1.95023	1	1	2.77994e-06
IGKC	2.07863e-10	-3.85181	1	1	3.72968e-06
IGHG2	5.66485e-10	-3.1319	0.996	0.999	1.01644e-05
TM4SF1	1.29929e-08	-1.66697	0.992	0.996	0.000233132
FDCSP	2.29512e-07	-1.99799	1	1	0.00411814
CXCL14	2.84833e-07	-1.35786	1	1	0.00511076
KRT13	2.70871e-05	-3.52852	1	1	0.486023
IGLC1	8.81866e-05	-2.555	0.981	0.998	1
IGHG4	0.000169086	-4.37612	1	0.996	1
DST	0.000198575	-2.02524	1	0.997	1
GLUL	0.0327928	-1.63047	1	1	1
SPNS2	0.303071	-2.03698	1	1	1

## Sheet: B1 - cluster 10
	p_val	avg_log2FC	pct.1	pct.2	p_val_adj
ACTA2	2.51867e-144	4.87442	1	0.98	4.51926e-140
SPARCL1	4.79996e-144	4.49414	1	0.995	8.61258e-140
A2M	2.84011e-143	4.3952	1	0.948	5.09601e-139
IGFBP7	4.00925e-143	3.51534	1	0.994	7.1938e-139
CLDN5	4.56975e-143	3.76899	1	0.945	8.19949e-139
TAGLN	4.70807e-143	4.56052	1	0.987	8.4477e-139
MYL9	9.77045e-143	4.18862	1	1	1.75311e-138
AQP1	1.60745e-141	2.59721	1	1	2.88424e-137
TPM1	2.29193e-141	2.9098	1	1	4.11241e-137
HSPG2	4.75139e-141	2.49323	1	1	8.52543e-137
IFITM2	1.58146e-140	2.43317	1	0.999	2.83762e-136
SOD3	3.82309e-138	3.24462	1	0.996	6.85976e-134
PTGDS	2.30348e-136	2.72569	1	0.995	4.13314e-132
RGS5	8.46654e-136	3.14007	1	0.997	1.51915e-131
COL4A2	4.09464e-135	2.47279	1	0.998	7.34701e-131
C11orf96	2.64396e-133	3.29927	1	0.885	4.74406e-129
CXCL12	6.95904e-133	2.13516	1	1	1.24866e-128
CFH	2.47966e-132	1.92924	1	1	4.44925e-128
IFITM3	3.42754e-130	1.7179	1	1	6.15004e-126
KCTD12	1.58822e-127	2.09905	1	1	2.84974e-123
CD74	2.07976e-123	1.48082	1	1	3.73171e-119
APOD	2.76957e-123	3.20579	1	0.99	4.96944e-119
CFD	7.15561e-118	2.44413	1	0.988	1.28393e-113
COL4A1	4.26012e-116	2.23314	1	0.968	7.64394e-112
CCN2	1.63444e-112	1.90718	1	0.999	2.93268e-108
CCN1	3.48609e-107	1.74789	1	0.991	6.25509e-103
SERPINB13	3.51835e-107	-3.40455	1	1	6.31297e-103
FBLN2	4.56204e-107	1.84447	1	0.948	8.18568e-103
TIMP3	2.32078e-102	2.22792	1	0.964	4.16417e-98
PDGFRB	6.47275e-102	1.64474	1	1	1.16141e-97
COL14A1	3.32091e-100	1.67238	1	1	5.9587e-96
CLU	1.08096e-95	1.80366	1	1	1.93957e-91
IGLC1	5.1352e-92	1.78711	1	0.996	9.21408e-88
S100A4	3.44925e-90	1.56264	1	1	6.18898e-86
LAMA4	1.30308e-84	1.3326	1	1	2.33811e-80
KLK5	1.72591e-84	-2.76302	1	1	3.0968e-80
FBN1	9.15436e-83	1.57465	1	0.999	1.64257e-78
S100A14	7.07373e-82	-2.8568	1	1	1.26924e-77
DSC2	6.19247e-81	-3.21916	1	1	1.11112e-76
IGHG4	5.34157e-80	0.270193	1	0.996	9.58437e-76
JCHAIN	2.04237e-79	1.29422	1	0.977	3.66462e-75
VCAN	4.75374e-79	1.30568	1	1	8.52963e-75
SLIT3	1.47028e-78	1.47991	1	0.995	2.63813e-74
IGKC	3.18114e-78	0.36783	1	1	5.70791e-74
IGHG2	3.37636e-78	0.623378	0.996	0.999	6.0582e-74
PRRX1	7.85647e-78	1.22553	1	0.996	1.40969e-73
SERPING1	8.42962e-78	1.2076	1	1	1.51253e-73
IGHG1	8.97184e-78	0.773981	1	1	1.60982e-73
LAD1	5.67364e-77	-2.78154	0.988	0.998	1.01802e-72
FN1	1.21638e-74	1.63159	1	0.994	2.18255e-70
IGHA1	1.42564e-74	1.18053	1	0.999	2.55802e-70
POF1B	3.96703e-74	-2.98277	1	1	7.11804e-70
VIM	1.54974e-72	1.39437	1	0.999	2.78069e-68
IGKV4-1	5.61351e-72	0.995006	1	0.977	1.00723e-67
NFATC4	1.45923e-71	1.2313	1	0.999	2.6183e-67
EVPL	1.2844e-69	-2.38119	1	1	2.3046e-65
PLPP3	9.17589e-69	1.18108	1	0.985	1.64643e-64
CD24	1.00334e-68	-2.63764	1	1	1.80029e-64
BGN	1.86432e-68	0.842513	1	1	3.34515e-64
RGS3	4.1928e-67	0.649604	1	1	7.52314e-63
ALDH3A1	1.08659e-66	-2.64895	1	0.999	1.94968e-62
FSTL1	5.25906e-65	1.10997	1	0.999	9.43634e-61
CRISPLD2	4.74051e-64	1.17234	1	0.996	8.5059e-60
CRTAC1	1.07072e-63	-0.541329	1	0.99	1.92119e-59
C1S	1.54815e-63	0.967532	1	0.988	2.77784e-59
SELE	5.63491e-63	1.06362	1	0.995	1.01107e-58
IVL	1.47411e-62	-3.12036	1	1	2.645e-58
TMPRSS11D	1.82199e-61	-2.69408	1	1	3.2692e-57
THY1	4.9059e-60	1.11848	0.996	0.987	8.80266e-56
IGFBP3	9.40252e-60	1.4106	1	1	1.68709e-55
SFRP4	2.78048e-59	-1.0701	1	0.861	4.98901e-55
RASD1	2.50543e-58	1.30498	1	0.996	4.4955e-54
LGALS1	1.30857e-57	0.451068	1	1	2.34796e-53
SERPINF1	1.75045e-57	0.582817	1	1	3.14083e-53
MFAP4	2.00757e-57	0.880835	1	1	3.60218e-53
RARRES2	2.70205e-56	0.671481	1	1	4.84829e-52
DKK3	1.08018e-55	0.870238	1	1	1.93817e-51
SOD2	1.71224e-55	1.05444	1	1	3.07227e-51
HTRA1	2.51338e-55	0.592035	1	1	4.50975e-51
GJB2	7.68591e-55	-2.39779	1	1	1.37908e-50
COL6A3	4.32409e-53	0.563587	1	1	7.75871e-49
TIMP2	7.61356e-52	0.498712	1	0.994	1.3661e-47
SAT1	3.66571e-51	0.770219	1	0.997	6.57739e-47
TM4SF1	4.29328e-51	0.553283	1	0.996	7.70343e-47
CTNNBIP1	6.11102e-51	-2.42218	1	1	1.0965e-46
C1R	8.61e-51	0.840259	1	0.995	1.54489e-46
GJB6	5.22116e-50	-2.29996	1	1	9.36832e-46
SPINK5	1.01714e-49	-3.01646	1	1	1.82505e-45
PDGFRA	2.02074e-49	0.586946	1	0.994	3.62582e-45
FMOD	1.40691e-48	0.420709	1	1	2.52442e-44
PPL	1.49421e-48	-2.32043	1	1	2.68105e-44
SBSN	2.24654e-48	-2.89655	1	1	4.03097e-44
PCOLCE	5.52478e-48	0.469127	1	0.99	9.91312e-44
POSTN	5.9982e-48	-2.03164	1	0.996	1.07626e-43
AEBP1	1.89201e-47	0.383388	1	0.998	3.39483e-43
KRT80	8.64138e-47	-3.68454	1	1	1.55052e-42
DSG1	2.2425e-46	-3.23961	1	1	4.02372e-42
IGFBP4	1.43267e-45	1.10142	1	1	2.57064e-41
FBLN1	1.02591e-44	0.293632	1	1	1.84079e-40
FDCSP	2.974e-44	-0.56685	1	1	5.33624e-40
IGFBP5	3.68558e-43	0.72723	1	1	6.61304e-39
LRRC15	5.7361e-43	-0.716797	1	0.993	1.02923e-38
EGR1	6.9395e-43	0.889873	1	1	1.24515e-38
OGN	8.4573e-43	-1.52777	0.992	0.972	1.51749e-38
GLTP	3.44343e-41	-2.1556	1	1	6.17854e-37
ODAPH	3.97209e-40	-0.461982	1	1	7.12712e-36
PPIF	6.13975e-40	-2.98024	0.992	0.996	1.10165e-35
DCN	6.55941e-40	0.698336	1	1	1.17696e-35
COL6A1	9.01299e-40	0.617908	1	0.991	1.6172e-35
COL6A2	3.11314e-39	0.557022	1	1	5.58592e-35
NR4A1	1.08612e-35	0.629039	1	1	1.94883e-31
PI3	1.1024e-33	-2.99338	1	1	1.97803e-29
SPNS2	1.47964e-33	-1.40865	1	1	2.65492e-29
COL12A1	2.64836e-33	-0.505829	1	1	4.75194e-29
KLK10	1.74933e-32	-3.46178	0.996	0.998	3.13883e-28
SOCS3	4.27406e-31	0.578349	1	0.998	7.66895e-27
KRTDAP	5.323e-31	-3.67594	1	0.998	9.55106e-27
MMP2	2.08223e-29	-0.875328	1	0.998	3.73614e-25
DMKN	5.03596e-29	-2.24426	1	1	9.03602e-25
IL36RN	1.46851e-28	-3.13845	1	1	2.63495e-24
ASPN	1.76469e-28	-2.363	0.996	0.945	3.16639e-24
COL1A1	4.27962e-28	-0.814511	1	1	7.67892e-24
ALOX12B	1.11617e-27	-2.52875	1	1	2.00274e-23
CLIC3	1.60444e-27	-2.68048	1	1	2.87885e-23
KRT24	1.12459e-26	-2.54272	1	1	2.01785e-22
SLPI	3.91249e-26	-2.10697	1	1	7.02019e-22
EPPK1	1.90037e-25	-2.09386	1	1	3.40983e-21
KLK7	4.83113e-25	-3.09338	1	1	8.6685e-21
SPRR1B	7.63147e-25	-1.66372	1	1	1.36931e-20
LYPD5	1.19332e-24	-2.84657	1	1	2.14118e-20
GLUL	4.75337e-23	-0.543557	1	1	8.52898e-19
COL1A2	8.87204e-23	-1.2458	1	1	1.59191e-18
KLK13	3.8999e-22	-3.17572	1	1	6.9976e-18
LUM	7.69394e-22	-1.0334	1	1	1.38052e-17
SCEL	1.00322e-21	-2.07137	1	1	1.80007e-17
TGM1	1.78896e-21	-2.77015	1	0.989	3.20993e-17
KRT10	5.61499e-19	-3.28312	1	1	1.0075e-14
CDSN	5.07904e-18	-4.1215	1	1	9.11333e-14
S100A2	1.21193e-17	-1.96045	1	1	2.17456e-13
TACSTD2	1.48328e-17	-1.60093	1	1	2.66146e-13
HOPX	1.69741e-17	-2.47692	1	1	3.04566e-13
PRSS27	2.25546e-17	-2.56561	0.996	0.998	4.04697e-13
KRT78	2.60907e-17	-4.27256	1	0.999	4.68146e-13
GPX3	2.6742e-17	-1.41096	1	1	4.79831e-13
CALML5	3.33957e-17	-3.4071	1	0.983	5.99218e-13
TNS4	6.86688e-16	-1.84601	1	0.981	1.23213e-11
THBS2	7.60826e-16	-0.72793	1	0.991	1.36515e-11
KRT13	1.66673e-15	-1.79578	1	1	2.99062e-11
SLURP1	4.19052e-15	-3.31173	1	1	7.51905e-11
TGM3	2.19777e-14	-3.71606	1	1	3.94346e-10
HIST1H1B	1.31455e-13	-1.47673	0.996	1	2.3587e-09
NCCRP1	6.34382e-13	-2.99099	1	1	1.13827e-08
MT2A	7.00519e-12	0.347122	1	1	1.25694e-07
KRT1	2.50454e-11	-2.66377	1	1	4.49389e-07
KLK6	6.62621e-11	-2.17385	1	1	1.18894e-06
SPRR2G	5.57222e-10	-4.19344	1	0.999	9.99823e-06
FOSB	4.33374e-09	-1.12492	1	1	7.77602e-05
SPRR2D	1.80505e-08	-3.39245	0.992	0.998	0.00032388
RPTN	2.56689e-08	-5.56557	0.996	0.991	0.000460578
LCE3E	1.38953e-07	-2.47853	1	1	0.00249323
CXCL14	3.96143e-07	-0.434855	1	1	0.00710799
KRT76	1.19504e-06	-2.7164	1	1	0.0214426
KRT3	2.25016e-06	-1.80807	1	0.992	0.0403747
IGFBP2	5.04461e-06	-1.04072	1	1	0.0905155
MAL	2.08564e-05	-2.58968	0.996	0.991	0.374227
SPRR2F	6.34176e-05	-1.83946	0.988	0.985	1
LCE3D	0.000303665	-4.78436	0.98	0.998	1
S100A7	0.000312932	-2.87704	0.996	0.999	1
HSPB8	0.00050296	-1.4883	1	1	1
LOR	0.00178042	-4.60047	1	0.984	1
MT1X	0.00245561	-0.331558	1	1	1
RHCG	0.00645229	-2.37531	1	1	1
SLURP2	0.00855002	-1.84674	0.992	0.999	1
KRT15	0.0138525	-2.05192	1	1	1
SPRR3	0.0298215	-2.99873	1	1	1
SPINK7	0.0330386	-3.7275	1	1	1
CRNN	0.0412117	-3.62902	0.996	1	1
DST	0.0750795	-1.61891	1	0.997	1
LCN2	0.0832848	-2.0869	1	1	1
CNFN	0.138186	-3.187	1	1	1
LAMB3	0.138597	-0.92691	0.996	0.99	1
CLDN4	0.201891	-1.34678	1	1	1
IL36G	0.22279	-2.10652	1	0.975	1
KRT4	0.335767	-1.4848	1	0.989	1
TMPRSS11B	0.357201	-2.44631	1	1	1
KLK12	0.412005	-2.26645	1	1	1
COL17A1	0.466316	-1.67971	1	1	1
CRCT1	0.665533	-3.42286	0.984	0.984	1
TMPRSS11E	0.727555	-2.2751	0.996	0.997	1
