# Supplementary material for: Spatially resolved transcriptomics reveals pro-inflammatory fibroblast involved in lymphocyte recruitment through CXCL8 and CXCL10
Source: eLife journal article supplement (doi:10.7554/elife.81525), 2023-01-17
Supplement: supp [file elife_poa_e81525_Table_1_source_data_1.xlsx]

## Sheet: A1 - cluster 3 subepithelial
Term	Overlap	P-value	Adjusted P-value	Old P-value	Old Adjusted P-value	Odds Ratio	Combined Score	Genes
P53 pathway feedback loops 1 Homo sapiens P04392	2022-03-07	4.3285e-05	0.00160155	0	0	68.993	693.221	TP53;TP63;TP73
p53 pathway feedback loops 2 Homo sapiens P04398	4/45	0.00144172	0.0181238	0	0	8.99977	58.8757	MYC;TP53;TP63;TP73
p53 pathway by glucose deprivation Homo sapiens P04397	2022-03-21	0.0014695	0.0181238	0	0	15.3209	99.9359	TP53;TP63;TP73
Integrin signalling pathway Homo sapiens P00034	6/156	0.00735442	0.0558628	0	0	3.70415	18.1965	COL17A1;LAMA5;LAMB3;ITGB4;LAMA3;LAMB4
p53 pathway Homo sapiens P00059	4/71	0.00754902	0.0558628	0	0	5.50007	26.8752	TP53;TP63;DDB2;TP73
Huntington disease Homo sapiens P00029	5/124	0.0116229	0.0716746	0	0	3.87876	17.279	ARL4C;CYC1;TP53;TP63;TP73
Cadherin signaling pathway Homo sapiens P00012	5/150	0.0244061	0.129004	0	0	3.17905	11.8036	WNT10A;CDHR1;PCDH7;CELSR1;EGFR
5-Hydroxytryptamine degredation Homo sapiens P04372	2022-01-05	0.0533298	0.24665	0	0	22.7857	66.7909	ALDH3A1
Serine glycine biosynthesis Homo sapiens P02776	2022-01-06	0.063651	0.261676	0	0	18.2276	50.2051	PHGDH
Pentose phosphate pathway Homo sapiens P02762	2022-01-08	0.0839587	0.284095	0	0	13.0184	32.2523	TKT
Wnt signaling pathway Homo sapiens P00057	6/278	0.0844607	0.284095	0	0	2.03004	5.01717	WNT10A;MYC;CDHR1;PCDH7;CELSR1;TP53
PDGF signaling pathway Homo sapiens P00047	3/112	0.123621	0.381166	0	0	2.51841	5.26482	VAV3;MYC;ERF
Glycolysis Homo sapiens P00024	2022-01-17	0.170052	0.483993	0	0	5.69297	10.086	ENO1
Oxidative stress response Homo sapiens P00046	2022-01-24	0.231402	0.571608	0	0	3.95893	5.79427	MYC
De novo purine biosynthesis Homo sapiens P02738	2022-01-26	0.248087	0.571608	0	0	3.64184	5.07664	IMPDH2
Beta2 adrenergic receptor signaling pathway Homo sapiens P04378	2022-01-28	0.264411	0.571608	0	0	3.37174	4.48526	CACNB4
Beta1 adrenergic receptor signaling pathway Homo sapiens P04377	2022-01-28	0.264411	0.571608	0	0	3.37174	4.48526	CACNB4
FAS signaling pathway Homo sapiens P00020	2022-01-31	0.288237	0.571608	0	0	3.0341	3.77433	CYC1
Alzheimer disease-presenilin pathway Homo sapiens P00004	2/99	0.293528	0.571608	0	0	1.87906	2.30331	WNT10A;CD44
Notch signaling pathway Homo sapiens P00045	1/38	0.340887	0.609234	0	0	2.45921	2.64661	JAG2
Oxytocin receptor mediated signaling pathway Homo sapiens P04391	1/39	0.348085	0.609234	0	0	2.39437	2.5268	CACNB4
Thyrotropin-releasing hormone receptor signaling pathway Homo sapiens P04394	1/41	0.362248	0.609234	0	0	2.27442	2.30951	CACNB4
Ionotropic glutamate receptor pathway Homo sapiens P00037	1/45	0.389659	0.611004	0	0	2.06724	1.94834	SLC1A3
5HT2 type receptor mediated signaling pathway Homo sapiens P04374	1/46	0.396327	0.611004	0	0	2.0212	1.87065	CACNB4
Metabotropic glutamate receptor group III pathway Homo sapiens P00039	1/54	0.447123	0.637297	0	0	1.71542	1.38077	SLC1A3
Angiogenesis Homo sapiens P00005	2/142	0.459664	0.637297	0	0	1.29907	1.00972	JAG2;WNT10A
B cell activation Homo sapiens P00010	1/57	0.465055	0.637297	0	0	1.62327	1.24278	VAV3
Cytoskeletal regulation by Rho GTPase Homo sapiens P00016	1/70	0.536302	0.70345	0	0	1.31657	0.8203	STMN1
T cell activation Homo sapiens P00053	1/73	0.551353	0.70345	0	0	1.26152	0.751085	VAV3
Interleukin signaling pathway Homo sapiens P00036	1/86	0.611151	0.73806	0	0	1.06788	0.525835	MYC
TGF-beta signaling pathway Homo sapiens P00052	1/88	0.619618	0.73806	0	0	1.04322	0.499341	BMP7
FGF signaling pathway Homo sapiens P00021	1/99	0.66301	0.73806	0	0	0.925609	0.380392	FGFR2
Apoptosis signaling pathway Homo sapiens P00006	1/102	0.673964	0.73806	0	0	0.897979	0.354323	TP53
Heterotrimeric G-protein signaling pathway-Gq alpha and Go alpha mediated pathway Homo sapiens P00027	1/106	0.68802	0.73806	0	0	0.863594	0.32293	GPSM2
EGF receptor signaling pathway Homo sapiens P00018	1/109	0.698165	0.73806	0	0	0.839478	0.301624	EGFR
Heterotrimeric G-protein signaling pathway-Gi alpha and Gs alpha mediated pathway Homo sapiens P00026	1/127	0.752495	0.773397	0	0	0.718894	0.204426	GPSM2
CCKR signaling map ST Homo sapiens P06959	1/165	0.837302	0.837302	0	0	0.551253	0.097886	MYC

## Sheet: B1 - cluster 2 sulcular
Term	Overlap	P-value	Adjusted P-value	Old P-value	Old Adjusted P-value	Odds Ratio	Combined Score	Genes
Integrin signalling pathway Homo sapiens P00034	13/156	5.67008e-09	2.04123e-07	0	0	9.60802	182.438	COL16A1;COL14A1;COL12A1;FN1;ACTB;COL1A1;COL3A1;COL1A2;COL5A1;PIK3CA;COL6A2;COL6A1;COL6A3
Inflammation mediated by chemokine and cytokine signaling pathway Homo sapiens P00031	8/188	0.000604139	0.0108745	0	0	4.56568	33.8395	PIK3CA;COL14A1;COL6A2;COL12A1;COL6A1;COL6A3;ACTB;NFATC4
Vasopressin synthesis Homo sapiens P04395	2022-02-10	0.00420588	0.0504706	0	0	25.118	137.428	CPE;PAM
Axon guidance mediated by netrin Homo sapiens P00009	2/30	0.0357035	0.261476	0	0	7.16933	23.8918	PIK3CA;NFATC4
T cell activation Homo sapiens P00053	3/73	0.0363162	0.261476	0	0	4.31436	14.3042	CD74;PIK3CA;NFATC4
PI3 kinase pathway Homo sapiens P00048	2/42	0.0654364	0.391832	0	0	5.01548	13.6756	PIK3CA;FOXO4
Alzheimer disease-presenilin pathway Homo sapiens P00004	3/99	0.0761896	0.391832	0	0	3.14174	8.08851	LRP1;MMP2;ACTB
B cell activation Homo sapiens P00010	2/57	0.110301	0.496354	0	0	3.64485	8.03524	PIK3CA;NFATC4
Axon guidance mediated by Slit/Robo Homo sapiens P00008	2022-01-18	0.164791	0.623192	0	0	5.8776	10.5978	CXCL12
DNA replication Homo sapiens P00017	2022-01-19	0.173109	0.623192	0	0	5.55079	9.73516	RNASEH1
Hypoxia response via HIF activation Homo sapiens P00030	2022-01-24	0.213478	0.6474	0	0	4.343	6.70655	PIK3CA
CCKR signaling map ST Homo sapiens P06959	3/165	0.226611	0.6474	0	0	1.85554	2.75458	CPE;CLU;AKAP1
General transcription regulation Homo sapiens P00023	2022-01-28	0.244356	0.6474	0	0	3.69884	5.21214	GTF2B
FAS signaling pathway Homo sapiens P00020	2022-01-31	0.26672	0.6474	0	0	3.32845	4.39873	GSN
Apoptosis signaling pathway Homo sapiens P00006	2/102	0.26975	0.6474	0	0	2.0001	2.62065	PIK3CA;REL
Insulin/IGF pathway-protein kinase B signaling cascade Homo sapiens P00033	1/34	0.288426	0.648958	0	0	3.02541	3.76154	PIK3CA
PDGF signaling pathway Homo sapiens P00047	2/112	0.306553	0.649171	0	0	1.81735	2.14877	PDGFRB;PIK3CA
Transcription regulation by bZIP transcription factor Homo sapiens P00055	1/42	0.343233	0.652831	0	0	2.4341	2.60289	GTF2B
Huntington disease Homo sapiens P00029	2/124	0.350222	0.652831	0	0	1.6376	1.71815	HIP1R;ACTB
p53 pathway feedback loops 2 Homo sapiens P04398	1/45	0.362684	0.652831	0	0	2.26779	2.30005	PIK3CA
Toll receptor signaling pathway Homo sapiens P00054	1/49	0.38773	0.653737	0	0	2.07839	1.96916	TBK1
Angiogenesis Homo sapiens P00005	2/142	0.413817	0.653737	0	0	1.42574	1.25798	PDGFRB;PIK3CA
VEGF signaling pathway Homo sapiens P00056	1/54	0.417665	0.653737	0	0	1.88184	1.64298	PIK3CA
Nicotinic acetylcholine receptor signaling pathway Homo sapiens P00044	1/68	0.493957	0.678619	0	0	1.48756	1.04919	ACTB
Ras Pathway Homo sapiens P04393	1/69	0.49901	0.678619	0	0	1.46561	1.01879	PIK3CA
Cytoskeletal regulation by Rho GTPase Homo sapiens P00016	1/70	0.504012	0.678619	0	0	1.4443	0.989569	ACTB
p53 pathway Homo sapiens P00059	1/71	0.508964	0.678619	0	0	1.42359	0.961463	PIK3CA
Endothelin signaling pathway Homo sapiens P00019	1/75	0.528287	0.679226	0	0	1.34637	0.85914	PIK3CA
Interleukin signaling pathway Homo sapiens P00036	1/86	0.57761	0.703212	0	0	1.17148	0.642974	PIK3CA
TGF-beta signaling pathway Homo sapiens P00052	1/88	0.58601	0.703212	0	0	1.14443	0.611607	SMAD4
FGF signaling pathway Homo sapiens P00021	1/99	0.629324	0.725207	0	0	1.01541	0.470245	PIK3CA
Heterotrimeric G-protein signaling pathway-Gq alpha and Go alpha mediated pathway Homo sapiens P00027	1/106	0.654508	0.725207	0	0	0.947379	0.401567	BDKRB2
EGF receptor signaling pathway Homo sapiens P00018	1/109	0.664773	0.725207	0	0	0.920922	0.376021	PIK3CA
Heterotrimeric G-protein signaling pathway-Gi alpha and Gs alpha mediated pathway Homo sapiens P00026	1/127	0.720293	0.762663	0	0	0.78864	0.258751	PHKG2
Wnt signaling pathway Homo sapiens P00057	2/278	0.76676	0.778119	0	0	0.718201	0.19074	SMAD4;NFATC4
Cadherin signaling pathway Homo sapiens P00012	1/150	0.778119	0.778119	0	0	0.666124	0.167115	ACTB
